# Supplementary material for: Influence of Poly(vinylpyrrolidone) concentration on properties of silver nanoparticles manufactured by modified thermal treatment method
Source: PubMed Central journal article supplement (PMC5646761; doi:10.1371/journal.pone.0186094), 2017-10-18
Supplement: pone.0186094.s001.pdf [file pone.0186094.s001.pdf]

**Fig 2 data:**

| wave number<br>( $\text{cm}^{-1}$ ) | Transmittance | Transmittance | Transmittance | Transmittance |
|-------------------------------------|---------------|---------------|---------------|---------------|
|                                     |               | 2%            | 3%            | 4%            |
| 4000                                | 99.61892      | 104.21043     | 102.38465     | 101.20301     |
| 3999                                | 99.59793      | 104.14657     | 102.32413     | 101.15716     |
| 3998                                | 99.57733      | 104.08317     | 102.26424     | 101.11191     |
| 3997                                | 99.55735      | 104.02024     | 102.20499     | 101.06727     |
| 3996                                | 99.53823      | 103.95777     | 102.14637     | 101.02323     |
| 3995                                | 99.52021      | 103.89577     | 102.08839     | 100.9798      |
| 3994                                | 99.50351      | 103.83422     | 102.03104     | 100.93695     |
| 3993                                | 99.48836      | 103.77313     | 101.97432     | 100.89471     |
| 3992                                | 99.47494      | 103.71251     | 101.91823     | 100.85305     |
| 3991                                | 99.4634       | 103.65234     | 101.86277     | 100.81198     |
| 3990                                | 99.45387      | 103.59263     | 101.80793     | 100.7715      |
| 3989                                | 99.4464       | 103.53338     | 101.75372     | 100.7316      |
| 3988                                | 99.44095      | 103.47459     | 101.70013     | 100.69229     |
| 3987                                | 99.43742      | 103.41626     | 101.64716     | 100.65355     |
| 3986                                | 99.43562      | 103.35838     | 101.59481     | 100.61539     |
| 3985                                | 99.43531      | 103.30095     | 101.54307     | 100.5778      |
| 3984                                | 99.43619      | 103.24398     | 101.49195     | 100.54078     |
| 3983                                | 99.43798      | 103.18747     | 101.44145     | 100.50432     |
| 3982                                | 99.44038      | 103.1314      | 101.39155     | 100.46843     |
| 3981                                | 99.44316      | 103.07579     | 101.34226     | 100.4331      |
| 3980                                | 99.44612      | 103.02063     | 101.29358     | 100.39833     |
| 3979                                | 99.44911      | 102.96592     | 101.2455      | 100.36411     |
| 3978                                | 99.45204      | 102.91166     | 101.19803     | 100.33045     |
| 3977                                | 99.45483      | 102.85785     | 101.15115     | 100.29733     |
| 3976                                | 99.45745      | 102.80449     | 101.10487     | 100.26475     |
| 3975                                | 99.45993      | 102.75157     | 101.05919     | 100.23272     |
| 3974                                | 99.46232      | 102.6991      | 101.01409     | 100.20123     |
| 3973                                | 99.46473      | 102.64707     | 100.96959     | 100.17027     |
| 3972                                | 99.46729      | 102.59549     | 100.92568     | 100.13984     |
| 3971                                | 99.47014      | 102.54435     | 100.88235     | 100.10994     |
| 3970                                | 99.47341      | 102.49366     | 100.8396      | 100.08057     |
| 3969                                | 99.4772       | 102.4434      | 100.79743     | 100.05172     |
| 3968                                | 99.48156      | 102.39359     | 100.75584     | 100.02338     |
| 3967                                | 99.48655      | 102.34421     | 100.71482     | 99.99556      |
| 3966                                | 99.49222      | 102.29528     | 100.67437     | 99.96825      |
| 3965                                | 99.49862      | 102.24678     | 100.63449     | 99.94145      |
| 3964                                | 99.50583      | 102.19871     | 100.59518     | 99.91516      |

|      |          |           |           |          |
|------|----------|-----------|-----------|----------|
| 3963 | 99.51394 | 102.15108 | 100.55643 | 99.88936 |
| 3962 | 99.523   | 102.10389 | 100.51824 | 99.86406 |
| 3961 | 99.53303 | 102.05713 | 100.48061 | 99.83925 |
| 3960 | 99.544   | 102.0108  | 100.44353 | 99.81493 |
| 3959 | 99.55579 | 101.9649  | 100.407   | 99.79109 |
| 3958 | 99.56824 | 101.91943 | 100.37101 | 99.76774 |
| 3957 | 99.58119 | 101.87439 | 100.33557 | 99.74486 |
| 3956 | 99.59447 | 101.82978 | 100.30068 | 99.72246 |
| 3955 | 99.60795 | 101.78559 | 100.26632 | 99.70053 |
| 3954 | 99.62122 | 101.74182 | 100.23249 | 99.67906 |
| 3953 | 99.63477 | 101.69849 | 100.1992  | 99.65806 |
| 3952 | 99.64829 | 101.65557 | 100.16644 | 99.63751 |
| 3951 | 99.6616  | 101.61307 | 100.1342  | 99.61742 |
| 3950 | 99.67448 | 101.571   | 100.10248 | 99.59778 |
| 3949 | 99.68672 | 101.52934 | 100.07128 | 99.57859 |
| 3948 | 99.69816 | 101.4881  | 100.04059 | 99.55983 |
| 3947 | 99.70863 | 101.44728 | 100.01042 | 99.54152 |
| 3946 | 99.71805 | 101.40687 | 99.98075  | 99.52364 |
| 3945 | 99.72638 | 101.36688 | 99.95159  | 99.50619 |
| 3944 | 99.7336  | 101.32729 | 99.92292  | 99.48916 |
| 3943 | 99.73977 | 101.28812 | 99.89476  | 99.47256 |
| 3942 | 99.74492 | 101.24936 | 99.86709  | 99.45637 |
| 3941 | 99.74913 | 101.21101 | 99.8399   | 99.4406  |
| 3940 | 99.7525  | 101.17306 | 99.81321  | 99.42524 |
| 3939 | 99.75514 | 101.13552 | 99.78699  | 99.41028 |
| 3938 | 99.75716 | 101.09838 | 99.76126  | 99.39572 |
| 3937 | 99.75871 | 101.06165 | 99.736    | 99.38156 |
| 3936 | 99.75993 | 101.02531 | 99.71121  | 99.36779 |
| 3935 | 99.76095 | 100.98938 | 99.68689  | 99.35441 |
| 3934 | 99.76189 | 100.95384 | 99.66303  | 99.34142 |
| 3933 | 99.7628  | 100.9187  | 99.63964  | 99.3288  |
| 3932 | 99.76369 | 100.88396 | 99.61669  | 99.31656 |
| 3931 | 99.76448 | 100.84961 | 99.59421  | 99.30469 |
| 3930 | 99.76503 | 100.81565 | 99.57216  | 99.29318 |
| 3929 | 99.76516 | 100.78208 | 99.55057  | 99.28204 |
| 3928 | 99.76474 | 100.74891 | 99.52941  | 99.27126 |
| 3927 | 99.76363 | 100.71612 | 99.50869  | 99.26083 |
| 3926 | 99.76182 | 100.68371 | 99.48841  | 99.25075 |
| 3925 | 99.75932 | 100.65169 | 99.46855  | 99.24101 |
| 3924 | 99.75618 | 100.62006 | 99.44912  | 99.23162 |
| 3923 | 99.75247 | 100.5888  | 99.4301   | 99.22256 |

|      |          |           |          |          |
|------|----------|-----------|----------|----------|
| 3922 | 99.74821 | 100.55793 | 99.41151 | 99.21383 |
| 3921 | 99.7434  | 100.52743 | 99.39333 | 99.20543 |
| 3920 | 99.73798 | 100.49731 | 99.37555 | 99.19736 |
| 3919 | 99.73195 | 100.46757 | 99.35818 | 99.1896  |
| 3918 | 99.7253  | 100.4382  | 99.34122 | 99.18215 |
| 3917 | 99.71815 | 100.4092  | 99.32464 | 99.17502 |
| 3916 | 99.71063 | 100.38057 | 99.30846 | 99.16819 |
| 3915 | 99.70294 | 100.3523  | 99.29267 | 99.16167 |
| 3914 | 99.69522 | 100.32441 | 99.27727 | 99.15544 |
| 3913 | 99.68755 | 100.29688 | 99.26224 | 99.1495  |
| 3912 | 99.67991 | 100.26971 | 99.24759 | 99.14385 |
| 3911 | 99.67222 | 100.24291 | 99.23331 | 99.13848 |
| 3910 | 99.66444 | 100.21646 | 99.2194  | 99.1334  |
| 3909 | 99.65662 | 100.19037 | 99.20585 | 99.12859 |
| 3908 | 99.64888 | 100.16464 | 99.19267 | 99.12404 |
| 3907 | 99.64144 | 100.13927 | 99.17983 | 99.11977 |
| 3906 | 99.63449 | 100.11424 | 99.16735 | 99.11576 |
| 3905 | 99.62814 | 100.08957 | 99.15522 | 99.112   |
| 3904 | 99.62231 | 100.06524 | 99.14343 | 99.1085  |
| 3903 | 99.61652 | 100.04127 | 99.13198 | 99.10524 |
| 3902 | 99.61105 | 100.01764 | 99.12086 | 99.10223 |
| 3901 | 99.60532 | 99.99435  | 99.11008 | 99.09946 |
| 3900 | 99.59915 | 99.9714   | 99.09962 | 99.09693 |
| 3899 | 99.59251 | 99.9488   | 99.08948 | 99.09462 |
| 3898 | 99.58549 | 99.92653  | 99.07966 | 99.09255 |
| 3897 | 99.57825 | 99.9046   | 99.07016 | 99.09069 |
| 3896 | 99.57101 | 99.883    | 99.06097 | 99.08906 |
| 3895 | 99.56393 | 99.86174  | 99.05208 | 99.08764 |
| 3894 | 99.55717 | 99.8408   | 99.04349 | 99.08643 |
| 3893 | 99.55087 | 99.8202   | 99.0352  | 99.08542 |
| 3892 | 99.54509 | 99.79992  | 99.0272  | 99.08462 |
| 3891 | 99.53989 | 99.77997  | 99.0195  | 99.08401 |
| 3890 | 99.53527 | 99.76034  | 99.01208 | 99.0836  |
| 3889 | 99.53124 | 99.74103  | 99.00494 | 99.08337 |
| 3888 | 99.52779 | 99.72204  | 98.99807 | 99.08334 |
| 3887 | 99.52491 | 99.70336  | 98.99148 | 99.08348 |
| 3886 | 99.52266 | 99.68501  | 98.98516 | 99.08379 |
| 3885 | 99.52107 | 99.66696  | 98.97911 | 99.08428 |
| 3884 | 99.52024 | 99.64923  | 98.97331 | 99.08494 |
| 3883 | 99.52025 | 99.63181  | 98.96777 | 99.08576 |
| 3882 | 99.52117 | 99.61469  | 98.96248 | 99.08675 |

|      |          |          |          |          |
|------|----------|----------|----------|----------|
| 3881 | 99.52303 | 99.59788 | 98.95745 | 99.08789 |
| 3880 | 99.52586 | 99.58137 | 98.95265 | 99.08918 |
| 3879 | 99.52963 | 99.56517 | 98.9481  | 99.09061 |
| 3878 | 99.53433 | 99.54926 | 98.94379 | 99.0922  |
| 3877 | 99.53997 | 99.53365 | 98.9397  | 99.09392 |
| 3876 | 99.54656 | 99.51833 | 98.93585 | 99.09578 |
| 3875 | 99.55407 | 99.50331 | 98.93222 | 99.09777 |
| 3874 | 99.56238 | 99.48858 | 98.92881 | 99.09989 |
| 3873 | 99.5713  | 99.47414 | 98.92562 | 99.10214 |
| 3872 | 99.58055 | 99.45999 | 98.92264 | 99.1045  |
| 3871 | 99.58982 | 99.44612 | 98.91987 | 99.10699 |
| 3870 | 99.59887 | 99.43254 | 98.91731 | 99.10958 |
| 3869 | 99.60759 | 99.41923 | 98.91494 | 99.11229 |
| 3868 | 99.61594 | 99.40621 | 98.91278 | 99.1151  |
| 3867 | 99.62352 | 99.39346 | 98.91081 | 99.11802 |
| 3866 | 99.63113 | 99.38098 | 98.90903 | 99.12103 |
| 3865 | 99.63821 | 99.36878 | 98.90743 | 99.12414 |
| 3864 | 99.64459 | 99.35685 | 98.90602 | 99.12733 |
| 3863 | 99.64999 | 99.34519 | 98.90479 | 99.13062 |
| 3862 | 99.65419 | 99.33379 | 98.90373 | 99.13399 |
| 3861 | 99.65708 | 99.32266 | 98.90285 | 99.13744 |
| 3860 | 99.65876 | 99.31179 | 98.90213 | 99.14097 |
| 3859 | 99.65954 | 99.30118 | 98.90157 | 99.14458 |
| 3858 | 99.65985 | 99.29083 | 98.90118 | 99.14825 |
| 3857 | 99.66009 | 99.28073 | 98.90094 | 99.15199 |
| 3856 | 99.66055 | 99.27089 | 98.90086 | 99.15579 |
| 3855 | 99.66133 | 99.2613  | 98.90093 | 99.15966 |
| 3854 | 99.66235 | 99.25195 | 98.90114 | 99.16358 |
| 3853 | 99.66347 | 99.24286 | 98.9015  | 99.16756 |
| 3852 | 99.66454 | 99.23401 | 98.90199 | 99.17158 |
| 3851 | 99.66542 | 99.2254  | 98.90262 | 99.17566 |
| 3850 | 99.66602 | 99.21703 | 98.90339 | 99.17977 |
| 3849 | 99.66624 | 99.20891 | 98.90428 | 99.18393 |
| 3848 | 99.66599 | 99.20102 | 98.9053  | 99.18813 |
| 3847 | 99.66517 | 99.19336 | 98.90644 | 99.19237 |
| 3846 | 99.66374 | 99.18593 | 98.9077  | 99.19663 |
| 3845 | 99.6617  | 99.17874 | 98.90907 | 99.20093 |
| 3844 | 99.65917 | 99.17177 | 98.91056 | 99.20525 |
| 3843 | 99.65631 | 99.16503 | 98.91216 | 99.20959 |
| 3842 | 99.65333 | 99.15851 | 98.91387 | 99.21396 |
| 3841 | 99.65043 | 99.15222 | 98.91567 | 99.21834 |

|      |          |          |          |          |
|------|----------|----------|----------|----------|
| 3840 | 99.64776 | 99.14614 | 98.91758 | 99.22274 |
| 3839 | 99.64537 | 99.14028 | 98.91958 | 99.22715 |
| 3838 | 99.64324 | 99.13463 | 98.92168 | 99.23158 |
| 3837 | 99.64134 | 99.1292  | 98.92387 | 99.23601 |
| 3836 | 99.63958 | 99.12398 | 98.92615 | 99.24044 |
| 3835 | 99.63794 | 99.11896 | 98.92851 | 99.24488 |
| 3834 | 99.63637 | 99.11415 | 98.93095 | 99.24931 |
| 3833 | 99.63484 | 99.10955 | 98.93347 | 99.25374 |
| 3832 | 99.63333 | 99.10515 | 98.93606 | 99.25817 |
| 3831 | 99.63179 | 99.10094 | 98.93873 | 99.26259 |
| 3830 | 99.63023 | 99.09694 | 98.94147 | 99.267   |
| 3829 | 99.62868 | 99.09313 | 98.94428 | 99.2714  |
| 3828 | 99.62718 | 99.08951 | 98.94715 | 99.27578 |
| 3827 | 99.6258  | 99.08609 | 98.95008 | 99.28015 |
| 3826 | 99.62457 | 99.08285 | 98.95308 | 99.28449 |
| 3825 | 99.62348 | 99.0798  | 98.95613 | 99.28882 |
| 3824 | 99.62252 | 99.07693 | 98.95923 | 99.29312 |
| 3823 | 99.62162 | 99.07425 | 98.96238 | 99.2974  |
| 3822 | 99.62074 | 99.07174 | 98.96558 | 99.30165 |
| 3821 | 99.61986 | 99.06941 | 98.96883 | 99.30587 |
| 3820 | 99.61897 | 99.06726 | 98.97212 | 99.31006 |
| 3819 | 99.61811 | 99.06529 | 98.97546 | 99.31422 |
| 3818 | 99.61731 | 99.06348 | 98.97883 | 99.31834 |
| 3817 | 99.61659 | 99.06184 | 98.98224 | 99.32243 |
| 3816 | 99.61551 | 99.06038 | 98.98568 | 99.32647 |
| 3815 | 99.6151  | 99.05907 | 98.98915 | 99.33048 |
| 3814 | 99.61515 | 99.05793 | 98.99265 | 99.33445 |
| 3813 | 99.61554 | 99.05695 | 98.99618 | 99.33837 |
| 3812 | 99.61617 | 99.05613 | 98.99973 | 99.34225 |
| 3811 | 99.61697 | 99.05546 | 99.00331 | 99.34608 |
| 3810 | 99.61785 | 99.05495 | 99.00691 | 99.34986 |
| 3809 | 99.61873 | 99.05459 | 99.01052 | 99.35359 |
| 3808 | 99.61947 | 99.05438 | 99.01415 | 99.35728 |
| 3807 | 99.61992 | 99.05432 | 99.0178  | 99.36091 |
| 3806 | 99.62001 | 99.0544  | 99.02145 | 99.36448 |
| 3805 | 99.6197  | 99.05463 | 99.02512 | 99.36801 |
| 3804 | 99.61907 | 99.055   | 99.02879 | 99.37147 |
| 3803 | 99.61827 | 99.0555  | 99.03247 | 99.37488 |
| 3802 | 99.61748 | 99.05615 | 99.03616 | 99.37824 |
| 3801 | 99.61687 | 99.05693 | 99.03984 | 99.38153 |
| 3800 | 99.61653 | 99.05784 | 99.04353 | 99.38476 |

|      |          |          |          |          |
|------|----------|----------|----------|----------|
| 3799 | 99.61652 | 99.05889 | 99.04721 | 99.38793 |
| 3798 | 99.61683 | 99.06006 | 99.0509  | 99.39104 |
| 3797 | 99.61739 | 99.06136 | 99.05457 | 99.39408 |
| 3796 | 99.61811 | 99.06279 | 99.05825 | 99.39706 |
| 3795 | 99.61887 | 99.06434 | 99.06191 | 99.39998 |
| 3794 | 99.61949 | 99.06601 | 99.06556 | 99.40283 |
| 3793 | 99.61979 | 99.06779 | 99.0692  | 99.40561 |
| 3792 | 99.61952 | 99.0697  | 99.07283 | 99.40833 |
| 3791 | 99.61838 | 99.07171 | 99.07644 | 99.41097 |
| 3790 | 99.61598 | 99.07384 | 99.08004 | 99.41355 |
| 3789 | 99.61266 | 99.07609 | 99.08362 | 99.41606 |
| 3788 | 99.60839 | 99.07844 | 99.08718 | 99.4185  |
| 3787 | 99.60315 | 99.08089 | 99.09072 | 99.42087 |
| 3786 | 99.5969  | 99.08345 | 99.09424 | 99.42317 |
| 3785 | 99.58965 | 99.08611 | 99.09774 | 99.4254  |
| 3784 | 99.58139 | 99.08888 | 99.10121 | 99.42755 |
| 3783 | 99.57219 | 99.09174 | 99.10466 | 99.42963 |
| 3782 | 99.56221 | 99.09469 | 99.10808 | 99.43164 |
| 3781 | 99.5517  | 99.09775 | 99.11147 | 99.43358 |
| 3780 | 99.541   | 99.10089 | 99.11483 | 99.43545 |
| 3779 | 99.53052 | 99.10413 | 99.11817 | 99.43724 |
| 3778 | 99.52066 | 99.10745 | 99.12147 | 99.43896 |
| 3777 | 99.51177 | 99.11086 | 99.12474 | 99.4406  |
| 3776 | 99.50417 | 99.11435 | 99.12797 | 99.44217 |
| 3775 | 99.49805 | 99.11793 | 99.13117 | 99.44367 |
| 3774 | 99.49355 | 99.12159 | 99.13434 | 99.44509 |
| 3773 | 99.49071 | 99.12533 | 99.13747 | 99.44644 |
| 3772 | 99.48947 | 99.12914 | 99.14056 | 99.44772 |
| 3771 | 99.48968 | 99.13303 | 99.14361 | 99.44892 |
| 3770 | 99.4911  | 99.13699 | 99.14663 | 99.45005 |
| 3769 | 99.49353 | 99.14102 | 99.1496  | 99.45111 |
| 3768 | 99.49682 | 99.14513 | 99.15254 | 99.45209 |
| 3767 | 99.50095 | 99.1493  | 99.15543 | 99.453   |
| 3766 | 99.50603 | 99.15353 | 99.15828 | 99.45384 |
| 3765 | 99.51224 | 99.15783 | 99.16109 | 99.4546  |
| 3764 | 99.51976 | 99.1622  | 99.16385 | 99.4553  |
| 3763 | 99.5287  | 99.16662 | 99.16657 | 99.45592 |
| 3762 | 99.53901 | 99.1711  | 99.16925 | 99.45647 |
| 3761 | 99.55047 | 99.17564 | 99.17188 | 99.45694 |
| 3760 | 99.56271 | 99.18023 | 99.17446 | 99.45735 |
| 3759 | 99.57529 | 99.18488 | 99.177   | 99.45769 |

|      |          |          |          |          |
|------|----------|----------|----------|----------|
| 3758 | 99.58774 | 99.18958 | 99.17949 | 99.45795 |
| 3757 | 99.59963 | 99.19432 | 99.18194 | 99.45815 |
| 3756 | 99.6106  | 99.19912 | 99.18434 | 99.45828 |
| 3755 | 99.62033 | 99.20396 | 99.18668 | 99.45834 |
| 3754 | 99.62855 | 99.20885 | 99.18898 | 99.45833 |
| 3753 | 99.635   | 99.21377 | 99.19123 | 99.45826 |
| 3752 | 99.63952 | 99.21874 | 99.19344 | 99.45812 |
| 3751 | 99.64207 | 99.22375 | 99.19559 | 99.45792 |
| 3750 | 99.64274 | 99.2288  | 99.19769 | 99.45764 |
| 3749 | 99.64178 | 99.23388 | 99.19974 | 99.45731 |
| 3748 | 99.63956 | 99.239   | 99.20175 | 99.45691 |
| 3747 | 99.63646 | 99.24415 | 99.2037  | 99.45645 |
| 3746 | 99.63286 | 99.24933 | 99.2056  | 99.45593 |
| 3745 | 99.62904 | 99.25454 | 99.20745 | 99.45534 |
| 3744 | 99.62525 | 99.25978 | 99.20925 | 99.4547  |
| 3743 | 99.62167 | 99.26504 | 99.211   | 99.45399 |
| 3742 | 99.61849 | 99.27033 | 99.21269 | 99.45323 |
| 3741 | 99.61594 | 99.27564 | 99.21434 | 99.45241 |
| 3740 | 99.6142  | 99.28098 | 99.21593 | 99.45153 |
| 3739 | 99.61344 | 99.28633 | 99.21747 | 99.4506  |
| 3738 | 99.61367 | 99.2917  | 99.21897 | 99.44961 |
| 3737 | 99.61471 | 99.29709 | 99.22041 | 99.44857 |
| 3736 | 99.61623 | 99.3025  | 99.2218  | 99.44747 |
| 3735 | 99.61768 | 99.30792 | 99.22313 | 99.44632 |
| 3734 | 99.61836 | 99.31335 | 99.22442 | 99.44512 |
| 3733 | 99.61736 | 99.31879 | 99.22566 | 99.44387 |
| 3732 | 99.61446 | 99.32424 | 99.22684 | 99.44258 |
| 3731 | 99.60963 | 99.3297  | 99.22797 | 99.44123 |
| 3730 | 99.60293 | 99.33517 | 99.22906 | 99.43984 |
| 3729 | 99.59453 | 99.34064 | 99.23009 | 99.4384  |
| 3728 | 99.58463 | 99.34612 | 99.23107 | 99.43691 |
| 3727 | 99.57342 | 99.3516  | 99.23201 | 99.43539 |
| 3726 | 99.56109 | 99.35708 | 99.23289 | 99.43382 |
| 3725 | 99.54776 | 99.36256 | 99.23372 | 99.4322  |
| 3724 | 99.53348 | 99.36803 | 99.23451 | 99.43055 |
| 3723 | 99.51817 | 99.37351 | 99.23524 | 99.42886 |
| 3722 | 99.5017  | 99.37898 | 99.23593 | 99.42713 |
| 3721 | 99.48391 | 99.38445 | 99.23657 | 99.42537 |
| 3720 | 99.46468 | 99.38991 | 99.23716 | 99.42356 |
| 3719 | 99.44402 | 99.39536 | 99.2377  | 99.42173 |
| 3718 | 99.42212 | 99.4008  | 99.2382  | 99.41986 |

|      |          |          |          |          |
|------|----------|----------|----------|----------|
| 3717 | 99.39934 | 99.40623 | 99.23865 | 99.41796 |
| 3716 | 99.37612 | 99.41165 | 99.23905 | 99.41602 |
| 3715 | 99.35298 | 99.41706 | 99.23941 | 99.41406 |
| 3714 | 99.33035 | 99.42245 | 99.23972 | 99.41207 |
| 3713 | 99.30854 | 99.42783 | 99.23998 | 99.41005 |
| 3712 | 99.28773 | 99.43319 | 99.24021 | 99.40801 |
| 3711 | 99.26802 | 99.43853 | 99.24038 | 99.40594 |
| 3710 | 99.24944 | 99.44385 | 99.24052 | 99.40384 |
| 3709 | 99.23204 | 99.44916 | 99.24061 | 99.40173 |
| 3708 | 99.21585 | 99.45444 | 99.24065 | 99.39959 |
| 3707 | 99.20088 | 99.4597  | 99.24066 | 99.39743 |
| 3706 | 99.18709 | 99.46494 | 99.24062 | 99.39525 |
| 3705 | 99.17436 | 99.47015 | 99.24054 | 99.39306 |
| 3704 | 99.16251 | 99.47534 | 99.24042 | 99.39085 |
| 3703 | 99.15126 | 99.4805  | 99.24027 | 99.38862 |
| 3702 | 99.1403  | 99.48564 | 99.24007 | 99.38638 |
| 3701 | 99.12926 | 99.49074 | 99.23983 | 99.38412 |
| 3700 | 99.11779 | 99.49582 | 99.23955 | 99.38186 |
| 3699 | 99.10552 | 99.50086 | 99.23924 | 99.37958 |
| 3698 | 99.09209 | 99.50588 | 99.23889 | 99.3773  |
| 3697 | 99.07718 | 99.51086 | 99.2385  | 99.375   |
| 3696 | 99.06053 | 99.51581 | 99.23808 | 99.3727  |
| 3695 | 99.04198 | 99.52072 | 99.23762 | 99.37039 |
| 3694 | 99.0215  | 99.5256  | 99.23713 | 99.36808 |
| 3693 | 98.99924 | 99.53044 | 99.2366  | 99.36577 |
| 3692 | 98.97544 | 99.53525 | 99.23604 | 99.36345 |
| 3691 | 98.95036 | 99.54002 | 99.23545 | 99.36113 |
| 3690 | 98.9242  | 99.54475 | 99.23482 | 99.35881 |
| 3689 | 98.89707 | 99.54944 | 99.23416 | 99.35649 |
| 3688 | 98.86887 | 99.55409 | 99.23348 | 99.35417 |
| 3687 | 98.83941 | 99.5587  | 99.23276 | 99.35186 |
| 3686 | 98.80843 | 99.56327 | 99.23201 | 99.34955 |
| 3685 | 98.77567 | 99.56779 | 99.23124 | 99.34725 |
| 3684 | 98.74099 | 99.57227 | 99.23043 | 99.34495 |
| 3683 | 98.70439 | 99.57671 | 99.2296  | 99.34266 |
| 3682 | 98.66595 | 99.5811  | 99.22874 | 99.34038 |
| 3681 | 98.62588 | 99.58545 | 99.22786 | 99.33811 |
| 3680 | 98.58442 | 99.58975 | 99.22695 | 99.33584 |
| 3679 | 98.54178 | 99.59401 | 99.22601 | 99.3336  |
| 3678 | 98.49813 | 99.59821 | 99.22505 | 99.33136 |
| 3677 | 98.45356 | 99.60237 | 99.22407 | 99.32913 |



|      |          |          |          |          |
|------|----------|----------|----------|----------|
| 3676 | 98.40807 | 99.60648 | 99.22307 | 99.32693 |
| 3675 | 98.36154 | 99.61054 | 99.22204 | 99.32473 |
| 3674 | 98.31372 | 99.61455 | 99.22099 | 99.32255 |
| 3673 | 98.26428 | 99.61851 | 99.21992 | 99.32039 |
| 3672 | 98.21284 | 99.62242 | 99.21884 | 99.31825 |
| 3671 | 98.159   | 99.62627 | 99.21773 | 99.31613 |
| 3670 | 98.10239 | 99.63008 | 99.2166  | 99.31403 |
| 3669 | 98.04273 | 99.63383 | 99.21546 | 99.31195 |
| 3668 | 97.97982 | 99.63753 | 99.2143  | 99.30989 |
| 3667 | 97.91354 | 99.64117 | 99.21313 | 99.30785 |
| 3666 | 97.8438  | 99.64476 | 99.21193 | 99.30583 |
| 3665 | 97.77059 | 99.64829 | 99.21073 | 99.30384 |
| 3664 | 97.69389 | 99.65177 | 99.20951 | 99.30188 |
| 3663 | 97.61376 | 99.6552  | 99.20827 | 99.29994 |
| 3662 | 97.53026 | 99.65857 | 99.20703 | 99.29803 |
| 3661 | 97.44349 | 99.66188 | 99.20577 | 99.29614 |
| 3660 | 97.35357 | 99.66513 | 99.2045  | 99.29428 |
| 3659 | 97.26071 | 99.66833 | 99.20321 | 99.29245 |
| 3658 | 97.16518 | 99.67147 | 99.20192 | 99.29065 |
| 3657 | 97.06731 | 99.67455 | 99.20062 | 99.28888 |
| 3656 | 96.96747 | 99.67757 | 99.19931 | 99.28714 |
| 3655 | 96.86603 | 99.68054 | 99.198   | 99.28544 |
| 3654 | 96.76336 | 99.68344 | 99.19667 | 99.28376 |
| 3653 | 96.65973 | 99.68629 | 99.19534 | 99.28211 |
| 3652 | 96.55537 | 99.68907 | 99.194   | 99.2805  |
| 3651 | 96.45041 | 99.6918  | 99.19266 | 99.27892 |
| 3650 | 96.34486 | 99.69447 | 99.19131 | 99.27738 |
| 3649 | 96.23867 | 99.69707 | 99.18996 | 99.27587 |
| 3648 | 96.13169 | 99.69962 | 99.1886  | 99.27439 |
| 3647 | 96.02379 | 99.7021  | 99.18725 | 99.27295 |
| 3646 | 95.91482 | 99.70453 | 99.18589 | 99.27155 |
| 3645 | 95.80469 | 99.70689 | 99.18452 | 99.27018 |
| 3644 | 95.69338 | 99.70919 | 99.18316 | 99.26885 |
| 3643 | 95.58091 | 99.71143 | 99.1818  | 99.26755 |
| 3642 | 95.46735 | 99.71361 | 99.18043 | 99.2663  |
| 3641 | 95.35268 | 99.71573 | 99.17907 | 99.26507 |
| 3640 | 95.23682 | 99.71778 | 99.17771 | 99.26389 |
| 3639 | 95.11957 | 99.71978 | 99.17635 | 99.26275 |
| 3638 | 95.00059 | 99.72171 | 99.17499 | 99.26164 |
| 3637 | 94.87951 | 99.72358 | 99.17364 | 99.26057 |
| 3636 | 94.75595 | 99.72539 | 99.17229 | 99.25955 |

|      |          |          |          |          |
|------|----------|----------|----------|----------|
| 3635 | 94.62959 | 99.72713 | 99.17094 | 99.25856 |
| 3634 | 94.50023 | 99.72881 | 99.1696  | 99.25761 |
| 3633 | 94.36777 | 99.73043 | 99.16826 | 99.2567  |
| 3632 | 94.23224 | 99.73199 | 99.16693 | 99.25583 |
| 3631 | 94.09374 | 99.73349 | 99.16561 | 99.25499 |
| 3630 | 93.95242 | 99.73492 | 99.16429 | 99.2542  |
| 3629 | 93.80848 | 99.73629 | 99.16298 | 99.25345 |
| 3628 | 93.66212 | 99.7376  | 99.16168 | 99.25274 |
| 3627 | 93.51352 | 99.73885 | 99.16038 | 99.25207 |
| 3626 | 93.36288 | 99.74004 | 99.1591  | 99.25144 |
| 3625 | 93.21036 | 99.74116 | 99.15782 | 99.25084 |
| 3624 | 93.05617 | 99.74222 | 99.15656 | 99.25029 |
| 3623 | 92.90055 | 99.74322 | 99.1553  | 99.24978 |
| 3622 | 92.7437  | 99.74416 | 99.15405 | 99.24931 |
| 3621 | 92.58581 | 99.74504 | 99.15282 | 99.24888 |
| 3620 | 92.42698 | 99.74586 | 99.15159 | 99.24848 |
| 3619 | 92.26724 | 99.74661 | 99.15038 | 99.24813 |
| 3618 | 92.10656 | 99.7473  | 99.14918 | 99.24782 |
| 3617 | 91.94483 | 99.74794 | 99.148   | 99.24754 |
| 3616 | 91.78191 | 99.74851 | 99.14682 | 99.24731 |
| 3615 | 91.61765 | 99.74902 | 99.14566 | 99.24711 |
| 3614 | 91.45185 | 99.74947 | 99.14451 | 99.24696 |
| 3613 | 91.28435 | 99.74986 | 99.14338 | 99.24684 |
| 3612 | 91.11498 | 99.7502  | 99.14226 | 99.24676 |
| 3611 | 90.9436  | 99.75047 | 99.14116 | 99.24672 |
| 3610 | 90.77006 | 99.75068 | 99.14007 | 99.24671 |
| 3609 | 90.59423 | 99.75084 | 99.139   | 99.24675 |
| 3608 | 90.41596 | 99.75093 | 99.13794 | 99.24682 |
| 3607 | 90.23511 | 99.75097 | 99.1369  | 99.24692 |
| 3606 | 90.05156 | 99.75095 | 99.13587 | 99.24707 |
| 3605 | 89.86522 | 99.75087 | 99.13486 | 99.24725 |
| 3604 | 89.67606 | 99.75073 | 99.13387 | 99.24746 |
| 3603 | 89.48409 | 99.75054 | 99.1329  | 99.24771 |
| 3602 | 89.28943 | 99.75029 | 99.13194 | 99.248   |
| 3601 | 89.09221 | 99.74998 | 99.131   | 99.24832 |
| 3600 | 88.89259 | 99.74962 | 99.13008 | 99.24868 |
| 3599 | 88.69074 | 99.7492  | 99.12917 | 99.24907 |
| 3598 | 88.4868  | 99.74872 | 99.12829 | 99.24949 |
| 3597 | 88.28088 | 99.74819 | 99.12742 | 99.24994 |
| 3596 | 88.0731  | 99.74761 | 99.12657 | 99.25043 |
| 3595 | 87.86356 | 99.74697 | 99.12574 | 99.25095 |

|      |          |          |          |          |
|------|----------|----------|----------|----------|
| 3594 | 87.65242 | 99.74628 | 99.12493 | 99.2515  |
| 3593 | 87.43983 | 99.74553 | 99.12414 | 99.25208 |
| 3592 | 87.22599 | 99.74474 | 99.12337 | 99.25269 |
| 3591 | 87.01112 | 99.74388 | 99.12262 | 99.25334 |
| 3590 | 86.79538 | 99.74298 | 99.12188 | 99.25401 |
| 3589 | 86.57894 | 99.74203 | 99.12117 | 99.25471 |
| 3588 | 86.36193 | 99.74102 | 99.12048 | 99.25543 |
| 3587 | 86.14441 | 99.73996 | 99.1198  | 99.25619 |
| 3586 | 85.92644 | 99.73886 | 99.11915 | 99.25697 |
| 3585 | 85.70801 | 99.7377  | 99.11851 | 99.25778 |
| 3584 | 85.48913 | 99.73649 | 99.1179  | 99.25861 |
| 3583 | 85.26978 | 99.73524 | 99.11731 | 99.25947 |
| 3582 | 85.04996 | 99.73393 | 99.11674 | 99.26035 |
| 3581 | 84.82966 | 99.73258 | 99.11618 | 99.26126 |
| 3580 | 84.60886 | 99.73119 | 99.11565 | 99.26219 |
| 3579 | 84.38753 | 99.72974 | 99.11514 | 99.26314 |
| 3578 | 84.16565 | 99.72825 | 99.11465 | 99.26412 |
| 3577 | 83.94322 | 99.72671 | 99.11418 | 99.26511 |
| 3576 | 83.72028 | 99.72513 | 99.11373 | 99.26613 |
| 3575 | 83.4969  | 99.7235  | 99.1133  | 99.26716 |
| 3574 | 83.2732  | 99.72183 | 99.11289 | 99.26822 |
| 3573 | 83.0493  | 99.72012 | 99.1125  | 99.26929 |
| 3572 | 82.82532 | 99.71836 | 99.11213 | 99.27038 |
| 3571 | 82.60138 | 99.71656 | 99.11179 | 99.27149 |
| 3570 | 82.37759 | 99.71472 | 99.11146 | 99.27261 |
| 3569 | 82.15405 | 99.71284 | 99.11115 | 99.27375 |
| 3568 | 81.93087 | 99.71092 | 99.11087 | 99.2749  |
| 3567 | 81.70818 | 99.70896 | 99.1106  | 99.27607 |
| 3566 | 81.48617 | 99.70696 | 99.11035 | 99.27726 |
| 3565 | 81.26507 | 99.70492 | 99.11013 | 99.27845 |
| 3564 | 81.04512 | 99.70284 | 99.10992 | 99.27966 |
| 3563 | 80.82658 | 99.70072 | 99.10973 | 99.28087 |
| 3562 | 80.60967 | 99.69857 | 99.10956 | 99.2821  |
| 3561 | 80.39458 | 99.69638 | 99.10942 | 99.28334 |
| 3560 | 80.18148 | 99.69416 | 99.10929 | 99.28459 |
| 3559 | 79.97045 | 99.6919  | 99.10918 | 99.28584 |
| 3558 | 79.76155 | 99.68961 | 99.10909 | 99.28711 |
| 3557 | 79.55479 | 99.68728 | 99.10902 | 99.28838 |
| 3556 | 79.35014 | 99.68492 | 99.10897 | 99.28965 |
| 3555 | 79.14758 | 99.68253 | 99.10894 | 99.29094 |
| 3554 | 78.9471  | 99.6801  | 99.10892 | 99.29222 |

|      |          |          |          |          |
|------|----------|----------|----------|----------|
| 3553 | 78.74871 | 99.67765 | 99.10892 | 99.29352 |
| 3552 | 78.55245 | 99.67516 | 99.10895 | 99.29481 |
| 3551 | 78.35841 | 99.67265 | 99.10899 | 99.29611 |
| 3550 | 78.1667  | 99.6701  | 99.10905 | 99.29741 |
| 3549 | 77.97742 | 99.66753 | 99.10912 | 99.29871 |
| 3548 | 77.7907  | 99.66493 | 99.10921 | 99.30001 |
| 3547 | 77.6066  | 99.6623  | 99.10933 | 99.30131 |
| 3546 | 77.42515 | 99.65965 | 99.10945 | 99.30261 |
| 3545 | 77.24634 | 99.65697 | 99.1096  | 99.30391 |
| 3544 | 77.07009 | 99.65427 | 99.10976 | 99.3052  |
| 3543 | 76.89633 | 99.65154 | 99.10994 | 99.3065  |
| 3542 | 76.725   | 99.64879 | 99.11013 | 99.30779 |
| 3541 | 76.55603 | 99.64601 | 99.11034 | 99.30907 |
| 3540 | 76.38944 | 99.64321 | 99.11056 | 99.31035 |
| 3539 | 76.22524 | 99.6404  | 99.1108  | 99.31163 |
| 3538 | 76.06351 | 99.63756 | 99.11106 | 99.3129  |
| 3537 | 75.90434 | 99.6347  | 99.11133 | 99.31416 |
| 3536 | 75.74783 | 99.63182 | 99.11162 | 99.31542 |
| 3535 | 75.59407 | 99.62892 | 99.11192 | 99.31666 |
| 3534 | 75.44312 | 99.626   | 99.11223 | 99.3179  |
| 3533 | 75.29503 | 99.62307 | 99.11256 | 99.31913 |
| 3532 | 75.14985 | 99.62012 | 99.1129  | 99.32035 |
| 3531 | 75.00763 | 99.61715 | 99.11325 | 99.32156 |
| 3530 | 74.86841 | 99.61417 | 99.11362 | 99.32276 |
| 3529 | 74.73227 | 99.61117 | 99.114   | 99.32394 |
| 3528 | 74.59929 | 99.60816 | 99.1144  | 99.32512 |
| 3527 | 74.46953 | 99.60514 | 99.1148  | 99.32628 |
| 3526 | 74.34301 | 99.6021  | 99.11522 | 99.32743 |
| 3525 | 74.21969 | 99.59905 | 99.11565 | 99.32857 |
| 3524 | 74.09947 | 99.596   | 99.11609 | 99.32969 |
| 3523 | 73.98218 | 99.59293 | 99.11654 | 99.33079 |
| 3522 | 73.86762 | 99.58985 | 99.117   | 99.33188 |
| 3521 | 73.75555 | 99.58676 | 99.11747 | 99.33296 |
| 3520 | 73.64577 | 99.58366 | 99.11795 | 99.33402 |
| 3519 | 73.53808 | 99.58056 | 99.11845 | 99.33506 |
| 3518 | 73.43234 | 99.57744 | 99.11895 | 99.33609 |
| 3517 | 73.32845 | 99.57433 | 99.11946 | 99.33709 |
| 3516 | 73.22629 | 99.5712  | 99.11998 | 99.33809 |
| 3515 | 73.1258  | 99.56807 | 99.12051 | 99.33906 |
| 3514 | 73.0269  | 99.56494 | 99.12104 | 99.34001 |
| 3513 | 72.92956 | 99.56181 | 99.12159 | 99.34094 |

|      |          |          |          |          |
|------|----------|----------|----------|----------|
| 3512 | 72.83372 | 99.55867 | 99.12214 | 99.34186 |
| 3511 | 72.73937 | 99.55552 | 99.1227  | 99.34275 |
| 3510 | 72.64652 | 99.55238 | 99.12326 | 99.34363 |
| 3509 | 72.55517 | 99.54924 | 99.12384 | 99.34448 |
| 3508 | 72.4653  | 99.54609 | 99.12442 | 99.34532 |
| 3507 | 72.37689 | 99.54295 | 99.125   | 99.34613 |
| 3506 | 72.2899  | 99.53981 | 99.12559 | 99.34692 |
| 3505 | 72.20427 | 99.53666 | 99.12619 | 99.34769 |
| 3504 | 72.11993 | 99.53353 | 99.12679 | 99.34844 |
| 3503 | 72.03686 | 99.53039 | 99.1274  | 99.34916 |
| 3502 | 71.95504 | 99.52726 | 99.12801 | 99.34986 |
| 3501 | 71.87455 | 99.52413 | 99.12862 | 99.35054 |
| 3500 | 71.79549 | 99.52101 | 99.12924 | 99.3512  |
| 3499 | 71.71799 | 99.51789 | 99.12986 | 99.35183 |
| 3498 | 71.64222 | 99.51478 | 99.13049 | 99.35244 |
| 3497 | 71.56831 | 99.51167 | 99.13111 | 99.35303 |
| 3496 | 71.49633 | 99.50858 | 99.13174 | 99.35359 |
| 3495 | 71.4263  | 99.50549 | 99.13238 | 99.35413 |
| 3494 | 71.35814 | 99.50241 | 99.13301 | 99.35465 |
| 3493 | 71.29172 | 99.49934 | 99.13365 | 99.35514 |
| 3492 | 71.22684 | 99.49628 | 99.13429 | 99.35561 |
| 3491 | 71.16329 | 99.49323 | 99.13493 | 99.35605 |
| 3490 | 71.10089 | 99.49019 | 99.13556 | 99.35647 |
| 3489 | 71.03945 | 99.48716 | 99.1362  | 99.35686 |
| 3488 | 70.97882 | 99.48415 | 99.13684 | 99.35723 |
| 3487 | 70.91888 | 99.48114 | 99.13748 | 99.35758 |
| 3486 | 70.85949 | 99.47815 | 99.13812 | 99.3579  |
| 3485 | 70.80056 | 99.47518 | 99.13876 | 99.3582  |
| 3484 | 70.74198 | 99.47222 | 99.1394  | 99.35847 |
| 3483 | 70.68369 | 99.46928 | 99.14004 | 99.35872 |
| 3482 | 70.62568 | 99.46635 | 99.14067 | 99.35894 |
| 3481 | 70.56801 | 99.46343 | 99.1413  | 99.35914 |
| 3480 | 70.51079 | 99.46054 | 99.14193 | 99.35931 |
| 3479 | 70.45418 | 99.45766 | 99.14256 | 99.35946 |
| 3478 | 70.39836 | 99.4548  | 99.14319 | 99.35959 |
| 3477 | 70.34348 | 99.45196 | 99.14381 | 99.35969 |
| 3476 | 70.28968 | 99.44914 | 99.14443 | 99.35977 |
| 3475 | 70.23707 | 99.44633 | 99.14505 | 99.35983 |
| 3474 | 70.18574 | 99.44355 | 99.14566 | 99.35986 |
| 3473 | 70.1358  | 99.44079 | 99.14627 | 99.35986 |
| 3472 | 70.08736 | 99.43805 | 99.14687 | 99.35985 |

|      |          |          |          |          |
|------|----------|----------|----------|----------|
| 3471 | 70.04056 | 99.43533 | 99.14747 | 99.35981 |
| 3470 | 69.99554 | 99.43263 | 99.14806 | 99.35975 |
| 3469 | 69.95242 | 99.42995 | 99.14865 | 99.35966 |
| 3468 | 69.91129 | 99.4273  | 99.14924 | 99.35955 |
| 3467 | 69.87217 | 99.42467 | 99.14982 | 99.35942 |
| 3466 | 69.83509 | 99.42206 | 99.15039 | 99.35927 |
| 3465 | 69.8     | 99.41948 | 99.15096 | 99.3591  |
| 3464 | 69.76687 | 99.41693 | 99.15152 | 99.3589  |
| 3463 | 69.73567 | 99.4144  | 99.15208 | 99.35868 |
| 3462 | 69.70634 | 99.41189 | 99.15263 | 99.35845 |
| 3461 | 69.67883 | 99.40941 | 99.15317 | 99.35819 |
| 3460 | 69.65303 | 99.40696 | 99.1537  | 99.35791 |
| 3459 | 69.62882 | 99.40454 | 99.15423 | 99.35761 |
| 3458 | 69.60603 | 99.40214 | 99.15475 | 99.35729 |
| 3457 | 69.58449 | 99.39977 | 99.15527 | 99.35695 |
| 3456 | 69.564   | 99.39743 | 99.15577 | 99.35659 |
| 3455 | 69.54442 | 99.39511 | 99.15627 | 99.35621 |
| 3454 | 69.5256  | 99.39283 | 99.15676 | 99.35581 |
| 3453 | 69.50749 | 99.39058 | 99.15724 | 99.3554  |
| 3452 | 69.49007 | 99.38835 | 99.15771 | 99.35497 |
| 3451 | 69.47339 | 99.38616 | 99.15818 | 99.35452 |
| 3450 | 69.45759 | 99.38399 | 99.15863 | 99.35405 |
| 3449 | 69.44284 | 99.38186 | 99.15908 | 99.35357 |
| 3448 | 69.42934 | 99.37975 | 99.15952 | 99.35306 |
| 3447 | 69.41734 | 99.37768 | 99.15995 | 99.35255 |
| 3446 | 69.40705 | 99.37564 | 99.16037 | 99.35202 |
| 3445 | 69.39866 | 99.37364 | 99.16078 | 99.35147 |
| 3444 | 69.39232 | 99.37166 | 99.16118 | 99.35091 |
| 3443 | 69.3881  | 99.36972 | 99.16157 | 99.35033 |
| 3442 | 69.38607 | 99.36781 | 99.16195 | 99.34974 |
| 3441 | 69.38623 | 99.36593 | 99.16233 | 99.34914 |
| 3440 | 69.38855 | 99.36409 | 99.16269 | 99.34852 |
| 3439 | 69.39302 | 99.36228 | 99.16304 | 99.3479  |
| 3438 | 69.39959 | 99.36051 | 99.16338 | 99.34725 |
| 3437 | 69.4082  | 99.35877 | 99.16371 | 99.3466  |
| 3436 | 69.41881 | 99.35706 | 99.16404 | 99.34594 |
| 3435 | 69.43136 | 99.35539 | 99.16435 | 99.34527 |
| 3434 | 69.4458  | 99.35376 | 99.16465 | 99.34458 |
| 3433 | 69.46213 | 99.35216 | 99.16494 | 99.34389 |
| 3432 | 69.48033 | 99.35059 | 99.16522 | 99.34319 |
| 3431 | 69.5004  | 99.34906 | 99.16549 | 99.34247 |

|      |          |          |          |          |
|------|----------|----------|----------|----------|
| 3430 | 69.52234 | 99.34757 | 99.16575 | 99.34175 |
| 3429 | 69.54608 | 99.34611 | 99.16599 | 99.34103 |
| 3428 | 69.57156 | 99.34469 | 99.16623 | 99.34029 |
| 3427 | 69.59864 | 99.3433  | 99.16646 | 99.33955 |
| 3426 | 69.6272  | 99.34196 | 99.16667 | 99.3388  |
| 3425 | 69.65713 | 99.34064 | 99.16687 | 99.33805 |
| 3424 | 69.68833 | 99.33937 | 99.16707 | 99.33729 |
| 3423 | 69.72076 | 99.33813 | 99.16725 | 99.33653 |
| 3422 | 69.75444 | 99.33693 | 99.16742 | 99.33576 |
| 3421 | 69.78941 | 99.33577 | 99.16758 | 99.33499 |
| 3420 | 69.82574 | 99.33464 | 99.16773 | 99.33421 |
| 3419 | 69.8635  | 99.33355 | 99.16787 | 99.33343 |
| 3418 | 69.9028  | 99.3325  | 99.168   | 99.33265 |
| 3417 | 69.94375 | 99.33149 | 99.16812 | 99.33187 |
| 3416 | 69.98647 | 99.33052 | 99.16822 | 99.33109 |
| 3415 | 70.03113 | 99.32958 | 99.16832 | 99.3303  |
| 3414 | 70.07785 | 99.32868 | 99.1684  | 99.32952 |
| 3413 | 70.12676 | 99.32782 | 99.16847 | 99.32874 |
| 3412 | 70.17793 | 99.327   | 99.16854 | 99.32795 |
| 3411 | 70.23138 | 99.32621 | 99.16859 | 99.32717 |
| 3410 | 70.28707 | 99.32547 | 99.16863 | 99.32639 |
| 3409 | 70.34491 | 99.32476 | 99.16866 | 99.32561 |
| 3408 | 70.40478 | 99.32409 | 99.16868 | 99.32483 |
| 3407 | 70.46659 | 99.32346 | 99.16869 | 99.32406 |
| 3406 | 70.53024 | 99.32286 | 99.16869 | 99.32329 |
| 3405 | 70.59563 | 99.32231 | 99.16868 | 99.32252 |
| 3404 | 70.66268 | 99.32179 | 99.16865 | 99.32176 |
| 3403 | 70.73127 | 99.32131 | 99.16862 | 99.321   |
| 3402 | 70.80129 | 99.32087 | 99.16858 | 99.32025 |
| 3401 | 70.87261 | 99.32047 | 99.16853 | 99.31951 |
| 3400 | 70.94507 | 99.3201  | 99.16846 | 99.31877 |
| 3399 | 71.01855 | 99.31978 | 99.16839 | 99.31803 |
| 3398 | 71.09296 | 99.31949 | 99.16831 | 99.31731 |
| 3397 | 71.16823 | 99.31924 | 99.16822 | 99.31659 |
| 3396 | 71.24433 | 99.31903 | 99.16811 | 99.31588 |
| 3395 | 71.32129 | 99.31885 | 99.168   | 99.31517 |
| 3394 | 71.39915 | 99.31872 | 99.16788 | 99.31448 |
| 3393 | 71.47799 | 99.31862 | 99.16775 | 99.31379 |
| 3392 | 71.55788 | 99.31856 | 99.16761 | 99.31312 |
| 3391 | 71.63887 | 99.31854 | 99.16746 | 99.31245 |
| 3390 | 71.72101 | 99.31855 | 99.1673  | 99.3118  |

|      |          |          |          |          |
|------|----------|----------|----------|----------|
| 3389 | 71.80429 | 99.3186  | 99.16714 | 99.31115 |
| 3388 | 71.88864 | 99.31869 | 99.16696 | 99.31052 |
| 3387 | 71.974   | 99.31881 | 99.16678 | 99.30989 |
| 3386 | 72.06024 | 99.31898 | 99.16658 | 99.30928 |
| 3385 | 72.14727 | 99.31917 | 99.16638 | 99.30868 |
| 3384 | 72.23499 | 99.31941 | 99.16617 | 99.30809 |
| 3383 | 72.32332 | 99.31968 | 99.16596 | 99.30752 |
| 3382 | 72.41222 | 99.31999 | 99.16573 | 99.30696 |
| 3381 | 72.50161 | 99.32033 | 99.1655  | 99.30641 |
| 3380 | 72.59142 | 99.32071 | 99.16526 | 99.30587 |
| 3379 | 72.68155 | 99.32113 | 99.16501 | 99.30535 |
| 3378 | 72.77186 | 99.32158 | 99.16476 | 99.30484 |
| 3377 | 72.86221 | 99.32207 | 99.16449 | 99.30435 |
| 3376 | 72.95248 | 99.32259 | 99.16423 | 99.30387 |
| 3375 | 73.04253 | 99.32314 | 99.16395 | 99.3034  |
| 3374 | 73.1323  | 99.32374 | 99.16367 | 99.30296 |
| 3373 | 73.22171 | 99.32436 | 99.16338 | 99.30252 |
| 3372 | 73.31072 | 99.32502 | 99.16308 | 99.3021  |
| 3371 | 73.39929 | 99.32571 | 99.16278 | 99.3017  |
| 3370 | 73.4874  | 99.32644 | 99.16247 | 99.30131 |
| 3369 | 73.57504 | 99.3272  | 99.16216 | 99.30094 |
| 3368 | 73.66222 | 99.328   | 99.16184 | 99.30059 |
| 3367 | 73.74895 | 99.32882 | 99.16152 | 99.30025 |
| 3366 | 73.83527 | 99.32968 | 99.16119 | 99.29992 |
| 3365 | 73.92125 | 99.33058 | 99.16085 | 99.29962 |
| 3364 | 74.0069  | 99.3315  | 99.16051 | 99.29933 |
| 3363 | 74.09224 | 99.33246 | 99.16017 | 99.29906 |
| 3362 | 74.17724 | 99.33344 | 99.15982 | 99.2988  |
| 3361 | 74.26186 | 99.33446 | 99.15947 | 99.29856 |
| 3360 | 74.34604 | 99.33551 | 99.15911 | 99.29834 |
| 3359 | 74.42974 | 99.33659 | 99.15875 | 99.29814 |
| 3358 | 74.51298 | 99.3377  | 99.15838 | 99.29795 |
| 3357 | 74.59581 | 99.33885 | 99.15801 | 99.29778 |
| 3356 | 74.67833 | 99.34002 | 99.15764 | 99.29763 |
| 3355 | 74.76067 | 99.34122 | 99.15727 | 99.2975  |
| 3354 | 74.84299 | 99.34245 | 99.15689 | 99.29738 |
| 3353 | 74.92543 | 99.3437  | 99.15651 | 99.29728 |
| 3352 | 75.00807 | 99.34499 | 99.15612 | 99.2972  |
| 3351 | 75.09092 | 99.3463  | 99.15574 | 99.29714 |
| 3350 | 75.17393 | 99.34765 | 99.15535 | 99.29709 |
| 3349 | 75.25693 | 99.34902 | 99.15496 | 99.29706 |



|      |          |          |          |          |
|------|----------|----------|----------|----------|
| 3348 | 75.33968 | 99.35041 | 99.15457 | 99.29705 |
| 3347 | 75.4219  | 99.35183 | 99.15417 | 99.29706 |
| 3346 | 75.50334 | 99.35328 | 99.15378 | 99.29708 |
| 3345 | 75.58376 | 99.35476 | 99.15338 | 99.29712 |
| 3344 | 75.66301 | 99.35626 | 99.15298 | 99.29718 |
| 3343 | 75.74106 | 99.35779 | 99.15258 | 99.29726 |
| 3342 | 75.81795 | 99.35934 | 99.15218 | 99.29735 |
| 3341 | 75.89378 | 99.36091 | 99.15179 | 99.29746 |
| 3340 | 75.96869 | 99.36251 | 99.15138 | 99.29758 |
| 3339 | 76.04285 | 99.36413 | 99.15098 | 99.29773 |
| 3338 | 76.1164  | 99.36578 | 99.15058 | 99.29788 |
| 3337 | 76.18949 | 99.36744 | 99.15018 | 99.29806 |
| 3336 | 76.26225 | 99.36913 | 99.14979 | 99.29825 |
| 3335 | 76.33484 | 99.37085 | 99.14939 | 99.29846 |
| 3334 | 76.40738 | 99.37258 | 99.14899 | 99.29868 |
| 3333 | 76.48001 | 99.37434 | 99.14859 | 99.29892 |
| 3332 | 76.55277 | 99.37611 | 99.1482  | 99.29918 |
| 3331 | 76.62567 | 99.37791 | 99.1478  | 99.29945 |
| 3330 | 76.69864 | 99.37972 | 99.14741 | 99.29974 |
| 3329 | 76.77153 | 99.38156 | 99.14702 | 99.30004 |
| 3328 | 76.84417 | 99.38341 | 99.14663 | 99.30035 |
| 3327 | 76.91638 | 99.38528 | 99.14624 | 99.30068 |
| 3326 | 76.98802 | 99.38718 | 99.14585 | 99.30103 |
| 3325 | 77.059   | 99.38908 | 99.14547 | 99.30138 |
| 3324 | 77.12929 | 99.39101 | 99.14509 | 99.30176 |
| 3323 | 77.1989  | 99.39295 | 99.14471 | 99.30214 |
| 3322 | 77.26791 | 99.39491 | 99.14434 | 99.30254 |
| 3321 | 77.33642 | 99.39689 | 99.14397 | 99.30295 |
| 3320 | 77.40453 | 99.39888 | 99.1436  | 99.30337 |
| 3319 | 77.47237 | 99.40088 | 99.14324 | 99.30381 |
| 3318 | 77.54003 | 99.4029  | 99.14287 | 99.30426 |
| 3317 | 77.60758 | 99.40494 | 99.14252 | 99.30472 |
| 3316 | 77.67506 | 99.40698 | 99.14216 | 99.30519 |
| 3315 | 77.74245 | 99.40904 | 99.14181 | 99.30568 |
| 3314 | 77.80964 | 99.41112 | 99.14147 | 99.30617 |
| 3313 | 77.8765  | 99.4132  | 99.14113 | 99.30667 |
| 3312 | 77.9428  | 99.4153  | 99.14079 | 99.30719 |
| 3311 | 78.00832 | 99.41741 | 99.14046 | 99.30771 |
| 3310 | 78.07278 | 99.41953 | 99.14013 | 99.30825 |
| 3309 | 78.13596 | 99.42166 | 99.13981 | 99.30879 |
| 3308 | 78.19767 | 99.4238  | 99.13949 | 99.30934 |

|      |          |          |          |          |
|------|----------|----------|----------|----------|
| 3307 | 78.25783 | 99.42595 | 99.13918 | 99.3099  |
| 3306 | 78.31651 | 99.42811 | 99.13888 | 99.31047 |
| 3305 | 78.37389 | 99.43028 | 99.13857 | 99.31104 |
| 3304 | 78.43028 | 99.43246 | 99.13828 | 99.31163 |
| 3303 | 78.4861  | 99.43464 | 99.13799 | 99.31222 |
| 3302 | 78.54177 | 99.43683 | 99.1377  | 99.31281 |
| 3301 | 78.59769 | 99.43903 | 99.13743 | 99.31342 |
| 3300 | 78.65418 | 99.44123 | 99.13715 | 99.31403 |
| 3299 | 78.71141 | 99.44344 | 99.13689 | 99.31464 |
| 3298 | 78.76946 | 99.44566 | 99.13663 | 99.31526 |
| 3297 | 78.82832 | 99.44788 | 99.13637 | 99.31588 |
| 3296 | 78.88792 | 99.4501  | 99.13613 | 99.31651 |
| 3295 | 78.94818 | 99.45233 | 99.13589 | 99.31714 |
| 3294 | 79.00906 | 99.45456 | 99.13565 | 99.31778 |
| 3293 | 79.07052 | 99.4568  | 99.13542 | 99.31842 |
| 3292 | 79.13256 | 99.45904 | 99.1352  | 99.31906 |
| 3291 | 79.19518 | 99.46128 | 99.13499 | 99.3197  |
| 3290 | 79.25838 | 99.46352 | 99.13478 | 99.32035 |
| 3289 | 79.32216 | 99.46576 | 99.13458 | 99.32099 |
| 3288 | 79.38654 | 99.468   | 99.13439 | 99.32164 |
| 3287 | 79.45159 | 99.47025 | 99.13421 | 99.32229 |
| 3286 | 79.51739 | 99.47249 | 99.13403 | 99.32294 |
| 3285 | 79.5841  | 99.47473 | 99.13386 | 99.32359 |
| 3284 | 79.65189 | 99.47698 | 99.13369 | 99.32423 |
| 3283 | 79.72096 | 99.47922 | 99.13354 | 99.32488 |
| 3282 | 79.79148 | 99.48145 | 99.13339 | 99.32553 |
| 3281 | 79.8636  | 99.48369 | 99.13325 | 99.32617 |
| 3280 | 79.93743 | 99.48592 | 99.13312 | 99.32681 |
| 3279 | 80.01302 | 99.48815 | 99.13299 | 99.32745 |
| 3278 | 80.09034 | 99.49038 | 99.13287 | 99.32809 |
| 3277 | 80.1693  | 99.4926  | 99.13276 | 99.32872 |
| 3276 | 80.24977 | 99.49482 | 99.13266 | 99.32935 |
| 3275 | 80.33153 | 99.49703 | 99.13257 | 99.32998 |
| 3274 | 80.41439 | 99.49924 | 99.13248 | 99.3306  |
| 3273 | 80.49817 | 99.50144 | 99.1324  | 99.33122 |
| 3272 | 80.58274 | 99.50363 | 99.13233 | 99.33183 |
| 3271 | 80.66807 | 99.50582 | 99.13227 | 99.33244 |
| 3270 | 80.75427 | 99.508   | 99.13221 | 99.33304 |
| 3269 | 80.84151 | 99.51018 | 99.13217 | 99.33363 |
| 3268 | 80.93006 | 99.51234 | 99.13213 | 99.33422 |
| 3267 | 81.02021 | 99.5145  | 99.1321  | 99.3348  |

|      |          |          |          |          |
|------|----------|----------|----------|----------|
| 3266 | 81.11226 | 99.51665 | 99.13207 | 99.33537 |
| 3265 | 81.20643 | 99.51879 | 99.13206 | 99.33594 |
| 3264 | 81.3029  | 99.52092 | 99.13205 | 99.3365  |
| 3263 | 81.40171 | 99.52303 | 99.13205 | 99.33705 |
| 3262 | 81.50283 | 99.52514 | 99.13206 | 99.33759 |
| 3261 | 81.60607 | 99.52724 | 99.13208 | 99.33812 |
| 3260 | 81.71121 | 99.52933 | 99.1321  | 99.33865 |
| 3259 | 81.81792 | 99.5314  | 99.13213 | 99.33916 |
| 3258 | 81.92589 | 99.53347 | 99.13218 | 99.33966 |
| 3257 | 82.03484 | 99.53552 | 99.13222 | 99.34016 |
| 3256 | 82.14455 | 99.53756 | 99.13228 | 99.34064 |
| 3255 | 82.2549  | 99.53958 | 99.13234 | 99.34111 |
| 3254 | 82.36584 | 99.54159 | 99.13241 | 99.34158 |
| 3253 | 82.47736 | 99.54359 | 99.13249 | 99.34203 |
| 3252 | 82.58947 | 99.54557 | 99.13258 | 99.34247 |
| 3251 | 82.70213 | 99.54754 | 99.13267 | 99.34289 |
| 3250 | 82.81524 | 99.54949 | 99.13278 | 99.34331 |
| 3249 | 82.92866 | 99.55143 | 99.13289 | 99.34371 |
| 3248 | 83.04222 | 99.55336 | 99.133   | 99.3441  |
| 3247 | 83.15578 | 99.55526 | 99.13313 | 99.34448 |
| 3246 | 83.26925 | 99.55715 | 99.13326 | 99.34485 |
| 3245 | 83.38266 | 99.55903 | 99.1334  | 99.3452  |
| 3244 | 83.49608 | 99.56089 | 99.13354 | 99.34554 |
| 3243 | 83.60969 | 99.56273 | 99.1337  | 99.34587 |
| 3242 | 83.72369 | 99.56455 | 99.13386 | 99.34618 |
| 3241 | 83.83827 | 99.56635 | 99.13402 | 99.34648 |
| 3240 | 83.95358 | 99.56814 | 99.1342  | 99.34676 |
| 3239 | 84.06969 | 99.56991 | 99.13438 | 99.34703 |
| 3238 | 84.18655 | 99.57165 | 99.13457 | 99.34729 |
| 3237 | 84.30408 | 99.57338 | 99.13476 | 99.34753 |
| 3236 | 84.42209 | 99.57509 | 99.13496 | 99.34776 |
| 3235 | 84.54038 | 99.57678 | 99.13517 | 99.34797 |
| 3234 | 84.65879 | 99.57846 | 99.13538 | 99.34817 |
| 3233 | 84.77723 | 99.58011 | 99.1356  | 99.34835 |
| 3232 | 84.89569 | 99.58174 | 99.13583 | 99.34852 |
| 3231 | 85.0143  | 99.58334 | 99.13606 | 99.34868 |
| 3230 | 85.13326 | 99.58493 | 99.1363  | 99.34881 |
| 3229 | 85.25277 | 99.5865  | 99.13654 | 99.34894 |
| 3228 | 85.37302 | 99.58804 | 99.13679 | 99.34905 |
| 3227 | 85.49408 | 99.58957 | 99.13705 | 99.34914 |
| 3226 | 85.61592 | 99.59107 | 99.13731 | 99.34922 |

|      |          |          |          |          |
|------|----------|----------|----------|----------|
| 3225 | 85.73841 | 99.59255 | 99.13758 | 99.34928 |
| 3224 | 85.86133 | 99.594   | 99.13785 | 99.34933 |
| 3223 | 85.98447 | 99.59544 | 99.13813 | 99.34936 |
| 3222 | 86.10762 | 99.59685 | 99.13841 | 99.34938 |
| 3221 | 86.23067 | 99.59824 | 99.1387  | 99.34938 |
| 3220 | 86.35358 | 99.5996  | 99.13899 | 99.34936 |
| 3219 | 86.47637 | 99.60094 | 99.13929 | 99.34933 |
| 3218 | 86.59912 | 99.60226 | 99.13959 | 99.34929 |
| 3217 | 86.72196 | 99.60355 | 99.1399  | 99.34923 |
| 3216 | 86.84501 | 99.60482 | 99.14021 | 99.34916 |
| 3215 | 86.96836 | 99.60607 | 99.14053 | 99.34907 |
| 3214 | 87.09208 | 99.60729 | 99.14085 | 99.34896 |
| 3213 | 87.21618 | 99.60848 | 99.14117 | 99.34885 |
| 3212 | 87.3406  | 99.60965 | 99.1415  | 99.34871 |
| 3211 | 87.46522 | 99.6108  | 99.14183 | 99.34856 |
| 3210 | 87.58989 | 99.61192 | 99.14216 | 99.3484  |
| 3209 | 87.71445 | 99.61302 | 99.1425  | 99.34822 |
| 3208 | 87.83884 | 99.61409 | 99.14284 | 99.34803 |
| 3207 | 87.96304 | 99.61513 | 99.14319 | 99.34783 |
| 3206 | 88.08718 | 99.61615 | 99.14354 | 99.34761 |
| 3205 | 88.21145 | 99.61714 | 99.14389 | 99.34738 |
| 3204 | 88.3361  | 99.61811 | 99.14424 | 99.34713 |
| 3203 | 88.46134 | 99.61905 | 99.1446  | 99.34687 |
| 3202 | 88.58731 | 99.61997 | 99.14496 | 99.3466  |
| 3201 | 88.71402 | 99.62085 | 99.14532 | 99.34631 |
| 3200 | 88.84132 | 99.62172 | 99.14568 | 99.34601 |
| 3199 | 88.96895 | 99.62255 | 99.14605 | 99.3457  |
| 3198 | 89.09652 | 99.62336 | 99.14642 | 99.34538 |
| 3197 | 89.22363 | 99.62415 | 99.14679 | 99.34504 |
| 3196 | 89.3499  | 99.6249  | 99.14716 | 99.3447  |
| 3195 | 89.475   | 99.62563 | 99.14753 | 99.34434 |
| 3194 | 89.59875 | 99.62634 | 99.14791 | 99.34397 |
| 3193 | 89.72106 | 99.62701 | 99.14828 | 99.34359 |
| 3192 | 89.84198 | 99.62766 | 99.14866 | 99.34319 |
| 3191 | 89.9616  | 99.62829 | 99.14904 | 99.34279 |
| 3190 | 90.08008 | 99.62888 | 99.14942 | 99.34238 |
| 3189 | 90.19755 | 99.62945 | 99.1498  | 99.34196 |
| 3188 | 90.31406 | 99.62999 | 99.15018 | 99.34152 |
| 3187 | 90.4296  | 99.63051 | 99.15056 | 99.34108 |
| 3186 | 90.54412 | 99.631   | 99.15094 | 99.34063 |
| 3185 | 90.65753 | 99.63146 | 99.15132 | 99.34017 |

|      |          |          |          |          |
|------|----------|----------|----------|----------|
| 3184 | 90.76981 | 99.63189 | 99.1517  | 99.3397  |
| 3183 | 90.88098 | 99.6323  | 99.15208 | 99.33923 |
| 3182 | 90.99119 | 99.63268 | 99.15247 | 99.33874 |
| 3181 | 91.1006  | 99.63303 | 99.15285 | 99.33825 |
| 3180 | 91.20945 | 99.63336 | 99.15323 | 99.33775 |
| 3179 | 91.31791 | 99.63366 | 99.15361 | 99.33725 |
| 3178 | 91.42609 | 99.63393 | 99.15398 | 99.33674 |
| 3177 | 91.53397 | 99.63418 | 99.15436 | 99.33622 |
| 3176 | 91.64148 | 99.6344  | 99.15474 | 99.3357  |
| 3175 | 91.74846 | 99.63459 | 99.15512 | 99.33517 |
| 3174 | 91.85473 | 99.63475 | 99.15549 | 99.33464 |
| 3173 | 91.96013 | 99.63489 | 99.15586 | 99.3341  |
| 3172 | 92.06454 | 99.63501 | 99.15623 | 99.33356 |
| 3171 | 92.16793 | 99.63509 | 99.1566  | 99.33301 |
| 3170 | 92.2703  | 99.63515 | 99.15697 | 99.33247 |
| 3169 | 92.37176 | 99.63519 | 99.15734 | 99.33191 |
| 3168 | 92.47248 | 99.63519 | 99.1577  | 99.33136 |
| 3167 | 92.57266 | 99.63518 | 99.15806 | 99.3308  |
| 3166 | 92.6725  | 99.63513 | 99.15842 | 99.33025 |
| 3165 | 92.77219 | 99.63506 | 99.15878 | 99.32969 |
| 3164 | 92.87182 | 99.63497 | 99.15913 | 99.32913 |
| 3163 | 92.97135 | 99.63484 | 99.15948 | 99.32857 |
| 3162 | 93.07062 | 99.6347  | 99.15983 | 99.32801 |
| 3161 | 93.16938 | 99.63452 | 99.16018 | 99.32745 |
| 3160 | 93.2673  | 99.63433 | 99.16052 | 99.32689 |
| 3159 | 93.36406 | 99.6341  | 99.16086 | 99.32633 |
| 3158 | 93.4594  | 99.63386 | 99.1612  | 99.32578 |
| 3157 | 93.55318 | 99.63358 | 99.16153 | 99.32522 |
| 3156 | 93.64534 | 99.63329 | 99.16186 | 99.32467 |
| 3155 | 93.73599 | 99.63296 | 99.16219 | 99.32412 |
| 3154 | 93.82531 | 99.63262 | 99.16251 | 99.32358 |
| 3153 | 93.91355 | 99.63225 | 99.16283 | 99.32304 |
| 3152 | 94.00104 | 99.63185 | 99.16315 | 99.3225  |
| 3151 | 94.08804 | 99.63144 | 99.16346 | 99.32197 |
| 3150 | 94.17483 | 99.63099 | 99.16377 | 99.32144 |
| 3149 | 94.26159 | 99.63053 | 99.16407 | 99.32092 |
| 3148 | 94.34841 | 99.63004 | 99.16437 | 99.3204  |
| 3147 | 94.43528 | 99.62953 | 99.16466 | 99.31989 |
| 3146 | 94.52212 | 99.629   | 99.16495 | 99.31939 |
| 3145 | 94.60878 | 99.62844 | 99.16524 | 99.31889 |
| 3144 | 94.69512 | 99.62786 | 99.16552 | 99.31841 |

|      |          |          |          |          |
|------|----------|----------|----------|----------|
| 3143 | 94.78102 | 99.62726 | 99.1658  | 99.31793 |
| 3142 | 94.86637 | 99.62664 | 99.16607 | 99.31745 |
| 3141 | 94.95111 | 99.62599 | 99.16634 | 99.31699 |
| 3140 | 95.03518 | 99.62532 | 99.1666  | 99.31654 |
| 3139 | 95.1185  | 99.62464 | 99.16686 | 99.31609 |
| 3138 | 95.20098 | 99.62393 | 99.16711 | 99.31566 |
| 3137 | 95.28248 | 99.6232  | 99.16736 | 99.31523 |
| 3136 | 95.3629  | 99.62245 | 99.16761 | 99.31482 |
| 3135 | 95.44214 | 99.62168 | 99.16785 | 99.31441 |
| 3134 | 95.52019 | 99.62089 | 99.16808 | 99.31402 |
| 3133 | 95.59711 | 99.62008 | 99.16831 | 99.31364 |
| 3132 | 95.673   | 99.61925 | 99.16853 | 99.31328 |
| 3131 | 95.74799 | 99.6184  | 99.16875 | 99.31292 |
| 3130 | 95.82225 | 99.61753 | 99.16896 | 99.31258 |
| 3129 | 95.89586 | 99.61664 | 99.16917 | 99.31225 |
| 3128 | 95.96891 | 99.61574 | 99.16937 | 99.31194 |
| 3127 | 96.04139 | 99.61481 | 99.16956 | 99.31164 |
| 3126 | 96.11325 | 99.61387 | 99.16975 | 99.31135 |
| 3125 | 96.18437 | 99.61291 | 99.16994 | 99.31108 |
| 3124 | 96.25456 | 99.61194 | 99.17012 | 99.31082 |
| 3123 | 96.32361 | 99.61095 | 99.17029 | 99.31058 |
| 3122 | 96.39128 | 99.60994 | 99.17046 | 99.31036 |
| 3121 | 96.45738 | 99.60891 | 99.17063 | 99.31015 |
| 3120 | 96.5218  | 99.60787 | 99.17078 | 99.30995 |
| 3119 | 96.58458 | 99.60681 | 99.17093 | 99.30978 |
| 3118 | 96.6459  | 99.60574 | 99.17108 | 99.30962 |
| 3117 | 96.70607 | 99.60465 | 99.17122 | 99.30948 |
| 3116 | 96.76547 | 99.60354 | 99.17136 | 99.30935 |
| 3115 | 96.82451 | 99.60243 | 99.17149 | 99.30924 |
| 3114 | 96.88353 | 99.60129 | 99.17161 | 99.30915 |
| 3113 | 96.94276 | 99.60015 | 99.17173 | 99.30908 |
| 3112 | 97.00231 | 99.59899 | 99.17184 | 99.30903 |
| 3111 | 97.06216 | 99.59781 | 99.17195 | 99.30899 |
| 3110 | 97.12217 | 99.59663 | 99.17205 | 99.30898 |
| 3109 | 97.18215 | 99.59543 | 99.17215 | 99.30898 |
| 3108 | 97.24183 | 99.59422 | 99.17224 | 99.309   |
| 3107 | 97.30095 | 99.593   | 99.17232 | 99.30905 |
| 3106 | 97.35926 | 99.59176 | 99.1724  | 99.30911 |
| 3105 | 97.41657 | 99.59052 | 99.17247 | 99.30919 |
| 3104 | 97.47276 | 99.58926 | 99.17254 | 99.30929 |
| 3103 | 97.52779 | 99.58799 | 99.17261 | 99.30941 |

|      |          |          |          |          |
|------|----------|----------|----------|----------|
| 3102 | 97.58173 | 99.58671 | 99.17266 | 99.30956 |
| 3101 | 97.63472 | 99.58543 | 99.17272 | 99.30972 |
| 3100 | 97.68696 | 99.58413 | 99.17276 | 99.3099  |
| 3099 | 97.73861 | 99.58282 | 99.17281 | 99.31011 |
| 3098 | 97.78984 | 99.58151 | 99.17284 | 99.31033 |
| 3097 | 97.84075 | 99.58019 | 99.17287 | 99.31058 |
| 3096 | 97.89138 | 99.57886 | 99.1729  | 99.31085 |
| 3095 | 97.94174 | 99.57752 | 99.17292 | 99.31113 |
| 3094 | 97.99179 | 99.57617 | 99.17294 | 99.31144 |
| 3093 | 98.04147 | 99.57482 | 99.17295 | 99.31178 |
| 3092 | 98.0907  | 99.57346 | 99.17296 | 99.31213 |
| 3091 | 98.13935 | 99.57209 | 99.17296 | 99.3125  |
| 3090 | 98.1873  | 99.57072 | 99.17295 | 99.3129  |
| 3089 | 98.23441 | 99.56934 | 99.17295 | 99.31331 |
| 3088 | 98.28056 | 99.56796 | 99.17293 | 99.31375 |
| 3087 | 98.32569 | 99.56657 | 99.17292 | 99.31421 |
| 3086 | 98.36977 | 99.56518 | 99.1729  | 99.31469 |
| 3085 | 98.41286 | 99.56378 | 99.17287 | 99.3152  |
| 3084 | 98.45506 | 99.56238 | 99.17284 | 99.31572 |
| 3083 | 98.49648 | 99.56097 | 99.17281 | 99.31627 |
| 3082 | 98.53728 | 99.55957 | 99.17277 | 99.31684 |
| 3081 | 98.57761 | 99.55816 | 99.17272 | 99.31743 |
| 3080 | 98.61766 | 99.55675 | 99.17268 | 99.31804 |
| 3079 | 98.65766 | 99.55533 | 99.17263 | 99.31867 |
| 3078 | 98.69785 | 99.55392 | 99.17257 | 99.31932 |
| 3077 | 98.73847 | 99.5525  | 99.17252 | 99.31999 |
| 3076 | 98.77969 | 99.55108 | 99.17245 | 99.32069 |
| 3075 | 98.82156 | 99.54966 | 99.17239 | 99.3214  |
| 3074 | 98.86397 | 99.54824 | 99.17232 | 99.32214 |
| 3073 | 98.90666 | 99.54683 | 99.17225 | 99.3229  |
| 3072 | 98.94922 | 99.54541 | 99.17217 | 99.32368 |
| 3071 | 98.99119 | 99.54399 | 99.17209 | 99.32447 |
| 3070 | 99.03214 | 99.54258 | 99.17201 | 99.32529 |
| 3069 | 99.07171 | 99.54116 | 99.17193 | 99.32613 |
| 3068 | 99.10968 | 99.53975 | 99.17184 | 99.32699 |
| 3067 | 99.14598 | 99.53834 | 99.17175 | 99.32787 |
| 3066 | 99.18067 | 99.53693 | 99.17166 | 99.32876 |
| 3065 | 99.2139  | 99.53553 | 99.17156 | 99.32968 |
| 3064 | 99.24591 | 99.53413 | 99.17147 | 99.33062 |
| 3063 | 99.27692 | 99.53273 | 99.17137 | 99.33157 |
| 3062 | 99.30718 | 99.53134 | 99.17127 | 99.33254 |

|      |          |          |          |          |
|------|----------|----------|----------|----------|
| 3061 | 99.33687 | 99.52995 | 99.17116 | 99.33354 |
| 3060 | 99.36612 | 99.52857 | 99.17106 | 99.33455 |
| 3059 | 99.39495 | 99.52719 | 99.17095 | 99.33557 |
| 3058 | 99.4233  | 99.52582 | 99.17084 | 99.33662 |
| 3057 | 99.45097 | 99.52446 | 99.17073 | 99.33768 |
| 3056 | 99.4777  | 99.5231  | 99.17062 | 99.33876 |
| 3055 | 99.50317 | 99.52174 | 99.1705  | 99.33986 |
| 3054 | 99.52703 | 99.5204  | 99.17039 | 99.34097 |
| 3053 | 99.54893 | 99.51906 | 99.17028 | 99.3421  |
| 3052 | 99.56852 | 99.51772 | 99.17016 | 99.34324 |
| 3051 | 99.58548 | 99.5164  | 99.17004 | 99.3444  |
| 3050 | 99.59951 | 99.51508 | 99.16992 | 99.34558 |
| 3049 | 99.61033 | 99.51378 | 99.16981 | 99.34677 |
| 3048 | 99.6179  | 99.51248 | 99.16969 | 99.34797 |
| 3047 | 99.62166 | 99.51119 | 99.16957 | 99.34919 |
| 3046 | 99.6216  | 99.50991 | 99.16945 | 99.35042 |
| 3045 | 99.61759 | 99.50864 | 99.16933 | 99.35167 |
| 3044 | 99.60941 | 99.50738 | 99.16921 | 99.35292 |
| 3043 | 99.59681 | 99.50613 | 99.16909 | 99.35419 |
| 3042 | 99.57937 | 99.5049  | 99.16898 | 99.35548 |
| 3041 | 99.55663 | 99.50367 | 99.16886 | 99.35677 |
| 3040 | 99.52798 | 99.50245 | 99.16874 | 99.35808 |
| 3039 | 99.49282 | 99.50125 | 99.16862 | 99.3594  |
| 3038 | 99.45053 | 99.50006 | 99.16851 | 99.36073 |
| 3037 | 99.40051 | 99.49888 | 99.1684  | 99.36206 |
| 3036 | 99.34223 | 99.49771 | 99.16828 | 99.36341 |
| 3035 | 99.27515 | 99.49656 | 99.16817 | 99.36477 |
| 3034 | 99.19877 | 99.49542 | 99.16806 | 99.36614 |
| 3033 | 99.11259 | 99.49429 | 99.16795 | 99.36751 |
| 3032 | 99.01615 | 99.49318 | 99.16785 | 99.36889 |
| 3031 | 98.90908 | 99.49208 | 99.16774 | 99.37028 |
| 3030 | 98.7911  | 99.49099 | 99.16764 | 99.37168 |
| 3029 | 98.66206 | 99.48992 | 99.16754 | 99.37309 |
| 3028 | 98.52193 | 99.48887 | 99.16744 | 99.3745  |
| 3027 | 98.37079 | 99.48783 | 99.16734 | 99.37591 |
| 3026 | 98.20872 | 99.4868  | 99.16725 | 99.37733 |
| 3025 | 98.0358  | 99.48579 | 99.16716 | 99.37876 |
| 3024 | 97.85202 | 99.4848  | 99.16707 | 99.38019 |
| 3023 | 97.65732 | 99.48382 | 99.16698 | 99.38163 |
| 3022 | 97.45154 | 99.48286 | 99.1669  | 99.38306 |
| 3021 | 97.23444 | 99.48192 | 99.16682 | 99.38451 |



|      |          |          |          |          |
|------|----------|----------|----------|----------|
| 3020 | 97.00575 | 99.48099 | 99.16675 | 99.38595 |
| 3019 | 96.76516 | 99.48008 | 99.16667 | 99.38739 |
| 3018 | 96.5124  | 99.47918 | 99.16661 | 99.38884 |
| 3017 | 96.24719 | 99.47831 | 99.16654 | 99.39029 |
| 3016 | 95.96934 | 99.47745 | 99.16648 | 99.39174 |
| 3015 | 95.67874 | 99.47661 | 99.16642 | 99.39319 |
| 3014 | 95.37539 | 99.47579 | 99.16637 | 99.39464 |
| 3013 | 95.0594  | 99.47499 | 99.16632 | 99.39608 |
| 3012 | 94.73099 | 99.4742  | 99.16627 | 99.39753 |
| 3011 | 94.39042 | 99.47344 | 99.16623 | 99.39897 |
| 3010 | 94.03803 | 99.47269 | 99.1662  | 99.40042 |
| 3009 | 93.67412 | 99.47197 | 99.16616 | 99.40185 |
| 3008 | 93.29901 | 99.47126 | 99.16614 | 99.40329 |
| 3007 | 92.91302 | 99.47057 | 99.16611 | 99.40472 |
| 3006 | 92.51647 | 99.4699  | 99.1661  | 99.40615 |
| 3005 | 92.10971 | 99.46925 | 99.16608 | 99.40757 |
| 3004 | 91.69314 | 99.46863 | 99.16608 | 99.40899 |
| 3003 | 91.26715 | 99.46802 | 99.16607 | 99.4104  |
| 3002 | 90.83222 | 99.46743 | 99.16608 | 99.41181 |
| 3001 | 90.38883 | 99.46686 | 99.16609 | 99.41321 |
| 3000 | 89.93753 | 99.46632 | 99.1661  | 99.4146  |
| 2999 | 89.47892 | 99.46579 | 99.16612 | 99.41598 |
| 2998 | 89.01366 | 99.46529 | 99.16615 | 99.41736 |
| 2997 | 88.54249 | 99.46481 | 99.16618 | 99.41873 |
| 2996 | 88.06618 | 99.46435 | 99.16622 | 99.42009 |
| 2995 | 87.58555 | 99.46391 | 99.16626 | 99.42144 |
| 2994 | 87.10143 | 99.46349 | 99.16631 | 99.42277 |
| 2993 | 86.61463 | 99.46309 | 99.16636 | 99.4241  |
| 2992 | 86.12595 | 99.46272 | 99.16643 | 99.42542 |
| 2991 | 85.63618 | 99.46236 | 99.16649 | 99.42673 |
| 2990 | 85.1461  | 99.46203 | 99.16657 | 99.42802 |
| 2989 | 84.6565  | 99.46173 | 99.16665 | 99.42931 |
| 2988 | 84.16815 | 99.46144 | 99.16674 | 99.43058 |
| 2987 | 83.68182 | 99.46118 | 99.16683 | 99.43184 |
| 2986 | 83.19825 | 99.46094 | 99.16693 | 99.43308 |
| 2985 | 82.71809 | 99.46072 | 99.16704 | 99.43431 |
| 2984 | 82.24196 | 99.46052 | 99.16715 | 99.43553 |
| 2983 | 81.7704  | 99.46035 | 99.16727 | 99.43673 |
| 2982 | 81.30392 | 99.4602  | 99.1674  | 99.43792 |
| 2981 | 80.84299 | 99.46007 | 99.16754 | 99.43909 |
| 2980 | 80.38804 | 99.45996 | 99.16768 | 99.44024 |

|      |          |          |          |          |
|------|----------|----------|----------|----------|
| 2979 | 79.93951 | 99.45988 | 99.16783 | 99.44138 |
| 2978 | 79.49784 | 99.45982 | 99.16799 | 99.44251 |
| 2977 | 79.06346 | 99.45979 | 99.16815 | 99.44361 |
| 2976 | 78.63676 | 99.45977 | 99.16832 | 99.4447  |
| 2975 | 78.21814 | 99.45978 | 99.1685  | 99.44577 |
| 2974 | 77.80794 | 99.45982 | 99.16869 | 99.44683 |
| 2973 | 77.40647 | 99.45987 | 99.16888 | 99.44786 |
| 2972 | 77.01397 | 99.45995 | 99.16908 | 99.44888 |
| 2971 | 76.63063 | 99.46006 | 99.16929 | 99.44988 |
| 2970 | 76.25656 | 99.46018 | 99.1695  | 99.45086 |
| 2969 | 75.89182 | 99.46033 | 99.16973 | 99.45181 |
| 2968 | 75.53645 | 99.46051 | 99.16996 | 99.45275 |
| 2967 | 75.1905  | 99.4607  | 99.17019 | 99.45367 |
| 2966 | 74.85408 | 99.46092 | 99.17044 | 99.45457 |
| 2965 | 74.52736 | 99.46116 | 99.17069 | 99.45545 |
| 2964 | 74.21059 | 99.46143 | 99.17095 | 99.45631 |
| 2963 | 73.90411 | 99.46171 | 99.17122 | 99.45715 |
| 2962 | 73.60826 | 99.46203 | 99.1715  | 99.45796 |
| 2961 | 73.32341 | 99.46236 | 99.17178 | 99.45876 |
| 2960 | 73.04988 | 99.46272 | 99.17207 | 99.45953 |
| 2959 | 72.78793 | 99.4631  | 99.17237 | 99.46028 |
| 2958 | 72.53776 | 99.4635  | 99.17268 | 99.461   |
| 2957 | 72.29945 | 99.46393 | 99.17299 | 99.46171 |
| 2956 | 72.07305 | 99.46438 | 99.17331 | 99.46239 |
| 2955 | 71.85857 | 99.46485 | 99.17364 | 99.46305 |
| 2954 | 71.65597 | 99.46534 | 99.17398 | 99.46369 |
| 2953 | 71.4652  | 99.46586 | 99.17432 | 99.4643  |
| 2952 | 71.28623 | 99.4664  | 99.17467 | 99.46489 |
| 2951 | 71.11902 | 99.46696 | 99.17503 | 99.46546 |
| 2950 | 70.96349 | 99.46754 | 99.1754  | 99.46601 |
| 2949 | 70.81956 | 99.46815 | 99.17577 | 99.46653 |
| 2948 | 70.68708 | 99.46878 | 99.17616 | 99.46702 |
| 2947 | 70.56584 | 99.46943 | 99.17655 | 99.46749 |
| 2946 | 70.45555 | 99.4701  | 99.17694 | 99.46794 |
| 2945 | 70.35587 | 99.4708  | 99.17735 | 99.46837 |
| 2944 | 70.26638 | 99.47151 | 99.17776 | 99.46877 |
| 2943 | 70.18663 | 99.47225 | 99.17818 | 99.46914 |
| 2942 | 70.11615 | 99.47301 | 99.1786  | 99.4695  |
| 2941 | 70.05445 | 99.47379 | 99.17903 | 99.46982 |
| 2940 | 70.00106 | 99.47459 | 99.17947 | 99.47013 |
| 2939 | 69.95551 | 99.47541 | 99.17992 | 99.47041 |

|      |          |          |          |          |
|------|----------|----------|----------|----------|
| 2938 | 69.91733 | 99.47626 | 99.18037 | 99.47066 |
| 2937 | 69.88608 | 99.47712 | 99.18084 | 99.47089 |
| 2936 | 69.86131 | 99.478   | 99.1813  | 99.4711  |
| 2935 | 69.8426  | 99.47891 | 99.18178 | 99.47128 |
| 2934 | 69.82955 | 99.47984 | 99.18226 | 99.47144 |
| 2933 | 69.8218  | 99.48078 | 99.18275 | 99.47157 |
| 2932 | 69.81906 | 99.48175 | 99.18324 | 99.47168 |
| 2931 | 69.82107 | 99.48273 | 99.18374 | 99.47176 |
| 2930 | 69.82766 | 99.48374 | 99.18425 | 99.47182 |
| 2929 | 69.83874 | 99.48476 | 99.18477 | 99.47186 |
| 2928 | 69.85428 | 99.48581 | 99.18529 | 99.47187 |
| 2927 | 69.87433 | 99.48687 | 99.18581 | 99.47186 |
| 2926 | 69.89897 | 99.48795 | 99.18635 | 99.47183 |
| 2925 | 69.92831 | 99.48905 | 99.18688 | 99.47177 |
| 2924 | 69.96246 | 99.49017 | 99.18743 | 99.47169 |
| 2923 | 70.00144 | 99.49131 | 99.18798 | 99.47159 |
| 2922 | 70.04524 | 99.49246 | 99.18854 | 99.47146 |
| 2921 | 70.09376 | 99.49363 | 99.1891  | 99.47131 |
| 2920 | 70.14679 | 99.49483 | 99.18967 | 99.47113 |
| 2919 | 70.20407 | 99.49603 | 99.19024 | 99.47094 |
| 2918 | 70.26526 | 99.49726 | 99.19082 | 99.47072 |
| 2917 | 70.32998 | 99.4985  | 99.1914  | 99.47048 |
| 2916 | 70.39782 | 99.49976 | 99.19199 | 99.47021 |
| 2915 | 70.46836 | 99.50104 | 99.19258 | 99.46993 |
| 2914 | 70.54117 | 99.50233 | 99.19318 | 99.46962 |
| 2913 | 70.61588 | 99.50364 | 99.19379 | 99.4693  |
| 2912 | 70.6921  | 99.50496 | 99.1944  | 99.46895 |
| 2911 | 70.76949 | 99.5063  | 99.19501 | 99.46858 |
| 2910 | 70.84773 | 99.50765 | 99.19563 | 99.46818 |
| 2909 | 70.92649 | 99.50902 | 99.19625 | 99.46777 |
| 2908 | 71.00545 | 99.51041 | 99.19687 | 99.46734 |
| 2907 | 71.0843  | 99.51181 | 99.1975  | 99.46689 |
| 2906 | 71.16275 | 99.51322 | 99.19814 | 99.46642 |
| 2905 | 71.24054 | 99.51465 | 99.19878 | 99.46593 |
| 2904 | 71.31749 | 99.51609 | 99.19942 | 99.46542 |
| 2903 | 71.39352 | 99.51754 | 99.20007 | 99.46489 |
| 2902 | 71.46864 | 99.51901 | 99.20071 | 99.46434 |
| 2901 | 71.54297 | 99.52049 | 99.20137 | 99.46378 |
| 2900 | 71.61671 | 99.52199 | 99.20202 | 99.4632  |
| 2899 | 71.69012 | 99.52349 | 99.20268 | 99.4626  |
| 2898 | 71.76349 | 99.52501 | 99.20334 | 99.46198 |

|      |          |          |          |          |
|------|----------|----------|----------|----------|
| 2897 | 71.83715 | 99.52654 | 99.20401 | 99.46135 |
| 2896 | 71.91148 | 99.52808 | 99.20468 | 99.4607  |
| 2895 | 71.98687 | 99.52963 | 99.20535 | 99.46003 |
| 2894 | 72.06379 | 99.5312  | 99.20602 | 99.45935 |
| 2893 | 72.1427  | 99.53277 | 99.20669 | 99.45865 |
| 2892 | 72.22412 | 99.53436 | 99.20737 | 99.45794 |
| 2891 | 72.30855 | 99.53595 | 99.20805 | 99.45721 |
| 2890 | 72.39646 | 99.53756 | 99.20873 | 99.45647 |
| 2889 | 72.48828 | 99.53917 | 99.20941 | 99.45571 |
| 2888 | 72.58436 | 99.54079 | 99.2101  | 99.45495 |
| 2887 | 72.68499 | 99.54243 | 99.21078 | 99.45417 |
| 2886 | 72.79038 | 99.54407 | 99.21147 | 99.45337 |
| 2885 | 72.90068 | 99.54572 | 99.21216 | 99.45257 |
| 2884 | 73.01601 | 99.54737 | 99.21285 | 99.45175 |
| 2883 | 73.13641 | 99.54904 | 99.21354 | 99.45092 |
| 2882 | 73.26194 | 99.55071 | 99.21423 | 99.45008 |
| 2881 | 73.39262 | 99.55239 | 99.21492 | 99.44923 |
| 2880 | 73.52845 | 99.55408 | 99.21561 | 99.44837 |
| 2879 | 73.66949 | 99.55577 | 99.2163  | 99.4475  |
| 2878 | 73.81576 | 99.55747 | 99.21699 | 99.44662 |
| 2877 | 73.96731 | 99.55917 | 99.21769 | 99.44573 |
| 2876 | 74.12421 | 99.56088 | 99.21838 | 99.44483 |
| 2875 | 74.28652 | 99.5626  | 99.21907 | 99.44393 |
| 2874 | 74.4543  | 99.56432 | 99.21976 | 99.44301 |
| 2873 | 74.62763 | 99.56604 | 99.22045 | 99.4421  |
| 2872 | 74.80661 | 99.56777 | 99.22114 | 99.44117 |
| 2871 | 74.99137 | 99.5695  | 99.22183 | 99.44024 |
| 2870 | 75.18204 | 99.57124 | 99.22252 | 99.4393  |
| 2869 | 75.37882 | 99.57298 | 99.2232  | 99.43836 |
| 2868 | 75.58191 | 99.57472 | 99.22389 | 99.43741 |
| 2867 | 75.79154 | 99.57647 | 99.22457 | 99.43646 |
| 2866 | 76.00794 | 99.57821 | 99.22525 | 99.4355  |
| 2865 | 76.23133 | 99.57996 | 99.22593 | 99.43454 |
| 2864 | 76.46193 | 99.58171 | 99.22661 | 99.43358 |
| 2863 | 76.69993 | 99.58347 | 99.22729 | 99.43261 |
| 2862 | 76.94551 | 99.58522 | 99.22796 | 99.43165 |
| 2861 | 77.19876 | 99.58697 | 99.22863 | 99.43068 |
| 2860 | 77.45971 | 99.58873 | 99.2293  | 99.42971 |
| 2859 | 77.72832 | 99.59048 | 99.22997 | 99.42874 |
| 2858 | 78.00444 | 99.59224 | 99.23063 | 99.42777 |
| 2857 | 78.28786 | 99.59399 | 99.2313  | 99.42679 |

|      |          |          |          |          |
|------|----------|----------|----------|----------|
| 2856 | 78.5783  | 99.59574 | 99.23195 | 99.42582 |
| 2855 | 78.87548 | 99.59749 | 99.23261 | 99.42485 |
| 2854 | 79.17905 | 99.59924 | 99.23326 | 99.42389 |
| 2853 | 79.48868 | 99.60099 | 99.23391 | 99.42292 |
| 2852 | 79.80398 | 99.60274 | 99.23455 | 99.42196 |
| 2851 | 80.12454 | 99.60448 | 99.23519 | 99.421   |
| 2850 | 80.44987 | 99.60622 | 99.23583 | 99.42004 |
| 2849 | 80.77944 | 99.60796 | 99.23646 | 99.41908 |
| 2848 | 81.11268 | 99.60969 | 99.23709 | 99.41813 |
| 2847 | 81.449   | 99.61142 | 99.23771 | 99.41719 |
| 2846 | 81.78781 | 99.61315 | 99.23833 | 99.41625 |
| 2845 | 82.12856 | 99.61487 | 99.23895 | 99.41531 |
| 2844 | 82.47072 | 99.61659 | 99.23956 | 99.41438 |
| 2843 | 82.8138  | 99.6183  | 99.24017 | 99.41346 |
| 2842 | 83.15734 | 99.62    | 99.24077 | 99.41254 |
| 2841 | 83.50088 | 99.6217  | 99.24137 | 99.41163 |
| 2840 | 83.84402 | 99.6234  | 99.24196 | 99.41073 |
| 2839 | 84.18633 | 99.62509 | 99.24254 | 99.40983 |
| 2838 | 84.52745 | 99.62677 | 99.24312 | 99.40894 |
| 2837 | 84.86702 | 99.62844 | 99.2437  | 99.40807 |
| 2836 | 85.20471 | 99.63011 | 99.24427 | 99.4072  |
| 2835 | 85.54021 | 99.63177 | 99.24483 | 99.40633 |
| 2834 | 85.87324 | 99.63343 | 99.24539 | 99.40548 |
| 2833 | 86.20351 | 99.63507 | 99.24594 | 99.40464 |
| 2832 | 86.53078 | 99.63671 | 99.24649 | 99.40381 |
| 2831 | 86.85478 | 99.63833 | 99.24703 | 99.40299 |
| 2830 | 87.17531 | 99.63995 | 99.24757 | 99.40218 |
| 2829 | 87.49215 | 99.64156 | 99.2481  | 99.40138 |
| 2828 | 87.80513 | 99.64316 | 99.24862 | 99.4006  |
| 2827 | 88.11404 | 99.64475 | 99.24913 | 99.39982 |
| 2826 | 88.4187  | 99.64633 | 99.24964 | 99.39906 |
| 2825 | 88.71888 | 99.6479  | 99.25015 | 99.39831 |
| 2824 | 89.01436 | 99.64946 | 99.25064 | 99.39757 |
| 2823 | 89.30486 | 99.65101 | 99.25113 | 99.39685 |
| 2822 | 89.59011 | 99.65255 | 99.25161 | 99.39614 |
| 2821 | 89.86981 | 99.65408 | 99.25209 | 99.39544 |
| 2820 | 90.14368 | 99.65559 | 99.25256 | 99.39476 |
| 2819 | 90.4114  | 99.65709 | 99.25302 | 99.39409 |
| 2818 | 90.67273 | 99.65858 | 99.25347 | 99.39343 |
| 2817 | 90.92742 | 99.66006 | 99.25392 | 99.3928  |
| 2816 | 91.17531 | 99.66153 | 99.25436 | 99.39217 |

|      |          |          |          |          |
|------|----------|----------|----------|----------|
| 2815 | 91.41631 | 99.66298 | 99.25479 | 99.39156 |
| 2814 | 91.65039 | 99.66442 | 99.25522 | 99.39097 |
| 2813 | 91.8776  | 99.66585 | 99.25564 | 99.39039 |
| 2812 | 92.09798 | 99.66726 | 99.25605 | 99.38983 |
| 2811 | 92.31162 | 99.66866 | 99.25645 | 99.38928 |
| 2810 | 92.51859 | 99.67004 | 99.25685 | 99.38875 |
| 2809 | 92.71892 | 99.67141 | 99.25724 | 99.38824 |
| 2808 | 92.91266 | 99.67277 | 99.25762 | 99.38774 |
| 2807 | 93.09986 | 99.67411 | 99.25799 | 99.38726 |
| 2806 | 93.2806  | 99.67544 | 99.25836 | 99.3868  |
| 2805 | 93.45502 | 99.67675 | 99.25871 | 99.38635 |
| 2804 | 93.62328 | 99.67804 | 99.25906 | 99.38592 |
| 2803 | 93.78557 | 99.67932 | 99.2594  | 99.38551 |
| 2802 | 93.94214 | 99.68059 | 99.25974 | 99.38512 |
| 2801 | 94.0932  | 99.68183 | 99.26006 | 99.38474 |
| 2800 | 94.23899 | 99.68306 | 99.26038 | 99.38438 |
| 2799 | 94.37972 | 99.68428 | 99.26069 | 99.38404 |
| 2798 | 94.51559 | 99.68548 | 99.261   | 99.38372 |
| 2797 | 94.64677 | 99.68666 | 99.26129 | 99.38342 |
| 2796 | 94.77341 | 99.68783 | 99.26158 | 99.38313 |
| 2795 | 94.89562 | 99.68897 | 99.26186 | 99.38286 |
| 2794 | 95.01349 | 99.6901  | 99.26213 | 99.38261 |
| 2793 | 95.12707 | 99.69122 | 99.26239 | 99.38238 |
| 2792 | 95.23644 | 99.69231 | 99.26265 | 99.38216 |
| 2791 | 95.34168 | 99.69339 | 99.26289 | 99.38197 |
| 2790 | 95.4429  | 99.69445 | 99.26313 | 99.38179 |
| 2789 | 95.54026 | 99.69549 | 99.26337 | 99.38163 |
| 2788 | 95.63389 | 99.69651 | 99.26359 | 99.38149 |
| 2787 | 95.72398 | 99.69752 | 99.2638  | 99.38137 |
| 2786 | 95.81066 | 99.6985  | 99.26401 | 99.38127 |
| 2785 | 95.89405 | 99.69947 | 99.26421 | 99.38118 |
| 2784 | 95.97427 | 99.70042 | 99.26441 | 99.38111 |
| 2783 | 96.05139 | 99.70135 | 99.26459 | 99.38106 |
| 2782 | 96.12552 | 99.70226 | 99.26477 | 99.38103 |
| 2781 | 96.19676 | 99.70315 | 99.26494 | 99.38102 |
| 2780 | 96.26524 | 99.70402 | 99.2651  | 99.38103 |
| 2779 | 96.33108 | 99.70487 | 99.26525 | 99.38105 |
| 2778 | 96.39443 | 99.70571 | 99.2654  | 99.38109 |
| 2777 | 96.45547 | 99.70652 | 99.26554 | 99.38115 |
| 2776 | 96.51436 | 99.70731 | 99.26567 | 99.38123 |
| 2775 | 96.57131 | 99.70809 | 99.2658  | 99.38132 |

|      |          |          |          |          |
|------|----------|----------|----------|----------|
| 2774 | 96.62655 | 99.70884 | 99.26591 | 99.38143 |
| 2773 | 96.68031 | 99.70957 | 99.26602 | 99.38156 |
| 2772 | 96.7328  | 99.71029 | 99.26612 | 99.38171 |
| 2771 | 96.7842  | 99.71098 | 99.26622 | 99.38187 |
| 2770 | 96.83464 | 99.71166 | 99.26631 | 99.38205 |
| 2769 | 96.88416 | 99.71231 | 99.26639 | 99.38225 |
| 2768 | 96.93276 | 99.71294 | 99.26646 | 99.38247 |
| 2767 | 96.98041 | 99.71355 | 99.26653 | 99.3827  |
| 2766 | 97.02705 | 99.71414 | 99.26659 | 99.38294 |
| 2765 | 97.07265 | 99.71471 | 99.26665 | 99.38321 |
| 2764 | 97.11721 | 99.71527 | 99.26669 | 99.38349 |
| 2763 | 97.16075 | 99.7158  | 99.26673 | 99.38378 |
| 2762 | 97.2033  | 99.7163  | 99.26677 | 99.38409 |
| 2761 | 97.2449  | 99.71679 | 99.2668  | 99.38442 |
| 2760 | 97.28558 | 99.71726 | 99.26682 | 99.38476 |
| 2759 | 97.32536 | 99.71771 | 99.26683 | 99.38511 |
| 2758 | 97.36423 | 99.71813 | 99.26684 | 99.38548 |
| 2757 | 97.40219 | 99.71854 | 99.26684 | 99.38587 |
| 2756 | 97.43923 | 99.71892 | 99.26684 | 99.38627 |
| 2755 | 97.47535 | 99.71929 | 99.26683 | 99.38668 |
| 2754 | 97.51057 | 99.71963 | 99.26682 | 99.38711 |
| 2753 | 97.54495 | 99.71995 | 99.2668  | 99.38755 |
| 2752 | 97.57855 | 99.72026 | 99.26677 | 99.388   |
| 2751 | 97.6115  | 99.72054 | 99.26674 | 99.38847 |
| 2750 | 97.64392 | 99.7208  | 99.26671 | 99.38894 |
| 2749 | 97.67593 | 99.72104 | 99.26667 | 99.38944 |
| 2748 | 97.70764 | 99.72126 | 99.26662 | 99.38994 |
| 2747 | 97.73911 | 99.72146 | 99.26657 | 99.39045 |
| 2746 | 97.77036 | 99.72163 | 99.26651 | 99.39098 |
| 2745 | 97.80139 | 99.72179 | 99.26645 | 99.39152 |
| 2744 | 97.83217 | 99.72193 | 99.26639 | 99.39206 |
| 2743 | 97.86268 | 99.72204 | 99.26632 | 99.39262 |
| 2742 | 97.89293 | 99.72214 | 99.26624 | 99.39319 |
| 2741 | 97.92296 | 99.72222 | 99.26617 | 99.39377 |
| 2740 | 97.95281 | 99.72227 | 99.26608 | 99.39436 |
| 2739 | 97.98253 | 99.72231 | 99.266   | 99.39496 |
| 2738 | 98.01218 | 99.72232 | 99.26591 | 99.39556 |
| 2737 | 98.04176 | 99.72232 | 99.26581 | 99.39618 |
| 2736 | 98.07132 | 99.72229 | 99.26572 | 99.3968  |
| 2735 | 98.10084 | 99.72225 | 99.26562 | 99.39743 |
| 2734 | 98.13035 | 99.72219 | 99.26551 | 99.39807 |

|      |          |          |          |          |
|------|----------|----------|----------|----------|
| 2733 | 98.15986 | 99.7221  | 99.26541 | 99.39872 |
| 2732 | 98.18937 | 99.722   | 99.2653  | 99.39937 |
| 2731 | 98.21887 | 99.72188 | 99.26518 | 99.40003 |
| 2730 | 98.2483  | 99.72174 | 99.26507 | 99.4007  |
| 2729 | 98.27756 | 99.72157 | 99.26495 | 99.40137 |
| 2728 | 98.30654 | 99.72139 | 99.26483 | 99.40205 |
| 2727 | 98.33512 | 99.7212  | 99.26471 | 99.40273 |
| 2726 | 98.36321 | 99.72098 | 99.26458 | 99.40342 |
| 2725 | 98.39079 | 99.72074 | 99.26446 | 99.40411 |
| 2724 | 98.41789 | 99.72049 | 99.26433 | 99.40481 |
| 2723 | 98.44458 | 99.72021 | 99.2642  | 99.40551 |
| 2722 | 98.47099 | 99.71992 | 99.26407 | 99.40621 |
| 2721 | 98.49721 | 99.71961 | 99.26394 | 99.40692 |
| 2720 | 98.52334 | 99.71928 | 99.2638  | 99.40762 |
| 2719 | 98.54943 | 99.71894 | 99.26367 | 99.40834 |
| 2718 | 98.57551 | 99.71857 | 99.26353 | 99.40905 |
| 2717 | 98.60158 | 99.71819 | 99.2634  | 99.40976 |
| 2716 | 98.62764 | 99.7178  | 99.26326 | 99.41048 |
| 2715 | 98.65368 | 99.71738 | 99.26312 | 99.4112  |
| 2714 | 98.67973 | 99.71695 | 99.26299 | 99.41191 |
| 2713 | 98.70584 | 99.7165  | 99.26285 | 99.41263 |
| 2712 | 98.73209 | 99.71604 | 99.26271 | 99.41335 |
| 2711 | 98.75858 | 99.71555 | 99.26258 | 99.41406 |
| 2710 | 98.7854  | 99.71506 | 99.26244 | 99.41478 |
| 2709 | 98.81262 | 99.71454 | 99.2623  | 99.41549 |
| 2708 | 98.84028 | 99.71401 | 99.26217 | 99.41621 |
| 2707 | 98.86836 | 99.71347 | 99.26203 | 99.41692 |
| 2706 | 98.89677 | 99.71291 | 99.2619  | 99.41763 |
| 2705 | 98.92541 | 99.71233 | 99.26177 | 99.41833 |
| 2704 | 98.95416 | 99.71174 | 99.26164 | 99.41903 |
| 2703 | 98.9829  | 99.71114 | 99.26151 | 99.41973 |
| 2702 | 99.01155 | 99.71052 | 99.26138 | 99.42043 |
| 2701 | 99.04005 | 99.70988 | 99.26125 | 99.42112 |
| 2700 | 99.06837 | 99.70924 | 99.26113 | 99.42181 |
| 2699 | 99.09643 | 99.70858 | 99.26101 | 99.42249 |
| 2698 | 99.12417 | 99.7079  | 99.26089 | 99.42317 |
| 2697 | 99.15148 | 99.70721 | 99.26077 | 99.42384 |
| 2696 | 99.17827 | 99.70651 | 99.26065 | 99.42451 |
| 2695 | 99.2044  | 99.7058  | 99.26054 | 99.42517 |
| 2694 | 99.22978 | 99.70507 | 99.26043 | 99.42583 |
| 2693 | 99.25432 | 99.70433 | 99.26033 | 99.42648 |



|      |          |          |          |          |
|------|----------|----------|----------|----------|
| 2692 | 99.27795 | 99.70358 | 99.26022 | 99.42712 |
| 2691 | 99.30061 | 99.70281 | 99.26012 | 99.42775 |
| 2690 | 99.32224 | 99.70204 | 99.26002 | 99.42838 |
| 2689 | 99.34278 | 99.70125 | 99.25993 | 99.429   |
| 2688 | 99.36218 | 99.70046 | 99.25984 | 99.42961 |
| 2687 | 99.38043 | 99.69965 | 99.25976 | 99.43021 |
| 2686 | 99.39757 | 99.69883 | 99.25968 | 99.43081 |
| 2685 | 99.41366 | 99.698   | 99.2596  | 99.4314  |
| 2684 | 99.42882 | 99.69716 | 99.25952 | 99.43197 |
| 2683 | 99.44318 | 99.69631 | 99.25946 | 99.43254 |
| 2682 | 99.45685 | 99.69546 | 99.25939 | 99.4331  |
| 2681 | 99.46992 | 99.69459 | 99.25933 | 99.43365 |
| 2680 | 99.48247 | 99.69371 | 99.25928 | 99.43419 |
| 2679 | 99.49454 | 99.69283 | 99.25923 | 99.43471 |
| 2678 | 99.50617 | 99.69194 | 99.25918 | 99.43523 |
| 2677 | 99.5174  | 99.69104 | 99.25914 | 99.43574 |
| 2676 | 99.5283  | 99.69013 | 99.25911 | 99.43624 |
| 2675 | 99.5389  | 99.68921 | 99.25908 | 99.43672 |
| 2674 | 99.54926 | 99.68829 | 99.25906 | 99.43719 |
| 2673 | 99.55943 | 99.68736 | 99.25904 | 99.43766 |
| 2672 | 99.56939 | 99.68642 | 99.25903 | 99.43811 |
| 2671 | 99.57913 | 99.68548 | 99.25902 | 99.43855 |
| 2670 | 99.58858 | 99.68453 | 99.25902 | 99.43897 |
| 2669 | 99.59764 | 99.68358 | 99.25903 | 99.43939 |
| 2668 | 99.60619 | 99.68262 | 99.25904 | 99.43979 |
| 2667 | 99.61406 | 99.68166 | 99.25906 | 99.44018 |
| 2666 | 99.61886 | 99.68069 | 99.25909 | 99.44056 |
| 2665 | 99.62497 | 99.67971 | 99.25912 | 99.44092 |
| 2664 | 99.63014 | 99.67874 | 99.25916 | 99.44128 |
| 2663 | 99.6343  | 99.67776 | 99.2592  | 99.44161 |
| 2662 | 99.63738 | 99.67677 | 99.25925 | 99.44194 |
| 2661 | 99.63941 | 99.67579 | 99.25931 | 99.44225 |
| 2660 | 99.64043 | 99.6748  | 99.25938 | 99.44255 |
| 2659 | 99.64049 | 99.6738  | 99.25945 | 99.44284 |
| 2658 | 99.63966 | 99.67281 | 99.25953 | 99.44311 |
| 2657 | 99.63802 | 99.67181 | 99.25962 | 99.44337 |
| 2656 | 99.63564 | 99.67081 | 99.25972 | 99.44361 |
| 2655 | 99.63261 | 99.66981 | 99.25982 | 99.44384 |
| 2654 | 99.62904 | 99.66881 | 99.25993 | 99.44406 |
| 2653 | 99.62508 | 99.66781 | 99.26005 | 99.44426 |
| 2652 | 99.62088 | 99.66681 | 99.26017 | 99.44445 |

|      |          |          |          |          |
|------|----------|----------|----------|----------|
| 2651 | 99.61658 | 99.66581 | 99.26031 | 99.44463 |
| 2650 | 99.61233 | 99.66481 | 99.26045 | 99.44479 |
| 2649 | 99.60825 | 99.66381 | 99.2606  | 99.44493 |
| 2648 | 99.60446 | 99.66281 | 99.26075 | 99.44507 |
| 2647 | 99.60105 | 99.66182 | 99.26092 | 99.44519 |
| 2646 | 99.59814 | 99.66082 | 99.26109 | 99.44529 |
| 2645 | 99.59585 | 99.65983 | 99.26127 | 99.44538 |
| 2644 | 99.59426 | 99.65884 | 99.26146 | 99.44546 |
| 2643 | 99.59343 | 99.65785 | 99.26166 | 99.44552 |
| 2642 | 99.59337 | 99.65686 | 99.26187 | 99.44557 |
| 2641 | 99.59399 | 99.65588 | 99.26208 | 99.44561 |
| 2640 | 99.59519 | 99.6549  | 99.2623  | 99.44563 |
| 2639 | 99.59683 | 99.65392 | 99.26253 | 99.44564 |
| 2638 | 99.59875 | 99.65295 | 99.26277 | 99.44563 |
| 2637 | 99.60084 | 99.65199 | 99.26302 | 99.44561 |
| 2636 | 99.603   | 99.65103 | 99.26327 | 99.44558 |
| 2635 | 99.60514 | 99.65007 | 99.26354 | 99.44553 |
| 2634 | 99.60718 | 99.64912 | 99.26381 | 99.44547 |
| 2633 | 99.60905 | 99.64818 | 99.26409 | 99.4454  |
| 2632 | 99.61065 | 99.64724 | 99.26438 | 99.44531 |
| 2631 | 99.61185 | 99.6463  | 99.26468 | 99.44521 |
| 2630 | 99.61256 | 99.64538 | 99.26499 | 99.4451  |
| 2629 | 99.61268 | 99.64446 | 99.2653  | 99.44498 |
| 2628 | 99.61214 | 99.64355 | 99.26562 | 99.44484 |
| 2627 | 99.61089 | 99.64265 | 99.26596 | 99.44469 |
| 2626 | 99.60888 | 99.64175 | 99.2663  | 99.44452 |
| 2625 | 99.60162 | 99.64087 | 99.26665 | 99.44435 |
| 2624 | 99.59836 | 99.63999 | 99.267   | 99.44416 |
| 2623 | 99.59496 | 99.63912 | 99.26737 | 99.44396 |
| 2622 | 99.59148 | 99.63826 | 99.26774 | 99.44375 |
| 2621 | 99.58799 | 99.63741 | 99.26813 | 99.44353 |
| 2620 | 99.58461 | 99.63657 | 99.26852 | 99.44329 |
| 2619 | 99.58149 | 99.63574 | 99.26892 | 99.44305 |
| 2618 | 99.57878 | 99.63491 | 99.26933 | 99.44279 |
| 2617 | 99.57658 | 99.63411 | 99.26974 | 99.44252 |
| 2616 | 99.575   | 99.63331 | 99.27017 | 99.44225 |
| 2615 | 99.57407 | 99.63252 | 99.2706  | 99.44196 |
| 2614 | 99.57377 | 99.63174 | 99.27104 | 99.44166 |
| 2613 | 99.57407 | 99.63098 | 99.27149 | 99.44135 |
| 2612 | 99.57488 | 99.63023 | 99.27194 | 99.44103 |
| 2611 | 99.57611 | 99.62949 | 99.27241 | 99.4407  |

|      |          |          |          |          |
|------|----------|----------|----------|----------|
| 2610 | 99.57768 | 99.62876 | 99.27288 | 99.44037 |
| 2609 | 99.57951 | 99.62805 | 99.27336 | 99.44002 |
| 2608 | 99.58155 | 99.62735 | 99.27385 | 99.43966 |
| 2607 | 99.58379 | 99.62666 | 99.27435 | 99.4393  |
| 2606 | 99.58623 | 99.62598 | 99.27485 | 99.43893 |
| 2605 | 99.58888 | 99.62532 | 99.27536 | 99.43855 |
| 2604 | 99.59172 | 99.62468 | 99.27588 | 99.43816 |
| 2603 | 99.5947  | 99.62405 | 99.27641 | 99.43777 |
| 2602 | 99.59773 | 99.62343 | 99.27694 | 99.43736 |
| 2601 | 99.60068 | 99.62283 | 99.27749 | 99.43695 |
| 2600 | 99.6034  | 99.62225 | 99.27804 | 99.43654 |
| 2599 | 99.60578 | 99.62168 | 99.27859 | 99.43611 |
| 2598 | 99.60775 | 99.62112 | 99.27915 | 99.43569 |
| 2597 | 99.60929 | 99.62058 | 99.27972 | 99.43525 |
| 2596 | 99.61043 | 99.62006 | 99.2803  | 99.43481 |
| 2595 | 99.61122 | 99.61955 | 99.28088 | 99.43437 |
| 2594 | 99.61171 | 99.61907 | 99.28147 | 99.43392 |
| 2593 | 99.61195 | 99.61859 | 99.28207 | 99.43346 |
| 2592 | 99.61194 | 99.61814 | 99.28267 | 99.433   |
| 2591 | 99.61166 | 99.6177  | 99.28328 | 99.43254 |
| 2590 | 99.61109 | 99.61728 | 99.2839  | 99.43207 |
| 2589 | 99.61022 | 99.61688 | 99.28452 | 99.4316  |
| 2588 | 99.60905 | 99.61649 | 99.28515 | 99.43113 |
| 2587 | 99.60761 | 99.61613 | 99.28578 | 99.43065 |
| 2586 | 99.606   | 99.61578 | 99.28642 | 99.43017 |
| 2585 | 99.6043  | 99.61545 | 99.28707 | 99.42969 |
| 2584 | 99.60268 | 99.61514 | 99.28772 | 99.42921 |
| 2583 | 99.60129 | 99.61485 | 99.28838 | 99.42873 |
| 2582 | 99.60032 | 99.61458 | 99.28904 | 99.42824 |
| 2581 | 99.59995 | 99.61433 | 99.28971 | 99.42775 |
| 2580 | 99.60029 | 99.61409 | 99.29038 | 99.42727 |
| 2579 | 99.6014  | 99.61388 | 99.29105 | 99.42678 |
| 2578 | 99.60325 | 99.61369 | 99.29173 | 99.42629 |
| 2577 | 99.60574 | 99.61351 | 99.29242 | 99.42581 |
| 2576 | 99.60871 | 99.61336 | 99.29311 | 99.42532 |
| 2575 | 99.61863 | 99.61323 | 99.29381 | 99.42484 |
| 2574 | 99.62085 | 99.61311 | 99.2945  | 99.42435 |
| 2573 | 99.62276 | 99.61302 | 99.29521 | 99.42387 |
| 2572 | 99.62431 | 99.61295 | 99.29591 | 99.42339 |
| 2571 | 99.6255  | 99.6129  | 99.29662 | 99.42292 |
| 2570 | 99.62636 | 99.61287 | 99.29734 | 99.42244 |

|      |          |          |          |          |
|------|----------|----------|----------|----------|
| 2569 | 99.62697 | 99.61287 | 99.29806 | 99.42197 |
| 2568 | 99.62741 | 99.61288 | 99.29878 | 99.4215  |
| 2567 | 99.62778 | 99.61292 | 99.2995  | 99.42104 |
| 2566 | 99.62819 | 99.61297 | 99.30023 | 99.42058 |
| 2565 | 99.62869 | 99.61305 | 99.30096 | 99.42012 |
| 2564 | 99.62931 | 99.61315 | 99.30169 | 99.41967 |
| 2563 | 99.63001 | 99.61327 | 99.30242 | 99.41922 |
| 2562 | 99.63072 | 99.61342 | 99.30316 | 99.41878 |
| 2561 | 99.63134 | 99.61359 | 99.3039  | 99.41834 |
| 2560 | 99.63177 | 99.61377 | 99.30464 | 99.41791 |
| 2559 | 99.63195 | 99.61399 | 99.30538 | 99.41748 |
| 2558 | 99.63184 | 99.61422 | 99.30613 | 99.41707 |
| 2557 | 99.63143 | 99.61447 | 99.30687 | 99.41665 |
| 2556 | 99.63075 | 99.61475 | 99.30762 | 99.41625 |
| 2555 | 99.62979 | 99.61505 | 99.30837 | 99.41585 |
| 2554 | 99.62857 | 99.61538 | 99.30912 | 99.41546 |
| 2553 | 99.6271  | 99.61573 | 99.30987 | 99.41508 |
| 2552 | 99.62543 | 99.61609 | 99.31062 | 99.4147  |
| 2551 | 99.62363 | 99.61649 | 99.31137 | 99.41433 |
| 2550 | 99.62184 | 99.6169  | 99.31212 | 99.41398 |
| 2549 | 99.62023 | 99.61734 | 99.31287 | 99.41363 |
| 2548 | 99.61898 | 99.6178  | 99.31362 | 99.41329 |
| 2547 | 99.61826 | 99.61829 | 99.31437 | 99.41296 |
| 2546 | 99.61818 | 99.61879 | 99.31512 | 99.41263 |
| 2545 | 99.61884 | 99.61932 | 99.31587 | 99.41232 |
| 2544 | 99.6241  | 99.61988 | 99.31662 | 99.41202 |
| 2543 | 99.62567 | 99.62045 | 99.31737 | 99.41173 |
| 2542 | 99.62707 | 99.62105 | 99.31812 | 99.41145 |
| 2541 | 99.62826 | 99.62168 | 99.31886 | 99.41118 |
| 2540 | 99.6292  | 99.62232 | 99.31961 | 99.41092 |
| 2539 | 99.62982 | 99.62299 | 99.32035 | 99.41067 |
| 2538 | 99.63001 | 99.62368 | 99.32109 | 99.41043 |
| 2537 | 99.6297  | 99.6244  | 99.32183 | 99.41021 |
| 2536 | 99.62882 | 99.62513 | 99.32257 | 99.40999 |
| 2535 | 99.62738 | 99.62589 | 99.3233  | 99.40979 |
| 2534 | 99.62547 | 99.62668 | 99.32403 | 99.4096  |
| 2533 | 99.62325 | 99.62749 | 99.32476 | 99.40942 |
| 2532 | 99.62091 | 99.62831 | 99.32549 | 99.40926 |
| 2531 | 99.61868 | 99.62917 | 99.32621 | 99.4091  |
| 2530 | 99.61675 | 99.63004 | 99.32693 | 99.40896 |
| 2529 | 99.61526 | 99.63094 | 99.32765 | 99.40884 |

|      |          |          |          |          |
|------|----------|----------|----------|----------|
| 2528 | 99.61432 | 99.63186 | 99.32836 | 99.40872 |
| 2527 | 99.61399 | 99.6328  | 99.32907 | 99.40862 |
| 2526 | 99.61427 | 99.63377 | 99.32978 | 99.40853 |
| 2525 | 99.61513 | 99.63476 | 99.33048 | 99.40846 |
| 2524 | 99.61648 | 99.63577 | 99.33118 | 99.4084  |
| 2523 | 99.61817 | 99.6368  | 99.33187 | 99.40835 |
| 2522 | 99.62003 | 99.63786 | 99.33256 | 99.40832 |
| 2521 | 99.62187 | 99.63893 | 99.33324 | 99.4083  |
| 2520 | 99.62352 | 99.64003 | 99.33392 | 99.40829 |
| 2519 | 99.61993 | 99.64115 | 99.33459 | 99.4083  |
| 2518 | 99.62093 | 99.6423  | 99.33526 | 99.40833 |
| 2517 | 99.62117 | 99.64346 | 99.33593 | 99.40836 |
| 2516 | 99.62077 | 99.64465 | 99.33658 | 99.40841 |
| 2515 | 99.61989 | 99.64585 | 99.33724 | 99.40848 |
| 2514 | 99.61867 | 99.64708 | 99.33788 | 99.40856 |
| 2513 | 99.61724 | 99.64833 | 99.33853 | 99.40865 |
| 2512 | 99.61572 | 99.6496  | 99.33916 | 99.40876 |
| 2511 | 99.61424 | 99.65089 | 99.33979 | 99.40888 |
| 2510 | 99.61292 | 99.65221 | 99.34041 | 99.40902 |
| 2509 | 99.61188 | 99.65354 | 99.34103 | 99.40917 |
| 2508 | 99.61119 | 99.65489 | 99.34164 | 99.40934 |
| 2507 | 99.61086 | 99.65627 | 99.34224 | 99.40952 |
| 2506 | 99.61081 | 99.65766 | 99.34284 | 99.40972 |
| 2505 | 99.61092 | 99.65907 | 99.34342 | 99.40993 |
| 2504 | 99.61102 | 99.66051 | 99.34401 | 99.41015 |
| 2503 | 99.61099 | 99.66196 | 99.34458 | 99.41039 |
| 2502 | 99.61077 | 99.66343 | 99.34515 | 99.41064 |
| 2501 | 99.61039 | 99.66492 | 99.34571 | 99.41091 |
| 2500 | 99.60991 | 99.66643 | 99.34626 | 99.41119 |
| 2499 | 99.60945 | 99.66796 | 99.3468  | 99.41149 |
| 2498 | 99.60911 | 99.66951 | 99.34734 | 99.4118  |
| 2497 | 99.60896 | 99.67108 | 99.34787 | 99.41212 |
| 2496 | 99.60906 | 99.67266 | 99.34839 | 99.41246 |
| 2495 | 99.60945 | 99.67426 | 99.3489  | 99.41281 |
| 2494 | 99.61016 | 99.67589 | 99.3494  | 99.41318 |
| 2493 | 99.61123 | 99.67752 | 99.3499  | 99.41356 |
| 2492 | 99.61264 | 99.67918 | 99.35039 | 99.41395 |
| 2491 | 99.61435 | 99.68085 | 99.35087 | 99.41435 |
| 2490 | 99.61624 | 99.68254 | 99.35134 | 99.41477 |
| 2489 | 99.61812 | 99.68425 | 99.3518  | 99.41521 |
| 2488 | 99.61978 | 99.68597 | 99.35225 | 99.41565 |

|      |          |          |          |          |
|------|----------|----------|----------|----------|
| 2487 | 99.62099 | 99.68771 | 99.35269 | 99.41611 |
| 2486 | 99.62156 | 99.68946 | 99.35313 | 99.41658 |
| 2485 | 99.62135 | 99.69123 | 99.35355 | 99.41707 |
| 2484 | 99.62029 | 99.69302 | 99.35397 | 99.41756 |
| 2483 | 99.62031 | 99.69482 | 99.35438 | 99.41807 |
| 2482 | 99.61809 | 99.69663 | 99.35477 | 99.41859 |
| 2481 | 99.61663 | 99.69846 | 99.35516 | 99.41912 |
| 2480 | 99.61595 | 99.70031 | 99.35554 | 99.41967 |
| 2479 | 99.61615 | 99.70216 | 99.35591 | 99.42022 |
| 2478 | 99.61781 | 99.70404 | 99.35627 | 99.42079 |
| 2477 | 99.61982 | 99.70592 | 99.35662 | 99.42137 |
| 2476 | 99.62209 | 99.70782 | 99.35696 | 99.42196 |
| 2475 | 99.62481 | 99.70973 | 99.35729 | 99.42256 |
| 2474 | 99.6281  | 99.71166 | 99.35762 | 99.42317 |
| 2473 | 99.63198 | 99.71359 | 99.35793 | 99.42379 |
| 2472 | 99.63641 | 99.71554 | 99.35823 | 99.42442 |
| 2471 | 99.6413  | 99.7175  | 99.35852 | 99.42506 |
| 2470 | 99.64656 | 99.71948 | 99.3588  | 99.42571 |
| 2469 | 99.65207 | 99.72146 | 99.35908 | 99.42637 |
| 2468 | 99.65773 | 99.72345 | 99.35934 | 99.42703 |
| 2467 | 99.6634  | 99.72546 | 99.35959 | 99.42771 |
| 2466 | 99.6689  | 99.72747 | 99.35984 | 99.42839 |
| 2465 | 99.67405 | 99.7295  | 99.36007 | 99.42909 |
| 2464 | 99.67868 | 99.73153 | 99.36029 | 99.42979 |
| 2463 | 99.68263 | 99.73358 | 99.36051 | 99.4305  |
| 2462 | 99.68586 | 99.73563 | 99.36071 | 99.43121 |
| 2461 | 99.68837 | 99.73769 | 99.3609  | 99.43193 |
| 2460 | 99.69024 | 99.73976 | 99.36109 | 99.43266 |
| 2459 | 99.69157 | 99.74184 | 99.36126 | 99.4334  |
| 2458 | 99.69245 | 99.74393 | 99.36142 | 99.43414 |
| 2457 | 99.69293 | 99.74602 | 99.36158 | 99.43489 |
| 2456 | 99.69301 | 99.74812 | 99.36172 | 99.43564 |
| 2455 | 99.69266 | 99.75023 | 99.36186 | 99.4364  |
| 2454 | 99.69184 | 99.75234 | 99.36198 | 99.43716 |
| 2453 | 99.69051 | 99.75446 | 99.36209 | 99.43793 |
| 2452 | 99.68862 | 99.75659 | 99.3622  | 99.4387  |
| 2451 | 99.68612 | 99.75872 | 99.3623  | 99.43947 |
| 2450 | 99.68296 | 99.76085 | 99.36238 | 99.44025 |
| 2449 | 99.67912 | 99.76299 | 99.36246 | 99.44104 |
| 2448 | 99.67458 | 99.76514 | 99.36252 | 99.44182 |
| 2447 | 99.66942 | 99.76729 | 99.36258 | 99.44261 |

|      |          |          |          |          |
|------|----------|----------|----------|----------|
| 2446 | 99.66375 | 99.76944 | 99.36263 | 99.4434  |
| 2445 | 99.65775 | 99.77159 | 99.36267 | 99.44419 |
| 2444 | 99.65164 | 99.77375 | 99.3627  | 99.44498 |
| 2443 | 99.64558 | 99.77591 | 99.36272 | 99.44578 |
| 2442 | 99.63969 | 99.77808 | 99.36273 | 99.44657 |
| 2441 | 99.63403 | 99.78024 | 99.36273 | 99.44737 |
| 2440 | 99.62857 | 99.78241 | 99.36272 | 99.44817 |
| 2439 | 99.62327 | 99.78457 | 99.36271 | 99.44896 |
| 2438 | 99.61808 | 99.78674 | 99.36268 | 99.44976 |
| 2437 | 99.61101 | 99.78891 | 99.36265 | 99.45055 |
| 2436 | 99.60615 | 99.79108 | 99.3626  | 99.45134 |
| 2435 | 99.60149 | 99.79325 | 99.36255 | 99.45214 |
| 2434 | 99.59699 | 99.79542 | 99.36249 | 99.45293 |
| 2433 | 99.59259 | 99.79759 | 99.36243 | 99.45371 |
| 2432 | 99.58819 | 99.79975 | 99.36235 | 99.4545  |
| 2431 | 99.58369 | 99.80192 | 99.36227 | 99.45528 |
| 2430 | 99.57901 | 99.80408 | 99.36218 | 99.45606 |
| 2429 | 99.5741  | 99.80624 | 99.36208 | 99.45683 |
| 2428 | 99.56894 | 99.80839 | 99.36197 | 99.45761 |
| 2427 | 99.56358 | 99.81055 | 99.36185 | 99.45837 |
| 2426 | 99.55807 | 99.8127  | 99.36173 | 99.45913 |
| 2425 | 99.55247 | 99.81485 | 99.3616  | 99.45989 |
| 2424 | 99.54692 | 99.81699 | 99.36146 | 99.46064 |
| 2423 | 99.54154 | 99.81913 | 99.36132 | 99.46139 |
| 2422 | 99.53655 | 99.82126 | 99.36117 | 99.46213 |
| 2421 | 99.53217 | 99.82339 | 99.36101 | 99.46286 |
| 2420 | 99.52863 | 99.82551 | 99.36084 | 99.46359 |
| 2419 | 99.52615 | 99.82762 | 99.36067 | 99.46431 |
| 2418 | 99.52485 | 99.82973 | 99.36049 | 99.46502 |
| 2417 | 99.52479 | 99.83184 | 99.36031 | 99.46573 |
| 2416 | 99.52592 | 99.83393 | 99.36012 | 99.46642 |
| 2415 | 99.52813 | 99.83602 | 99.35992 | 99.46711 |
| 2414 | 99.53126 | 99.8381  | 99.35972 | 99.46779 |
| 2413 | 99.53514 | 99.84017 | 99.35951 | 99.46846 |
| 2412 | 99.53961 | 99.84224 | 99.3593  | 99.46913 |
| 2411 | 99.54451 | 99.84429 | 99.35908 | 99.46978 |
| 2410 | 99.54969 | 99.84634 | 99.35885 | 99.47042 |
| 2409 | 99.55503 | 99.84838 | 99.35862 | 99.47105 |
| 2408 | 99.56038 | 99.8504  | 99.35839 | 99.47168 |
| 2407 | 99.56568 | 99.85242 | 99.35815 | 99.47229 |
| 2406 | 99.57093 | 99.85443 | 99.35791 | 99.47289 |

|      |          |          |          |          |
|------|----------|----------|----------|----------|
| 2405 | 99.57619 | 99.85642 | 99.35766 | 99.47348 |
| 2404 | 99.58157 | 99.85841 | 99.35741 | 99.47405 |
| 2403 | 99.58712 | 99.86038 | 99.35715 | 99.47462 |
| 2402 | 99.59276 | 99.86234 | 99.3569  | 99.47517 |
| 2401 | 99.59828 | 99.86429 | 99.35663 | 99.47572 |
| 2400 | 99.60338 | 99.86623 | 99.35637 | 99.47624 |
| 2399 | 99.60775 | 99.86815 | 99.3561  | 99.47676 |
| 2398 | 99.61117 | 99.87006 | 99.35583 | 99.47726 |
| 2397 | 99.61352 | 99.87196 | 99.35555 | 99.47775 |
| 2396 | 99.61486 | 99.87384 | 99.35527 | 99.47823 |
| 2395 | 99.61535 | 99.87571 | 99.35499 | 99.47869 |
| 2394 | 99.61522 | 99.87757 | 99.35471 | 99.47914 |
| 2393 | 99.61476 | 99.87941 | 99.35443 | 99.47958 |
| 2392 | 99.61428 | 99.88123 | 99.35414 | 99.48    |
| 2391 | 99.61258 | 99.88304 | 99.35385 | 99.4804  |
| 2390 | 99.61277 | 99.88484 | 99.35357 | 99.48079 |
| 2389 | 99.61359 | 99.88662 | 99.35328 | 99.48117 |
| 2388 | 99.61505 | 99.88838 | 99.35298 | 99.48153 |
| 2387 | 99.61708 | 99.89012 | 99.35269 | 99.48188 |
| 2386 | 99.61956 | 99.89185 | 99.3524  | 99.48221 |
| 2385 | 99.62236 | 99.89356 | 99.35211 | 99.48252 |
| 2384 | 99.62537 | 99.89526 | 99.35181 | 99.48282 |
| 2383 | 99.62854 | 99.89694 | 99.35152 | 99.4831  |
| 2382 | 99.63187 | 99.89859 | 99.35123 | 99.48337 |
| 2381 | 99.63536 | 99.90024 | 99.35094 | 99.48362 |
| 2380 | 99.63896 | 99.90186 | 99.35064 | 99.48385 |
| 2379 | 99.64262 | 99.90346 | 99.35035 | 99.48407 |
| 2378 | 99.6462  | 99.90505 | 99.35006 | 99.48427 |
| 2377 | 99.6495  | 99.90661 | 99.34978 | 99.48446 |
| 2376 | 99.65231 | 99.90816 | 99.34949 | 99.48463 |
| 2375 | 99.65442 | 99.90968 | 99.3492  | 99.48478 |
| 2374 | 99.65565 | 99.91119 | 99.34892 | 99.48491 |
| 2373 | 99.65588 | 99.91267 | 99.34864 | 99.48503 |
| 2372 | 99.65506 | 99.91414 | 99.34836 | 99.48513 |
| 2371 | 99.65321 | 99.91558 | 99.34808 | 99.48522 |
| 2370 | 99.65041 | 99.91701 | 99.34781 | 99.48529 |
| 2369 | 99.64673 | 99.91841 | 99.34754 | 99.48534 |
| 2368 | 99.64223 | 99.91979 | 99.34727 | 99.48537 |
| 2367 | 99.63698 | 99.92115 | 99.34701 | 99.48538 |
| 2366 | 99.63108 | 99.92249 | 99.34675 | 99.48538 |
| 2365 | 99.62467 | 99.9238  | 99.34649 | 99.48536 |



|      |          |          |          |          |
|------|----------|----------|----------|----------|
| 2364 | 99.61799 | 99.9251  | 99.34624 | 99.48533 |
| 2363 | 99.61126 | 99.92637 | 99.34599 | 99.48528 |
| 2362 | 99.60463 | 99.92761 | 99.34574 | 99.48521 |
| 2361 | 99.59814 | 99.92884 | 99.34551 | 99.48512 |
| 2360 | 99.59178 | 99.93004 | 99.34527 | 99.48502 |
| 2359 | 99.58556 | 99.93122 | 99.34504 | 99.4849  |
| 2358 | 99.57962 | 99.93238 | 99.34482 | 99.48476 |
| 2357 | 99.57428 | 99.93351 | 99.3446  | 99.48461 |
| 2356 | 99.57    | 99.93462 | 99.34438 | 99.48443 |
| 2355 | 99.56723 | 99.9357  | 99.34417 | 99.48425 |
| 2354 | 99.56636 | 99.93676 | 99.34397 | 99.48404 |
| 2353 | 99.56759 | 99.9378  | 99.34378 | 99.48382 |
| 2352 | 99.57094 | 99.93881 | 99.34359 | 99.48359 |
| 2351 | 99.57618 | 99.93979 | 99.3434  | 99.48333 |
| 2350 | 99.58291 | 99.94076 | 99.34323 | 99.48306 |
| 2349 | 99.59058 | 99.94169 | 99.34306 | 99.48278 |
| 2348 | 99.59854 | 99.94261 | 99.3429  | 99.48248 |
| 2347 | 99.60612 | 99.94349 | 99.34274 | 99.48216 |
| 2346 | 99.61883 | 99.94435 | 99.34259 | 99.48183 |
| 2345 | 99.6222  | 99.94519 | 99.34245 | 99.48148 |
| 2344 | 99.62208 | 99.946   | 99.34232 | 99.48112 |
| 2343 | 99.62018 | 99.94679 | 99.3422  | 99.48074 |
| 2342 | 99.61835 | 99.94755 | 99.34208 | 99.48035 |
| 2341 | 99.61846 | 99.94828 | 99.34197 | 99.47994 |
| 2340 | 99.61322 | 99.94899 | 99.34187 | 99.47952 |
| 2339 | 99.61484 | 99.94967 | 99.34178 | 99.47908 |
| 2338 | 99.61603 | 99.95033 | 99.3417  | 99.47863 |
| 2337 | 99.61676 | 99.95096 | 99.34163 | 99.47817 |
| 2336 | 99.61701 | 99.95157 | 99.34156 | 99.47769 |
| 2335 | 99.61679 | 99.95214 | 99.34151 | 99.4772  |
| 2334 | 99.61618 | 99.9527  | 99.34146 | 99.4767  |
| 2333 | 99.61529 | 99.95322 | 99.34143 | 99.47618 |
| 2332 | 99.61425 | 99.95372 | 99.3414  | 99.47565 |
| 2331 | 99.6132  | 99.9542  | 99.34139 | 99.47511 |
| 2330 | 99.61224 | 99.95464 | 99.34138 | 99.47456 |
| 2329 | 99.61146 | 99.95506 | 99.34138 | 99.474   |
| 2328 | 99.61093 | 99.95546 | 99.3414  | 99.47342 |
| 2327 | 99.61069 | 99.95582 | 99.34142 | 99.47283 |
| 2326 | 99.61083 | 99.95616 | 99.34146 | 99.47224 |
| 2325 | 99.61146 | 99.95648 | 99.3415  | 99.47163 |
| 2324 | 99.61273 | 99.95677 | 99.34156 | 99.47101 |

|      |          |          |          |          |
|------|----------|----------|----------|----------|
| 2323 | 99.61482 | 99.95703 | 99.34162 | 99.47038 |
| 2322 | 99.61784 | 99.95726 | 99.3417  | 99.46974 |
| 2321 | 99.62178 | 99.95747 | 99.34179 | 99.4691  |
| 2320 | 99.62654 | 99.95765 | 99.34189 | 99.46844 |
| 2319 | 99.63188 | 99.95781 | 99.342   | 99.46778 |
| 2318 | 99.63754 | 99.95794 | 99.34212 | 99.4671  |
| 2317 | 99.64322 | 99.95804 | 99.34226 | 99.46642 |
| 2316 | 99.64867 | 99.95811 | 99.3424  | 99.46574 |
| 2315 | 99.65362 | 99.95816 | 99.34256 | 99.46504 |
| 2314 | 99.65778 | 99.95819 | 99.34273 | 99.46434 |
| 2313 | 99.66088 | 99.95818 | 99.34291 | 99.46363 |
| 2312 | 99.66267 | 99.95816 | 99.3431  | 99.46292 |
| 2311 | 99.66294 | 99.9581  | 99.3433  | 99.4622  |
| 2310 | 99.6616  | 99.95802 | 99.34352 | 99.46148 |
| 2309 | 99.65869 | 99.95791 | 99.34374 | 99.46075 |
| 2308 | 99.6543  | 99.95778 | 99.34398 | 99.46001 |
| 2307 | 99.64859 | 99.95762 | 99.34423 | 99.45928 |
| 2306 | 99.64179 | 99.95744 | 99.3445  | 99.45854 |
| 2305 | 99.63417 | 99.95723 | 99.34477 | 99.45779 |
| 2304 | 99.62605 | 99.957   | 99.34506 | 99.45705 |
| 2303 | 99.61776 | 99.95674 | 99.34536 | 99.4563  |
| 2302 | 99.60965 | 99.95645 | 99.34567 | 99.45554 |
| 2301 | 99.60196 | 99.95614 | 99.346   | 99.45479 |
| 2300 | 99.61145 | 99.95581 | 99.34634 | 99.45404 |
| 2299 | 99.60575 | 99.95545 | 99.34668 | 99.45328 |
| 2298 | 99.6008  | 99.95506 | 99.34705 | 99.45253 |
| 2297 | 99.59635 | 99.95466 | 99.34742 | 99.45177 |
| 2296 | 99.59224 | 99.95422 | 99.34781 | 99.45102 |
| 2295 | 99.58836 | 99.95377 | 99.3482  | 99.45027 |
| 2294 | 99.58475 | 99.95328 | 99.34861 | 99.44952 |
| 2293 | 99.58149 | 99.95278 | 99.34904 | 99.44877 |
| 2292 | 99.57867 | 99.95225 | 99.34947 | 99.44802 |
| 2291 | 99.57636 | 99.9517  | 99.34992 | 99.44727 |
| 2290 | 99.57455 | 99.95112 | 99.35038 | 99.44653 |
| 2289 | 99.57318 | 99.95053 | 99.35085 | 99.44579 |
| 2288 | 99.57217 | 99.94991 | 99.35133 | 99.44506 |
| 2287 | 99.5714  | 99.94926 | 99.35183 | 99.44433 |
| 2286 | 99.57084 | 99.9486  | 99.35234 | 99.44361 |
| 2285 | 99.57045 | 99.94791 | 99.35286 | 99.44289 |
| 2284 | 99.57024 | 99.9472  | 99.35339 | 99.44217 |
| 2283 | 99.5702  | 99.94646 | 99.35394 | 99.44147 |

|      |          |          |          |          |
|------|----------|----------|----------|----------|
| 2282 | 99.57031 | 99.94571 | 99.35449 | 99.44076 |
| 2281 | 99.57047 | 99.94494 | 99.35506 | 99.44007 |
| 2280 | 99.57058 | 99.94414 | 99.35564 | 99.43938 |
| 2279 | 99.57054 | 99.94332 | 99.35623 | 99.43871 |
| 2278 | 99.57026 | 99.94248 | 99.35683 | 99.43804 |
| 2277 | 99.56973 | 99.94163 | 99.35745 | 99.43737 |
| 2276 | 99.56897 | 99.94075 | 99.35807 | 99.43672 |
| 2275 | 99.56805 | 99.93985 | 99.35871 | 99.43608 |
| 2274 | 99.56703 | 99.93893 | 99.35936 | 99.43545 |
| 2273 | 99.566   | 99.938   | 99.36002 | 99.43482 |
| 2272 | 99.56504 | 99.93704 | 99.36069 | 99.43421 |
| 2271 | 99.56427 | 99.93607 | 99.36137 | 99.43361 |
| 2270 | 99.56383 | 99.93507 | 99.36206 | 99.43302 |
| 2269 | 99.56385 | 99.93406 | 99.36276 | 99.43244 |
| 2268 | 99.56443 | 99.93303 | 99.36347 | 99.43188 |
| 2267 | 99.5656  | 99.93199 | 99.3642  | 99.43133 |
| 2266 | 99.5673  | 99.93092 | 99.36493 | 99.43079 |
| 2265 | 99.56942 | 99.92984 | 99.36568 | 99.43026 |
| 2264 | 99.57186 | 99.92874 | 99.36643 | 99.42975 |
| 2263 | 99.57452 | 99.92763 | 99.36719 | 99.42925 |
| 2262 | 99.57742 | 99.9265  | 99.36797 | 99.42877 |
| 2261 | 99.58059 | 99.92535 | 99.36875 | 99.4283  |
| 2260 | 99.58414 | 99.92419 | 99.36954 | 99.42785 |
| 2259 | 99.58813 | 99.92302 | 99.37034 | 99.42741 |
| 2258 | 99.5926  | 99.92183 | 99.37115 | 99.42699 |
| 2257 | 99.59753 | 99.92062 | 99.37197 | 99.42658 |
| 2256 | 99.60289 | 99.9194  | 99.3728  | 99.4262  |
| 2255 | 99.60863 | 99.91817 | 99.37364 | 99.42582 |
| 2254 | 99.60918 | 99.91692 | 99.37449 | 99.42547 |
| 2253 | 99.61582 | 99.91567 | 99.37534 | 99.42513 |
| 2252 | 99.62274 | 99.91439 | 99.3762  | 99.42481 |
| 2251 | 99.62982 | 99.91311 | 99.37707 | 99.42451 |
| 2250 | 99.63683 | 99.91181 | 99.37795 | 99.42423 |
| 2249 | 99.64346 | 99.91051 | 99.37883 | 99.42397 |
| 2248 | 99.64944 | 99.90919 | 99.37972 | 99.42372 |
| 2247 | 99.65461 | 99.90786 | 99.38062 | 99.4235  |
| 2246 | 99.65894 | 99.90652 | 99.38153 | 99.42329 |
| 2245 | 99.6626  | 99.90517 | 99.38244 | 99.4231  |
| 2244 | 99.66583 | 99.90381 | 99.38336 | 99.42294 |
| 2243 | 99.66891 | 99.90244 | 99.38428 | 99.42279 |
| 2242 | 99.67203 | 99.90107 | 99.38522 | 99.42267 |

|      |          |          |          |          |
|------|----------|----------|----------|----------|
| 2241 | 99.67527 | 99.89968 | 99.38615 | 99.42256 |
| 2240 | 99.67861 | 99.89829 | 99.38709 | 99.42248 |
| 2239 | 99.68195 | 99.89689 | 99.38804 | 99.42241 |
| 2238 | 99.68516 | 99.89548 | 99.38899 | 99.42237 |
| 2237 | 99.68809 | 99.89406 | 99.38995 | 99.42235 |
| 2236 | 99.69059 | 99.89264 | 99.39091 | 99.42235 |
| 2235 | 99.6925  | 99.89121 | 99.39188 | 99.42237 |
| 2234 | 99.69364 | 99.88978 | 99.39285 | 99.42242 |
| 2233 | 99.69385 | 99.88834 | 99.39383 | 99.42248 |
| 2232 | 99.69302 | 99.8869  | 99.3948  | 99.42257 |
| 2231 | 99.69119 | 99.88545 | 99.39579 | 99.42268 |
| 2230 | 99.6885  | 99.884   | 99.39677 | 99.42281 |
| 2229 | 99.68517 | 99.88254 | 99.39776 | 99.42297 |
| 2228 | 99.68145 | 99.88108 | 99.39875 | 99.42315 |
| 2227 | 99.67748 | 99.87962 | 99.39974 | 99.42335 |
| 2226 | 99.6733  | 99.87816 | 99.40074 | 99.42357 |
| 2225 | 99.66885 | 99.87669 | 99.40173 | 99.42382 |
| 2224 | 99.66403 | 99.87522 | 99.40273 | 99.42409 |
| 2223 | 99.65877 | 99.87375 | 99.40373 | 99.42438 |
| 2222 | 99.65313 | 99.87229 | 99.40473 | 99.42469 |
| 2221 | 99.64726 | 99.87082 | 99.40573 | 99.42503 |
| 2220 | 99.64138 | 99.86935 | 99.40674 | 99.42539 |
| 2219 | 99.63562 | 99.86788 | 99.40774 | 99.42577 |
| 2218 | 99.63006 | 99.86641 | 99.40874 | 99.42618 |
| 2217 | 99.62463 | 99.86495 | 99.40974 | 99.42661 |
| 2216 | 99.61918 | 99.86348 | 99.41075 | 99.42706 |
| 2215 | 99.6136  | 99.86202 | 99.41175 | 99.42753 |
| 2214 | 99.60784 | 99.86057 | 99.41275 | 99.42803 |
| 2213 | 99.59372 | 99.85911 | 99.41375 | 99.42855 |
| 2212 | 99.58803 | 99.85766 | 99.41474 | 99.42909 |
| 2211 | 99.5834  | 99.85621 | 99.41574 | 99.42965 |
| 2210 | 99.57976 | 99.85477 | 99.41673 | 99.43024 |
| 2209 | 99.57702 | 99.85333 | 99.41772 | 99.43085 |
| 2208 | 99.57515 | 99.8519  | 99.41871 | 99.43148 |
| 2207 | 99.57419 | 99.85047 | 99.4197  | 99.43213 |
| 2206 | 99.5743  | 99.84905 | 99.42068 | 99.43281 |
| 2205 | 99.57571 | 99.84764 | 99.42166 | 99.4335  |
| 2204 | 99.5786  | 99.84624 | 99.42263 | 99.43422 |
| 2203 | 99.58303 | 99.84484 | 99.4236  | 99.43496 |
| 2202 | 99.58878 | 99.84345 | 99.42457 | 99.43572 |
| 2201 | 99.59541 | 99.84207 | 99.42553 | 99.4365  |

|      |          |          |          |          |
|------|----------|----------|----------|----------|
| 2200 | 99.60229 | 99.84069 | 99.42649 | 99.4373  |
| 2199 | 99.60878 | 99.83933 | 99.42744 | 99.43813 |
| 2198 | 99.61434 | 99.83798 | 99.42838 | 99.43897 |
| 2197 | 99.61859 | 99.83663 | 99.42933 | 99.43983 |
| 2196 | 99.62135 | 99.8353  | 99.43026 | 99.44071 |
| 2195 | 99.62258 | 99.83398 | 99.43119 | 99.44161 |
| 2194 | 99.62232 | 99.83267 | 99.43211 | 99.44254 |
| 2193 | 99.62069 | 99.83137 | 99.43303 | 99.44348 |
| 2192 | 99.61783 | 99.83009 | 99.43393 | 99.44443 |
| 2191 | 99.61397 | 99.82881 | 99.43484 | 99.44541 |
| 2190 | 99.60936 | 99.82755 | 99.43573 | 99.44641 |
| 2189 | 99.60423 | 99.82631 | 99.43661 | 99.44742 |
| 2188 | 99.60985 | 99.82508 | 99.43749 | 99.44845 |
| 2187 | 99.60384 | 99.82386 | 99.43836 | 99.4495  |
| 2186 | 99.59945 | 99.82266 | 99.43922 | 99.45056 |
| 2185 | 99.5965  | 99.82147 | 99.44007 | 99.45164 |
| 2184 | 99.59475 | 99.8203  | 99.44092 | 99.45274 |
| 2183 | 99.59405 | 99.81914 | 99.44175 | 99.45385 |
| 2182 | 99.59431 | 99.818   | 99.44258 | 99.45498 |
| 2181 | 99.59554 | 99.81688 | 99.44339 | 99.45612 |
| 2180 | 99.59775 | 99.81577 | 99.4442  | 99.45727 |
| 2179 | 99.6008  | 99.81469 | 99.44499 | 99.45844 |
| 2178 | 99.60444 | 99.81362 | 99.44577 | 99.45963 |
| 2177 | 99.60827 | 99.81257 | 99.44655 | 99.46082 |
| 2176 | 99.61187 | 99.81153 | 99.44731 | 99.46203 |
| 2175 | 99.61494 | 99.81052 | 99.44806 | 99.46325 |
| 2174 | 99.61733 | 99.80953 | 99.4488  | 99.46449 |
| 2173 | 99.61911 | 99.80855 | 99.44953 | 99.46573 |
| 2172 | 99.62042 | 99.8076  | 99.45024 | 99.46699 |
| 2171 | 99.62137 | 99.80667 | 99.45095 | 99.46825 |
| 2170 | 99.62197 | 99.80576 | 99.45164 | 99.46953 |
| 2169 | 99.62207 | 99.80487 | 99.45232 | 99.47081 |
| 2168 | 99.62141 | 99.804   | 99.45299 | 99.47211 |
| 2167 | 99.62588 | 99.80315 | 99.45364 | 99.47341 |
| 2166 | 99.62504 | 99.80233 | 99.45428 | 99.47472 |
| 2165 | 99.62365 | 99.80153 | 99.45491 | 99.47604 |
| 2164 | 99.62187 | 99.80075 | 99.45552 | 99.47736 |
| 2163 | 99.61983 | 99.8     | 99.45613 | 99.47869 |
| 2162 | 99.61755 | 99.79927 | 99.45671 | 99.48003 |
| 2161 | 99.61492 | 99.79856 | 99.45729 | 99.48137 |
| 2160 | 99.61177 | 99.79788 | 99.45785 | 99.48272 |

|      |          |          |          |          |
|------|----------|----------|----------|----------|
| 2159 | 99.608   | 99.79723 | 99.45839 | 99.48407 |
| 2158 | 99.6037  | 99.7966  | 99.45892 | 99.48542 |
| 2157 | 99.59918 | 99.79599 | 99.45944 | 99.48678 |
| 2156 | 99.59488 | 99.79541 | 99.45994 | 99.48814 |
| 2155 | 99.5913  | 99.79486 | 99.46043 | 99.4895  |
| 2154 | 99.58883 | 99.79433 | 99.4609  | 99.49086 |
| 2153 | 99.58771 | 99.79383 | 99.46135 | 99.49222 |
| 2152 | 99.588   | 99.79336 | 99.4618  | 99.49359 |
| 2151 | 99.58964 | 99.79291 | 99.46222 | 99.49495 |
| 2150 | 99.59252 | 99.7925  | 99.46263 | 99.49631 |
| 2149 | 99.59644 | 99.7921  | 99.46303 | 99.49767 |
| 2148 | 99.60117 | 99.79174 | 99.46341 | 99.49903 |
| 2147 | 99.60642 | 99.79141 | 99.46377 | 99.50039 |
| 2146 | 99.6118  | 99.7911  | 99.46412 | 99.50174 |
| 2145 | 99.61691 | 99.79083 | 99.46445 | 99.50309 |
| 2144 | 99.62143 | 99.79058 | 99.46476 | 99.50443 |
| 2143 | 99.62517 | 99.79036 | 99.46506 | 99.50577 |
| 2142 | 99.62811 | 99.79017 | 99.46534 | 99.50711 |
| 2141 | 99.6304  | 99.79002 | 99.46561 | 99.50843 |
| 2140 | 99.63224 | 99.78989 | 99.46586 | 99.50975 |
| 2139 | 99.63386 | 99.78979 | 99.46609 | 99.51107 |
| 2138 | 99.63536 | 99.78972 | 99.46631 | 99.51237 |
| 2137 | 99.63682 | 99.78969 | 99.46651 | 99.51367 |
| 2136 | 99.63828 | 99.78968 | 99.4667  | 99.51495 |
| 2135 | 99.63985 | 99.78971 | 99.46686 | 99.51623 |
| 2134 | 99.64176 | 99.78977 | 99.46701 | 99.5175  |
| 2133 | 99.64427 | 99.78985 | 99.46715 | 99.51875 |
| 2132 | 99.62937 | 99.78997 | 99.46727 | 99.52    |
| 2131 | 99.6336  | 99.79013 | 99.46737 | 99.52123 |
| 2130 | 99.63721 | 99.79031 | 99.46745 | 99.52245 |
| 2129 | 99.64012 | 99.79053 | 99.46752 | 99.52365 |
| 2128 | 99.64225 | 99.79078 | 99.46757 | 99.52484 |
| 2127 | 99.64354 | 99.79106 | 99.4676  | 99.52602 |
| 2126 | 99.64405 | 99.79137 | 99.46762 | 99.52718 |
| 2125 | 99.64397 | 99.79172 | 99.46762 | 99.52833 |
| 2124 | 99.64354 | 99.7921  | 99.4676  | 99.52946 |
| 2123 | 99.64293 | 99.79251 | 99.46757 | 99.53058 |
| 2122 | 99.64221 | 99.79296 | 99.46752 | 99.53167 |
| 2121 | 99.64131 | 99.79344 | 99.46745 | 99.53275 |
| 2120 | 99.6401  | 99.79395 | 99.46737 | 99.53382 |
| 2119 | 99.63847 | 99.7945  | 99.46727 | 99.53486 |

|      |          |          |          |          |
|------|----------|----------|----------|----------|
| 2118 | 99.63643 | 99.79508 | 99.46716 | 99.53588 |
| 2117 | 99.63414 | 99.79569 | 99.46703 | 99.53689 |
| 2116 | 99.63186 | 99.79634 | 99.46688 | 99.53787 |
| 2115 | 99.62982 | 99.79702 | 99.46672 | 99.53883 |
| 2114 | 99.6282  | 99.79773 | 99.46654 | 99.53977 |
| 2113 | 99.627   | 99.79848 | 99.46634 | 99.54069 |
| 2112 | 99.62619 | 99.79927 | 99.46613 | 99.54159 |
| 2111 | 99.64021 | 99.80008 | 99.4659  | 99.54246 |
| 2110 | 99.63852 | 99.80093 | 99.46566 | 99.54332 |
| 2109 | 99.63604 | 99.80182 | 99.4654  | 99.54414 |
| 2108 | 99.63296 | 99.80274 | 99.46513 | 99.54495 |
| 2107 | 99.62956 | 99.80369 | 99.46484 | 99.54573 |
| 2106 | 99.62608 | 99.80468 | 99.46454 | 99.54648 |
| 2105 | 99.6227  | 99.8057  | 99.46422 | 99.54721 |
| 2104 | 99.61957 | 99.80675 | 99.46389 | 99.54792 |
| 2103 | 99.61684 | 99.80784 | 99.46354 | 99.54859 |
| 2102 | 99.61467 | 99.80897 | 99.46318 | 99.54925 |
| 2101 | 99.61322 | 99.81012 | 99.4628  | 99.54987 |
| 2100 | 99.61264 | 99.81131 | 99.46242 | 99.55047 |
| 2099 | 99.61297 | 99.81254 | 99.46201 | 99.55104 |
| 2098 | 99.61413 | 99.8138  | 99.46159 | 99.55158 |
| 2097 | 99.61589 | 99.81509 | 99.46116 | 99.55209 |
| 2096 | 99.61794 | 99.81642 | 99.46072 | 99.55258 |
| 2095 | 99.61998 | 99.81778 | 99.46026 | 99.55304 |
| 2094 | 99.62178 | 99.81917 | 99.4598  | 99.55346 |
| 2093 | 99.62323 | 99.8206  | 99.45931 | 99.55386 |
| 2092 | 99.6243  | 99.82206 | 99.45882 | 99.55423 |
| 2091 | 99.625   | 99.82355 | 99.45831 | 99.55457 |
| 2090 | 99.62537 | 99.82508 | 99.4578  | 99.55488 |
| 2089 | 99.62545 | 99.82664 | 99.45727 | 99.55516 |
| 2088 | 99.6253  | 99.82823 | 99.45672 | 99.55541 |
| 2087 | 99.62503 | 99.82985 | 99.45617 | 99.55563 |
| 2086 | 99.62219 | 99.83151 | 99.45561 | 99.55581 |
| 2085 | 99.62273 | 99.8332  | 99.45504 | 99.55597 |
| 2084 | 99.62362 | 99.83492 | 99.45445 | 99.55609 |
| 2083 | 99.62491 | 99.83668 | 99.45386 | 99.55619 |
| 2082 | 99.62654 | 99.83846 | 99.45326 | 99.55625 |
| 2081 | 99.62831 | 99.84028 | 99.45264 | 99.55628 |
| 2080 | 99.62999 | 99.84213 | 99.45202 | 99.55628 |
| 2079 | 99.63139 | 99.84401 | 99.45139 | 99.55625 |
| 2078 | 99.63244 | 99.84592 | 99.45075 | 99.55618 |

|      |          |          |          |          |
|------|----------|----------|----------|----------|
| 2077 | 99.63317 | 99.84787 | 99.4501  | 99.55609 |
| 2076 | 99.63363 | 99.84984 | 99.44945 | 99.55596 |
| 2075 | 99.63386 | 99.85184 | 99.44879 | 99.5558  |
| 2074 | 99.63377 | 99.85388 | 99.44812 | 99.55561 |
| 2073 | 99.63317 | 99.85594 | 99.44744 | 99.55539 |
| 2072 | 99.63185 | 99.85804 | 99.44676 | 99.55513 |
| 2071 | 99.62967 | 99.86016 | 99.44607 | 99.55484 |
| 2070 | 99.62664 | 99.86231 | 99.44537 | 99.55453 |
| 2069 | 99.62294 | 99.86449 | 99.44467 | 99.55418 |
| 2068 | 99.61883 | 99.8667  | 99.44396 | 99.5538  |
| 2067 | 99.61456 | 99.86894 | 99.44325 | 99.55338 |
| 2066 | 99.61594 | 99.87121 | 99.44254 | 99.55294 |
| 2065 | 99.61314 | 99.8735  | 99.44182 | 99.55247 |
| 2064 | 99.61213 | 99.87583 | 99.44109 | 99.55196 |
| 2063 | 99.6124  | 99.87817 | 99.44036 | 99.55142 |
| 2062 | 99.61352 | 99.88055 | 99.43963 | 99.55086 |
| 2061 | 99.61517 | 99.88295 | 99.4389  | 99.55026 |
| 2060 | 99.61715 | 99.88538 | 99.43817 | 99.54963 |
| 2059 | 99.61931 | 99.88784 | 99.43743 | 99.54898 |
| 2058 | 99.62144 | 99.89032 | 99.43669 | 99.54829 |
| 2057 | 99.62329 | 99.89282 | 99.43595 | 99.54758 |
| 2056 | 99.62457 | 99.89535 | 99.43521 | 99.54683 |
| 2055 | 99.62502 | 99.8979  | 99.43447 | 99.54606 |
| 2054 | 99.62446 | 99.90048 | 99.43373 | 99.54526 |
| 2053 | 99.6228  | 99.90308 | 99.43299 | 99.54443 |
| 2052 | 99.62001 | 99.90571 | 99.43225 | 99.54357 |
| 2051 | 99.61601 | 99.90836 | 99.43151 | 99.54269 |
| 2050 | 99.59462 | 99.91103 | 99.43078 | 99.54178 |
| 2049 | 99.59148 | 99.91372 | 99.43004 | 99.54084 |
| 2048 | 99.59014 | 99.91643 | 99.42931 | 99.53988 |
| 2047 | 99.59035 | 99.91917 | 99.42858 | 99.53889 |
| 2046 | 99.59187 | 99.92192 | 99.42785 | 99.53787 |
| 2045 | 99.59444 | 99.9247  | 99.42713 | 99.53684 |
| 2044 | 99.59779 | 99.92749 | 99.42641 | 99.53577 |
| 2043 | 99.60163 | 99.93031 | 99.4257  | 99.53469 |
| 2042 | 99.60557 | 99.93314 | 99.42499 | 99.53358 |
| 2041 | 99.60926 | 99.93599 | 99.42429 | 99.53245 |
| 2040 | 99.6124  | 99.93886 | 99.42359 | 99.53129 |
| 2039 | 99.61483 | 99.94175 | 99.4229  | 99.53012 |
| 2038 | 99.61659 | 99.94466 | 99.42221 | 99.52892 |
| 2037 | 99.6178  | 99.94758 | 99.42154 | 99.52771 |



|      |          |           |          |          |
|------|----------|-----------|----------|----------|
| 2036 | 99.61866 | 99.95051  | 99.42087 | 99.52647 |
| 2035 | 99.61925 | 99.95347  | 99.4202  | 99.52522 |
| 2034 | 99.61952 | 99.95644  | 99.41955 | 99.52394 |
| 2033 | 99.61934 | 99.95942  | 99.4189  | 99.52265 |
| 2032 | 99.61856 | 99.96241  | 99.41827 | 99.52135 |
| 2031 | 99.61716 | 99.96542  | 99.41764 | 99.52002 |
| 2030 | 99.61611 | 99.96845  | 99.41702 | 99.51868 |
| 2029 | 99.61335 | 99.97148  | 99.41642 | 99.51733 |
| 2028 | 99.61136 | 99.97453  | 99.41582 | 99.51596 |
| 2027 | 99.61055 | 99.97759  | 99.41523 | 99.51458 |
| 2026 | 99.61103 | 99.98066  | 99.41466 | 99.51318 |
| 2025 | 99.6126  | 99.98374  | 99.4141  | 99.51178 |
| 2024 | 99.61483 | 99.98683  | 99.41355 | 99.51036 |
| 2023 | 99.61728 | 99.98993  | 99.41301 | 99.50893 |
| 2022 | 99.6196  | 99.99303  | 99.41249 | 99.50749 |
| 2021 | 99.62166 | 99.99615  | 99.41198 | 99.50604 |
| 2020 | 99.62347 | 99.99927  | 99.41148 | 99.50459 |
| 2019 | 99.62512 | 100.0024  | 99.411   | 99.50313 |
| 2018 | 99.62663 | 100.00554 | 99.41054 | 99.50166 |
| 2017 | 99.62795 | 100.00868 | 99.41008 | 99.50019 |
| 2016 | 99.62897 | 100.01183 | 99.40965 | 99.49871 |
| 2015 | 99.62964 | 100.01498 | 99.40923 | 99.49723 |
| 2014 | 99.62998 | 100.01813 | 99.40882 | 99.49574 |
| 2013 | 99.63015 | 100.02129 | 99.40844 | 99.49426 |
| 2012 | 99.63034 | 100.02445 | 99.40807 | 99.49277 |
| 2011 | 99.63071 | 100.02762 | 99.40771 | 99.49128 |
| 2010 | 99.62297 | 100.03078 | 99.40738 | 99.48979 |
| 2009 | 99.62319 | 100.03395 | 99.40706 | 99.48831 |
| 2008 | 99.62241 | 100.03711 | 99.40676 | 99.48683 |
| 2007 | 99.62065 | 100.04028 | 99.40648 | 99.48535 |
| 2006 | 99.61804 | 100.04344 | 99.40622 | 99.48387 |
| 2005 | 99.6149  | 100.04661 | 99.40598 | 99.4824  |
| 2004 | 99.61158 | 100.04977 | 99.40576 | 99.48094 |
| 2003 | 99.60837 | 100.05292 | 99.40556 | 99.47948 |
| 2002 | 99.60546 | 100.05608 | 99.40537 | 99.47804 |
| 2001 | 99.60292 | 100.05923 | 99.40521 | 99.4766  |
| 2000 | 99.60076 | 100.06237 | 99.40508 | 99.47517 |
| 1999 | 99.59905 | 100.06551 | 99.40496 | 99.47375 |
| 1998 | 99.5979  | 100.06864 | 99.40486 | 99.47235 |
| 1997 | 99.59747 | 100.07177 | 99.40479 | 99.47096 |
| 1996 | 99.59784 | 100.07489 | 99.40474 | 99.46958 |

|      |          |           |          |          |
|------|----------|-----------|----------|----------|
| 1995 | 99.59897 | 100.078   | 99.40471 | 99.46822 |
| 1994 | 99.60066 | 100.0811  | 99.4047  | 99.46687 |
| 1993 | 99.60258 | 100.0842  | 99.40472 | 99.46554 |
| 1992 | 99.60446 | 100.08728 | 99.40476 | 99.46423 |
| 1991 | 99.60616 | 100.09035 | 99.40482 | 99.46294 |
| 1990 | 99.6078  | 100.09341 | 99.40491 | 99.46166 |
| 1989 | 99.6096  | 100.09646 | 99.40502 | 99.46041 |
| 1988 | 99.61182 | 100.09949 | 99.40516 | 99.45918 |
| 1987 | 99.6145  | 100.10252 | 99.40532 | 99.45798 |
| 1986 | 99.61745 | 100.10552 | 99.40551 | 99.45679 |
| 1985 | 99.62027 | 100.10852 | 99.40572 | 99.45564 |
| 1984 | 99.62251 | 100.11149 | 99.40596 | 99.4545  |
| 1983 | 99.6239  | 100.11445 | 99.40622 | 99.4534  |
| 1982 | 99.62577 | 100.1174  | 99.40651 | 99.45232 |
| 1981 | 99.62566 | 100.12033 | 99.40682 | 99.45127 |
| 1980 | 99.6252  | 100.12324 | 99.40716 | 99.45025 |
| 1979 | 99.62503 | 100.12613 | 99.40752 | 99.44926 |
| 1978 | 99.62563 | 100.129   | 99.40792 | 99.4483  |
| 1977 | 99.62721 | 100.13185 | 99.40834 | 99.44738 |
| 1976 | 99.62976 | 100.13467 | 99.40878 | 99.44649 |
| 1975 | 99.6331  | 100.13748 | 99.40925 | 99.44563 |
| 1974 | 99.63703 | 100.14027 | 99.40975 | 99.44481 |
| 1973 | 99.64141 | 100.14303 | 99.41028 | 99.44402 |
| 1972 | 99.64611 | 100.14577 | 99.41083 | 99.44327 |
| 1971 | 99.65102 | 100.14848 | 99.41141 | 99.44256 |
| 1970 | 99.6559  | 100.15117 | 99.41202 | 99.44188 |
| 1969 | 99.6605  | 100.15384 | 99.41266 | 99.44125 |
| 1968 | 99.6646  | 100.15648 | 99.41332 | 99.44066 |
| 1967 | 99.66806 | 100.15909 | 99.41401 | 99.44011 |
| 1966 | 99.67097 | 100.16167 | 99.41473 | 99.43959 |
| 1965 | 99.67351 | 100.16422 | 99.41547 | 99.43913 |
| 1964 | 99.67591 | 100.16675 | 99.41625 | 99.4387  |
| 1963 | 99.67825 | 100.16925 | 99.41705 | 99.43832 |
| 1962 | 99.6805  | 100.17171 | 99.41788 | 99.43799 |
| 1961 | 99.68241 | 100.17415 | 99.41873 | 99.4377  |
| 1960 | 99.68373 | 100.17655 | 99.41962 | 99.43746 |
| 1959 | 99.68426 | 100.17892 | 99.42053 | 99.43727 |
| 1958 | 99.68394 | 100.18126 | 99.42147 | 99.43712 |
| 1957 | 99.68286 | 100.18356 | 99.42244 | 99.43702 |
| 1956 | 99.68112 | 100.18583 | 99.42343 | 99.43697 |
| 1955 | 99.67879 | 100.18807 | 99.42445 | 99.43697 |

|      |          |           |          |          |
|------|----------|-----------|----------|----------|
| 1954 | 99.6758  | 100.19027 | 99.4255  | 99.43703 |
| 1953 | 99.67205 | 100.19243 | 99.42658 | 99.43713 |
| 1952 | 99.66744 | 100.19456 | 99.42768 | 99.43729 |
| 1951 | 99.66201 | 100.19665 | 99.42881 | 99.43749 |
| 1950 | 99.65603 | 100.1987  | 99.42997 | 99.43776 |
| 1949 | 99.64987 | 100.20071 | 99.43116 | 99.43807 |
| 1948 | 99.64396 | 100.20268 | 99.43237 | 99.43844 |
| 1947 | 99.63859 | 100.20462 | 99.43361 | 99.43886 |
| 1946 | 99.63383 | 100.20651 | 99.43487 | 99.43934 |
| 1945 | 99.62955 | 100.20836 | 99.43616 | 99.43987 |
| 1944 | 99.62186 | 100.21017 | 99.43748 | 99.44046 |
| 1943 | 99.61798 | 100.21193 | 99.43882 | 99.44111 |
| 1942 | 99.61421 | 100.21366 | 99.44019 | 99.44181 |
| 1941 | 99.61065 | 100.21534 | 99.44158 | 99.44257 |
| 1940 | 99.60742 | 100.21697 | 99.443   | 99.44339 |
| 1939 | 99.60453 | 100.21856 | 99.44445 | 99.44426 |
| 1938 | 99.60182 | 100.22011 | 99.44591 | 99.4452  |
| 1937 | 99.59891 | 100.22161 | 99.44741 | 99.44619 |
| 1936 | 99.59538 | 100.22306 | 99.44892 | 99.44724 |
| 1935 | 99.5909  | 100.22446 | 99.45047 | 99.44835 |
| 1934 | 99.58536 | 100.22582 | 99.45203 | 99.44951 |
| 1933 | 99.57895 | 100.22713 | 99.45362 | 99.45074 |
| 1932 | 99.57205 | 100.22839 | 99.45523 | 99.45202 |
| 1931 | 99.56518 | 100.2296  | 99.45686 | 99.45337 |
| 1930 | 99.55878 | 100.23076 | 99.45852 | 99.45477 |
| 1929 | 99.55324 | 100.23187 | 99.4602  | 99.45623 |
| 1928 | 99.54881 | 100.23292 | 99.4619  | 99.45776 |
| 1927 | 99.5457  | 100.23393 | 99.46362 | 99.45934 |
| 1926 | 99.5441  | 100.23488 | 99.46536 | 99.46098 |
| 1925 | 99.54416 | 100.23579 | 99.46712 | 99.46268 |
| 1924 | 99.54594 | 100.23663 | 99.4689  | 99.46444 |
| 1923 | 99.54931 | 100.23743 | 99.4707  | 99.46625 |
| 1922 | 99.55396 | 100.23817 | 99.47252 | 99.46813 |
| 1921 | 99.55944 | 100.23885 | 99.47436 | 99.47007 |
| 1920 | 99.56522 | 100.23948 | 99.47622 | 99.47206 |
| 1919 | 99.57089 | 100.24006 | 99.4781  | 99.47411 |
| 1918 | 99.57623 | 100.24058 | 99.47999 | 99.47622 |
| 1917 | 99.58118 | 100.24104 | 99.4819  | 99.47838 |
| 1916 | 99.58581 | 100.24144 | 99.48382 | 99.48061 |
| 1915 | 99.5902  | 100.24179 | 99.48576 | 99.48289 |
| 1914 | 99.59435 | 100.24208 | 99.48772 | 99.48522 |

|      |          |           |          |          |
|------|----------|-----------|----------|----------|
| 1913 | 99.5982  | 100.24231 | 99.48969 | 99.48762 |
| 1912 | 99.60167 | 100.24248 | 99.49168 | 99.49006 |
| 1911 | 99.60479 | 100.24259 | 99.49368 | 99.49256 |
| 1910 | 99.60772 | 100.24264 | 99.49569 | 99.49512 |
| 1909 | 99.61073 | 100.24263 | 99.49772 | 99.49773 |
| 1908 | 99.61411 | 100.24256 | 99.49975 | 99.50039 |
| 1907 | 99.61803 | 100.24243 | 99.5018  | 99.50311 |
| 1906 | 99.62244 | 100.24224 | 99.50386 | 99.50587 |
| 1905 | 99.65896 | 100.24198 | 99.50593 | 99.50869 |
| 1904 | 99.66328 | 100.24167 | 99.50801 | 99.51156 |
| 1903 | 99.66645 | 100.24129 | 99.51009 | 99.51448 |
| 1902 | 99.66839 | 100.24085 | 99.51219 | 99.51744 |
| 1901 | 99.66918 | 100.24034 | 99.51429 | 99.52046 |
| 1900 | 99.66898 | 100.23977 | 99.5164  | 99.52352 |
| 1899 | 99.66797 | 100.23914 | 99.51852 | 99.52662 |
| 1898 | 99.66628 | 100.23844 | 99.52064 | 99.52977 |
| 1897 | 99.664   | 100.23768 | 99.52277 | 99.53297 |
| 1896 | 99.66121 | 100.23685 | 99.5249  | 99.5362  |
| 1895 | 99.6581  | 100.23596 | 99.52703 | 99.53948 |
| 1894 | 99.65495 | 100.235   | 99.52917 | 99.5428  |
| 1893 | 99.65214 | 100.23398 | 99.53131 | 99.54616 |
| 1892 | 99.65002 | 100.23288 | 99.53345 | 99.54956 |
| 1891 | 99.64886 | 100.23173 | 99.53559 | 99.55299 |
| 1890 | 99.64871 | 100.2305  | 99.53773 | 99.55646 |
| 1889 | 99.64947 | 100.22921 | 99.53987 | 99.55997 |
| 1888 | 99.6261  | 100.22786 | 99.542   | 99.56351 |
| 1887 | 99.62871 | 100.22643 | 99.54414 | 99.56708 |
| 1886 | 99.63051 | 100.22494 | 99.54627 | 99.57068 |
| 1885 | 99.63132 | 100.22338 | 99.5484  | 99.57431 |
| 1884 | 99.631   | 100.22175 | 99.55052 | 99.57797 |
| 1883 | 99.62948 | 100.22005 | 99.55263 | 99.58165 |
| 1882 | 99.62665 | 100.21828 | 99.55474 | 99.58536 |
| 1881 | 99.62241 | 100.21645 | 99.55685 | 99.58909 |
| 1880 | 99.61674 | 100.21454 | 99.55894 | 99.59284 |
| 1879 | 99.60977 | 100.21257 | 99.56103 | 99.59662 |
| 1878 | 99.60182 | 100.21053 | 99.5631  | 99.60041 |
| 1877 | 99.59333 | 100.20842 | 99.56517 | 99.60422 |
| 1876 | 99.5848  | 100.20624 | 99.56722 | 99.60804 |
| 1875 | 99.57665 | 100.20398 | 99.56926 | 99.61188 |
| 1874 | 99.56914 | 100.20166 | 99.57129 | 99.61573 |
| 1873 | 99.56236 | 100.19927 | 99.5733  | 99.61959 |

|      |          |           |          |          |
|------|----------|-----------|----------|----------|
| 1872 | 99.55629 | 100.19681 | 99.5753  | 99.62345 |
| 1871 | 99.55089 | 100.19428 | 99.57728 | 99.62733 |
| 1870 | 99.54621 | 100.19168 | 99.57925 | 99.6312  |
| 1869 | 99.54237 | 100.18901 | 99.5812  | 99.63508 |
| 1868 | 99.53946 | 100.18627 | 99.58313 | 99.63896 |
| 1867 | 99.53749 | 100.18346 | 99.58503 | 99.64284 |
| 1866 | 99.53629 | 100.18058 | 99.58692 | 99.64671 |
| 1865 | 99.53554 | 100.17763 | 99.58879 | 99.65058 |
| 1864 | 99.53491 | 100.17461 | 99.59064 | 99.65444 |
| 1863 | 99.5341  | 100.17151 | 99.59246 | 99.65829 |
| 1862 | 99.53299 | 100.16835 | 99.59426 | 99.66213 |
| 1861 | 99.53161 | 100.16512 | 99.59603 | 99.66595 |
| 1860 | 99.53011 | 100.16182 | 99.59778 | 99.66976 |
| 1859 | 99.52866 | 100.15844 | 99.5995  | 99.67355 |
| 1858 | 99.52737 | 100.155   | 99.6012  | 99.67732 |
| 1857 | 99.52627 | 100.15148 | 99.60286 | 99.68106 |
| 1856 | 99.52539 | 100.1479  | 99.6045  | 99.68478 |
| 1855 | 99.52475 | 100.14425 | 99.6061  | 99.68848 |
| 1854 | 99.52446 | 100.14052 | 99.60767 | 99.69214 |
| 1853 | 99.52467 | 100.13673 | 99.60921 | 99.69577 |
| 1852 | 99.52555 | 100.13286 | 99.61072 | 99.69937 |
| 1851 | 99.5272  | 100.12893 | 99.6122  | 99.70293 |
| 1850 | 99.5296  | 100.12493 | 99.61363 | 99.70645 |
| 1849 | 99.53263 | 100.12086 | 99.61504 | 99.70993 |
| 1848 | 99.5361  | 100.11671 | 99.6164  | 99.71336 |
| 1847 | 99.53983 | 100.1125  | 99.61773 | 99.71675 |
| 1846 | 99.54376 | 100.10822 | 99.61902 | 99.72009 |
| 1845 | 99.54788 | 100.10388 | 99.62026 | 99.72337 |
| 1844 | 99.55226 | 100.09946 | 99.62147 | 99.72661 |
| 1843 | 99.55693 | 100.09497 | 99.62264 | 99.72978 |
| 1842 | 99.56185 | 100.09042 | 99.62376 | 99.7329  |
| 1841 | 99.56693 | 100.0858  | 99.62484 | 99.73596 |
| 1840 | 99.5721  | 100.08111 | 99.62588 | 99.73895 |
| 1839 | 99.57735 | 100.07635 | 99.62687 | 99.74187 |
| 1838 | 99.58281 | 100.07153 | 99.62781 | 99.74473 |
| 1837 | 99.58868 | 100.06664 | 99.6287  | 99.74751 |
| 1836 | 99.59516 | 100.06168 | 99.62955 | 99.75022 |
| 1835 | 99.60237 | 100.05666 | 99.63035 | 99.75285 |
| 1834 | 99.61025 | 100.05157 | 99.6311  | 99.7554  |
| 1833 | 99.61861 | 100.04641 | 99.6318  | 99.75787 |
| 1832 | 99.62984 | 100.04119 | 99.63245 | 99.76025 |

|      |          |           |          |          |
|------|----------|-----------|----------|----------|
| 1831 | 99.63806 | 100.03591 | 99.63304 | 99.76255 |
| 1830 | 99.6455  | 100.03056 | 99.63358 | 99.76475 |
| 1829 | 99.65215 | 100.02514 | 99.63407 | 99.76686 |
| 1828 | 99.65801 | 100.01966 | 99.6345  | 99.76888 |
| 1827 | 99.66308 | 100.01412 | 99.63487 | 99.77079 |
| 1826 | 99.66724 | 100.00851 | 99.63519 | 99.77261 |
| 1825 | 99.67033 | 100.00284 | 99.63545 | 99.77432 |
| 1824 | 99.67222 | 99.99711  | 99.63565 | 99.77592 |
| 1823 | 99.67291 | 99.99131  | 99.63579 | 99.77741 |
| 1822 | 99.6726  | 99.98546  | 99.63587 | 99.77879 |
| 1821 | 99.67159 | 99.97954  | 99.63589 | 99.78006 |
| 1820 | 99.6702  | 99.97356  | 99.63584 | 99.78121 |
| 1819 | 99.66867 | 99.96752  | 99.63574 | 99.78224 |
| 1818 | 99.66704 | 99.96142  | 99.63557 | 99.78314 |
| 1817 | 99.66518 | 99.95526  | 99.63533 | 99.78392 |
| 1816 | 99.6629  | 99.94905  | 99.63503 | 99.78457 |
| 1815 | 99.66005 | 99.94277  | 99.63467 | 99.78509 |
| 1814 | 99.65664 | 99.93643  | 99.63424 | 99.78547 |
| 1813 | 99.6528  | 99.93004  | 99.63373 | 99.78572 |
| 1812 | 99.64879 | 99.92359  | 99.63317 | 99.78583 |
| 1811 | 99.64481 | 99.91708  | 99.63253 | 99.7858  |
| 1810 | 99.64103 | 99.91052  | 99.63182 | 99.78562 |
| 1809 | 99.63748 | 99.9039   | 99.63104 | 99.78529 |
| 1808 | 99.63414 | 99.89723  | 99.63019 | 99.78482 |
| 1807 | 99.63099 | 99.8905   | 99.62927 | 99.78419 |
| 1806 | 99.62814 | 99.88372  | 99.62827 | 99.78341 |
| 1805 | 99.62578 | 99.87688  | 99.6272  | 99.78247 |
| 1804 | 99.62524 | 99.86999  | 99.62606 | 99.78136 |
| 1803 | 99.62399 | 99.86305  | 99.62484 | 99.7801  |
| 1802 | 99.6228  | 99.85606  | 99.62355 | 99.77867 |
| 1801 | 99.62167 | 99.84902  | 99.62218 | 99.77707 |
| 1800 | 99.62054 | 99.84192  | 99.62073 | 99.7753  |
| 1799 | 99.61938 | 99.83478  | 99.61921 | 99.77336 |
| 1798 | 99.61824 | 99.82759  | 99.6176  | 99.77124 |
| 1797 | 99.61725 | 99.82035  | 99.61592 | 99.76894 |
| 1796 | 99.61654 | 99.81306  | 99.61416 | 99.76646 |
| 1795 | 99.61619 | 99.80572  | 99.61232 | 99.7638  |
| 1794 | 99.61614 | 99.79834  | 99.6104  | 99.76096 |
| 1793 | 99.61621 | 99.79091  | 99.6084  | 99.75792 |
| 1792 | 99.61622 | 99.78343  | 99.60632 | 99.7547  |
| 1791 | 99.61602 | 99.77591  | 99.60416 | 99.75128 |

|      |          |          |          |          |
|------|----------|----------|----------|----------|
| 1790 | 99.61563 | 99.76835 | 99.60191 | 99.74767 |
| 1789 | 99.61517 | 99.76075 | 99.59958 | 99.74386 |
| 1788 | 99.61479 | 99.7531  | 99.59716 | 99.73986 |
| 1787 | 99.61462 | 99.74541 | 99.59467 | 99.73565 |
| 1786 | 99.61468 | 99.73768 | 99.59209 | 99.73123 |
| 1785 | 99.6149  | 99.7299  | 99.58942 | 99.72661 |
| 1784 | 99.61522 | 99.72209 | 99.58667 | 99.72178 |
| 1783 | 99.61568 | 99.71424 | 99.58383 | 99.71675 |
| 1782 | 99.61645 | 99.70635 | 99.58091 | 99.7115  |
| 1781 | 99.61706 | 99.69843 | 99.5779  | 99.70603 |
| 1780 | 99.6184  | 99.69047 | 99.5748  | 99.70035 |
| 1779 | 99.61949 | 99.68247 | 99.57162 | 99.69445 |
| 1778 | 99.62032 | 99.67444 | 99.56835 | 99.68833 |
| 1777 | 99.62069 | 99.66637 | 99.56499 | 99.68199 |
| 1776 | 99.62041 | 99.65827 | 99.56155 | 99.67542 |
| 1775 | 99.61944 | 99.65013 | 99.55801 | 99.66863 |
| 1774 | 99.61797 | 99.64197 | 99.55439 | 99.66161 |
| 1773 | 99.61638 | 99.63377 | 99.55068 | 99.65436 |
| 1772 | 99.61505 | 99.62555 | 99.54688 | 99.64688 |
| 1771 | 99.61424 | 99.61729 | 99.54299 | 99.63917 |
| 1770 | 99.61392 | 99.60901 | 99.53901 | 99.63122 |
| 1769 | 99.61381 | 99.60069 | 99.53494 | 99.62304 |
| 1768 | 99.61351 | 99.59235 | 99.53079 | 99.61462 |
| 1767 | 99.61271 | 99.58399 | 99.52654 | 99.60596 |
| 1766 | 99.61126 | 99.5756  | 99.5222  | 99.59706 |
| 1765 | 99.60925 | 99.56718 | 99.51778 | 99.58792 |
| 1764 | 99.60684 | 99.55874 | 99.51326 | 99.57853 |
| 1763 | 99.60413 | 99.55028 | 99.50865 | 99.5689  |
| 1762 | 99.601   | 99.5418  | 99.50396 | 99.55903 |
| 1761 | 99.61066 | 99.53329 | 99.49917 | 99.54891 |
| 1760 | 99.61111 | 99.52477 | 99.4943  | 99.53853 |
| 1759 | 99.61692 | 99.51622 | 99.48933 | 99.52792 |
| 1758 | 99.62492 | 99.50766 | 99.48427 | 99.51705 |
| 1757 | 99.63209 | 99.49908 | 99.47913 | 99.50592 |
| 1756 | 99.63544 | 99.49049 | 99.47389 | 99.49455 |
| 1755 | 99.63183 | 99.48187 | 99.46857 | 99.48292 |
| 1754 | 99.61786 | 99.47325 | 99.46315 | 99.47104 |
| 1753 | 99.56657 | 99.46461 | 99.45764 | 99.45891 |
| 1752 | 99.52843 | 99.45595 | 99.45205 | 99.44652 |
| 1751 | 99.47984 | 99.44729 | 99.44637 | 99.43387 |
| 1750 | 99.41966 | 99.43861 | 99.4406  | 99.42097 |

|      |          |          |          |          |
|------|----------|----------|----------|----------|
| 1749 | 99.34683 | 99.42992 | 99.43473 | 99.4078  |
| 1748 | 99.26034 | 99.42122 | 99.42878 | 99.39438 |
| 1747 | 99.15901 | 99.41252 | 99.42275 | 99.3807  |
| 1746 | 99.04136 | 99.40381 | 99.41662 | 99.36677 |
| 1745 | 98.90548 | 99.39509 | 99.41041 | 99.35257 |
| 1744 | 98.7491  | 99.38636 | 99.40411 | 99.33811 |
| 1743 | 98.56969 | 99.37763 | 99.39772 | 99.3234  |
| 1742 | 98.36465 | 99.3689  | 99.39124 | 99.30842 |
| 1741 | 98.13139 | 99.36016 | 99.38468 | 99.29318 |
| 1740 | 97.86737 | 99.35142 | 99.37804 | 99.27769 |
| 1739 | 97.57001 | 99.34268 | 99.3713  | 99.26193 |
| 1738 | 97.23676 | 99.33394 | 99.36449 | 99.24591 |
| 1737 | 96.86512 | 99.3252  | 99.35758 | 99.22963 |
| 1736 | 96.45283 | 99.31646 | 99.3506  | 99.2131  |
| 1735 | 95.99801 | 99.30773 | 99.34353 | 99.1963  |
| 1734 | 95.49919 | 99.299   | 99.33637 | 99.17924 |
| 1733 | 94.95519 | 99.29027 | 99.32914 | 99.16192 |
| 1732 | 94.36481 | 99.28155 | 99.32182 | 99.14435 |
| 1731 | 93.7265  | 99.27283 | 99.31442 | 99.12651 |
| 1730 | 93.03816 | 99.26413 | 99.30694 | 99.10842 |
| 1729 | 92.29711 | 99.25543 | 99.29938 | 99.09007 |
| 1728 | 91.50048 | 99.24674 | 99.29174 | 99.07147 |
| 1727 | 90.64575 | 99.23806 | 99.28402 | 99.05261 |
| 1726 | 89.73118 | 99.22939 | 99.27622 | 99.03349 |
| 1725 | 88.75601 | 99.22073 | 99.26834 | 99.01412 |
| 1724 | 87.72026 | 99.21209 | 99.26039 | 98.9945  |
| 1723 | 86.62438 | 99.20345 | 99.25236 | 98.97462 |
| 1722 | 85.46895 | 99.19484 | 99.24425 | 98.95449 |
| 1721 | 84.25459 | 99.18624 | 99.23607 | 98.93411 |
| 1720 | 82.98203 | 99.17766 | 99.22782 | 98.91348 |
| 1719 | 81.65233 | 99.16909 | 99.21949 | 98.89261 |
| 1718 | 80.267   | 99.16054 | 99.21109 | 98.87149 |
| 1717 | 78.82806 | 99.15202 | 99.20262 | 98.85012 |
| 1716 | 77.33786 | 99.14351 | 99.19408 | 98.82851 |
| 1715 | 75.79893 | 99.13502 | 99.18547 | 98.80665 |
| 1714 | 74.21382 | 99.12656 | 99.17679 | 98.78456 |
| 1713 | 72.58514 | 99.11812 | 99.16804 | 98.76222 |
| 1712 | 70.91572 | 99.10971 | 99.15922 | 98.73965 |
| 1711 | 69.20881 | 99.10131 | 99.15034 | 98.71684 |
| 1710 | 67.46813 | 99.09295 | 99.14139 | 98.69379 |
| 1709 | 65.6979  | 99.08461 | 99.13238 | 98.67052 |



|      |          |          |          |          |
|------|----------|----------|----------|----------|
| 1708 | 63.90259 | 99.0763  | 99.1233  | 98.64701 |
| 1707 | 62.08678 | 99.06802 | 99.11416 | 98.62327 |
| 1706 | 60.25494 | 99.05977 | 99.10496 | 98.59931 |
| 1705 | 58.41145 | 99.05154 | 99.0957  | 98.57512 |
| 1704 | 56.56063 | 99.04335 | 99.08638 | 98.55071 |
| 1703 | 54.70689 | 99.03519 | 99.07701 | 98.52608 |
| 1702 | 52.85492 | 99.02707 | 99.06757 | 98.50123 |
| 1701 | 51.0097  | 99.01898 | 99.05808 | 98.47617 |
| 1700 | 49.17645 | 99.01092 | 99.04854 | 98.45089 |
| 1699 | 47.36041 | 99.0029  | 99.03894 | 98.4254  |
| 1698 | 45.5666  | 98.99492 | 99.02928 | 98.3997  |
| 1697 | 43.79967 | 98.98697 | 99.01958 | 98.3738  |
| 1696 | 42.06381 | 98.97906 | 99.00983 | 98.34769 |
| 1695 | 40.36283 | 98.97119 | 99.00002 | 98.32138 |
| 1694 | 38.70021 | 98.96336 | 98.99017 | 98.29487 |
| 1693 | 37.07903 | 98.95557 | 98.98027 | 98.26817 |
| 1692 | 35.50196 | 98.94783 | 98.97033 | 98.24128 |
| 1691 | 33.97118 | 98.94012 | 98.96034 | 98.21419 |
| 1690 | 32.48833 | 98.93246 | 98.95031 | 98.18692 |
| 1689 | 31.05472 | 98.92485 | 98.94024 | 98.15946 |
| 1688 | 29.67138 | 98.91728 | 98.93013 | 98.13182 |
| 1687 | 28.33932 | 98.90975 | 98.91998 | 98.10401 |
| 1686 | 27.05961 | 98.90227 | 98.90979 | 98.07602 |
| 1685 | 25.83342 | 98.89484 | 98.89956 | 98.04786 |
| 1684 | 24.66176 | 98.88746 | 98.8893  | 98.01953 |
| 1683 | 23.54532 | 98.88012 | 98.879   | 97.99103 |
| 1682 | 22.48421 | 98.87284 | 98.86868 | 97.96237 |
| 1681 | 21.47795 | 98.86561 | 98.85832 | 97.93356 |
| 1680 | 20.52562 | 98.85842 | 98.84793 | 97.90459 |
| 1679 | 19.626   | 98.85129 | 98.83751 | 97.87547 |
| 1678 | 18.77773 | 98.84422 | 98.82707 | 97.8462  |
| 1677 | 17.97936 | 98.83719 | 98.8166  | 97.81678 |
| 1676 | 17.22937 | 98.83022 | 98.8061  | 97.78723 |
| 1675 | 16.52618 | 98.82331 | 98.79559 | 97.75754 |
| 1674 | 15.86814 | 98.81645 | 98.78505 | 97.72771 |
| 1673 | 15.25357 | 98.80965 | 98.77449 | 97.69776 |
| 1672 | 14.68082 | 98.80291 | 98.76391 | 97.66767 |
| 1671 | 14.14828 | 98.79622 | 98.75332 | 97.63747 |
| 1670 | 13.65445 | 98.78959 | 98.74271 | 97.60715 |
| 1669 | 13.19791 | 98.78303 | 98.73208 | 97.57671 |
| 1668 | 12.77728 | 98.77652 | 98.72145 | 97.54616 |

|      |          |          |          |          |
|------|----------|----------|----------|----------|
| 1667 | 12.39121 | 98.77007 | 98.7108  | 97.51551 |
| 1666 | 12.03837 | 98.76368 | 98.70014 | 97.48475 |
| 1665 | 11.71744 | 98.75736 | 98.68947 | 97.4539  |
| 1664 | 11.42716 | 98.7511  | 98.6788  | 97.42295 |
| 1663 | 11.16635 | 98.7449  | 98.66812 | 97.39191 |
| 1662 | 10.93401 | 98.73877 | 98.65744 | 97.36078 |
| 1661 | 10.72921 | 98.7327  | 98.64676 | 97.32958 |
| 1660 | 10.55117 | 98.72669 | 98.63607 | 97.29829 |
| 1659 | 10.39918 | 98.72076 | 98.62539 | 97.26693 |
| 1658 | 10.27258 | 98.71488 | 98.6147  | 97.2355  |
| 1657 | 10.17073 | 98.70908 | 98.60402 | 97.20401 |
| 1656 | 10.09303 | 98.70334 | 98.59335 | 97.17245 |
| 1655 | 10.03893 | 98.69767 | 98.58268 | 97.14084 |
| 1654 | 10.00801 | 98.69207 | 98.57202 | 97.10918 |
| 1653 | 10       | 98.68654 | 98.56137 | 97.07747 |
| 1652 | 10.01473 | 98.68108 | 98.55074 | 97.04571 |
| 1651 | 10.05214 | 98.67569 | 98.54011 | 97.01392 |
| 1650 | 10.11221 | 98.67037 | 98.5295  | 96.98209 |
| 1649 | 10.19495 | 98.66512 | 98.51891 | 96.95023 |
| 1648 | 10.30043 | 98.65994 | 98.50833 | 96.91835 |
| 1647 | 10.42874 | 98.65484 | 98.49777 | 96.88644 |
| 1646 | 10.58011 | 98.6498  | 98.48723 | 96.85452 |
| 1645 | 10.75482 | 98.64484 | 98.47671 | 96.82259 |
| 1644 | 10.95321 | 98.63996 | 98.46622 | 96.79065 |
| 1643 | 11.17567 | 98.63515 | 98.45575 | 96.7587  |
| 1642 | 11.42253 | 98.63041 | 98.44531 | 96.72676 |
| 1641 | 11.69409 | 98.62575 | 98.43489 | 96.69482 |
| 1640 | 11.99056 | 98.62116 | 98.4245  | 96.6629  |
| 1639 | 12.3121  | 98.61665 | 98.41415 | 96.63099 |
| 1638 | 12.65891 | 98.61222 | 98.40383 | 96.5991  |
| 1637 | 13.03119 | 98.60786 | 98.39354 | 96.56723 |
| 1636 | 13.42913 | 98.60358 | 98.38328 | 96.53539 |
| 1635 | 13.85291 | 98.59938 | 98.37307 | 96.50359 |
| 1634 | 14.30271 | 98.59525 | 98.36289 | 96.47183 |
| 1633 | 14.77869 | 98.59121 | 98.35275 | 96.4401  |
| 1632 | 15.28106 | 98.58724 | 98.34265 | 96.40843 |
| 1631 | 15.81005 | 98.58335 | 98.33259 | 96.37681 |
| 1630 | 16.36588 | 98.57954 | 98.32258 | 96.34524 |
| 1629 | 16.94878 | 98.5758  | 98.31261 | 96.31373 |
| 1628 | 17.5589  | 98.57215 | 98.30269 | 96.2823  |
| 1627 | 18.19633 | 98.56858 | 98.29281 | 96.25093 |

|      |          |          |          |          |
|------|----------|----------|----------|----------|
| 1626 | 18.86102 | 98.56509 | 98.28299 | 96.21963 |
| 1625 | 19.55281 | 98.56167 | 98.27322 | 96.18842 |
| 1624 | 20.2714  | 98.55834 | 98.2635  | 96.15729 |
| 1623 | 21.0164  | 98.55509 | 98.25383 | 96.12625 |
| 1622 | 21.78733 | 98.55192 | 98.24422 | 96.0953  |
| 1621 | 22.58367 | 98.54883 | 98.23466 | 96.06445 |
| 1620 | 23.40484 | 98.54582 | 98.22516 | 96.0337  |
| 1619 | 24.25021 | 98.5429  | 98.21572 | 96.00306 |
| 1618 | 25.11904 | 98.54005 | 98.20634 | 95.97253 |
| 1617 | 26.01046 | 98.53729 | 98.19702 | 95.94211 |
| 1616 | 26.92348 | 98.53461 | 98.18776 | 95.91181 |
| 1615 | 27.85695 | 98.53201 | 98.17857 | 95.88164 |
| 1614 | 28.80962 | 98.5295  | 98.16944 | 95.8516  |
| 1613 | 29.78017 | 98.52707 | 98.16038 | 95.82169 |
| 1612 | 30.76724 | 98.52472 | 98.15139 | 95.79191 |
| 1611 | 31.7694  | 98.52245 | 98.14246 | 95.76228 |
| 1610 | 32.78513 | 98.52026 | 98.13361 | 95.73279 |
| 1609 | 33.81278 | 98.51816 | 98.12482 | 95.70346 |
| 1608 | 34.85055 | 98.51614 | 98.11611 | 95.67428 |
| 1607 | 35.8966  | 98.5142  | 98.10747 | 95.64525 |
| 1606 | 36.94902 | 98.51235 | 98.0989  | 95.61639 |
| 1605 | 38.00595 | 98.51058 | 98.09042 | 95.58769 |
| 1604 | 39.06563 | 98.50889 | 98.082   | 95.55917 |
| 1603 | 40.12641 | 98.50728 | 98.07367 | 95.53082 |
| 1602 | 41.18679 | 98.50576 | 98.06541 | 95.50265 |
| 1601 | 42.24538 | 98.50432 | 98.05723 | 95.47466 |
| 1600 | 43.30081 | 98.50296 | 98.04913 | 95.44686 |
| 1599 | 44.35167 | 98.50168 | 98.04112 | 95.41925 |
| 1598 | 45.39646 | 98.50049 | 98.03319 | 95.39183 |
| 1597 | 46.43368 | 98.49938 | 98.02534 | 95.36461 |
| 1596 | 47.46187 | 98.49835 | 98.01757 | 95.33759 |
| 1595 | 48.47968 | 98.49741 | 98.00989 | 95.31078 |
| 1594 | 49.48599 | 98.49654 | 98.0023  | 95.28417 |
| 1593 | 50.47988 | 98.49576 | 97.99479 | 95.25778 |
| 1592 | 51.46068 | 98.49506 | 97.98737 | 95.23161 |
| 1591 | 52.42795 | 98.49445 | 97.98004 | 95.20565 |
| 1590 | 53.38137 | 98.49391 | 97.97279 | 95.17992 |
| 1589 | 54.32067 | 98.49345 | 97.96564 | 95.15441 |
| 1588 | 55.24555 | 98.49308 | 97.95858 | 95.12913 |
| 1587 | 56.15569 | 98.49279 | 97.95161 | 95.10409 |
| 1586 | 57.05078 | 98.49258 | 97.94473 | 95.07928 |

|      |          |          |          |          |
|------|----------|----------|----------|----------|
| 1585 | 57.93055 | 98.49244 | 97.93795 | 95.05472 |
| 1584 | 58.7947  | 98.49239 | 97.93126 | 95.03039 |
| 1583 | 59.64296 | 98.49242 | 97.92466 | 95.00631 |
| 1582 | 60.47499 | 98.49253 | 97.91816 | 94.98248 |
| 1581 | 61.29052 | 98.49272 | 97.91175 | 94.9589  |
| 1580 | 62.08937 | 98.49299 | 97.90544 | 94.93557 |
| 1579 | 62.87151 | 98.49333 | 97.89922 | 94.91251 |
| 1578 | 63.63706 | 98.49376 | 97.8931  | 94.8897  |
| 1577 | 64.38622 | 98.49426 | 97.88708 | 94.86715 |
| 1576 | 65.11913 | 98.49484 | 97.88115 | 94.84487 |
| 1575 | 65.83587 | 98.4955  | 97.87533 | 94.82286 |
| 1574 | 66.53643 | 98.49624 | 97.8696  | 94.80112 |
| 1573 | 67.2208  | 98.49705 | 97.86397 | 94.77965 |
| 1572 | 67.88906 | 98.49794 | 97.85843 | 94.75846 |
| 1571 | 68.54148 | 98.4989  | 97.853   | 94.73754 |
| 1570 | 69.17849 | 98.49994 | 97.84767 | 94.71691 |
| 1569 | 69.80064 | 98.50106 | 97.84244 | 94.69655 |
| 1568 | 70.4085  | 98.50225 | 97.8373  | 94.67648 |
| 1567 | 71.00256 | 98.50352 | 97.83227 | 94.6567  |
| 1566 | 71.58318 | 98.50486 | 97.82734 | 94.6372  |
| 1565 | 72.15067 | 98.50627 | 97.82251 | 94.61799 |
| 1564 | 72.70533 | 98.50775 | 97.81777 | 94.59908 |
| 1563 | 73.2475  | 98.50931 | 97.81314 | 94.58045 |
| 1562 | 73.7776  | 98.51094 | 97.80861 | 94.56213 |
| 1561 | 74.29615 | 98.51265 | 97.80418 | 94.54409 |
| 1560 | 74.80359 | 98.51442 | 97.79985 | 94.52636 |
| 1559 | 75.30013 | 98.51626 | 97.79562 | 94.50893 |
| 1558 | 75.78567 | 98.51818 | 97.79149 | 94.49179 |
| 1557 | 76.25986 | 98.52016 | 97.78747 | 94.47496 |
| 1556 | 76.72238 | 98.52222 | 97.78354 | 94.45843 |
| 1555 | 77.17313 | 98.52434 | 97.77971 | 94.44221 |
| 1554 | 77.6123  | 98.52653 | 97.77598 | 94.42629 |
| 1553 | 78.04023 | 98.52878 | 97.77235 | 94.41068 |
| 1552 | 78.45717 | 98.5311  | 97.76882 | 94.39537 |
| 1551 | 78.86306 | 98.53349 | 97.76539 | 94.38037 |
| 1550 | 79.25753 | 98.53595 | 97.76205 | 94.36569 |
| 1549 | 79.63998 | 98.53847 | 97.75882 | 94.35131 |
| 1548 | 80.00968 | 98.54105 | 97.75568 | 94.33723 |
| 1547 | 80.36586 | 98.5437  | 97.75264 | 94.32347 |
| 1546 | 80.70774 | 98.54641 | 97.7497  | 94.31002 |
| 1545 | 81.0344  | 98.54918 | 97.74685 | 94.29689 |

|      |          |          |          |          |
|------|----------|----------|----------|----------|
| 1544 | 81.3448  | 98.55202 | 97.7441  | 94.28406 |
| 1543 | 81.63763 | 98.55491 | 97.74145 | 94.27154 |
| 1542 | 81.91133 | 98.55787 | 97.73889 | 94.25933 |
| 1541 | 82.16417 | 98.56088 | 97.73642 | 94.24744 |
| 1540 | 82.39449 | 98.56396 | 97.73405 | 94.23586 |
| 1539 | 82.60096 | 98.56709 | 97.73177 | 94.22458 |
| 1538 | 82.78281 | 98.57028 | 97.72959 | 94.21362 |
| 1537 | 82.93983 | 98.57352 | 97.72749 | 94.20297 |
| 1536 | 83.07222 | 98.57683 | 97.72549 | 94.19263 |
| 1535 | 83.18043 | 98.58019 | 97.72357 | 94.18259 |
| 1534 | 83.26511 | 98.5836  | 97.72175 | 94.17287 |
| 1533 | 83.32716 | 98.58706 | 97.72001 | 94.16345 |
| 1532 | 83.36771 | 98.59058 | 97.71836 | 94.15434 |
| 1531 | 83.38812 | 98.59416 | 97.7168  | 94.14554 |
| 1530 | 83.38989 | 98.59778 | 97.71532 | 94.13704 |
| 1529 | 83.37452 | 98.60145 | 97.71393 | 94.12884 |
| 1528 | 83.34333 | 98.60518 | 97.71262 | 94.12095 |
| 1527 | 83.29736 | 98.60895 | 97.71139 | 94.11336 |
| 1526 | 83.23736 | 98.61277 | 97.71025 | 94.10607 |
| 1525 | 83.16385 | 98.61664 | 97.70918 | 94.09908 |
| 1524 | 83.07725 | 98.62056 | 97.7082  | 94.09239 |
| 1523 | 82.97795 | 98.62452 | 97.70729 | 94.08599 |
| 1522 | 82.86639 | 98.62853 | 97.70646 | 94.07989 |
| 1521 | 82.74298 | 98.63258 | 97.70571 | 94.07408 |
| 1520 | 82.60796 | 98.63667 | 97.70503 | 94.06856 |
| 1519 | 82.4612  | 98.64081 | 97.70443 | 94.06333 |
| 1518 | 82.30212 | 98.64499 | 97.70389 | 94.05839 |
| 1517 | 82.12971 | 98.64921 | 97.70343 | 94.05373 |
| 1516 | 81.94269 | 98.65347 | 97.70304 | 94.04936 |
| 1515 | 81.73976 | 98.65777 | 97.70271 | 94.04527 |
| 1514 | 81.51967 | 98.6621  | 97.70246 | 94.04145 |
| 1513 | 81.28119 | 98.66648 | 97.70226 | 94.03791 |
| 1512 | 81.02289 | 98.67089 | 97.70214 | 94.03464 |
| 1511 | 80.74299 | 98.67533 | 97.70207 | 94.03165 |
| 1510 | 80.43944 | 98.67982 | 97.70206 | 94.02892 |
| 1509 | 80.11019 | 98.68433 | 97.70212 | 94.02646 |
| 1508 | 79.75363 | 98.68888 | 97.70223 | 94.02426 |
| 1507 | 79.36896 | 98.69346 | 97.7024  | 94.02233 |
| 1506 | 78.95626 | 98.69807 | 97.70262 | 94.02065 |
| 1505 | 78.51643 | 98.70271 | 97.7029  | 94.01922 |
| 1504 | 78.05093 | 98.70738 | 97.70323 | 94.01804 |

|      |          |          |          |          |
|------|----------|----------|----------|----------|
| 1503 | 77.56163 | 98.71208 | 97.7036  | 94.01712 |
| 1502 | 77.0509  | 98.71681 | 97.70403 | 94.01644 |
| 1501 | 76.52168 | 98.72156 | 97.7045  | 94.01599 |
| 1500 | 75.97754 | 98.72634 | 97.70502 | 94.01579 |
| 1499 | 75.42258 | 98.73114 | 97.70557 | 94.01582 |
| 1498 | 74.86118 | 98.73597 | 97.70618 | 94.01609 |
| 1497 | 74.29769 | 98.74082 | 97.70681 | 94.01658 |
| 1496 | 73.73602 | 98.74569 | 97.70749 | 94.01729 |
| 1495 | 73.17932 | 98.75058 | 97.7082  | 94.01823 |
| 1494 | 72.62968 | 98.75549 | 97.70895 | 94.01938 |
| 1493 | 72.0881  | 98.76042 | 97.70973 | 94.02075 |
| 1492 | 71.55452 | 98.76537 | 97.71054 | 94.02232 |
| 1491 | 71.02797 | 98.77034 | 97.71137 | 94.0241  |
| 1490 | 70.50668 | 98.77532 | 97.71223 | 94.02607 |
| 1489 | 69.98813 | 98.78032 | 97.71312 | 94.02825 |
| 1488 | 69.46931 | 98.78533 | 97.71403 | 94.03062 |
| 1487 | 68.94687 | 98.79036 | 97.71495 | 94.03317 |
| 1486 | 68.41741 | 98.79539 | 97.7159  | 94.03591 |
| 1485 | 67.87767 | 98.80044 | 97.71686 | 94.03883 |
| 1484 | 67.32467 | 98.8055  | 97.71784 | 94.04193 |
| 1483 | 66.75582 | 98.81057 | 97.71883 | 94.04519 |
| 1482 | 66.16891 | 98.81565 | 97.71982 | 94.04862 |
| 1481 | 65.56212 | 98.82073 | 97.72083 | 94.05221 |
| 1480 | 64.93398 | 98.82582 | 97.72184 | 94.05596 |
| 1479 | 64.28333 | 98.83092 | 97.72285 | 94.05987 |
| 1478 | 63.60936 | 98.83602 | 97.72387 | 94.06391 |
| 1477 | 62.9116  | 98.84112 | 97.72488 | 94.06811 |
| 1476 | 62.19009 | 98.84623 | 97.72589 | 94.07243 |
| 1475 | 61.44544 | 98.85134 | 97.7269  | 94.0769  |
| 1474 | 60.67894 | 98.85645 | 97.72789 | 94.08149 |
| 1473 | 59.89243 | 98.86156 | 97.72888 | 94.0862  |
| 1472 | 59.08814 | 98.86667 | 97.72986 | 94.09103 |
| 1471 | 58.26845 | 98.87178 | 97.73082 | 94.09597 |
| 1470 | 57.43573 | 98.87688 | 97.73177 | 94.10102 |
| 1469 | 56.5924  | 98.88198 | 97.73269 | 94.10618 |
| 1468 | 55.74106 | 98.88707 | 97.7336  | 94.11143 |
| 1467 | 54.88455 | 98.89216 | 97.73448 | 94.11677 |
| 1466 | 54.02606 | 98.89724 | 97.73534 | 94.1222  |
| 1465 | 53.16902 | 98.90232 | 97.73617 | 94.12771 |
| 1464 | 52.3169  | 98.90738 | 97.73697 | 94.1333  |
| 1463 | 51.47299 | 98.91244 | 97.73773 | 94.13895 |

|      |          |          |          |          |
|------|----------|----------|----------|----------|
| 1462 | 50.64022 | 98.91749 | 97.73846 | 94.14468 |
| 1461 | 49.82102 | 98.92252 | 97.73916 | 94.15046 |
| 1460 | 49.01728 | 98.92754 | 97.73981 | 94.15629 |
| 1459 | 48.23027 | 98.93255 | 97.74043 | 94.16218 |
| 1458 | 47.46055 | 98.93754 | 97.741   | 94.16811 |
| 1457 | 46.70789 | 98.94252 | 97.74152 | 94.17407 |
| 1456 | 45.9714  | 98.94749 | 97.74199 | 94.18007 |
| 1455 | 45.24978 | 98.95243 | 97.74242 | 94.18609 |
| 1454 | 44.5416  | 98.95736 | 97.74279 | 94.19214 |
| 1453 | 43.84565 | 98.96227 | 97.7431  | 94.1982  |
| 1452 | 43.16108 | 98.96716 | 97.74336 | 94.20427 |
| 1451 | 42.48753 | 98.97203 | 97.74355 | 94.21034 |
| 1450 | 41.82513 | 98.97687 | 97.74369 | 94.21641 |
| 1449 | 41.17451 | 98.9817  | 97.74375 | 94.22247 |
| 1448 | 40.53673 | 98.9865  | 97.74375 | 94.22852 |
| 1447 | 39.91331 | 98.99128 | 97.74369 | 94.23454 |
| 1446 | 39.30609 | 98.99603 | 97.74354 | 94.24055 |
| 1445 | 38.71716 | 99.00076 | 97.74333 | 94.24652 |
| 1444 | 38.1488  | 99.00546 | 97.74304 | 94.25246 |
| 1443 | 37.6033  | 99.01013 | 97.74267 | 94.25835 |
| 1442 | 37.08292 | 99.01477 | 97.74221 | 94.26419 |
| 1441 | 36.58982 | 99.01939 | 97.74168 | 94.26998 |
| 1440 | 36.12597 | 99.02397 | 97.74105 | 94.27571 |
| 1439 | 35.69317 | 99.02852 | 97.74034 | 94.28137 |
| 1438 | 35.29301 | 99.03305 | 97.73954 | 94.28697 |
| 1437 | 34.92686 | 99.03754 | 97.73865 | 94.29248 |
| 1436 | 34.5958  | 99.04199 | 97.73766 | 94.29791 |
| 1435 | 34.30073 | 99.04641 | 97.73657 | 94.30325 |
| 1434 | 34.04227 | 99.0508  | 97.73539 | 94.3085  |
| 1433 | 33.82086 | 99.05515 | 97.7341  | 94.31364 |
| 1432 | 33.63681 | 99.05947 | 97.73271 | 94.31868 |
| 1431 | 33.49024 | 99.06374 | 97.73121 | 94.32361 |
| 1430 | 33.38121 | 99.06798 | 97.72961 | 94.32842 |
| 1429 | 33.30973 | 99.07219 | 97.72789 | 94.3331  |
| 1428 | 33.27583 | 99.07635 | 97.72606 | 94.33766 |
| 1427 | 33.27968 | 99.08047 | 97.72412 | 94.34207 |
| 1426 | 33.3216  | 99.08455 | 97.72206 | 94.34635 |
| 1425 | 33.402   | 99.08859 | 97.71988 | 94.35048 |
| 1424 | 33.52135 | 99.09258 | 97.71758 | 94.35446 |
| 1423 | 33.68    | 99.09653 | 97.71515 | 94.35828 |
| 1422 | 33.87805 | 99.10044 | 97.7126  | 94.36194 |

|      |          |          |          |          |
|------|----------|----------|----------|----------|
| 1421 | 34.11526 | 99.10431 | 97.70993 | 94.36543 |
| 1420 | 34.39094 | 99.10812 | 97.70712 | 94.36874 |
| 1419 | 34.70397 | 99.1119  | 97.70418 | 94.37187 |
| 1418 | 35.0528  | 99.11562 | 97.70111 | 94.37482 |
| 1417 | 35.4356  | 99.1193  | 97.6979  | 94.37758 |
| 1416 | 35.85042 | 99.12293 | 97.69456 | 94.38013 |
| 1415 | 36.29531 | 99.12652 | 97.69108 | 94.38249 |
| 1414 | 36.76848 | 99.13005 | 97.68745 | 94.38464 |
| 1413 | 37.26836 | 99.13353 | 97.68368 | 94.38658 |
| 1412 | 37.79362 | 99.13697 | 97.67977 | 94.38829 |
| 1411 | 38.3431  | 99.14035 | 97.67571 | 94.38979 |
| 1410 | 38.91569 | 99.14368 | 97.67151 | 94.39105 |
| 1409 | 39.51026 | 99.14696 | 97.66715 | 94.39209 |
| 1408 | 40.12563 | 99.15018 | 97.66264 | 94.39288 |
| 1407 | 40.76056 | 99.15336 | 97.65797 | 94.39343 |
| 1406 | 41.41374 | 99.15647 | 97.65315 | 94.39373 |
| 1405 | 42.08381 | 99.15954 | 97.64818 | 94.39377 |
| 1404 | 42.76933 | 99.16255 | 97.64304 | 94.39356 |
| 1403 | 43.46877 | 99.1655  | 97.63774 | 94.39309 |
| 1402 | 44.18049 | 99.1684  | 97.63229 | 94.39234 |
| 1401 | 44.90278 | 99.17124 | 97.62666 | 94.39132 |
| 1400 | 45.6338  | 99.17402 | 97.62088 | 94.39003 |
| 1399 | 46.37165 | 99.17675 | 97.61492 | 94.38845 |
| 1398 | 47.11431 | 99.17942 | 97.6088  | 94.38658 |
| 1397 | 47.8597  | 99.18203 | 97.60251 | 94.38442 |
| 1396 | 48.60565 | 99.18458 | 97.59605 | 94.38197 |
| 1395 | 49.35002 | 99.18707 | 97.58941 | 94.37921 |
| 1394 | 50.09074 | 99.18951 | 97.5826  | 94.37615 |
| 1393 | 50.82584 | 99.19188 | 97.57562 | 94.37279 |
| 1392 | 51.55356 | 99.19419 | 97.56846 | 94.3691  |
| 1391 | 52.2723  | 99.19644 | 97.56112 | 94.3651  |
| 1390 | 52.98069 | 99.19863 | 97.55361 | 94.36078 |
| 1389 | 53.67748 | 99.20076 | 97.54591 | 94.35613 |
| 1388 | 54.36161 | 99.20283 | 97.53803 | 94.35115 |
| 1387 | 55.03211 | 99.20483 | 97.52998 | 94.34584 |
| 1386 | 55.68812 | 99.20677 | 97.52173 | 94.34019 |
| 1385 | 56.32885 | 99.20865 | 97.51331 | 94.3342  |
| 1384 | 56.95355 | 99.21047 | 97.5047  | 94.32787 |
| 1383 | 57.56146 | 99.21222 | 97.4959  | 94.32119 |
| 1382 | 58.1518  | 99.2139  | 97.48691 | 94.31415 |
| 1381 | 58.72375 | 99.21553 | 97.47774 | 94.30676 |



|      |          |          |          |          |
|------|----------|----------|----------|----------|
| 1380 | 59.27654 | 99.21709 | 97.46838 | 94.29901 |
| 1379 | 59.80947 | 99.21858 | 97.45883 | 94.2909  |
| 1378 | 60.32204 | 99.22001 | 97.44909 | 94.28243 |
| 1377 | 60.81404 | 99.22137 | 97.43915 | 94.27359 |
| 1376 | 61.28565 | 99.22267 | 97.42903 | 94.26437 |
| 1375 | 61.73741 | 99.2239  | 97.41871 | 94.25478 |
| 1374 | 62.17026 | 99.22507 | 97.40821 | 94.24482 |
| 1373 | 62.5854  | 99.22617 | 97.3975  | 94.23448 |
| 1372 | 62.98416 | 99.22721 | 97.38661 | 94.22375 |
| 1371 | 63.36792 | 99.22818 | 97.37552 | 94.21264 |
| 1370 | 63.73801 | 99.22908 | 97.36423 | 94.20114 |
| 1369 | 64.09564 | 99.22991 | 97.35275 | 94.18925 |
| 1368 | 64.44191 | 99.23068 | 97.34107 | 94.17697 |
| 1367 | 64.7777  | 99.23138 | 97.3292  | 94.1643  |
| 1366 | 65.10367 | 99.23202 | 97.31713 | 94.15123 |
| 1365 | 65.42023 | 99.23259 | 97.30487 | 94.13776 |
| 1364 | 65.72749 | 99.23309 | 97.29241 | 94.1239  |
| 1363 | 66.02535 | 99.23352 | 97.27975 | 94.10963 |
| 1362 | 66.31354 | 99.23389 | 97.2669  | 94.09496 |
| 1361 | 66.59172 | 99.23419 | 97.25385 | 94.07988 |
| 1360 | 66.85956 | 99.23442 | 97.2406  | 94.06439 |
| 1359 | 67.11678 | 99.23458 | 97.22716 | 94.0485  |
| 1358 | 67.36323 | 99.23468 | 97.21352 | 94.0322  |
| 1357 | 67.59887 | 99.23471 | 97.19968 | 94.01549 |
| 1356 | 67.82376 | 99.23467 | 97.18565 | 93.99836 |
| 1355 | 68.03807 | 99.23457 | 97.17142 | 93.98082 |
| 1354 | 68.24205 | 99.2344  | 97.157   | 93.96287 |
| 1353 | 68.43596 | 99.23416 | 97.14238 | 93.94451 |
| 1352 | 68.62008 | 99.23386 | 97.12756 | 93.92573 |
| 1351 | 68.79456 | 99.23348 | 97.11256 | 93.90653 |
| 1350 | 68.9594  | 99.23304 | 97.09735 | 93.88692 |
| 1349 | 69.11438 | 99.23254 | 97.08196 | 93.86689 |
| 1348 | 69.25906 | 99.23196 | 97.06637 | 93.84644 |
| 1347 | 69.39272 | 99.23133 | 97.05059 | 93.82557 |
| 1346 | 69.51442 | 99.23062 | 97.03462 | 93.80429 |
| 1345 | 69.62288 | 99.22985 | 97.01846 | 93.78259 |
| 1344 | 69.71652 | 99.22901 | 97.00211 | 93.76048 |
| 1343 | 69.79331 | 99.22811 | 96.98557 | 93.73795 |
| 1342 | 69.85077 | 99.22714 | 96.96884 | 93.715   |
| 1341 | 69.88596 | 99.2261  | 96.95192 | 93.69163 |
| 1340 | 69.89549 | 99.225   | 96.93482 | 93.66785 |

|      |          |          |          |          |
|------|----------|----------|----------|----------|
| 1339 | 69.87565 | 99.22384 | 96.91753 | 93.64365 |
| 1338 | 69.82252 | 99.22261 | 96.90006 | 93.61904 |
| 1337 | 69.73216 | 99.22131 | 96.8824  | 93.59402 |
| 1336 | 69.60071 | 99.21995 | 96.86456 | 93.56858 |
| 1335 | 69.42457 | 99.21853 | 96.84654 | 93.54274 |
| 1334 | 69.20049 | 99.21704 | 96.82834 | 93.51648 |
| 1333 | 68.92571 | 99.21549 | 96.80997 | 93.48981 |
| 1332 | 68.59813 | 99.21388 | 96.79141 | 93.46274 |
| 1331 | 68.21636 | 99.2122  | 96.77268 | 93.43526 |
| 1330 | 67.77983 | 99.21047 | 96.75378 | 93.40738 |
| 1329 | 67.28886 | 99.20867 | 96.7347  | 93.37909 |
| 1328 | 66.74458 | 99.2068  | 96.71545 | 93.35041 |
| 1327 | 66.14885 | 99.20488 | 96.69604 | 93.32132 |
| 1326 | 65.50415 | 99.20289 | 96.67645 | 93.29184 |
| 1325 | 64.81344 | 99.20085 | 96.6567  | 93.26197 |
| 1324 | 64.08    | 99.19874 | 96.63678 | 93.2317  |
| 1323 | 63.30733 | 99.19658 | 96.6167  | 93.20104 |
| 1322 | 62.49899 | 99.19435 | 96.59646 | 93.17    |
| 1321 | 61.65851 | 99.19206 | 96.57606 | 93.13857 |
| 1320 | 60.78927 | 99.18972 | 96.5555  | 93.10676 |
| 1319 | 59.8944  | 99.18732 | 96.53479 | 93.07457 |
| 1318 | 58.9767  | 99.18486 | 96.51392 | 93.04201 |
| 1317 | 58.03863 | 99.18234 | 96.4929  | 93.00907 |
| 1316 | 57.08231 | 99.17977 | 96.47174 | 92.97576 |
| 1315 | 56.10952 | 99.17714 | 96.45042 | 92.94209 |
| 1314 | 55.12183 | 99.17445 | 96.42896 | 92.90805 |
| 1313 | 54.12063 | 99.17171 | 96.40736 | 92.87366 |
| 1312 | 53.10723 | 99.16892 | 96.38561 | 92.83891 |
| 1311 | 52.08294 | 99.16607 | 96.36373 | 92.8038  |
| 1310 | 51.04909 | 99.16316 | 96.34171 | 92.76835 |
| 1309 | 50.00716 | 99.1602  | 96.31956 | 92.73255 |
| 1308 | 48.95875 | 99.15719 | 96.29727 | 92.69641 |
| 1307 | 47.90569 | 99.15413 | 96.27486 | 92.65994 |
| 1306 | 46.84995 | 99.15102 | 96.25232 | 92.62313 |
| 1305 | 45.79375 | 99.14785 | 96.22966 | 92.58599 |
| 1304 | 44.73946 | 99.14463 | 96.20687 | 92.54853 |
| 1303 | 43.68964 | 99.14137 | 96.18397 | 92.51076 |
| 1302 | 42.64698 | 99.13805 | 96.16095 | 92.47266 |
| 1301 | 41.61436 | 99.13469 | 96.13782 | 92.43426 |
| 1300 | 40.59483 | 99.13128 | 96.11457 | 92.39555 |
| 1299 | 39.59157 | 99.12782 | 96.09122 | 92.35654 |

|      |          |          |          |          |
|------|----------|----------|----------|----------|
| 1298 | 38.60794 | 99.12431 | 96.06777 | 92.31724 |
| 1297 | 37.64741 | 99.12076 | 96.04421 | 92.27765 |
| 1296 | 36.71344 | 99.11716 | 96.02055 | 92.23777 |
| 1295 | 35.80945 | 99.11352 | 95.99679 | 92.19761 |
| 1294 | 34.93868 | 99.10983 | 95.97295 | 92.15718 |
| 1293 | 34.10409 | 99.1061  | 95.94901 | 92.11647 |
| 1292 | 33.30832 | 99.10232 | 95.92498 | 92.07551 |
| 1291 | 32.55362 | 99.09851 | 95.90087 | 92.03429 |
| 1290 | 31.84177 | 99.09465 | 95.87668 | 91.99281 |
| 1289 | 31.17412 | 99.09075 | 95.8524  | 91.95109 |
| 1288 | 30.55145 | 99.08681 | 95.82806 | 91.90913 |
| 1287 | 29.97407 | 99.08283 | 95.80364 | 91.86693 |
| 1286 | 29.44175 | 99.07881 | 95.77915 | 91.82451 |
| 1285 | 28.95379 | 99.07476 | 95.7546  | 91.78186 |
| 1284 | 28.50911 | 99.07067 | 95.72998 | 91.739   |
| 1283 | 28.1063  | 99.06654 | 95.70531 | 91.69593 |
| 1282 | 27.74374 | 99.06237 | 95.68058 | 91.65265 |
| 1281 | 27.41969 | 99.05817 | 95.6558  | 91.60918 |
| 1280 | 27.13239 | 99.05393 | 95.63097 | 91.56552 |
| 1279 | 26.88013 | 99.04966 | 95.60609 | 91.52167 |
| 1278 | 26.66136 | 99.04536 | 95.58117 | 91.47765 |
| 1277 | 26.47472 | 99.04103 | 95.55621 | 91.43346 |
| 1276 | 26.31913 | 99.03666 | 95.53122 | 91.38911 |
| 1275 | 26.19378 | 99.03227 | 95.5062  | 91.34459 |
| 1274 | 26.09814 | 99.02784 | 95.48114 | 91.29993 |
| 1273 | 26.03193 | 99.02338 | 95.45606 | 91.25513 |
| 1272 | 25.99505 | 99.0189  | 95.43097 | 91.21019 |
| 1271 | 25.98753 | 99.01439 | 95.40585 | 91.16513 |
| 1270 | 26.00947 | 99.00985 | 95.38072 | 91.11994 |
| 1269 | 26.06099 | 99.00528 | 95.35558 | 91.07464 |
| 1268 | 26.14218 | 99.00069 | 95.33043 | 91.02924 |
| 1267 | 26.25307 | 98.99608 | 95.30528 | 90.98373 |
| 1266 | 26.39362 | 98.99144 | 95.28014 | 90.93814 |
| 1265 | 26.56366 | 98.98678 | 95.25499 | 90.89246 |
| 1264 | 26.76294 | 98.9821  | 95.22986 | 90.84671 |
| 1263 | 26.99106 | 98.97739 | 95.20473 | 90.80089 |
| 1262 | 27.24748 | 98.97266 | 95.17962 | 90.755   |
| 1261 | 27.53156 | 98.96792 | 95.15453 | 90.70907 |
| 1260 | 27.84256 | 98.96316 | 95.12947 | 90.66309 |
| 1259 | 28.1796  | 98.95837 | 95.10443 | 90.61708 |
| 1258 | 28.54174 | 98.95357 | 95.07942 | 90.57103 |

|      |          |          |          |          |
|------|----------|----------|----------|----------|
| 1257 | 28.9279  | 98.94876 | 95.05445 | 90.52497 |
| 1256 | 29.33687 | 98.94392 | 95.02952 | 90.47889 |
| 1255 | 29.76729 | 98.93908 | 95.00462 | 90.4328  |
| 1254 | 30.21761 | 98.93422 | 94.97978 | 90.38672 |
| 1253 | 30.6861  | 98.92934 | 94.95498 | 90.34066 |
| 1252 | 31.17087 | 98.92445 | 94.93024 | 90.29461 |
| 1251 | 31.66989 | 98.91956 | 94.90556 | 90.24859 |
| 1250 | 32.18101 | 98.91465 | 94.88093 | 90.2026  |
| 1249 | 32.70201 | 98.90973 | 94.85637 | 90.15666 |
| 1248 | 33.23063 | 98.9048  | 94.83189 | 90.11077 |
| 1247 | 33.76461 | 98.89986 | 94.80747 | 90.06495 |
| 1246 | 34.30173 | 98.89491 | 94.78313 | 90.01919 |
| 1245 | 34.83989 | 98.88996 | 94.75888 | 89.97351 |
| 1244 | 35.37716 | 98.885   | 94.7347  | 89.92792 |
| 1243 | 35.91184 | 98.88004 | 94.71062 | 89.88242 |
| 1242 | 36.44255 | 98.87507 | 94.68663 | 89.83702 |
| 1241 | 36.96821 | 98.87009 | 94.66274 | 89.79174 |
| 1240 | 37.48806 | 98.86512 | 94.63894 | 89.74657 |
| 1239 | 38.00165 | 98.86014 | 94.61525 | 89.70154 |
| 1238 | 38.50878 | 98.85516 | 94.59167 | 89.65664 |
| 1237 | 39.0095  | 98.85018 | 94.5682  | 89.61189 |
| 1236 | 39.50401 | 98.8452  | 94.54484 | 89.56729 |
| 1235 | 39.99263 | 98.84022 | 94.52161 | 89.52285 |
| 1234 | 40.47574 | 98.83524 | 94.4985  | 89.47859 |
| 1233 | 40.95367 | 98.83027 | 94.47551 | 89.4345  |
| 1232 | 41.42671 | 98.8253  | 94.45266 | 89.3906  |
| 1231 | 41.895   | 98.82033 | 94.42994 | 89.3469  |
| 1230 | 42.35859 | 98.81537 | 94.40736 | 89.3034  |
| 1229 | 42.81736 | 98.81041 | 94.38492 | 89.26012 |
| 1228 | 43.27113 | 98.80546 | 94.36263 | 89.21706 |
| 1227 | 43.71967 | 98.80051 | 94.34049 | 89.17423 |
| 1226 | 44.16273 | 98.79557 | 94.3185  | 89.13164 |
| 1225 | 44.60011 | 98.79064 | 94.29666 | 89.0893  |
| 1224 | 45.03166 | 98.78572 | 94.27499 | 89.04722 |
| 1223 | 45.45727 | 98.78081 | 94.25349 | 89.0054  |
| 1222 | 45.87693 | 98.77591 | 94.23215 | 88.96385 |
| 1221 | 46.2907  | 98.77103 | 94.21098 | 88.92258 |
| 1220 | 46.69875 | 98.76615 | 94.18999 | 88.88161 |
| 1219 | 47.10131 | 98.76129 | 94.16918 | 88.84093 |
| 1218 | 47.49871 | 98.75643 | 94.14855 | 88.80056 |
| 1217 | 47.89129 | 98.7516  | 94.1281  | 88.7605  |

|      |          |          |          |          |
|------|----------|----------|----------|----------|
| 1216 | 48.27943 | 98.74677 | 94.10785 | 88.72077 |
| 1215 | 48.66348 | 98.74197 | 94.08779 | 88.68137 |
| 1214 | 49.04373 | 98.73718 | 94.06792 | 88.64231 |
| 1213 | 49.42048 | 98.7324  | 94.04826 | 88.60359 |
| 1212 | 49.79396 | 98.72764 | 94.02879 | 88.56524 |
| 1211 | 50.16443 | 98.7229  | 94.00954 | 88.52724 |
| 1210 | 50.53213 | 98.71818 | 93.99049 | 88.48962 |
| 1209 | 50.89732 | 98.71348 | 93.97166 | 88.45238 |
| 1208 | 51.26024 | 98.7088  | 93.95305 | 88.41553 |
| 1207 | 51.62113 | 98.70413 | 93.93465 | 88.37907 |
| 1206 | 51.9802  | 98.69949 | 93.91648 | 88.34302 |
| 1205 | 52.33763 | 98.69487 | 93.89853 | 88.30738 |
| 1204 | 52.69359 | 98.69027 | 93.88081 | 88.27216 |
| 1203 | 53.04823 | 98.68569 | 93.86333 | 88.23737 |
| 1202 | 53.40167 | 98.68114 | 93.84608 | 88.20301 |
| 1201 | 53.75399 | 98.67661 | 93.82907 | 88.16909 |
| 1200 | 54.10523 | 98.67211 | 93.8123  | 88.13563 |
| 1199 | 54.45537 | 98.66762 | 93.79577 | 88.10262 |
| 1198 | 54.8043  | 98.66317 | 93.77949 | 88.07008 |
| 1197 | 55.15185 | 98.65874 | 93.76347 | 88.03801 |
| 1196 | 55.49778 | 98.65433 | 93.74769 | 88.00641 |
| 1195 | 55.84182 | 98.64996 | 93.73217 | 87.97531 |
| 1194 | 56.18365 | 98.6456  | 93.71691 | 87.9447  |
| 1193 | 56.52292 | 98.64128 | 93.70191 | 87.91459 |
| 1192 | 56.85926 | 98.63699 | 93.68718 | 87.88499 |
| 1191 | 57.19228 | 98.63272 | 93.67271 | 87.8559  |
| 1190 | 57.52157 | 98.62848 | 93.65851 | 87.82734 |
| 1189 | 57.84671 | 98.62427 | 93.64458 | 87.7993  |
| 1188 | 58.16734 | 98.62009 | 93.63093 | 87.7718  |
| 1187 | 58.48315 | 98.61594 | 93.61755 | 87.74484 |
| 1186 | 58.79391 | 98.61182 | 93.60445 | 87.71843 |
| 1185 | 59.09945 | 98.60773 | 93.59163 | 87.69257 |
| 1184 | 59.39974 | 98.60367 | 93.5791  | 87.66727 |
| 1183 | 59.69478 | 98.59964 | 93.56685 | 87.64254 |
| 1182 | 59.98469 | 98.59565 | 93.55489 | 87.61838 |
| 1181 | 60.26966 | 98.59168 | 93.54322 | 87.59481 |
| 1180 | 60.54997 | 98.58775 | 93.53184 | 87.57181 |
| 1179 | 60.82606 | 98.58385 | 93.52075 | 87.54941 |
| 1178 | 61.09842 | 98.57998 | 93.50996 | 87.5276  |
| 1177 | 61.3677  | 98.57615 | 93.49947 | 87.5064  |
| 1176 | 61.6346  | 98.57235 | 93.48928 | 87.4858  |

|      |          |          |          |          |
|------|----------|----------|----------|----------|
| 1175 | 61.89989 | 98.56858 | 93.47939 | 87.46582 |
| 1174 | 62.16438 | 98.56485 | 93.4698  | 87.44645 |
| 1173 | 62.42893 | 98.56114 | 93.46052 | 87.42771 |
| 1172 | 62.69441 | 98.55748 | 93.45154 | 87.4096  |
| 1171 | 62.96175 | 98.55384 | 93.44287 | 87.39212 |
| 1170 | 63.23185 | 98.55025 | 93.43451 | 87.37528 |
| 1169 | 63.50561 | 98.54668 | 93.42646 | 87.35908 |
| 1168 | 63.78385 | 98.54315 | 93.41872 | 87.34353 |
| 1167 | 64.06728 | 98.53965 | 93.4113  | 87.32863 |
| 1166 | 64.35645 | 98.53619 | 93.40419 | 87.31439 |
| 1165 | 64.65176 | 98.53276 | 93.3974  | 87.30081 |
| 1164 | 64.95343 | 98.52937 | 93.39092 | 87.28789 |
| 1163 | 65.26154 | 98.52601 | 93.38476 | 87.27564 |
| 1162 | 65.57604 | 98.52269 | 93.37892 | 87.26407 |
| 1161 | 65.89677 | 98.5194  | 93.3734  | 87.25317 |
| 1160 | 66.2235  | 98.51615 | 93.3682  | 87.24295 |
| 1159 | 66.55592 | 98.51293 | 93.36332 | 87.23342 |
| 1158 | 66.89363 | 98.50974 | 93.35877 | 87.22457 |
| 1157 | 67.23623 | 98.50659 | 93.35454 | 87.21641 |
| 1156 | 67.58327 | 98.50347 | 93.35063 | 87.20895 |
| 1155 | 67.93431 | 98.50039 | 93.34704 | 87.20218 |
| 1154 | 68.28896 | 98.49734 | 93.34378 | 87.19611 |
| 1153 | 68.64679 | 98.49433 | 93.34085 | 87.19074 |
| 1152 | 69.00745 | 98.49134 | 93.33823 | 87.18608 |
| 1151 | 69.37055 | 98.4884  | 93.33595 | 87.18213 |
| 1150 | 69.73569 | 98.48548 | 93.33399 | 87.17888 |
| 1149 | 70.10248 | 98.4826  | 93.33236 | 87.17635 |
| 1148 | 70.47049 | 98.47975 | 93.33105 | 87.17452 |
| 1147 | 70.83927 | 98.47694 | 93.33006 | 87.17342 |
| 1146 | 71.20839 | 98.47415 | 93.32941 | 87.17303 |
| 1145 | 71.57733 | 98.4714  | 93.32907 | 87.17336 |
| 1144 | 71.94557 | 98.46868 | 93.32907 | 87.1744  |
| 1143 | 72.31251 | 98.46599 | 93.32939 | 87.17617 |
| 1142 | 72.67751 | 98.46334 | 93.33003 | 87.17867 |
| 1141 | 73.03987 | 98.46071 | 93.33099 | 87.18188 |
| 1140 | 73.39889 | 98.45811 | 93.33228 | 87.18582 |
| 1139 | 73.75387 | 98.45555 | 93.33339 | 87.19049 |
| 1138 | 74.10415 | 98.45301 | 93.33583 | 87.19588 |
| 1137 | 74.44907 | 98.4505  | 93.33809 | 87.20199 |
| 1136 | 74.788   | 98.44802 | 93.34067 | 87.20883 |
| 1135 | 75.12032 | 98.44557 | 93.34356 | 87.2164  |

|      |          |          |          |          |
|------|----------|----------|----------|----------|
| 1134 | 75.4454  | 98.44315 | 93.34678 | 87.22469 |
| 1133 | 75.7626  | 98.44075 | 93.35031 | 87.23371 |
| 1132 | 76.07133 | 98.43838 | 93.35416 | 87.24345 |
| 1131 | 76.37102 | 98.43604 | 93.35833 | 87.25392 |
| 1130 | 76.66113 | 98.43372 | 93.36281 | 87.26512 |
| 1129 | 76.94119 | 98.43142 | 93.3676  | 87.27703 |
| 1128 | 77.21074 | 98.42915 | 93.3727  | 87.28967 |
| 1127 | 77.46934 | 98.42691 | 93.37812 | 87.30303 |
| 1126 | 77.71654 | 98.42468 | 93.38384 | 87.31711 |
| 1125 | 77.95194 | 98.42248 | 93.38987 | 87.33191 |
| 1124 | 78.17516 | 98.4203  | 93.3962  | 87.34743 |
| 1123 | 78.3859  | 98.41814 | 93.40284 | 87.36366 |
| 1122 | 78.58398 | 98.41601 | 93.40978 | 87.3806  |
| 1121 | 78.76935 | 98.41389 | 93.41702 | 87.39825 |
| 1120 | 78.94207 | 98.41179 | 93.42456 | 87.41662 |
| 1119 | 79.1023  | 98.4097  | 93.43239 | 87.43568 |
| 1118 | 79.25029 | 98.40764 | 93.44051 | 87.45546 |
| 1117 | 79.38637 | 98.40559 | 93.44893 | 87.47593 |
| 1116 | 79.51092 | 98.40355 | 93.45764 | 87.4971  |
| 1115 | 79.62443 | 98.40153 | 93.46663 | 87.51897 |
| 1114 | 79.72741 | 98.39953 | 93.47591 | 87.54153 |
| 1113 | 79.82049 | 98.39753 | 93.48547 | 87.56478 |
| 1112 | 79.9043  | 98.39555 | 93.4953  | 87.58871 |
| 1111 | 79.97951 | 98.39358 | 93.50542 | 87.61333 |
| 1110 | 80.04677 | 98.39162 | 93.5158  | 87.63862 |
| 1109 | 80.10671 | 98.38966 | 93.52646 | 87.66459 |
| 1108 | 80.15993 | 98.38772 | 93.53739 | 87.69122 |
| 1107 | 80.20702 | 98.38578 | 93.54858 | 87.71852 |
| 1106 | 80.24855 | 98.38384 | 93.56004 | 87.74648 |
| 1105 | 80.28508 | 98.38192 | 93.57175 | 87.7751  |
| 1104 | 80.31718 | 98.37999 | 93.58372 | 87.80437 |
| 1103 | 80.34539 | 98.37807 | 93.59594 | 87.83429 |
| 1102 | 80.37027 | 98.37615 | 93.60842 | 87.86484 |
| 1101 | 80.39236 | 98.37423 | 93.62113 | 87.89604 |
| 1100 | 80.41221 | 98.3723  | 93.6341  | 87.92786 |
| 1099 | 80.43038 | 98.37038 | 93.6473  | 87.96031 |
| 1098 | 80.44748 | 98.36845 | 93.66073 | 87.99338 |
| 1097 | 80.46407 | 98.36652 | 93.6744  | 88.02706 |
| 1096 | 80.48073 | 98.36458 | 93.6883  | 88.06136 |
| 1095 | 80.49796 | 98.36263 | 93.70242 | 88.09625 |
| 1094 | 80.51622 | 98.36068 | 93.71676 | 88.13174 |

|      |          |          |          |          |
|------|----------|----------|----------|----------|
| 1093 | 80.53588 | 98.35871 | 93.73132 | 88.16781 |
| 1092 | 80.55727 | 98.35674 | 93.7461  | 88.20448 |
| 1091 | 80.58067 | 98.35475 | 93.76108 | 88.24171 |
| 1090 | 80.60631 | 98.35275 | 93.77627 | 88.27952 |
| 1089 | 80.63441 | 98.35073 | 93.79166 | 88.31788 |
| 1088 | 80.66513 | 98.34869 | 93.80724 | 88.35681 |
| 1087 | 80.69861 | 98.34664 | 93.82302 | 88.39628 |
| 1086 | 80.73491 | 98.34457 | 93.83899 | 88.43629 |
| 1085 | 80.77409 | 98.34247 | 93.85514 | 88.47683 |
| 1084 | 80.81621 | 98.34036 | 93.87147 | 88.51789 |
| 1083 | 80.86133 | 98.33822 | 93.88797 | 88.55948 |
| 1082 | 80.90961 | 98.33605 | 93.90464 | 88.60157 |
| 1081 | 80.96122 | 98.33386 | 93.92149 | 88.64417 |
| 1080 | 81.01641 | 98.33164 | 93.93849 | 88.68725 |
| 1079 | 81.07542 | 98.32939 | 93.95564 | 88.73082 |
| 1078 | 81.13851 | 98.3271  | 93.97295 | 88.77487 |
| 1077 | 81.20589 | 98.32479 | 93.99041 | 88.81938 |
| 1076 | 81.27774 | 98.32243 | 94.00801 | 88.86436 |
| 1075 | 81.3542  | 98.32005 | 94.02574 | 88.90978 |
| 1074 | 81.43535 | 98.31762 | 94.04361 | 88.95564 |
| 1073 | 81.52121 | 98.31515 | 94.0616  | 89.00193 |
| 1072 | 81.6117  | 98.31264 | 94.07971 | 89.04865 |
| 1071 | 81.70657 | 98.31009 | 94.09794 | 89.09577 |
| 1070 | 81.80545 | 98.30749 | 94.11629 | 89.14331 |
| 1069 | 81.9078  | 98.30484 | 94.13473 | 89.19123 |
| 1068 | 82.01294 | 98.30215 | 94.15328 | 89.23954 |
| 1067 | 82.1201  | 98.2994  | 94.17193 | 89.28822 |
| 1066 | 82.22845 | 98.2966  | 94.19066 | 89.33726 |
| 1065 | 82.33716 | 98.29375 | 94.20948 | 89.38666 |
| 1064 | 82.44546 | 98.29084 | 94.22837 | 89.4364  |
| 1063 | 82.5526  | 98.28788 | 94.24734 | 89.48648 |
| 1062 | 82.65796 | 98.28485 | 94.26638 | 89.53688 |
| 1061 | 82.761   | 98.28176 | 94.28548 | 89.58758 |
| 1060 | 82.86133 | 98.27861 | 94.30463 | 89.6386  |
| 1059 | 82.9587  | 98.27539 | 94.32384 | 89.6899  |
| 1058 | 83.05302 | 98.2721  | 94.34309 | 89.74148 |
| 1057 | 83.14429 | 98.26875 | 94.36238 | 89.79333 |
| 1056 | 83.23264 | 98.26532 | 94.3817  | 89.84544 |
| 1055 | 83.31822 | 98.26182 | 94.40106 | 89.89779 |
| 1054 | 83.40116 | 98.25824 | 94.42043 | 89.95038 |
| 1053 | 83.48155 | 98.25458 | 94.43981 | 90.0032  |



|      |          |          |          |          |
|------|----------|----------|----------|----------|
| 1052 | 83.55942 | 98.25085 | 94.45921 | 90.05623 |
| 1051 | 83.63469 | 98.24703 | 94.47861 | 90.10946 |
| 1050 | 83.70723 | 98.24313 | 94.49801 | 90.16288 |
| 1049 | 83.77683 | 98.23914 | 94.51739 | 90.21647 |
| 1048 | 83.84326 | 98.23507 | 94.53676 | 90.27024 |
| 1047 | 83.90622 | 98.2309  | 94.55612 | 90.32415 |
| 1046 | 83.96544 | 98.22664 | 94.57544 | 90.37821 |
| 1045 | 84.02068 | 98.22229 | 94.59473 | 90.4324  |
| 1044 | 84.07175 | 98.21784 | 94.61398 | 90.48671 |
| 1043 | 84.11857 | 98.21329 | 94.63318 | 90.54113 |
| 1042 | 84.16116 | 98.20864 | 94.65233 | 90.59564 |
| 1041 | 84.19965 | 98.20389 | 94.67143 | 90.65023 |
| 1040 | 84.23424 | 98.19903 | 94.69045 | 90.7049  |
| 1039 | 84.26516 | 98.19406 | 94.70941 | 90.75962 |
| 1038 | 84.29266 | 98.18898 | 94.72829 | 90.81438 |
| 1037 | 84.31697 | 98.18379 | 94.74708 | 90.86918 |
| 1036 | 84.3383  | 98.17849 | 94.76578 | 90.924   |
| 1035 | 84.35688 | 98.17306 | 94.78438 | 90.97882 |
| 1034 | 84.37292 | 98.16752 | 94.80288 | 91.03364 |
| 1033 | 84.3867  | 98.16186 | 94.82127 | 91.08844 |
| 1032 | 84.39849 | 98.15607 | 94.83955 | 91.14322 |
| 1031 | 84.40863 | 98.15016 | 94.85769 | 91.19794 |
| 1030 | 84.41752 | 98.14411 | 94.87571 | 91.25262 |
| 1029 | 84.42564 | 98.13794 | 94.8936  | 91.30722 |
| 1028 | 84.43356 | 98.13163 | 94.91133 | 91.36174 |
| 1027 | 84.442   | 98.12519 | 94.92892 | 91.41617 |
| 1026 | 84.45184 | 98.1186  | 94.94636 | 91.47049 |
| 1025 | 84.46411 | 98.11188 | 94.96363 | 91.52469 |
| 1024 | 84.47995 | 98.10501 | 94.98072 | 91.57875 |
| 1023 | 84.50061 | 98.098   | 94.99765 | 91.63267 |
| 1022 | 84.52734 | 98.09084 | 95.01439 | 91.68643 |
| 1021 | 84.56138 | 98.08353 | 95.03094 | 91.74001 |
| 1020 | 84.60389 | 98.07607 | 95.04729 | 91.79341 |
| 1019 | 84.65586 | 98.06845 | 95.06345 | 91.84661 |
| 1018 | 84.71811 | 98.06067 | 95.07939 | 91.8996  |
| 1017 | 84.79124 | 98.05273 | 95.09511 | 91.95237 |
| 1016 | 84.87557 | 98.04463 | 95.11062 | 92.00489 |
| 1015 | 84.97115 | 98.03636 | 95.12589 | 92.05717 |
| 1014 | 85.07774 | 98.02793 | 95.14093 | 92.10918 |
| 1013 | 85.19493 | 98.01932 | 95.15572 | 92.16091 |
| 1012 | 85.32211 | 98.01054 | 95.17027 | 92.21236 |

|      |          |          |          |          |
|------|----------|----------|----------|----------|
| 1011 | 85.45865 | 98.00158 | 95.18456 | 92.2635  |
| 1010 | 85.60395 | 97.99245 | 95.19858 | 92.31432 |
| 1009 | 85.75752 | 97.98313 | 95.21234 | 92.36481 |
| 1008 | 85.91904 | 97.97364 | 95.22582 | 92.41496 |
| 1007 | 86.0884  | 97.96395 | 95.23902 | 92.46476 |
| 1006 | 86.26571 | 97.95408 | 95.25193 | 92.51419 |
| 1005 | 86.45126 | 97.94401 | 95.26454 | 92.56323 |
| 1004 | 86.64548 | 97.93375 | 95.27686 | 92.61188 |
| 1003 | 86.84893 | 97.9233  | 95.28886 | 92.66012 |
| 1002 | 87.06216 | 97.91264 | 95.30055 | 92.70795 |
| 1001 | 87.28569 | 97.90179 | 95.31191 | 92.75534 |
| 1000 | 87.51991 | 97.89072 | 95.32295 | 92.80228 |
| 999  | 87.76502 | 97.87946 | 95.33366 | 92.84876 |
| 998  | 88.02104 | 97.86798 | 95.34402 | 92.89478 |
| 997  | 88.28775 | 97.85629 | 95.35403 | 92.9403  |
| 996  | 88.5648  | 97.84438 | 95.36369 | 92.98533 |
| 995  | 88.85169 | 97.83226 | 95.37299 | 93.02986 |
| 994  | 89.14786 | 97.81991 | 95.38193 | 93.07386 |
| 993  | 89.45268 | 97.80735 | 95.39049 | 93.11732 |
| 992  | 89.76552 | 97.79455 | 95.39867 | 93.16024 |
| 991  | 90.0857  | 97.78153 | 95.40646 | 93.2026  |
| 990  | 90.41251 | 97.76828 | 95.41387 | 93.24438 |
| 989  | 90.7452  | 97.75479 | 95.42087 | 93.28558 |
| 988  | 91.08299 | 97.74107 | 95.42747 | 93.32619 |
| 987  | 91.42501 | 97.72711 | 95.43366 | 93.36619 |
| 986  | 91.77036 | 97.7129  | 95.43943 | 93.40556 |
| 985  | 92.11805 | 97.69846 | 95.44478 | 93.44431 |
| 984  | 92.467   | 97.68376 | 95.44971 | 93.48241 |
| 983  | 92.816   | 97.66881 | 95.45419 | 93.51985 |
| 982  | 93.16376 | 97.65361 | 95.45824 | 93.55663 |
| 981  | 93.50885 | 97.63816 | 95.46184 | 93.59272 |
| 980  | 93.84985 | 97.62245 | 95.46498 | 93.62813 |
| 979  | 94.1853  | 97.60648 | 95.46767 | 93.66283 |
| 978  | 94.51387 | 97.59024 | 95.4699  | 93.69682 |
| 977  | 94.83433 | 97.57374 | 95.47165 | 93.73008 |
| 976  | 95.14567 | 97.55697 | 95.47293 | 93.7626  |
| 975  | 95.44708 | 97.53992 | 95.47372 | 93.79438 |
| 974  | 95.73798 | 97.52261 | 95.47403 | 93.8254  |
| 973  | 96.01803 | 97.50501 | 95.47384 | 93.85565 |
| 972  | 96.28713 | 97.48714 | 95.47316 | 93.88511 |
| 971  | 96.54538 | 97.46898 | 95.47197 | 93.91379 |

|     |          |          |          |          |
|-----|----------|----------|----------|----------|
| 970 | 96.79306 | 97.45054 | 95.47027 | 93.94166 |
| 969 | 97.0306  | 97.43181 | 95.46806 | 93.96872 |
| 968 | 97.25847 | 97.41279 | 95.46533 | 93.99496 |
| 967 | 97.47715 | 97.39348 | 95.46207 | 94.02036 |
| 966 | 97.68706 | 97.37387 | 95.45828 | 94.04492 |
| 965 | 97.88852 | 97.35396 | 95.45395 | 94.06863 |
| 964 | 98.08168 | 97.33375 | 95.44908 | 94.09147 |
| 963 | 98.26662 | 97.31324 | 95.44366 | 94.11344 |
| 962 | 98.44322 | 97.29242 | 95.4377  | 94.13452 |
| 961 | 98.61133 | 97.27129 | 95.43117 | 94.15471 |
| 960 | 98.77066 | 97.24985 | 95.42409 | 94.174   |
| 959 | 98.92092 | 97.2281  | 95.41644 | 94.19238 |
| 958 | 99.06182 | 97.20603 | 95.40821 | 94.20983 |
| 957 | 99.19312 | 97.18364 | 95.39941 | 94.22636 |
| 956 | 99.31466 | 97.16092 | 95.39003 | 94.24195 |
| 955 | 99.42639 | 97.13788 | 95.38006 | 94.25658 |
| 954 | 99.52835 | 97.11451 | 95.3695  | 94.27027 |
| 953 | 99.63192 | 97.09082 | 95.35835 | 94.28298 |
| 952 | 99.71409 | 97.06679 | 95.3466  | 94.29472 |
| 951 | 99.78567 | 97.04242 | 95.33424 | 94.30548 |
| 950 | 99.84679 | 97.01772 | 95.32127 | 94.31525 |
| 949 | 99.89756 | 96.99267 | 95.3077  | 94.32403 |
| 948 | 99.93806 | 96.96728 | 95.2935  | 94.33179 |
| 947 | 99.96838 | 96.94155 | 95.27868 | 94.33854 |
| 946 | 99.98865 | 96.91546 | 95.26324 | 94.34427 |
| 945 | 99.99908 | 96.88903 | 95.24717 | 94.34897 |
| 944 | 100      | 96.86224 | 95.23047 | 94.35264 |
| 943 | 99.99183 | 96.83509 | 95.21313 | 94.35526 |
| 942 | 99.97514 | 96.80759 | 95.19514 | 94.35683 |
| 941 | 99.95068 | 96.77973 | 95.17652 | 94.35734 |
| 940 | 99.91935 | 96.7515  | 95.15724 | 94.35679 |
| 939 | 99.88227 | 96.7229  | 95.13731 | 94.35517 |
| 938 | 99.84071 | 96.69394 | 95.11673 | 94.35247 |
| 937 | 99.79607 | 96.6646  | 95.09548 | 94.34869 |
| 936 | 99.7498  | 96.63489 | 95.07357 | 94.34382 |
| 935 | 99.70334 | 96.6048  | 95.051   | 94.33786 |
| 934 | 99.65797 | 96.57434 | 95.02776 | 94.33079 |
| 933 | 99.61479 | 96.54349 | 95.00384 | 94.32262 |
| 932 | 99.57467 | 96.51226 | 94.97925 | 94.31334 |
| 931 | 99.53822 | 96.48064 | 94.95398 | 94.30294 |
| 930 | 99.50582 | 96.44864 | 94.92802 | 94.29141 |

|     |          |          |          |          |
|-----|----------|----------|----------|----------|
| 929 | 99.47765 | 96.41624 | 94.90139 | 94.27876 |
| 928 | 99.45373 | 96.38345 | 94.87406 | 94.26498 |
| 927 | 99.43391 | 96.35027 | 94.84604 | 94.25007 |
| 926 | 99.41801 | 96.31668 | 94.81733 | 94.23401 |
| 925 | 99.40577 | 96.2827  | 94.78792 | 94.2168  |
| 924 | 99.39695 | 96.24831 | 94.75782 | 94.19845 |
| 923 | 99.39134 | 96.21352 | 94.72701 | 94.17894 |
| 922 | 99.38877 | 96.17832 | 94.6955  | 94.15828 |
| 921 | 99.38911 | 96.14271 | 94.66328 | 94.13646 |
| 920 | 99.39227 | 96.10668 | 94.63036 | 94.11347 |
| 919 | 99.39815 | 96.07025 | 94.59672 | 94.08931 |
| 918 | 99.40662 | 96.03339 | 94.56237 | 94.06399 |
| 917 | 99.41752 | 95.99612 | 94.52731 | 94.03749 |
| 916 | 99.43067 | 95.95842 | 94.49153 | 94.00981 |
| 915 | 99.44583 | 95.92031 | 94.45503 | 93.98096 |
| 914 | 99.46273 | 95.88176 | 94.41781 | 93.95092 |
| 913 | 99.48109 | 95.84279 | 94.37987 | 93.9197  |
| 912 | 99.5006  | 95.80339 | 94.34121 | 93.8873  |
| 911 | 99.52094 | 95.76356 | 94.30181 | 93.85371 |
| 910 | 99.54179 | 95.72329 | 94.2617  | 93.81893 |
| 909 | 99.56288 | 95.68259 | 94.22085 | 93.78296 |
| 908 | 99.58399 | 95.64144 | 94.17928 | 93.7458  |
| 907 | 99.60499 | 95.59986 | 94.13697 | 93.70744 |
| 906 | 99.62583 | 95.55783 | 94.09393 | 93.66789 |
| 905 | 99.64657 | 95.51536 | 94.05016 | 93.62714 |
| 904 | 99.66727 | 95.47244 | 94.00565 | 93.5852  |
| 903 | 99.688   | 95.42908 | 93.96041 | 93.54206 |
| 902 | 99.70876 | 95.38526 | 93.91443 | 93.49773 |
| 901 | 99.72945 | 95.34099 | 93.86771 | 93.45219 |
| 900 | 99.74984 | 95.29626 | 93.82026 | 93.40546 |
| 899 | 99.76955 | 95.25108 | 93.77207 | 93.35754 |
| 898 | 99.78803 | 95.20544 | 93.72313 | 93.30841 |
| 897 | 99.80454 | 95.15934 | 93.67346 | 93.25809 |
| 896 | 99.81818 | 95.11277 | 93.62305 | 93.20657 |
| 895 | 99.82783 | 95.06575 | 93.5719  | 93.15386 |
| 894 | 99.83223 | 95.01825 | 93.52001 | 93.09996 |
| 893 | 99.82998 | 94.97029 | 93.46737 | 93.04486 |
| 892 | 99.81962 | 94.92186 | 93.414   | 92.98857 |
| 891 | 99.79971 | 94.87295 | 93.35988 | 92.93109 |
| 890 | 99.76888 | 94.82357 | 93.30503 | 92.87242 |
| 889 | 99.72591 | 94.77372 | 93.24943 | 92.81256 |

|     |          |          |          |          |
|-----|----------|----------|----------|----------|
| 888 | 99.66976 | 94.72339 | 93.19309 | 92.75152 |
| 887 | 99.60056 | 94.67258 | 93.13601 | 92.68929 |
| 886 | 99.51549 | 94.62129 | 93.07819 | 92.62589 |
| 885 | 99.41474 | 94.56952 | 93.01963 | 92.56131 |
| 884 | 99.29813 | 94.51726 | 92.96033 | 92.49555 |
| 883 | 99.1657  | 94.46452 | 92.90029 | 92.42861 |
| 882 | 99.01763 | 94.41129 | 92.83952 | 92.36051 |
| 881 | 98.85424 | 94.35758 | 92.778   | 92.29124 |
| 880 | 98.67591 | 94.30337 | 92.71575 | 92.2208  |
| 879 | 98.48304 | 94.24867 | 92.65277 | 92.14921 |
| 878 | 98.27607 | 94.19348 | 92.58904 | 92.07645 |
| 877 | 98.05544 | 94.13779 | 92.52459 | 92.00255 |
| 876 | 97.82163 | 94.08161 | 92.4594  | 91.92749 |
| 875 | 97.57522 | 94.02493 | 92.39348 | 91.85129 |
| 874 | 97.31685 | 93.96775 | 92.32683 | 91.77394 |
| 873 | 97.04728 | 93.91007 | 92.25945 | 91.69546 |
| 872 | 96.76735 | 93.85189 | 92.19134 | 91.61584 |
| 871 | 96.47798 | 93.7932  | 92.1225  | 91.53509 |
| 870 | 96.18012 | 93.73401 | 92.05294 | 91.45322 |
| 869 | 95.87476 | 93.67432 | 91.98265 | 91.37023 |
| 868 | 95.56291 | 93.61412 | 91.91165 | 91.28612 |
| 867 | 95.24558 | 93.5534  | 91.83992 | 91.20091 |
| 866 | 94.9238  | 93.49218 | 91.76747 | 91.11459 |
| 865 | 94.59862 | 93.43045 | 91.69431 | 91.02717 |
| 864 | 94.27106 | 93.3682  | 91.62043 | 90.93865 |
| 863 | 93.94214 | 93.30545 | 91.54584 | 90.84905 |
| 862 | 93.61287 | 93.24217 | 91.47054 | 90.75836 |
| 861 | 93.28424 | 93.17838 | 91.39453 | 90.6666  |
| 860 | 92.95729 | 93.11408 | 91.31781 | 90.57376 |
| 859 | 92.63309 | 93.04926 | 91.24039 | 90.47986 |
| 858 | 92.31276 | 92.98391 | 91.16226 | 90.3849  |
| 857 | 91.99751 | 92.91805 | 91.08344 | 90.28889 |
| 856 | 91.68861 | 92.85167 | 91.00391 | 90.19183 |
| 855 | 91.38741 | 92.78476 | 90.92369 | 90.09373 |
| 854 | 91.09529 | 92.71733 | 90.84278 | 89.99459 |
| 853 | 90.81374 | 92.64938 | 90.76118 | 89.89443 |
| 852 | 90.54426 | 92.5809  | 90.67889 | 89.79325 |
| 851 | 90.28841 | 92.5119  | 90.59592 | 89.69106 |
| 850 | 90.04777 | 92.44237 | 90.51226 | 89.58786 |
| 849 | 89.82393 | 92.37231 | 90.42792 | 89.48366 |
| 848 | 89.61842 | 92.30173 | 90.34291 | 89.37847 |

|     |          |          |          |          |
|-----|----------|----------|----------|----------|
| 847 | 89.43268 | 92.23061 | 90.25723 | 89.27229 |
| 846 | 89.26801 | 92.15897 | 90.17087 | 89.16514 |
| 845 | 89.12551 | 92.0868  | 90.08384 | 89.05702 |
| 844 | 89.0061  | 92.01409 | 89.99615 | 88.94794 |
| 843 | 88.91047 | 91.94085 | 89.9078  | 88.8379  |
| 842 | 88.83905 | 91.86708 | 89.81879 | 88.72692 |
| 841 | 88.79204 | 91.79278 | 89.72913 | 88.61499 |
| 840 | 88.76942 | 91.71794 | 89.63881 | 88.50214 |
| 839 | 88.77095 | 91.64257 | 89.54784 | 88.38836 |
| 838 | 88.79623 | 91.56666 | 89.45623 | 88.27367 |
| 837 | 88.84474 | 91.49022 | 89.36398 | 88.15808 |
| 836 | 88.91592 | 91.41324 | 89.27108 | 88.04158 |
| 835 | 89.00917 | 91.33573 | 89.17756 | 87.9242  |
| 834 | 89.12389 | 91.25768 | 89.0834  | 87.80593 |
| 833 | 89.25949 | 91.17909 | 88.98861 | 87.68679 |
| 832 | 89.41535 | 91.09997 | 88.8932  | 87.56679 |
| 831 | 89.59082 | 91.0203  | 88.79717 | 87.44593 |
| 830 | 89.78516 | 90.9401  | 88.70052 | 87.32423 |
| 829 | 89.99753 | 90.85936 | 88.60326 | 87.20169 |
| 828 | 90.22703 | 90.77808 | 88.50538 | 87.07831 |
| 827 | 90.47267 | 90.69626 | 88.40691 | 86.95412 |
| 826 | 90.73338 | 90.6139  | 88.30783 | 86.82911 |
| 825 | 91.00807 | 90.531   | 88.20815 | 86.70331 |
| 824 | 91.29559 | 90.44756 | 88.10788 | 86.57671 |
| 823 | 91.59476 | 90.36358 | 88.00702 | 86.44932 |
| 822 | 91.90439 | 90.27906 | 87.90557 | 86.32116 |
| 821 | 92.2233  | 90.19401 | 87.80354 | 86.19223 |
| 820 | 92.55028 | 90.10841 | 87.70093 | 86.06254 |
| 819 | 92.88419 | 90.02227 | 87.59775 | 85.93211 |
| 818 | 93.22384 | 89.93559 | 87.494   | 85.80094 |
| 817 | 93.56811 | 89.84837 | 87.38969 | 85.66903 |
| 816 | 93.91579 | 89.7606  | 87.28481 | 85.53641 |
| 815 | 94.26567 | 89.6723  | 87.17938 | 85.40308 |
| 814 | 94.61649 | 89.58346 | 87.07339 | 85.26904 |
| 813 | 94.96689 | 89.49408 | 86.96685 | 85.13431 |
| 812 | 95.3155  | 89.40416 | 86.85977 | 84.9989  |
| 811 | 95.66087 | 89.3137  | 86.75215 | 84.86282 |
| 810 | 96.00151 | 89.22269 | 86.644   | 84.72607 |
| 809 | 96.3359  | 89.13115 | 86.53531 | 84.58867 |
| 808 | 96.66247 | 89.03907 | 86.42609 | 84.45062 |
| 807 | 96.97962 | 88.94645 | 86.31636 | 84.31194 |

|     |          |          |          |          |
|-----|----------|----------|----------|----------|
| 806 | 97.28571 | 88.8533  | 86.2061  | 84.17263 |
| 805 | 97.57909 | 88.7596  | 86.09533 | 84.03271 |
| 804 | 97.85815 | 88.66537 | 85.98405 | 83.89218 |
| 803 | 98.12131 | 88.57059 | 85.87227 | 83.75105 |
| 802 | 98.36708 | 88.47529 | 85.75999 | 83.60933 |
| 801 | 98.59409 | 88.37944 | 85.64721 | 83.46704 |
| 800 | 98.80112 | 88.28306 | 85.53394 | 83.32417 |
| 799 | 98.9871  | 88.18614 | 85.42018 | 83.18075 |
| 798 | 99.15113 | 88.08869 | 85.30594 | 83.03677 |
| 797 | 99.2925  | 87.9907  | 85.19123 | 82.89226 |
| 796 | 99.41069 | 87.89218 | 85.07604 | 82.74721 |
| 795 | 99.50533 | 87.79312 | 84.96038 | 82.60165 |
| 794 | 99.57619 | 87.69353 | 84.84426 | 82.45557 |
| 793 | 99.62313 | 87.59341 | 84.72768 | 82.30898 |
| 792 | 99.62976 | 87.49276 | 84.61064 | 82.16191 |
| 791 | 99.6123  | 87.39158 | 84.49316 | 82.01435 |
| 790 | 99.57066 | 87.28986 | 84.37523 | 81.86632 |
| 789 | 99.50476 | 87.18762 | 84.25685 | 81.71782 |
| 788 | 99.41452 | 87.08485 | 84.13805 | 81.56886 |
| 787 | 99.29987 | 86.98155 | 84.01881 | 81.41946 |
| 786 | 99.16079 | 86.87772 | 83.89914 | 81.26962 |
| 785 | 98.9973  | 86.77337 | 83.77905 | 81.11935 |
| 784 | 98.80946 | 86.66849 | 83.65854 | 80.96867 |
| 783 | 98.59737 | 86.56308 | 83.53762 | 80.81757 |
| 782 | 98.3612  | 86.45716 | 83.41629 | 80.66607 |
| 781 | 98.1012  | 86.35071 | 83.29456 | 80.51418 |
| 780 | 97.8177  | 86.24373 | 83.17243 | 80.36191 |
| 779 | 97.51113 | 86.13624 | 83.0499  | 80.20927 |
| 778 | 97.18205 | 86.02823 | 82.92699 | 80.05625 |
| 777 | 96.83115 | 85.9197  | 82.80369 | 79.90289 |
| 776 | 96.45921 | 85.81065 | 82.68    | 79.74917 |
| 775 | 96.06712 | 85.70108 | 82.55594 | 79.59512 |
| 774 | 95.65586 | 85.591   | 82.43151 | 79.44074 |
| 773 | 95.22652 | 85.48041 | 82.30672 | 79.28603 |
| 772 | 94.7803  | 85.3693  | 82.18155 | 79.13101 |
| 771 | 94.31849 | 85.25768 | 82.05604 | 78.97569 |
| 770 | 93.84251 | 85.14555 | 81.93016 | 78.82008 |
| 769 | 93.35382 | 85.03291 | 81.80394 | 78.66417 |
| 768 | 92.85397 | 84.91977 | 81.67738 | 78.50799 |
| 767 | 92.34453 | 84.80611 | 81.55047 | 78.35154 |
| 766 | 91.82704 | 84.69195 | 81.42323 | 78.19482 |

|     |          |          |          |          |
|-----|----------|----------|----------|----------|
| 765 | 91.30303 | 84.57729 | 81.29566 | 78.03785 |
| 764 | 90.77396 | 84.46212 | 81.16776 | 77.88063 |
| 763 | 90.24128 | 84.34645 | 81.03954 | 77.72318 |
| 762 | 89.70634 | 84.23028 | 80.911   | 77.5655  |
| 761 | 89.17049 | 84.11362 | 80.78215 | 77.40759 |
| 760 | 88.63501 | 83.99645 | 80.65298 | 77.24947 |
| 759 | 88.10112 | 83.87879 | 80.52352 | 77.09114 |
| 758 | 87.57002 | 83.76064 | 80.39375 | 76.93261 |
| 757 | 87.04286 | 83.642   | 80.26369 | 76.77389 |
| 756 | 86.52073 | 83.52286 | 80.13333 | 76.61499 |
| 755 | 86.0047  | 83.40323 | 80.00269 | 76.45591 |
| 754 | 85.49578 | 83.28312 | 79.87176 | 76.29666 |
| 753 | 84.9949  | 83.16252 | 79.74056 | 76.13725 |
| 752 | 84.50294 | 83.04143 | 79.60908 | 75.97768 |
| 751 | 84.02074 | 82.91986 | 79.47733 | 75.81797 |
| 750 | 83.54906 | 82.79781 | 79.34531 | 75.65812 |
| 749 | 83.08864 | 82.67529 | 79.21303 | 75.49813 |
| 748 | 82.64023 | 82.55228 | 79.08049 | 75.33801 |
| 747 | 82.20454 | 82.4288  | 78.9477  | 75.17777 |
| 746 | 81.78231 | 82.30484 | 78.81465 | 75.01742 |
| 745 | 81.37426 | 82.18041 | 78.68136 | 74.85697 |
| 744 | 80.98108 | 82.05551 | 78.54783 | 74.69641 |
| 743 | 80.60341 | 81.93014 | 78.41406 | 74.53576 |
| 742 | 80.24188 | 81.8043  | 78.28005 | 74.37501 |
| 741 | 79.89705 | 81.678   | 78.14581 | 74.21419 |
| 740 | 79.5695  | 81.55124 | 78.01135 | 74.05329 |
| 739 | 79.25974 | 81.42401 | 77.87666 | 73.89232 |
| 738 | 78.96829 | 81.29633 | 77.74176 | 73.73129 |
| 737 | 78.6956  | 81.16819 | 77.60663 | 73.5702  |
| 736 | 78.44204 | 81.03959 | 77.4713  | 73.40906 |
| 735 | 78.20783 | 80.91054 | 77.33576 | 73.24787 |
| 734 | 77.99306 | 80.78103 | 77.20001 | 73.08664 |
| 733 | 77.79757 | 80.65108 | 77.06406 | 72.92537 |
| 732 | 77.62101 | 80.52068 | 76.92791 | 72.76407 |
| 731 | 77.46278 | 80.38984 | 76.79157 | 72.60275 |
| 730 | 77.32207 | 80.25855 | 76.65504 | 72.44141 |
| 729 | 77.19785 | 80.12682 | 76.51832 | 72.28005 |
| 728 | 77.08889 | 79.99466 | 76.38142 | 72.11868 |
| 727 | 76.99379 | 79.86205 | 76.24434 | 71.95731 |
| 726 | 76.91102 | 79.72901 | 76.10708 | 71.79594 |
| 725 | 76.83894 | 79.59554 | 75.96964 | 71.63457 |



|     |          |          |          |          |
|-----|----------|----------|----------|----------|
| 724 | 76.77587 | 79.46164 | 75.83204 | 71.4732  |
| 723 | 76.72009 | 79.32731 | 75.69427 | 71.31186 |
| 722 | 76.66992 | 79.19256 | 75.55633 | 71.15053 |
| 721 | 76.62372 | 79.05738 | 75.41824 | 70.98922 |
| 720 | 76.57994 | 78.92178 | 75.27998 | 70.82793 |
| 719 | 76.5371  | 78.78576 | 75.14157 | 70.66668 |
| 718 | 76.49379 | 78.64933 | 75.00301 | 70.50546 |
| 717 | 76.44867 | 78.51248 | 74.8643  | 70.34428 |
| 716 | 76.40049 | 78.37522 | 74.72545 | 70.18314 |
| 715 | 76.34799 | 78.23755 | 74.58645 | 70.02204 |
| 714 | 76.28993 | 78.09947 | 74.44731 | 69.861   |
| 713 | 76.22506 | 77.96099 | 74.30803 | 69.7     |
| 712 | 76.15213 | 77.8221  | 74.16862 | 69.53906 |
| 711 | 76.06992 | 77.68282 | 74.02908 | 69.37818 |
| 710 | 75.97728 | 77.54314 | 73.88941 | 69.21736 |
| 709 | 75.87313 | 77.40306 | 73.74961 | 69.05661 |
| 708 | 75.75653 | 77.26259 | 73.60969 | 68.89592 |
| 707 | 75.62655 | 77.12173 | 73.46964 | 68.73531 |
| 706 | 75.48227 | 76.98049 | 73.32948 | 68.57476 |
| 705 | 75.32274 | 76.83886 | 73.1892  | 68.4143  |
| 704 | 75.14693 | 76.69684 | 73.0488  | 68.25391 |
| 703 | 74.95377 | 76.55445 | 72.9083  | 68.0936  |
| 702 | 74.74213 | 76.41168 | 72.76768 | 67.93338 |
| 701 | 74.51092 | 76.26853 | 72.62696 | 67.77324 |
| 700 | 74.2591  | 76.12501 | 72.48614 | 67.6132  |
| 699 | 73.98575 | 75.98113 | 72.34521 | 67.45324 |
| 698 | 73.69008 | 75.83687 | 72.20418 | 67.29337 |
| 697 | 73.37144 | 75.69226 | 72.06305 | 67.1336  |
| 696 | 73.02928 | 75.54728 | 71.92182 | 66.97392 |
| 695 | 72.66319 | 75.40194 | 71.7805  | 66.81434 |
| 694 | 72.2729  | 75.25624 | 71.63909 | 66.65486 |
| 693 | 71.85828 | 75.11019 | 71.49759 | 66.49548 |
| 692 | 71.41938 | 74.96379 | 71.356   | 66.33621 |
| 691 | 70.95647 | 74.81705 | 71.21432 | 66.17704 |
| 690 | 70.47005 | 74.66995 | 71.07256 | 66.01797 |
| 689 | 69.96087 | 74.52252 | 70.93072 | 65.85901 |
| 688 | 69.42992 | 74.37474 | 70.78879 | 65.70015 |
| 687 | 68.87841 | 74.22663 | 70.64678 | 65.54141 |
| 686 | 68.30777 | 74.07818 | 70.5047  | 65.38277 |
| 685 | 67.71961 | 73.9294  | 70.36254 | 65.22424 |
| 684 | 67.11562 | 73.78029 | 70.22031 | 65.06583 |

|     |          |          |          |          |
|-----|----------|----------|----------|----------|
| 683 | 66.49763 | 73.63086 | 70.078   | 64.90753 |
| 682 | 65.86745 | 73.4811  | 69.93562 | 64.74933 |
| 681 | 65.22689 | 73.33102 | 69.79317 | 64.59126 |
| 680 | 64.57776 | 73.18063 | 69.65065 | 64.43329 |
| 679 | 63.9218  | 73.02992 | 69.50806 | 64.27544 |
| 678 | 63.26069 | 72.8789  | 69.36541 | 64.1177  |
| 677 | 62.59606 | 72.72757 | 69.22269 | 63.96008 |
| 676 | 61.92946 | 72.57593 | 69.07991 | 63.80257 |
| 675 | 61.26236 | 72.42399 | 68.93706 | 63.64518 |
| 674 | 60.59613 | 72.27175 | 68.79415 | 63.4879  |
| 673 | 59.93205 | 72.11921 | 68.65119 | 63.33074 |
| 672 | 59.27134 | 71.96638 | 68.50816 | 63.17369 |
| 671 | 58.61515 | 71.81326 | 68.36508 | 63.01675 |
| 670 | 57.96464 | 71.65985 | 68.22193 | 62.85993 |
| 669 | 57.32097 | 71.50615 | 68.07874 | 62.70323 |
| 668 | 56.68533 | 71.35217 | 67.93548 | 62.54663 |
| 667 | 56.05886 | 71.19791 | 67.79217 | 62.39015 |
| 666 | 55.44264 | 71.04337 | 67.64881 | 62.23378 |
| 665 | 54.83761 | 70.88856 | 67.50539 | 62.07753 |
| 664 | 54.24457 | 70.73348 | 67.36193 | 61.92138 |
| 663 | 53.66429 | 70.57813 | 67.21841 | 61.76535 |
| 662 | 53.0975  | 70.42252 | 67.07484 | 61.60943 |
| 661 | 52.54499 | 70.26664 | 66.93122 | 61.45361 |
| 660 | 52.00761 | 70.1105  | 66.78755 | 61.2979  |
| 659 | 51.48628 | 69.95411 | 66.64383 | 61.14231 |
| 658 | 50.98197 | 69.79747 | 66.50006 | 60.98681 |
| 657 | 50.49565 | 69.64058 | 66.35625 | 60.83143 |
| 656 | 50.02824 | 69.48344 | 66.21239 | 60.67614 |
| 655 | 49.58054 | 69.32605 | 66.06848 | 60.52097 |
| 654 | 49.15326 | 69.16843 | 65.92452 | 60.36589 |
| 653 | 48.74701 | 69.01057 | 65.78052 | 60.21091 |
| 652 | 48.36225 | 68.85247 | 65.63647 | 60.05604 |
| 651 | 47.99938 | 68.69414 | 65.49238 | 59.90126 |
| 650 | 47.65865 | 68.53559 | 65.34824 | 59.74658 |
| 649 | 47.3402  | 68.37681 | 65.20406 | 59.592   |
| 648 | 47.04402 | 68.2178  | 65.05983 | 59.43751 |
| 647 | 46.76996 | 68.05858 | 64.91556 | 59.28311 |
| 646 | 46.51769 | 67.89914 | 64.77124 | 59.12881 |
| 645 | 46.28677 | 67.73949 | 64.62688 | 58.9746  |
| 644 | 46.07663 | 67.57963 | 64.48248 | 58.82047 |
| 643 | 45.88658 | 67.41956 | 64.33803 | 58.66643 |

|     |          |          |          |          |
|-----|----------|----------|----------|----------|
| 642 | 45.71581 | 67.25929 | 64.19354 | 58.51248 |
| 641 | 45.56347 | 67.09882 | 64.04901 | 58.35861 |
| 640 | 45.4286  | 66.93815 | 63.90443 | 58.20483 |
| 639 | 45.31021 | 66.77728 | 63.75981 | 58.05112 |
| 638 | 45.20729 | 66.61623 | 63.61514 | 57.8975  |
| 637 | 45.1188  | 66.45499 | 63.47043 | 57.74395 |
| 636 | 45.04371 | 66.29356 | 63.32568 | 57.59048 |
| 635 | 44.98097 | 66.13195 | 63.18088 | 57.43708 |
| 634 | 44.92952 | 65.97016 | 63.03604 | 57.28375 |
| 633 | 44.88828 | 65.8082  | 62.89116 | 57.1305  |
| 632 | 44.85613 | 65.64606 | 62.74623 | 56.97731 |
| 631 | 44.83196 | 65.48375 | 62.60125 | 56.82419 |
| 630 | 44.81462 | 65.32128 | 62.45624 | 56.67113 |
| 629 | 44.80299 | 65.15865 | 62.31117 | 56.51814 |
| 628 | 44.79594 | 64.99585 | 62.16607 | 56.36521 |
| 627 | 44.79236 | 64.8329  | 62.02091 | 56.21234 |
| 626 | 44.79113 | 64.6698  | 61.87572 | 56.05952 |
| 625 | 44.79111 | 64.50654 | 61.73047 | 55.90676 |
| 624 | 44.79112 | 64.34314 | 61.58518 | 55.75406 |
| 623 | 44.79    | 64.1796  | 61.43985 | 55.60141 |
| 622 | 44.78659 | 64.01591 | 61.29446 | 55.4488  |
| 621 | 44.77982 | 63.85209 | 61.14903 | 55.29625 |
| 620 | 44.76866 | 63.68813 | 61.00356 | 55.14374 |
| 619 | 44.75219 | 63.52404 | 60.85803 | 54.99128 |
| 618 | 44.72954 | 63.35982 | 60.71246 | 54.83886 |
| 617 | 44.69987 | 63.19547 | 60.56684 | 54.68648 |
| 616 | 44.6624  | 63.03101 | 60.42117 | 54.53414 |
| 615 | 44.61634 | 62.86642 | 60.27546 | 54.38183 |
| 614 | 44.56096 | 62.70172 | 60.12969 | 54.22957 |
| 613 | 44.49557 | 62.53691 | 59.98387 | 54.07733 |
| 612 | 44.41954 | 62.37199 | 59.83801 | 53.92513 |
| 611 | 44.33235 | 62.20696 | 59.69209 | 53.77295 |
| 610 | 44.23359 | 62.04183 | 59.54612 | 53.62081 |
| 609 | 44.12295 | 61.87659 | 59.4001  | 53.46869 |
| 608 | 44.00023 | 61.71127 | 59.25403 | 53.3166  |
| 607 | 43.86532 | 61.54584 | 59.10791 | 53.16452 |
| 606 | 43.71823 | 61.38033 | 58.96173 | 53.01247 |
| 605 | 43.55907 | 61.21473 | 58.8155  | 52.86044 |
| 604 | 43.38805 | 61.04905 | 58.66922 | 52.70843 |
| 603 | 43.20549 | 60.88328 | 58.52288 | 52.55643 |
| 602 | 43.01177 | 60.71744 | 58.37649 | 52.40445 |

|     |          |          |          |          |
|-----|----------|----------|----------|----------|
| 601 | 42.80736 | 60.55152 | 58.23005 | 52.25248 |
| 600 | 42.59276 | 60.38553 | 58.08355 | 52.10052 |
| 599 | 42.3685  | 60.21947 | 57.93699 | 51.94857 |
| 598 | 42.13517 | 60.05335 | 57.79038 | 51.79663 |
| 597 | 41.89338 | 59.88717 | 57.64372 | 51.64469 |
| 596 | 41.6438  | 59.72092 | 57.49699 | 51.49276 |
| 595 | 41.38718 | 59.55462 | 57.35021 | 51.34083 |
| 594 | 41.1243  | 59.38827 | 57.20337 | 51.18891 |
| 593 | 40.85598 | 59.22186 | 57.05648 | 51.03699 |
| 592 | 40.5831  | 59.05541 | 56.90952 | 50.88506 |
| 591 | 40.30653 | 58.88892 | 56.76251 | 50.73314 |
| 590 | 40.02719 | 58.72239 | 56.61544 | 50.58121 |
| 589 | 39.74602 | 58.55581 | 56.46831 | 50.42928 |
| 588 | 39.464   | 58.38921 | 56.32112 | 50.27734 |
| 587 | 39.18214 | 58.22257 | 56.17387 | 50.12539 |
| 586 | 38.90149 | 58.05591 | 56.02656 | 49.97344 |
| 585 | 38.62313 | 57.88921 | 55.87919 | 49.82148 |
| 584 | 38.34813 | 57.7225  | 55.73176 | 49.6695  |
| 583 | 38.07756 | 57.55577 | 55.58427 | 49.51752 |
| 582 | 37.81246 | 57.38902 | 55.43671 | 49.36553 |
| 581 | 37.55383 | 57.22227 | 55.2891  | 49.21352 |
| 580 | 37.30266 | 57.0555  | 55.14142 | 49.0615  |
| 579 | 37.05985 | 56.88872 | 54.99369 | 48.90946 |
| 578 | 36.82628 | 56.72194 | 54.84589 | 48.75741 |
| 577 | 36.60271 | 56.55516 | 54.69803 | 48.60534 |
| 576 | 36.38981 | 56.38838 | 54.5501  | 48.45326 |
| 575 | 36.18813 | 56.22161 | 54.40212 | 48.30115 |
| 574 | 35.99809 | 56.05485 | 54.25407 | 48.14903 |
| 573 | 35.82    | 55.8881  | 54.10595 | 47.99689 |
| 572 | 35.65407 | 55.72136 | 53.95778 | 47.84474 |
| 571 | 35.50041 | 55.55464 | 53.80954 | 47.69256 |
| 570 | 35.35907 | 55.38794 | 53.66124 | 47.54036 |
| 569 | 35.23002 | 55.22127 | 53.51288 | 47.38814 |
| 568 | 35.11317 | 55.05462 | 53.36446 | 47.2359  |
| 567 | 35.00837 | 54.888   | 53.21597 | 47.08364 |
| 566 | 34.91542 | 54.72141 | 53.06742 | 46.93136 |
| 565 | 34.83405 | 54.55486 | 52.91881 | 46.77906 |
| 564 | 34.76394 | 54.38835 | 52.77013 | 46.62674 |
| 563 | 34.70474 | 54.22188 | 52.62139 | 46.47439 |
| 562 | 34.65602 | 54.05546 | 52.47259 | 46.32202 |
| 561 | 34.61733 | 53.88908 | 52.32373 | 46.16963 |

|     |          |          |          |          |
|-----|----------|----------|----------|----------|
| 560 | 34.58818 | 53.72275 | 52.17481 | 46.01723 |
| 559 | 34.56807 | 53.55648 | 52.02582 | 45.86479 |
| 558 | 34.55651 | 53.39026 | 51.87678 | 45.71234 |
| 557 | 34.55303 | 53.2241  | 51.72767 | 45.55987 |
| 556 | 34.55725 | 53.058   | 51.57851 | 45.40738 |
| 555 | 34.56878 | 52.89197 | 51.42928 | 45.25487 |
| 554 | 34.58731 | 52.72601 | 51.27999 | 45.10233 |
| 553 | 34.61253 | 52.56012 | 51.13065 | 44.94978 |
| 552 | 34.6441  | 52.3943  | 50.98125 | 44.79721 |
| 551 | 34.68166 | 52.22856 | 50.83178 | 44.64463 |
| 550 | 34.72482 | 52.06289 | 50.68226 | 44.49202 |
| 549 | 34.77313 | 51.89731 | 50.53269 | 44.3394  |
| 548 | 34.82615 | 51.73182 | 50.38305 | 44.18677 |
| 547 | 34.88342 | 51.56641 | 50.23336 | 44.03411 |
| 546 | 34.9445  | 51.4011  | 50.08362 | 43.88145 |
| 545 | 35.00892 | 51.23588 | 49.93382 | 43.72877 |
| 544 | 35.07623 | 51.07075 | 49.78397 | 43.57608 |
| 543 | 35.14594 | 50.90573 | 49.63406 | 43.42338 |
| 542 | 35.21753 | 50.7408  | 49.4841  | 43.27067 |
| 541 | 35.29044 | 50.57599 | 49.33409 | 43.11796 |
| 540 | 35.36408 | 50.41128 | 49.18403 | 42.96523 |
| 539 | 35.43786 | 50.24668 | 49.03392 | 42.8125  |
| 538 | 35.51116 | 50.08219 | 48.88377 | 42.65976 |
| 537 | 35.58336 | 49.91782 | 48.73356 | 42.50702 |
| 536 | 35.65385 | 49.75357 | 48.58331 | 42.35428 |
| 535 | 35.72203 | 49.58945 | 48.43301 | 42.20154 |
| 534 | 35.78736 | 49.42544 | 48.28267 | 42.0488  |
| 533 | 35.84929 | 49.26157 | 48.13228 | 41.89607 |
| 532 | 35.90738 | 49.09782 | 47.98185 | 41.74334 |
| 531 | 35.96122 | 48.93421 | 47.83139 | 41.59061 |
| 530 | 36.0105  | 48.77073 | 47.68088 | 41.4379  |
| 529 | 36.05494 | 48.60739 | 47.53033 | 41.28519 |
| 528 | 36.09432 | 48.44419 | 47.37975 | 41.1325  |
| 527 | 36.12846 | 48.28114 | 47.22913 | 40.97982 |
| 526 | 36.15719 | 48.11823 | 47.07847 | 40.82716 |
| 525 | 36.18036 | 47.95547 | 46.92779 | 40.67451 |
| 524 | 36.19786 | 47.79286 | 46.77707 | 40.52189 |
| 523 | 36.20957 | 47.63041 | 46.62632 | 40.36929 |
| 522 | 36.21543 | 47.46812 | 46.47554 | 40.21671 |
| 521 | 36.21535 | 47.30598 | 46.32474 | 40.06416 |
| 520 | 36.20929 | 47.14401 | 46.17391 | 39.91164 |

|     |          |          |          |          |
|-----|----------|----------|----------|----------|
| 519 | 36.19723 | 46.9822  | 46.02306 | 39.75915 |
| 518 | 36.17919 | 46.82056 | 45.87219 | 39.6067  |
| 517 | 36.15524 | 46.65909 | 45.7213  | 39.45429 |
| 516 | 36.1255  | 46.49779 | 45.57039 | 39.30191 |
| 515 | 36.09019 | 46.33666 | 45.41946 | 39.14958 |
| 514 | 36.04955 | 46.17572 | 45.26852 | 38.99729 |
| 513 | 36.00382 | 46.01495 | 45.11757 | 38.84505 |
| 512 | 35.95327 | 45.85437 | 44.96661 | 38.69286 |
| 511 | 35.89812 | 45.69398 | 44.81563 | 38.54072 |
| 510 | 35.83859 | 45.53377 | 44.66466 | 38.38864 |
| 509 | 35.77488 | 45.37375 | 44.51368 | 38.23662 |
| 508 | 35.70719 | 45.21393 | 44.36269 | 38.08466 |
| 507 | 35.63576 | 45.0543  | 44.21171 | 37.93276 |
| 506 | 35.56086 | 44.89487 | 44.06073 | 37.78093 |
| 505 | 35.4828  | 44.73564 | 43.90975 | 37.62918 |
| 504 | 35.40187 | 44.57662 | 43.75878 | 37.4775  |
| 503 | 35.31838 | 44.4178  | 43.60782 | 37.32589 |
| 502 | 35.2326  | 44.25918 | 43.45687 | 37.17437 |
| 501 | 35.14478 | 44.10078 | 43.30594 | 37.02293 |
| 500 | 35.05512 | 43.94259 | 43.15502 | 36.87158 |
| 499 | 34.96382 | 43.78462 | 43.00412 | 36.72032 |
| 498 | 34.87107 | 43.62687 | 42.85325 | 36.56916 |
| 497 | 34.77701 | 43.46933 | 42.70239 | 36.41809 |
| 496 | 34.6818  | 43.31202 | 42.55157 | 36.26712 |
| 495 | 34.58558 | 43.15493 | 42.40077 | 36.11626 |
| 494 | 34.48847 | 42.99807 | 42.25001 | 35.96551 |
| 493 | 34.3906  | 42.84145 | 42.09928 | 35.81486 |
| 492 | 34.29211 | 42.68505 | 41.94859 | 35.66434 |
| 491 | 34.19315 | 42.52889 | 41.79794 | 35.51393 |
| 490 | 34.0939  | 42.37296 | 41.64733 | 35.36365 |
| 489 | 33.99456 | 42.21727 | 41.49677 | 35.21349 |
| 488 | 33.89534 | 42.06183 | 41.34626 | 35.06347 |
| 487 | 33.79643 | 41.90663 | 41.1958  | 34.91357 |
| 486 | 33.69804 | 41.75168 | 41.04539 | 34.76382 |
| 485 | 33.60037 | 41.59697 | 40.89505 | 34.61421 |
| 484 | 33.50362 | 41.44252 | 40.74476 | 34.46474 |
| 483 | 33.40798 | 41.28831 | 40.59454 | 34.31543 |
| 482 | 33.31369 | 41.13437 | 40.44439 | 34.16627 |
| 481 | 33.22096 | 40.98068 | 40.29431 | 34.01727 |
| 480 | 33.13006 | 40.82725 | 40.1443  | 33.86843 |
| 479 | 33.04129 | 40.67408 | 39.99437 | 33.71975 |

|     |          |          |          |          |
|-----|----------|----------|----------|----------|
| 478 | 32.95498 | 40.52118 | 39.84452 | 33.57125 |
| 477 | 32.8715  | 40.36855 | 39.69475 | 33.42292 |
| 476 | 32.79123 | 40.21618 | 39.54508 | 33.27477 |
| 475 | 32.7146  | 40.06408 | 39.39549 | 33.1268  |
| 474 | 32.64195 | 39.91226 | 39.24599 | 32.97902 |
| 473 | 32.57361 | 39.76071 | 39.0966  | 32.83143 |
| 472 | 32.50976 | 39.60944 | 38.9473  | 32.68403 |
| 471 | 32.4505  | 39.45845 | 38.79811 | 32.53684 |
| 470 | 32.3958  | 39.30774 | 38.64903 | 32.38985 |
| 469 | 32.34553 | 39.15732 | 38.50006 | 32.24307 |
| 468 | 32.29952 | 39.00718 | 38.35121 | 32.0965  |
| 467 | 32.25756 | 38.85733 | 38.20247 | 31.95015 |
| 466 | 32.21946 | 38.70777 | 38.05386 | 31.80402 |
| 465 | 32.18507 | 38.5585  | 37.90537 | 31.65811 |
| 464 | 32.15425 | 38.40952 | 37.75702 | 31.51244 |
| 463 | 32.12695 | 38.26085 | 37.6088  | 31.367   |
| 462 | 32.10314 | 38.11247 | 37.46071 | 31.2218  |
| 461 | 32.08285 | 37.96439 | 37.31277 | 31.07684 |
| 460 | 32.06613 | 37.81661 | 37.16497 | 30.93213 |
| 459 | 32.05303 | 37.66914 | 37.01733 | 30.78768 |
| 458 | 32.04359 | 37.52197 | 36.86983 | 30.64348 |
| 457 | 32.0378  | 37.37512 | 36.7225  | 30.49954 |
| 456 | 32.03564 | 37.22857 | 36.57532 | 30.35587 |
| 455 | 32.03701 | 37.08234 | 36.42831 | 30.21246 |
| 454 | 32.04183 | 36.93642 | 36.28147 | 30.06934 |
| 453 | 32.05    | 36.79082 | 36.1348  | 29.92649 |
| 452 | 32.06142 | 36.64553 | 35.98831 | 29.78393 |
| 451 | 32.07609 | 36.50057 | 35.842   | 29.64165 |
| 450 | 32.09403 | 36.35593 | 35.69588 | 29.49967 |
| 449 | 32.11527 | 36.21161 | 35.54995 | 29.35799 |
| 448 | 32.1398  | 36.06762 | 35.4042  | 29.21661 |
| 447 | 32.16763 | 35.92396 | 35.25866 | 29.07553 |
| 446 | 32.19871 | 35.78062 | 35.11332 | 28.93477 |
| 445 | 32.23294 | 35.63762 | 34.96819 | 28.79432 |
| 444 | 32.27007 | 35.49495 | 34.82326 | 28.65419 |
| 443 | 32.3099  | 35.35262 | 34.67855 | 28.51439 |
| 442 | 32.35227 | 35.21063 | 34.53406 | 28.37492 |
| 441 | 32.39704 | 35.06897 | 34.3898  | 28.23578 |
| 440 | 32.44398 | 34.92766 | 34.24576 | 28.09698 |
| 439 | 32.49268 | 34.78668 | 34.10195 | 27.95852 |
| 438 | 32.54276 | 34.64605 | 33.95838 | 27.82041 |

|     |          |          |          |          |
|-----|----------|----------|----------|----------|
| 437 | 32.59408 | 34.50577 | 33.81504 | 27.68265 |
| 436 | 32.64671 | 34.36584 | 33.67196 | 27.54525 |
| 435 | 32.70069 | 34.22625 | 33.52912 | 27.40821 |
| 434 | 32.75584 | 34.08702 | 33.38653 | 27.27153 |
| 433 | 32.81181 | 33.94814 | 33.24421 | 27.13523 |
| 432 | 32.86825 | 33.80962 | 33.10214 | 26.9993  |
| 431 | 32.92481 | 33.67145 | 32.96034 | 26.86374 |
| 430 | 32.98113 | 33.53364 | 32.81882 | 26.72857 |
| 429 | 33.03686 | 33.39619 | 32.67756 | 26.59379 |
| 428 | 33.09174 | 33.25911 | 32.53659 | 26.4594  |
| 427 | 33.14566 | 33.12238 | 32.3959  | 26.32541 |
| 426 | 33.19859 | 32.98602 | 32.2555  | 26.19182 |
| 425 | 33.25055 | 32.85003 | 32.11539 | 26.05864 |
| 424 | 33.3016  | 32.71441 | 31.97558 | 25.92586 |
| 423 | 33.35182 | 32.57915 | 31.83607 | 25.7935  |
| 422 | 33.40126 | 32.44427 | 31.69687 | 25.66155 |
| 421 | 33.44994 | 32.30976 | 31.55798 | 25.53003 |
| 420 | 33.49783 | 32.17563 | 31.4194  | 25.39894 |
| 419 | 33.54486 | 32.04187 | 31.28114 | 25.26827 |
| 418 | 33.59088 | 31.90849 | 31.14321 | 25.13804 |
| 417 | 33.63564 | 31.77549 | 31.0056  | 25.00826 |
| 416 | 33.67881 | 31.64287 | 30.86833 | 24.87891 |
| 415 | 33.72002 | 31.51063 | 30.7314  | 24.75001 |
| 414 | 33.75887 | 31.37878 | 30.5948  | 24.62157 |
| 413 | 33.79506 | 31.24731 | 30.45855 | 24.49358 |
| 412 | 33.82834 | 31.11623 | 30.32265 | 24.36605 |
| 411 | 33.8586  | 30.98554 | 30.18711 | 24.23899 |
| 410 | 33.88579 | 30.85524 | 30.05192 | 24.11239 |
| 409 | 33.90992 | 30.72533 | 29.9171  | 23.98627 |
| 408 | 33.931   | 30.59581 | 29.78265 | 23.86062 |
| 407 | 33.94891 | 30.46669 | 29.64857 | 23.73546 |
| 406 | 33.96343 | 30.33796 | 29.51486 | 23.61077 |
| 405 | 33.97427 | 30.20963 | 29.38154 | 23.48658 |
| 404 | 33.98109 | 30.0817  | 29.2486  | 23.36288 |
| 403 | 33.98353 | 29.95417 | 29.11605 | 23.23967 |
| 402 | 33.98116 | 29.82704 | 28.9839  | 23.11696 |
| 401 | 33.97375 | 29.70031 | 28.85214 | 22.99476 |
| 400 | 33.96132 | 29.57398 | 28.72079 | 22.87306 |
| 399 | 33.944   | 29.44806 | 28.58984 | 22.75188 |
| 398 | 33.92195 | 29.32255 | 28.4593  | 22.63121 |
| 397 | 33.89547 | 29.19745 | 28.32918 | 22.51105 |



|     |          |          |          |          |
|-----|----------|----------|----------|----------|
| 396 | 33.86528 | 29.07275 | 28.19948 | 22.39142 |
| 395 | 33.83249 | 28.94847 | 28.0702  | 22.27232 |
| 394 | 33.79814 | 28.8246  | 27.94135 | 22.15374 |
| 393 | 33.76271 | 28.70114 | 27.81293 | 22.03569 |
| 392 | 33.72608 | 28.5781  | 27.68495 | 21.91818 |
| 391 | 33.68805 | 28.45547 | 27.55741 | 21.80121 |
| 390 | 33.64873 | 28.33325 | 27.43031 | 21.68479 |
| 389 | 33.60848 | 28.21146 | 27.30366 | 21.5689  |
| 388 | 33.56762 | 28.09009 | 27.17747 | 21.45357 |
| 387 | 33.52647 | 27.96913 | 27.05173 | 21.33879 |
| 386 | 33.48547 | 27.8486  | 26.92645 | 21.22457 |
| 385 | 33.44517 | 27.72849 | 26.80163 | 21.1109  |
| 384 | 33.40603 | 27.6088  | 26.67729 | 20.9978  |
| 383 | 33.36841 | 27.48954 | 26.55342 | 20.88526 |
| 382 | 33.33262 | 27.37071 | 26.43002 | 20.77328 |
| 381 | 33.29897 | 27.2523  | 26.3071  | 20.66188 |
| 380 | 33.2677  | 27.13432 | 26.18467 | 20.55106 |
| 379 | 33.23906 | 27.01677 | 26.06272 | 20.44081 |
| 378 | 33.2133  | 26.89965 | 25.94127 | 20.33114 |
| 377 | 33.19069 | 26.78297 | 25.82031 | 20.22205 |
| 376 | 33.17149 | 26.66671 | 25.69985 | 20.11355 |
| 375 | 33.15597 | 26.55089 | 25.5799  | 20.00564 |
| 374 | 33.1444  | 26.43551 | 25.46045 | 19.89832 |
| 373 | 33.13711 | 26.32056 | 25.34151 | 19.79159 |
| 372 | 33.13454 | 26.20605 | 25.22309 | 19.68545 |
| 371 | 33.13722 | 26.09197 | 25.10518 | 19.57992 |
| 370 | 33.14572 | 25.97834 | 24.98779 | 19.47499 |
| 369 | 33.16057 | 25.86514 | 24.87093 | 19.37066 |
| 368 | 33.18215 | 25.75238 | 24.7546  | 19.26693 |
| 367 | 33.21065 | 25.64007 | 24.63879 | 19.16382 |
| 366 | 33.24613 | 25.5282  | 24.52353 | 19.06131 |
| 365 | 33.28857 | 25.41677 | 24.4088  | 18.95942 |
| 364 | 33.33796 | 25.30579 | 24.29461 | 18.85814 |
| 363 | 33.39442 | 25.19525 | 24.18096 | 18.75748 |
| 362 | 33.4582  | 25.08516 | 24.06787 | 18.65744 |
| 361 | 33.52973 | 24.97552 | 23.95532 | 18.55802 |
| 360 | 33.60952 | 24.86632 | 23.84333 | 18.45923 |
| 359 | 33.69822 | 24.75757 | 23.7319  | 18.36106 |
| 358 | 33.79649 | 24.64927 | 23.62102 | 18.26352 |
| 357 | 33.90489 | 24.54143 | 23.51071 | 18.1666  |
| 356 | 34.02374 | 24.43403 | 23.40097 | 18.07032 |

|     |          |          |          |          |
|-----|----------|----------|----------|----------|
| 355 | 34.1531  | 24.32709 | 23.2918  | 17.97467 |
| 354 | 34.29285 | 24.22059 | 23.18319 | 17.87966 |
| 353 | 34.4425  | 24.11456 | 23.07517 | 17.78528 |
| 352 | 34.60119 | 24.00897 | 22.96772 | 17.69154 |
| 351 | 34.76777 | 23.90384 | 22.86085 | 17.59844 |
| 350 | 34.9411  | 23.79917 | 22.75457 | 17.50598 |
| 349 | 35.12043 | 23.69495 | 22.64887 | 17.41416 |
| 348 | 35.30546 | 23.59119 | 22.54376 | 17.32298 |
| 347 | 35.49601 | 23.48789 | 22.43924 | 17.23245 |
| 346 | 35.69176 | 23.38505 | 22.33531 | 17.14257 |
| 345 | 35.89221 | 23.28266 | 22.23198 | 17.05334 |
| 344 | 36.09678 | 23.18074 | 22.12925 | 16.96475 |
| 343 | 36.30481 | 23.07927 | 22.02712 | 16.87681 |
| 342 | 36.51559 | 22.97827 | 21.9256  | 16.78953 |
| 341 | 36.72835 | 22.87773 | 21.82468 | 16.70289 |
| 340 | 36.94246 | 22.77765 | 21.72436 | 16.61691 |
| 339 | 37.15746 | 22.67803 | 21.62466 | 16.53158 |
| 338 | 37.37299 | 22.57888 | 21.52557 | 16.44691 |
| 337 | 37.58882 | 22.48019 | 21.4271  | 16.36289 |
| 336 | 37.80482 | 22.38196 | 21.32924 | 16.27953 |
| 335 | 38.02091 | 22.2842  | 21.232   | 16.19683 |
| 334 | 38.23699 | 22.18691 | 21.13537 | 16.11478 |
| 333 | 38.45289 | 22.09008 | 21.03938 | 16.0334  |
| 332 | 38.66835 | 21.99371 | 20.944   | 15.95267 |
| 331 | 38.88304 | 21.89782 | 20.84925 | 15.8726  |
| 330 | 39.09657 | 21.80239 | 20.75513 | 15.79319 |
| 329 | 39.30844 | 21.70743 | 20.66164 | 15.71444 |
| 328 | 39.51802 | 21.61293 | 20.56877 | 15.63635 |
| 327 | 39.72457 | 21.51891 | 20.47654 | 15.55892 |
| 326 | 39.92733 | 21.42535 | 20.38495 | 15.48215 |
| 325 | 40.12567 | 21.33227 | 20.29398 | 15.40604 |
| 324 | 40.31906 | 21.23965 | 20.20366 | 15.33059 |
| 323 | 40.50685 | 21.1475  | 20.11397 | 15.25581 |
| 322 | 40.68858 | 21.05583 | 20.02492 | 15.18168 |
| 321 | 40.86427 | 20.96462 | 19.93652 | 15.10822 |
| 320 | 41.03407 | 20.87389 | 19.84875 | 15.03542 |
| 319 | 41.19805 | 20.78362 | 19.76163 | 14.96328 |
| 318 | 41.35612 | 20.69383 | 19.67515 | 14.8918  |
| 317 | 41.50811 | 20.60451 | 19.58931 | 14.82098 |
| 316 | 41.65372 | 20.51566 | 19.50412 | 14.75082 |
| 315 | 41.79261 | 20.42728 | 19.41958 | 14.68131 |

|     |          |          |          |          |
|-----|----------|----------|----------|----------|
| 314 | 41.92443 | 20.33938 | 19.33568 | 14.61247 |
| 313 | 42.04886 | 20.25195 | 19.25243 | 14.54429 |
| 312 | 42.16576 | 20.16499 | 19.16983 | 14.47676 |
| 311 | 42.27514 | 20.0785  | 19.08788 | 14.4099  |
| 310 | 42.37723 | 19.99249 | 19.00659 | 14.34368 |
| 309 | 42.47245 | 19.90695 | 18.92594 | 14.27813 |
| 308 | 42.56134 | 19.82189 | 18.84594 | 14.21323 |
| 307 | 42.64451 | 19.7373  | 18.76659 | 14.14898 |
| 306 | 42.7225  | 19.65318 | 18.6879  | 14.08539 |
| 305 | 42.79565 | 19.56953 | 18.60985 | 14.02245 |
| 304 | 42.86414 | 19.48636 | 18.53246 | 13.96017 |
| 303 | 42.928   | 19.40367 | 18.45572 | 13.89853 |
| 302 | 42.9873  | 19.32144 | 18.37964 | 13.83754 |
| 301 | 43.0423  | 19.2397  | 18.30421 | 13.77721 |
| 300 | 43.09354 | 19.15842 | 18.22943 | 13.71752 |
| 299 | 43.14173 | 19.07762 | 18.1553  | 13.65847 |
| 298 | 43.18754 | 18.9973  | 18.08183 | 13.60007 |
| 297 | 43.23153 | 18.91744 | 18.00901 | 13.54231 |
| 296 | 43.27399 | 18.83806 | 17.93684 | 13.4852  |
| 295 | 43.31503 | 18.75916 | 17.86532 | 13.42873 |
| 294 | 43.35456 | 18.68073 | 17.79445 | 13.37289 |
| 293 | 43.3924  | 18.60277 | 17.72424 | 13.3177  |
| 292 | 43.42827 | 18.52529 | 17.65468 | 13.26313 |
| 291 | 43.46188 | 18.44828 | 17.58577 | 13.20921 |
| 290 | 43.49299 | 18.37174 | 17.5175  | 13.15591 |
| 289 | 43.52149 | 18.29568 | 17.44989 | 13.10325 |
| 288 | 43.54737 | 18.22009 | 17.38293 | 13.05122 |
| 287 | 43.57077 | 18.14497 | 17.31661 | 12.99981 |
| 286 | 43.59186 | 18.07033 | 17.25094 | 12.94903 |
| 285 | 43.61086 | 17.99616 | 17.18592 | 12.89888 |
| 284 | 43.62805 | 17.92246 | 17.12154 | 12.84934 |
| 283 | 43.6437  | 17.84923 | 17.05781 | 12.80042 |
| 282 | 43.65803 | 17.77647 | 16.99472 | 12.75213 |
| 281 | 43.67111 | 17.70419 | 16.93227 | 12.70444 |
| 280 | 43.68321 | 17.63238 | 16.87047 | 12.65737 |

**Fig 3 data:**

| <b>2tata</b>  | <b>intensity</b> | <b>intensity</b> | <b>intensity</b> | <b>intensity</b> |
|---------------|------------------|------------------|------------------|------------------|
| <b>(deg.)</b> | <b>(a.u)</b>     | <b>(a.u)</b>     | <b>(a.u)</b>     | <b>(a.u)</b>     |
| 20.024        | 4091.44735       | 1218             | 2067             | 1198             |
| 20.057        | 4096.4072        | 1269             | 1987             | 1206             |
| 20.09         | 4101.17414       | 1254             | 2074             | 1198             |
| 20.123        | 4105.75022       | 1262             | 2027             | 1225             |
| 20.156        | 4110.13746       | 1254             | 2066             | 1234             |
| 20.189        | 4114.33788       | 1350             | 2106             | 1299             |
| 20.222        | 4118.35347       | 1323             | 2056             | 1260             |
| 20.255        | 4122.18622       | 1281             | 2025             | 1252             |
| 20.288        | 4125.8381        | 1322             | 1987             | 1262             |
| 20.321        | 4129.31109       | 1335             | 2055             | 1278             |
| 20.354        | 4132.60712       | 1370             | 2058             | 1226             |
| 20.387        | 4135.72814       | 1335             | 2094             | 1277             |
| 20.42         | 4138.67607       | 1363             | 2063             | 1284             |
| 20.453        | 4141.45282       | 1312             | 2067             | 1242             |
| 20.486        | 4144.0603        | 1309             | 1949             | 1217             |
| 20.519        | 4146.5004        | 1381             | 2042             | 1260             |
| 20.552        | 4148.775         | 1296             | 2028             | 1247             |
| 20.585        | 4150.88595       | 1332             | 1981             | 1246             |
| 20.618        | 4152.83511       | 1352             | 2031             | 1274             |
| 20.651        | 4154.62433       | 1323             | 2086             | 1216             |
| 20.684        | 4156.25543       | 1297             | 2109             | 1237             |
| 20.717        | 4157.73023       | 1359             | 2042             | 1335             |
| 20.75         | 4159.05054       | 1361             | 2103             | 1318             |
| 20.783        | 4160.21815       | 1362             | 2110             | 1249             |
| 20.816        | 4161.23484       | 1323             | 2044             | 1279             |
| 20.849        | 4162.10238       | 1349             | 2003             | 1215             |
| 20.882        | 4162.82254       | 1395             | 2087             | 1223             |
| 20.915        | 4163.39705       | 1386             | 2059             | 1281             |
| 20.948        | 4163.82765       | 1323             | 2050             | 1318             |
| 20.981        | 4164.11608       | 1386             | 2046             | 1282             |
| 21.014        | 4164.26403       | 1433             | 2045             | 1280             |
| 21.047        | 4164.27321       | 1343             | 2129             | 1268             |
| 21.08         | 4164.14532       | 1332             | 2120             | 1299             |
| 21.113        | 4163.88202       | 1391             | 2104             | 1304             |
| 21.146        | 4163.48498       | 1377             | 2150             | 1301             |
| 21.179        | 4162.95586       | 1428             | 2130             | 1360             |
| 21.212        | 4162.29631       | 1460             | 2125             | 1337             |
| 21.245        | 4161.50794       | 1421             | 2154             | 1335             |

|        |            |      |      |      |
|--------|------------|------|------|------|
| 21.278 | 4160.5924  | 1438 | 2128 | 1377 |
| 21.311 | 4159.55128 | 1471 | 2108 | 1325 |
| 21.344 | 4158.38619 | 1454 | 2071 | 1307 |
| 21.377 | 4157.09871 | 1416 | 2118 | 1329 |
| 21.41  | 4155.69041 | 1444 | 2163 | 1327 |
| 21.443 | 4154.16288 | 1489 | 2112 | 1344 |
| 21.476 | 4152.51765 | 1466 | 2124 | 1343 |
| 21.509 | 4150.75627 | 1450 | 2164 | 1355 |
| 21.542 | 4148.88028 | 1459 | 2171 | 1407 |
| 21.575 | 4146.89119 | 1469 | 2153 | 1418 |
| 21.608 | 4144.79052 | 1461 | 2186 | 1376 |
| 21.641 | 4142.57977 | 1464 | 2222 | 1355 |
| 21.674 | 4140.26042 | 1513 | 2241 | 1379 |
| 21.707 | 4137.83396 | 1530 | 2184 | 1378 |
| 21.74  | 4135.30185 | 1513 | 2180 | 1331 |
| 21.773 | 4132.66554 | 1490 | 2223 | 1377 |
| 21.806 | 4129.92649 | 1479 | 2167 | 1415 |
| 21.839 | 4127.08613 | 1516 | 2122 | 1374 |
| 21.872 | 4124.14589 | 1560 | 2191 | 1395 |
| 21.905 | 4121.10718 | 1535 | 2257 | 1429 |
| 21.938 | 4117.97139 | 1571 | 2225 | 1433 |
| 21.971 | 4114.73994 | 1542 | 2218 | 1438 |
| 22.004 | 4111.41419 | 1503 | 2276 | 1432 |
| 22.037 | 4107.99553 | 1469 | 2212 | 1358 |
| 22.07  | 4104.48531 | 1583 | 2228 | 1447 |
| 22.103 | 4100.88489 | 1613 | 2190 | 1416 |
| 22.136 | 4097.19561 | 1562 | 2230 | 1426 |
| 22.169 | 4093.41879 | 1592 | 2199 | 1474 |
| 22.202 | 4089.55577 | 1557 | 2278 | 1396 |
| 22.235 | 4085.60784 | 1552 | 2267 | 1450 |
| 22.268 | 4081.57632 | 1568 | 2301 | 1457 |
| 22.301 | 4077.46249 | 1581 | 2278 | 1403 |
| 22.334 | 4073.26764 | 1640 | 2253 | 1469 |
| 22.367 | 4068.99303 | 1574 | 2269 | 1467 |
| 22.4   | 4064.63992 | 1582 | 2343 | 1444 |
| 22.433 | 4060.20957 | 1574 | 2321 | 1473 |
| 22.466 | 4055.70322 | 1565 | 2256 | 1521 |
| 22.499 | 4051.12209 | 1619 | 2283 | 1494 |
| 22.532 | 4046.46741 | 1578 | 2274 | 1478 |
| 22.565 | 4041.74039 | 1535 | 2197 | 1496 |
| 22.598 | 4036.94223 | 1525 | 2314 | 1526 |

|        |            |      |      |      |
|--------|------------|------|------|------|
| 22.631 | 4032.07413 | 1682 | 2381 | 1390 |
| 22.664 | 4027.13726 | 1652 | 2292 | 1537 |
| 22.697 | 4022.13279 | 1671 | 2374 | 1427 |
| 22.73  | 4017.06189 | 1616 | 2270 | 1447 |
| 22.763 | 4011.92572 | 1707 | 2288 | 1604 |
| 22.796 | 4006.72542 | 1691 | 2387 | 1501 |
| 22.829 | 4001.46211 | 1576 | 2369 | 1572 |
| 22.862 | 3996.13693 | 1676 | 2294 | 1482 |
| 22.895 | 3990.75099 | 1617 | 2392 | 1508 |
| 22.928 | 3985.30539 | 1655 | 2362 | 1545 |
| 22.961 | 3979.80124 | 1580 | 2359 | 1550 |
| 22.994 | 3974.23962 | 1669 | 2364 | 1535 |
| 23.027 | 3968.62161 | 1646 | 2356 | 1519 |
| 23.06  | 3962.94827 | 1662 | 2390 | 1552 |
| 23.093 | 3957.22066 | 1637 | 2349 | 1520 |
| 23.126 | 3951.43985 | 1679 | 2375 | 1516 |
| 23.159 | 3945.60685 | 1734 | 2381 | 1528 |
| 23.192 | 3939.72272 | 1690 | 2437 | 1580 |
| 23.225 | 3933.78847 | 1681 | 2378 | 1627 |
| 23.258 | 3927.80512 | 1670 | 2481 | 1633 |
| 23.291 | 3921.77366 | 1706 | 2439 | 1618 |
| 23.324 | 3915.6951  | 1715 | 2333 | 1565 |
| 23.357 | 3909.57042 | 1700 | 2393 | 1597 |
| 23.39  | 3903.40061 | 1714 | 2442 | 1570 |
| 23.423 | 3897.18662 | 1747 | 2352 | 1615 |
| 23.456 | 3890.92943 | 1777 | 2381 | 1569 |
| 23.489 | 3884.62998 | 1721 | 2407 | 1585 |
| 23.522 | 3878.28921 | 1749 | 2341 | 1631 |
| 23.555 | 3871.90807 | 1797 | 2323 | 1608 |
| 23.588 | 3865.48747 | 1755 | 2439 | 1630 |
| 23.621 | 3859.02833 | 1745 | 2464 | 1576 |
| 23.654 | 3852.53156 | 1767 | 2355 | 1566 |
| 23.687 | 3845.99807 | 1798 | 2369 | 1626 |
| 23.72  | 3839.42873 | 1843 | 2403 | 1655 |
| 23.753 | 3832.82444 | 1818 | 2406 | 1636 |
| 23.786 | 3826.18607 | 1790 | 2469 | 1597 |
| 23.819 | 3819.51449 | 1825 | 2492 | 1595 |
| 23.852 | 3812.81055 | 1806 | 2502 | 1634 |
| 23.885 | 3806.0751  | 1818 | 2473 | 1662 |
| 23.918 | 3799.30899 | 1832 | 2422 | 1664 |
| 23.951 | 3792.51304 | 1764 | 2424 | 1666 |

|        |            |      |      |      |
|--------|------------|------|------|------|
| 23.984 | 3785.68808 | 1747 | 2467 | 1679 |
| 24.017 | 3778.83493 | 1803 | 2449 | 1660 |
| 24.05  | 3771.9544  | 1824 | 2422 | 1636 |
| 24.083 | 3765.04728 | 1771 | 2489 | 1679 |
| 24.116 | 3758.11437 | 1769 | 2457 | 1683 |
| 24.149 | 3751.15645 | 1807 | 2447 | 1627 |
| 24.182 | 3744.1743  | 1796 | 2501 | 1625 |
| 24.215 | 3737.16869 | 1789 | 2428 | 1663 |
| 24.248 | 3730.14037 | 1806 | 2425 | 1712 |
| 24.281 | 3723.09011 | 1854 | 2490 | 1692 |
| 24.314 | 3716.01864 | 1832 | 2498 | 1635 |
| 24.347 | 3708.92669 | 1838 | 2481 | 1672 |
| 24.38  | 3701.81501 | 1856 | 2501 | 1745 |
| 24.413 | 3694.68431 | 1857 | 2485 | 1702 |
| 24.446 | 3687.53531 | 1859 | 2525 | 1710 |
| 24.479 | 3680.3687  | 1854 | 2467 | 1675 |
| 24.512 | 3673.18519 | 1801 | 2457 | 1640 |
| 24.545 | 3665.98547 | 1857 | 2502 | 1734 |
| 24.578 | 3658.77023 | 1851 | 2517 | 1724 |
| 24.611 | 3651.54013 | 1889 | 2533 | 1685 |
| 24.644 | 3644.29585 | 1933 | 2537 | 1703 |
| 24.677 | 3637.03804 | 1894 | 2589 | 1720 |
| 24.71  | 3629.76737 | 1907 | 2586 | 1711 |
| 24.743 | 3622.48447 | 1870 | 2607 | 1715 |
| 24.776 | 3615.18999 | 1841 | 2557 | 1710 |
| 24.809 | 3607.88455 | 1812 | 2543 | 1674 |
| 24.842 | 3600.56879 | 1880 | 2571 | 1728 |
| 24.875 | 3593.24331 | 1832 | 2569 | 1691 |
| 24.908 | 3585.90873 | 1862 | 2513 | 1804 |
| 24.941 | 3578.56564 | 1871 | 2532 | 1740 |
| 24.974 | 3571.21466 | 1827 | 2496 | 1725 |
| 25.007 | 3563.85636 | 1968 | 2575 | 1735 |
| 25.04  | 3556.49132 | 1864 | 2626 | 1787 |
| 25.073 | 3549.12012 | 1959 | 2566 | 1771 |
| 25.106 | 3541.74333 | 1908 | 2603 | 1766 |
| 25.139 | 3534.36151 | 1982 | 2588 | 1800 |
| 25.172 | 3526.97521 | 1902 | 2629 | 1714 |
| 25.205 | 3519.58498 | 1985 | 2665 | 1711 |
| 25.238 | 3512.19136 | 1914 | 2753 | 1682 |
| 25.271 | 3504.79487 | 1880 | 2649 | 1789 |
| 25.304 | 3497.39606 | 1938 | 2675 | 1879 |

|        |            |      |      |      |
|--------|------------|------|------|------|
| 25.337 | 3489.99544 | 1939 | 2897 | 1865 |
| 25.37  | 3482.59351 | 2037 | 2884 | 1733 |
| 25.403 | 3475.1908  | 1926 | 2902 | 1850 |
| 25.436 | 3467.78779 | 2009 | 2768 | 1801 |
| 25.469 | 3460.38498 | 1932 | 2670 | 1855 |
| 25.502 | 3452.98287 | 1877 | 2649 | 1790 |
| 25.535 | 3445.58192 | 1926 | 2598 | 1723 |
| 25.568 | 3438.18261 | 1851 | 2497 | 1680 |
| 25.601 | 3430.78542 | 1901 | 2498 | 1680 |
| 25.634 | 3423.3908  | 1890 | 2424 | 1698 |
| 25.667 | 3415.9992  | 1863 | 2584 | 1626 |
| 25.7   | 3408.61108 | 1766 | 2599 | 1678 |
| 25.733 | 3401.22688 | 1887 | 2499 | 1745 |
| 25.766 | 3393.84704 | 1892 | 2532 | 1647 |
| 25.799 | 3386.47198 | 1920 | 2496 | 1713 |
| 25.832 | 3379.10213 | 1949 | 2556 | 1733 |
| 25.865 | 3371.7379  | 1896 | 2473 | 1771 |
| 25.898 | 3364.37971 | 1853 | 2448 | 1771 |
| 25.931 | 3357.02797 | 1870 | 2489 | 1745 |
| 25.964 | 3349.68307 | 1820 | 2459 | 1697 |
| 25.997 | 3342.34541 | 1833 | 2420 | 1728 |
| 26.03  | 3335.01538 | 1836 | 2417 | 1654 |
| 26.063 | 3327.69335 | 1829 | 2378 | 1709 |
| 26.096 | 3320.37971 | 1929 | 2411 | 1721 |
| 26.129 | 3313.07482 | 1839 | 2351 | 1706 |
| 26.162 | 3305.77905 | 1887 | 2332 | 1672 |
| 26.195 | 3298.49276 | 1929 | 2316 | 1667 |
| 26.228 | 3291.2163  | 1890 | 2363 | 1635 |
| 26.261 | 3283.95002 | 1844 | 2390 | 1610 |
| 26.294 | 3276.69426 | 1845 | 2424 | 1638 |
| 26.327 | 3269.44936 | 1860 | 2417 | 1642 |
| 26.36  | 3262.21564 | 1841 | 2387 | 1648 |
| 26.393 | 3254.99344 | 1835 | 2306 | 1642 |
| 26.426 | 3247.78308 | 1800 | 2355 | 1589 |
| 26.459 | 3240.58486 | 1807 | 2400 | 1618 |
| 26.492 | 3233.3991  | 1816 | 2339 | 1637 |
| 26.525 | 3226.22609 | 1789 | 2259 | 1626 |
| 26.558 | 3219.06615 | 1822 | 2233 | 1638 |
| 26.591 | 3211.91956 | 1850 | 2271 | 1604 |
| 26.624 | 3204.78661 | 1814 | 2303 | 1635 |
| 26.657 | 3197.66759 | 1792 | 2274 | 1648 |



|        |            |      |      |      |
|--------|------------|------|------|------|
| 26.69  | 3190.56276 | 1792 | 2256 | 1556 |
| 26.723 | 3183.47241 | 1772 | 2280 | 1568 |
| 26.756 | 3176.39679 | 1763 | 2245 | 1631 |
| 26.789 | 3169.33618 | 1803 | 2217 | 1628 |
| 26.822 | 3162.29083 | 1794 | 2223 | 1619 |
| 26.855 | 3155.26098 | 1717 | 2269 | 1616 |
| 26.888 | 3148.2469  | 1745 | 2246 | 1588 |
| 26.921 | 3141.24882 | 1778 | 2186 | 1532 |
| 26.954 | 3134.26698 | 1727 | 2159 | 1535 |
| 26.987 | 3127.3016  | 1677 | 2144 | 1541 |
| 27.02  | 3120.35293 | 1692 | 2112 | 1559 |
| 27.053 | 3113.42118 | 1739 | 2109 | 1629 |
| 27.086 | 3106.50657 | 1708 | 2134 | 1604 |
| 27.119 | 3099.60931 | 1725 | 2134 | 1545 |
| 27.152 | 3092.72962 | 1687 | 2073 | 1522 |
| 27.185 | 3085.86769 | 1680 | 2011 | 1488 |
| 27.218 | 3079.02373 | 1703 | 2044 | 1508 |
| 27.251 | 3072.19794 | 1726 | 2102 | 1544 |
| 27.284 | 3065.39049 | 1695 | 2056 | 1533 |
| 27.317 | 3058.60159 | 1682 | 1991 | 1551 |
| 27.35  | 3051.83141 | 1698 | 2009 | 1543 |
| 27.383 | 3045.08012 | 1657 | 1980 | 1497 |
| 27.416 | 3038.34791 | 1601 | 2039 | 1581 |
| 27.449 | 3031.63494 | 1686 | 1967 | 1572 |
| 27.482 | 3024.94137 | 1697 | 1901 | 1457 |
| 27.515 | 3018.26737 | 1644 | 1975 | 1490 |
| 27.548 | 3011.6131  | 1598 | 1998 | 1533 |
| 27.581 | 3004.97869 | 1561 | 1992 | 1424 |
| 27.614 | 2998.36431 | 1593 | 1907 | 1531 |
| 27.647 | 2991.77009 | 1573 | 1885 | 1438 |
| 27.68  | 2985.19618 | 1578 | 1903 | 1448 |
| 27.713 | 2978.6427  | 1593 | 1936 | 1422 |
| 27.746 | 2972.1098  | 1579 | 1931 | 1414 |
| 27.779 | 2965.5976  | 1661 | 1989 | 1343 |
| 27.812 | 2959.10622 | 1571 | 1925 | 1405 |
| 27.845 | 2952.63579 | 1561 | 1923 | 1418 |
| 27.878 | 2946.18642 | 1551 | 1884 | 1438 |
| 27.911 | 2939.75821 | 1559 | 1889 | 1472 |
| 27.944 | 2933.35129 | 1544 | 1858 | 1389 |
| 27.977 | 2926.96575 | 1573 | 1901 | 1378 |
| 28.01  | 2920.6017  | 1605 | 1803 | 1342 |

|        |            |      |      |      |
|--------|------------|------|------|------|
| 28.043 | 2914.25923 | 1532 | 1823 | 1334 |
| 28.076 | 2907.93844 | 1493 | 1822 | 1384 |
| 28.109 | 2901.63941 | 1442 | 1822 | 1423 |
| 28.142 | 2895.36224 | 1546 | 1784 | 1361 |
| 28.175 | 2889.10701 | 1561 | 1753 | 1334 |
| 28.208 | 2882.8738  | 1391 | 1771 | 1268 |
| 28.241 | 2876.66268 | 1493 | 1709 | 1305 |
| 28.274 | 2870.47372 | 1533 | 1742 | 1330 |
| 28.307 | 2864.307   | 1502 | 1774 | 1274 |
| 28.34  | 2858.16259 | 1552 | 1759 | 1313 |
| 28.373 | 2852.04054 | 1468 | 1723 | 1318 |
| 28.406 | 2845.94091 | 1481 | 1765 | 1283 |
| 28.439 | 2839.86377 | 1417 | 1733 | 1265 |
| 28.472 | 2833.80916 | 1473 | 1733 | 1285 |
| 28.505 | 2827.77714 | 1444 | 1715 | 1345 |
| 28.538 | 2821.76775 | 1482 | 1751 | 1325 |
| 28.571 | 2815.78103 | 1452 | 1799 | 1229 |
| 28.604 | 2809.81704 | 1437 | 1690 | 1309 |
| 28.637 | 2803.87579 | 1459 | 1652 | 1256 |
| 28.67  | 2797.95734 | 1407 | 1634 | 1245 |
| 28.703 | 2792.06172 | 1388 | 1688 | 1310 |
| 28.736 | 2786.18894 | 1441 | 1653 | 1279 |
| 28.769 | 2780.33905 | 1462 | 1621 | 1306 |
| 28.802 | 2774.51206 | 1407 | 1606 | 1292 |
| 28.835 | 2768.70799 | 1418 | 1659 | 1243 |
| 28.868 | 2762.92686 | 1425 | 1628 | 1237 |
| 28.901 | 2757.16869 | 1398 | 1605 | 1242 |
| 28.934 | 2751.43349 | 1391 | 1603 | 1255 |
| 28.967 | 2745.72128 | 1374 | 1581 | 1210 |
| 29     | 2740.03205 | 1366 | 1551 | 1199 |
| 29.033 | 2734.36581 | 1327 | 1616 | 1188 |
| 29.066 | 2728.72258 | 1347 | 1619 | 1192 |
| 29.099 | 2723.10233 | 1377 | 1579 | 1197 |
| 29.132 | 2717.50509 | 1363 | 1594 | 1212 |
| 29.165 | 2711.93083 | 1343 | 1552 | 1201 |
| 29.198 | 2706.37956 | 1333 | 1543 | 1181 |
| 29.231 | 2700.85126 | 1334 | 1643 | 1173 |
| 29.264 | 2695.34592 | 1306 | 1661 | 1199 |
| 29.297 | 2689.86353 | 1299 | 1551 | 1225 |
| 29.33  | 2684.40408 | 1320 | 1492 | 1177 |
| 29.363 | 2678.96753 | 1285 | 1512 | 1144 |

|        |            |      |      |      |
|--------|------------|------|------|------|
| 29.396 | 2673.55389 | 1240 | 1528 | 1150 |
| 29.429 | 2668.16311 | 1272 | 1515 | 1169 |
| 29.462 | 2662.79519 | 1309 | 1547 | 1088 |
| 29.495 | 2657.45008 | 1286 | 1551 | 1089 |
| 29.528 | 2652.12777 | 1247 | 1520 | 1155 |
| 29.561 | 2646.82822 | 1255 | 1550 | 1130 |
| 29.594 | 2641.5514  | 1229 | 1500 | 1131 |
| 29.627 | 2636.29727 | 1261 | 1479 | 1197 |
| 29.66  | 2631.06581 | 1296 | 1449 | 1172 |
| 29.693 | 2625.85696 | 1288 | 1503 | 1133 |
| 29.726 | 2620.67071 | 1244 | 1492 | 1095 |
| 29.759 | 2615.50699 | 1231 | 1515 | 1069 |
| 29.792 | 2610.36577 | 1249 | 1498 | 1032 |
| 29.825 | 2605.24701 | 1270 | 1471 | 1067 |
| 29.858 | 2600.15065 | 1250 | 1371 | 1075 |
| 29.891 | 2595.07666 | 1244 | 1426 | 1085 |
| 29.924 | 2590.02497 | 1290 | 1458 | 1110 |
| 29.957 | 2584.44413 | 1269 | 1388 | 1091 |
| 29.99  | 2579.29413 | 1227 | 1440 | 1091 |
| 30.023 | 2573.82943 | 1226 | 1433 | 1154 |
| 30.056 | 2568.56944 | 1231 | 1469 | 1082 |
| 30.089 | 2563.04594 | 1190 | 1432 | 1029 |
| 30.122 | 2557.77329 | 1216 | 1401 | 1100 |
| 30.155 | 2552.72934 | 1209 | 1434 | 1015 |
| 30.188 | 2547.32002 | 1238 | 1434 | 1068 |
| 30.221 | 2542.08756 | 1163 | 1371 | 1090 |
| 30.254 | 2536.8918  | 1149 | 1418 | 1074 |
| 30.287 | 2531.939   | 1188 | 1406 | 1045 |
| 30.32  | 2526.84955 | 1145 | 1340 | 1026 |
| 30.353 | 2522.03195 | 1150 | 1393 | 1067 |
| 30.386 | 2517.29471 | 1149 | 1374 | 1088 |
| 30.419 | 2512.04376 | 1140 | 1303 | 1113 |
| 30.452 | 2506.97839 | 1142 | 1337 | 1073 |
| 30.485 | 2502.03225 | 1124 | 1350 | 1114 |
| 30.518 | 2497.0402  | 1178 | 1319 | 1040 |
| 30.551 | 2492.15294 | 1203 | 1410 | 1003 |
| 30.584 | 2487.93109 | 1167 | 1344 | 1041 |
| 30.617 | 2483.09823 | 1177 | 1362 | 1005 |
| 30.65  | 2478.48102 | 1130 | 1392 | 1063 |
| 30.683 | 2473.62877 | 1101 | 1316 | 1072 |
| 30.716 | 2468.87527 | 1143 | 1269 | 997  |

|        |            |      |      |      |
|--------|------------|------|------|------|
| 30.749 | 2464.2619  | 1089 | 1324 | 1013 |
| 30.782 | 2459.57409 | 1137 | 1311 | 999  |
| 30.815 | 2455.18004 | 1106 | 1328 | 1042 |
| 30.848 | 2450.66537 | 1121 | 1269 | 1036 |
| 30.881 | 2446.21496 | 1059 | 1250 | 958  |
| 30.914 | 2441.60726 | 1086 | 1296 | 1012 |
| 30.947 | 2436.75205 | 1064 | 1318 | 1040 |
| 30.98  | 2432.21887 | 1094 | 1238 | 1054 |
| 31.013 | 2427.88847 | 1123 | 1286 | 1065 |
| 31.046 | 2423.64329 | 1100 | 1340 | 1030 |
| 31.079 | 2419.46838 | 1121 | 1314 | 1047 |
| 31.112 | 2415.18893 | 1112 | 1365 | 1022 |
| 31.145 | 2410.8396  | 1108 | 1354 | 1038 |
| 31.178 | 2406.23031 | 1137 | 1345 | 1026 |
| 31.211 | 2401.6016  | 1160 | 1360 | 1002 |
| 31.244 | 2397.18925 | 1147 | 1372 | 1045 |
| 31.277 | 2393.23199 | 1168 | 1344 | 1053 |
| 31.31  | 2389.11681 | 1223 | 1325 | 1008 |
| 31.343 | 2384.5679  | 1223 | 1290 | 1034 |
| 31.376 | 2380.06417 | 1158 | 1271 | 1060 |
| 31.409 | 2376.3147  | 1185 | 1330 | 1030 |
| 31.442 | 2372.47674 | 1178 | 1352 | 1018 |
| 31.475 | 2368.59173 | 1152 | 1348 | 1030 |
| 31.508 | 2365.00127 | 1101 | 1315 | 991  |
| 31.541 | 2361.2445  | 1068 | 1294 | 971  |
| 31.574 | 2357.28361 | 1056 | 1311 | 957  |
| 31.607 | 2353.28852 | 1072 | 1297 | 990  |
| 31.64  | 2349.45227 | 1076 | 1262 | 989  |
| 31.673 | 2345.5383  | 1039 | 1245 | 957  |
| 31.706 | 2341.69761 | 1015 | 1220 | 981  |
| 31.739 | 2337.66946 | 1039 | 1194 | 987  |
| 31.772 | 2333.41251 | 1055 | 1219 | 986  |
| 31.805 | 2329.4911  | 1041 | 1239 | 951  |
| 31.838 | 2325.94024 | 1018 | 1245 | 915  |
| 31.871 | 2322.12717 | 996  | 1273 | 918  |
| 31.904 | 2318.08173 | 1010 | 1248 | 921  |
| 31.937 | 2314.30878 | 1051 | 1234 | 945  |
| 31.97  | 2310.27713 | 1055 | 1274 | 945  |
| 32.003 | 2306.31972 | 1034 | 1268 | 944  |
| 32.036 | 2302.60848 | 1033 | 1248 | 924  |
| 32.069 | 2298.7029  | 1026 | 1229 | 917  |

|        |            |      |      |     |
|--------|------------|------|------|-----|
| 32.102 | 2294.73397 | 1017 | 1187 | 951 |
| 32.135 | 2291.20806 | 1012 | 1182 | 943 |
| 32.168 | 2287.6094  | 1035 | 1200 | 935 |
| 32.201 | 2283.76697 | 1016 | 1165 | 934 |
| 32.234 | 2280.46836 | 978  | 1134 | 961 |
| 32.267 | 2276.79236 | 995  | 1210 | 937 |
| 32.3   | 2272.96329 | 1005 | 1183 | 929 |
| 32.333 | 2269.30665 | 986  | 1143 | 933 |
| 32.366 | 2265.65432 | 1053 | 1144 | 917 |
| 32.399 | 2262.23014 | 994  | 1215 | 931 |
| 32.432 | 2258.66087 | 971  | 1198 | 921 |
| 32.465 | 2254.92491 | 998  | 1178 | 938 |
| 32.498 | 2251.19135 | 989  | 1173 | 949 |
| 32.531 | 2248.35527 | 996  | 1127 | 913 |
| 32.564 | 2245.34149 | 962  | 1184 | 893 |
| 32.597 | 2241.78865 | 987  | 1163 | 879 |
| 32.63  | 2238.36068 | 978  | 1152 | 898 |
| 32.663 | 2235.2759  | 993  | 1178 | 898 |
| 32.696 | 2232.31438 | 956  | 1167 | 891 |
| 32.729 | 2228.87118 | 1018 | 1159 | 904 |
| 32.762 | 2225.56648 | 946  | 1104 | 923 |
| 32.795 | 2222.15369 | 988  | 1155 | 915 |
| 32.828 | 2218.78751 | 985  | 1158 | 922 |
| 32.861 | 2215.52126 | 987  | 1242 | 849 |
| 32.894 | 2212.43635 | 948  | 1163 | 871 |
| 32.927 | 2209.09541 | 1002 | 1166 | 873 |
| 32.96  | 2205.59386 | 996  | 1130 | 873 |
| 32.993 | 2202.45447 | 892  | 1125 | 876 |
| 33.026 | 2199.22834 | 948  | 1147 | 834 |
| 33.059 | 2196.48533 | 965  | 1138 | 880 |
| 33.092 | 2193.35976 | 924  | 1161 | 862 |
| 33.125 | 2190.34914 | 935  | 1070 | 828 |
| 33.158 | 2187.24223 | 917  | 1093 | 865 |
| 33.191 | 2184.24981 | 908  | 1172 | 886 |
| 33.224 | 2181.47209 | 913  | 1102 | 832 |
| 33.257 | 2178.69394 | 909  | 1103 | 866 |
| 33.29  | 2175.97754 | 925  | 1161 | 867 |
| 33.323 | 2173.13895 | 955  | 1077 | 857 |
| 33.356 | 2170.52526 | 936  | 1066 | 895 |
| 33.389 | 2167.75385 | 931  | 1056 | 845 |
| 33.422 | 2165.23896 | 949  | 1085 | 868 |

|        |            |     |      |     |
|--------|------------|-----|------|-----|
| 33.455 | 2162.38407 | 924 | 1085 | 867 |
| 33.488 | 2159.48624 | 979 | 1168 | 880 |
| 33.521 | 2156.61075 | 927 | 1153 | 875 |
| 33.554 | 2153.88927 | 927 | 1128 | 823 |
| 33.587 | 2151.38598 | 897 | 1139 | 872 |
| 33.62  | 2148.57137 | 893 | 1157 | 854 |
| 33.653 | 2146.21603 | 881 | 1144 | 830 |
| 33.686 | 2143.39922 | 944 | 1074 | 830 |
| 33.719 | 2140.65208 | 958 | 1114 | 840 |
| 33.752 | 2138.02627 | 946 | 1102 | 881 |
| 33.785 | 2135.61575 | 936 | 1085 | 841 |
| 33.818 | 2133.22677 | 937 | 1102 | 873 |
| 33.851 | 2130.81225 | 936 | 1151 | 899 |
| 33.884 | 2128.31783 | 926 | 1089 | 857 |
| 33.917 | 2125.88435 | 884 | 1120 | 850 |
| 33.95  | 2123.38845 | 903 | 1105 | 843 |
| 33.983 | 2120.87698 | 923 | 1092 | 863 |
| 34.016 | 2118.6922  | 938 | 1092 | 860 |
| 34.049 | 2116.21551 | 895 | 1159 | 864 |
| 34.082 | 2113.82184 | 890 | 1165 | 870 |
| 34.115 | 2111.53574 | 882 | 1158 | 841 |
| 34.148 | 2109.1449  | 880 | 1129 | 818 |
| 34.181 | 2106.88319 | 852 | 1111 | 819 |
| 34.214 | 2104.8803  | 880 | 1098 | 856 |
| 34.247 | 2102.89825 | 935 | 1090 | 884 |
| 34.28  | 2100.7293  | 917 | 1092 | 851 |
| 34.313 | 2098.5034  | 862 | 1101 | 829 |
| 34.346 | 2096.31496 | 861 | 1121 | 863 |
| 34.379 | 2094.27164 | 869 | 1094 | 862 |
| 34.412 | 2092.29571 | 888 | 1066 | 842 |
| 34.445 | 2090.6395  | 886 | 1075 | 844 |
| 34.478 | 2088.81142 | 877 | 1078 | 833 |
| 34.511 | 2086.8027  | 913 | 1100 | 793 |
| 34.544 | 2085.302   | 922 | 1152 | 782 |
| 34.577 | 2083.5447  | 927 | 1144 | 833 |
| 34.61  | 2081.65435 | 906 | 1101 | 843 |
| 34.643 | 2079.68917 | 875 | 1090 | 794 |
| 34.676 | 2077.49579 | 886 | 1103 | 772 |
| 34.709 | 2075.28269 | 898 | 1137 | 809 |
| 34.742 | 2073.50444 | 900 | 1100 | 809 |
| 34.775 | 2071.6452  | 868 | 1081 | 760 |

|        |            |     |      |     |
|--------|------------|-----|------|-----|
| 34.808 | 2069.6776  | 831 | 1057 | 785 |
| 34.841 | 2067.71835 | 827 | 1097 | 813 |
| 34.874 | 2065.62498 | 840 | 1129 | 839 |
| 34.907 | 2063.37103 | 868 | 1079 | 848 |
| 34.94  | 2061.3797  | 875 | 1036 | 820 |
| 34.973 | 2058.85276 | 888 | 1078 | 826 |
| 35.006 | 2056.51796 | 855 | 1093 | 805 |
| 35.039 | 2054.68187 | 846 | 1058 | 778 |
| 35.072 | 2052.5655  | 875 | 1057 | 767 |
| 35.105 | 2050.31387 | 880 | 1094 | 803 |
| 35.138 | 2047.8015  | 862 | 1119 | 806 |
| 35.171 | 2046.03537 | 852 | 1117 | 795 |
| 35.204 | 2044.34634 | 861 | 1115 | 866 |
| 35.237 | 2042.3193  | 829 | 1062 | 812 |
| 35.27  | 2040.44516 | 840 | 1049 | 836 |
| 35.303 | 2038.64544 | 877 | 1104 | 846 |
| 35.336 | 2036.84105 | 857 | 1176 | 773 |
| 35.369 | 2034.72571 | 883 | 1087 | 781 |
| 35.402 | 2032.69682 | 848 | 1030 | 846 |
| 35.435 | 2030.82023 | 899 | 1053 | 801 |
| 35.468 | 2029.05758 | 864 | 1015 | 816 |
| 35.501 | 2027.25205 | 833 | 1054 | 774 |
| 35.534 | 2025.73321 | 865 | 1000 | 794 |
| 35.567 | 2024.15626 | 885 | 1091 | 864 |
| 35.6   | 2022.50923 | 838 | 1064 | 855 |
| 35.633 | 2020.84356 | 889 | 1077 | 752 |
| 35.666 | 2018.97408 | 895 | 1094 | 884 |
| 35.699 | 2017.31548 | 804 | 1124 | 860 |
| 35.732 | 2015.89007 | 863 | 1136 | 859 |
| 35.765 | 2014.49753 | 801 | 1151 | 859 |
| 35.798 | 2013.01357 | 837 | 1190 | 881 |
| 35.831 | 2011.66594 | 861 | 1152 | 857 |
| 35.864 | 2010.2322  | 924 | 1128 | 880 |
| 35.897 | 2008.76387 | 944 | 1175 | 888 |
| 35.93  | 2007.08051 | 887 | 1204 | 808 |
| 35.963 | 2005.35965 | 886 | 1135 | 829 |
| 35.996 | 2003.49197 | 948 | 1161 | 859 |
| 36.029 | 2001.97658 | 913 | 1136 | 875 |
| 36.062 | 2000.35304 | 923 | 1203 | 858 |
| 36.095 | 1998.80801 | 915 | 1216 | 869 |
| 36.128 | 1997.09268 | 875 | 1225 | 833 |

|        |            |      |      |      |
|--------|------------|------|------|------|
| 36.161 | 1995.69034 | 897  | 1176 | 817  |
| 36.194 | 1994.36551 | 896  | 1137 | 883  |
| 36.227 | 1993.06789 | 901  | 1145 | 892  |
| 36.26  | 1991.76224 | 912  | 1158 | 882  |
| 36.293 | 1990.69887 | 936  | 1196 | 862  |
| 36.326 | 1989.4078  | 942  | 1228 | 836  |
| 36.359 | 1988.47721 | 878  | 1258 | 863  |
| 36.392 | 1987.52879 | 907  | 1256 | 846  |
| 36.425 | 1986.57396 | 958  | 1280 | 880  |
| 36.458 | 1985.43789 | 978  | 1240 | 933  |
| 36.491 | 1984.58894 | 984  | 1249 | 910  |
| 36.524 | 1983.89501 | 977  | 1269 | 928  |
| 36.557 | 1983.03404 | 953  | 1266 | 918  |
| 36.59  | 1982.36335 | 920  | 1295 | 931  |
| 36.623 | 1981.74279 | 925  | 1282 | 949  |
| 36.656 | 1981.18726 | 973  | 1208 | 977  |
| 36.689 | 1980.25807 | 1040 | 1208 | 945  |
| 36.722 | 1979.13845 | 1024 | 1295 | 958  |
| 36.755 | 1978.09698 | 1014 | 1361 | 988  |
| 36.788 | 1976.90624 | 1051 | 1336 | 994  |
| 36.821 | 1975.56826 | 1067 | 1366 | 995  |
| 36.854 | 1974.08159 | 1041 | 1430 | 996  |
| 36.887 | 1972.47106 | 1090 | 1402 | 1012 |
| 36.92  | 1970.7808  | 1129 | 1395 | 1040 |
| 36.953 | 1969.51175 | 1138 | 1433 | 1039 |
| 36.986 | 1968.06793 | 1177 | 1483 | 1051 |
| 37.019 | 1966.76765 | 1180 | 1521 | 1088 |
| 37.052 | 1965.38326 | 1172 | 1514 | 1112 |
| 37.085 | 1963.73918 | 1191 | 1544 | 1163 |
| 37.118 | 1962.14376 | 1221 | 1582 | 1195 |
| 37.151 | 1960.45454 | 1241 | 1612 | 1177 |
| 37.184 | 1958.91272 | 1243 | 1661 | 1205 |
| 37.217 | 1957.55304 | 1269 | 1693 | 1255 |
| 37.25  | 1956.09838 | 1319 | 1737 | 1304 |
| 37.283 | 1954.54512 | 1347 | 1793 | 1373 |
| 37.316 | 1953.43657 | 1388 | 1878 | 1421 |
| 37.349 | 1952.02605 | 1462 | 1956 | 1497 |
| 37.382 | 1950.50594 | 1525 | 2050 | 1538 |
| 37.415 | 1949.41321 | 1628 | 2167 | 1586 |
| 37.448 | 1948.38728 | 1702 | 2245 | 1724 |
| 37.481 | 1947.06316 | 1795 | 2293 | 1804 |



|        |            |      |      |      |
|--------|------------|------|------|------|
| 37.514 | 1946.11026 | 1832 | 2568 | 1925 |
| 37.547 | 1944.64903 | 1950 | 2771 | 2040 |
| 37.58  | 1943.74033 | 2125 | 2918 | 2162 |
| 37.613 | 1942.95521 | 2308 | 3055 | 2341 |
| 37.646 | 1941.48938 | 2446 | 3285 | 2549 |
| 37.679 | 1940.26162 | 2643 | 3537 | 2728 |
| 37.712 | 1939.37017 | 2896 | 3831 | 2945 |
| 37.745 | 1938.16833 | 3152 | 4321 | 3184 |
| 37.778 | 1936.91843 | 3479 | 4692 | 3445 |
| 37.811 | 1935.58083 | 3938 | 5080 | 3679 |
| 37.844 | 1934.36219 | 4344 | 5557 | 3718 |
| 37.877 | 1932.82182 | 4719 | 5897 | 3899 |
| 37.91  | 1931.2413  | 5299 | 6514 | 4200 |
| 37.943 | 1929.58528 | 5978 | 6859 | 4374 |
| 37.976 | 1927.94483 | 6556 | 7336 | 4570 |
| 38.009 | 1926.29683 | 6916 | 7568 | 4593 |
| 38.042 | 1924.62094 | 7509 | 7796 | 4625 |
| 38.075 | 1922.71361 | 7686 | 7622 | 4562 |
| 38.108 | 1920.88918 | 7576 | 7329 | 4338 |
| 38.141 | 1919.20886 | 6957 | 6733 | 4166 |
| 38.174 | 1917.76302 | 6381 | 6323 | 3728 |
| 38.207 | 1916.31565 | 5808 | 5629 | 3454 |
| 38.24  | 1914.81964 | 5200 | 5138 | 3044 |
| 38.273 | 1913.49406 | 4625 | 4611 | 2842 |
| 38.306 | 1912.22653 | 4121 | 4168 | 2600 |
| 38.339 | 1911.05143 | 3553 | 3892 | 2625 |
| 38.372 | 1909.62201 | 3129 | 3596 | 2209 |
| 38.405 | 1908.05794 | 3089 | 3324 | 2081 |
| 38.438 | 1906.54965 | 2711 | 3093 | 2009 |
| 38.471 | 1905.07993 | 2569 | 2926 | 1917 |
| 38.504 | 1903.81393 | 2365 | 2810 | 1786 |
| 38.537 | 1902.50854 | 2171 | 2596 | 1694 |
| 38.57  | 1901.32089 | 2023 | 2456 | 1660 |
| 38.603 | 1899.99796 | 1970 | 2333 | 1596 |
| 38.636 | 1898.87508 | 1817 | 2201 | 1508 |
| 38.669 | 1897.88115 | 1778 | 2102 | 1421 |
| 38.702 | 1896.80315 | 1694 | 2087 | 1433 |
| 38.735 | 1895.49945 | 1651 | 1972 | 1376 |
| 38.768 | 1894.3051  | 1558 | 1892 | 1321 |
| 38.801 | 1893.15575 | 1499 | 1833 | 1305 |
| 38.834 | 1891.91772 | 1500 | 1739 | 1260 |

|        |            |      |      |      |
|--------|------------|------|------|------|
| 38.867 | 1890.54058 | 1353 | 1759 | 1205 |
| 38.9   | 1889.17484 | 1395 | 1673 | 1184 |
| 38.933 | 1888.01788 | 1363 | 1617 | 1204 |
| 38.966 | 1886.89943 | 1332 | 1683 | 1122 |
| 38.999 | 1885.89333 | 1294 | 1558 | 1128 |
| 39.032 | 1884.68637 | 1208 | 1574 | 1101 |
| 39.065 | 1883.59915 | 1194 | 1549 | 1135 |
| 39.098 | 1882.3065  | 1217 | 1467 | 1087 |
| 39.131 | 1881.09119 | 1181 | 1527 | 1047 |
| 39.164 | 1880.03813 | 1173 | 1507 | 1049 |
| 39.197 | 1878.65538 | 1139 | 1443 | 1033 |
| 39.23  | 1877.31479 | 1172 | 1428 | 1028 |
| 39.263 | 1875.91818 | 1130 | 1448 | 1058 |
| 39.296 | 1874.56378 | 1118 | 1417 | 1029 |
| 39.329 | 1873.32418 | 1093 | 1413 | 964  |
| 39.362 | 1872.14706 | 1043 | 1406 | 989  |
| 39.395 | 1871.10819 | 1040 | 1375 | 991  |
| 39.428 | 1870.16961 | 1038 | 1369 | 955  |
| 39.461 | 1869.54059 | 1063 | 1334 | 940  |
| 39.494 | 1868.53241 | 1054 | 1324 | 966  |
| 39.527 | 1867.5304  | 1040 | 1333 | 1003 |
| 39.56  | 1866.28627 | 1048 | 1322 | 969  |
| 39.593 | 1865.32994 | 1059 | 1293 | 904  |
| 39.626 | 1863.91666 | 1053 | 1274 | 911  |
| 39.659 | 1862.44551 | 1010 | 1271 | 911  |
| 39.692 | 1861.24092 | 978  | 1271 | 909  |
| 39.725 | 1859.77441 | 979  | 1282 | 921  |
| 39.758 | 1858.50153 | 975  | 1275 | 922  |
| 39.791 | 1857.10745 | 990  | 1224 | 960  |
| 39.824 | 1855.49707 | 1013 | 1187 | 928  |
| 39.857 | 1853.923   | 1000 | 1206 | 898  |
| 39.89  | 1852.46967 | 1010 | 1209 | 932  |
| 39.923 | 1851.1216  | 992  | 1207 | 902  |
| 39.956 | 1849.6485  | 977  | 1184 | 881  |
| 39.989 | 1848.31153 | 932  | 1201 | 925  |
| 40.022 | 1846.65028 | 938  | 1224 | 915  |
| 40.055 | 1845.34094 | 964  | 1241 | 894  |
| 40.088 | 1844.09343 | 975  | 1236 | 862  |
| 40.121 | 1842.72552 | 997  | 1191 | 911  |
| 40.154 | 1841.06369 | 957  | 1178 | 887  |
| 40.187 | 1839.59656 | 961  | 1182 | 892  |

|        |            |      |      |     |
|--------|------------|------|------|-----|
| 40.22  | 1838.15676 | 954  | 1189 | 883 |
| 40.253 | 1836.62522 | 922  | 1172 | 850 |
| 40.286 | 1835.05896 | 926  | 1144 | 865 |
| 40.319 | 1833.63111 | 929  | 1166 | 867 |
| 40.352 | 1832.39647 | 954  | 1187 | 864 |
| 40.385 | 1830.92895 | 936  | 1136 | 868 |
| 40.418 | 1829.37521 | 919  | 1207 | 850 |
| 40.451 | 1827.97254 | 925  | 1219 | 857 |
| 40.484 | 1826.58661 | 948  | 1235 | 859 |
| 40.517 | 1825.38616 | 921  | 1161 | 836 |
| 40.55  | 1824.33281 | 933  | 1183 | 838 |
| 40.583 | 1823.33471 | 897  | 1151 | 869 |
| 40.616 | 1822.04883 | 932  | 1164 | 848 |
| 40.649 | 1820.67776 | 968  | 1169 | 915 |
| 40.682 | 1819.41772 | 934  | 1183 | 897 |
| 40.715 | 1817.76075 | 966  | 1159 | 880 |
| 40.748 | 1816.16449 | 957  | 1271 | 873 |
| 40.781 | 1814.66321 | 981  | 1204 | 902 |
| 40.814 | 1813.19498 | 880  | 1211 | 895 |
| 40.847 | 1811.86374 | 883  | 1196 | 886 |
| 40.88  | 1810.51492 | 939  | 1165 | 894 |
| 40.913 | 1809.23627 | 974  | 1131 | 868 |
| 40.946 | 1808.07898 | 923  | 1173 | 808 |
| 40.979 | 1806.9681  | 936  | 1202 | 855 |
| 41.012 | 1805.55482 | 946  | 1148 | 894 |
| 41.045 | 1803.89983 | 890  | 1140 | 889 |
| 41.078 | 1802.45559 | 941  | 1196 | 891 |
| 41.111 | 1801.3828  | 897  | 1208 | 886 |
| 41.144 | 1799.93396 | 989  | 1160 | 891 |
| 41.177 | 1798.40125 | 903  | 1147 | 877 |
| 41.21  | 1797.09678 | 945  | 1142 | 910 |
| 41.243 | 1795.5719  | 936  | 1146 | 882 |
| 41.276 | 1793.97124 | 1001 | 1190 | 861 |
| 41.309 | 1792.57821 | 985  | 1167 | 861 |
| 41.342 | 1790.92543 | 942  | 1152 | 843 |
| 41.375 | 1789.61274 | 907  | 1147 | 865 |
| 41.408 | 1788.28996 | 917  | 1203 | 886 |
| 41.441 | 1786.99492 | 983  | 1146 | 890 |
| 41.474 | 1785.65066 | 924  | 1158 | 901 |
| 41.507 | 1783.7594  | 934  | 1125 | 826 |
| 41.54  | 1782.28827 | 941  | 1176 | 889 |

|        |            |      |      |      |
|--------|------------|------|------|------|
| 41.573 | 1780.76694 | 954  | 1150 | 877  |
| 41.606 | 1779.36852 | 956  | 1163 | 828  |
| 41.639 | 1778.0323  | 965  | 1167 | 870  |
| 41.672 | 1776.69968 | 983  | 1170 | 893  |
| 41.705 | 1775.2066  | 979  | 1187 | 890  |
| 41.738 | 1773.61325 | 979  | 1201 | 903  |
| 41.771 | 1771.94141 | 935  | 1150 | 943  |
| 41.804 | 1770.41788 | 940  | 1168 | 944  |
| 41.837 | 1769.04743 | 981  | 1199 | 925  |
| 41.87  | 1767.76457 | 990  | 1173 | 888  |
| 41.903 | 1766.39984 | 1006 | 1186 | 905  |
| 41.936 | 1764.91271 | 991  | 1170 | 914  |
| 41.969 | 1763.2708  | 1010 | 1174 | 957  |
| 42.002 | 1761.618   | 1011 | 1165 | 936  |
| 42.035 | 1759.96602 | 955  | 1166 | 900  |
| 42.068 | 1758.38627 | 990  | 1162 | 939  |
| 42.101 | 1756.75116 | 1016 | 1114 | 925  |
| 42.134 | 1754.98746 | 1002 | 1140 | 900  |
| 42.167 | 1753.01345 | 984  | 1164 | 920  |
| 42.2   | 1750.90756 | 992  | 1178 | 960  |
| 42.233 | 1748.8913  | 1006 | 1193 | 950  |
| 42.266 | 1746.40243 | 999  | 1192 | 902  |
| 42.299 | 1743.79792 | 990  | 1220 | 924  |
| 42.332 | 1740.97219 | 984  | 1241 | 960  |
| 42.365 | 1737.81266 | 993  | 1260 | 960  |
| 42.398 | 1734.48031 | 1001 | 1244 | 954  |
| 42.431 | 1730.85255 | 1001 | 1199 | 951  |
| 42.464 | 1726.98954 | 1011 | 1186 | 924  |
| 42.497 | 1723.08306 | 1055 | 1216 | 904  |
| 42.53  | 1719.10237 | 1032 | 1244 | 925  |
| 42.563 | 1715.25534 | 1006 | 1223 | 946  |
| 42.596 | 1711.7377  | 1013 | 1201 | 965  |
| 42.629 | 1708.10633 | 1072 | 1218 | 934  |
| 42.662 | 1704.78188 | 1086 | 1278 | 973  |
| 42.695 | 1701.59879 | 1078 | 1250 | 1012 |
| 42.728 | 1698.67332 | 1074 | 1220 | 1011 |
| 42.761 | 1695.68873 | 1039 | 1204 | 999  |
| 42.794 | 1692.72587 | 1071 | 1268 | 992  |
| 42.827 | 1689.91539 | 1094 | 1249 | 993  |
| 42.86  | 1687.28596 | 1150 | 1265 | 1002 |
| 42.893 | 1684.81264 | 1164 | 1282 | 1014 |

|        |            |      |      |      |
|--------|------------|------|------|------|
| 42.926 | 1682.34994 | 1114 | 1352 | 1008 |
| 42.959 | 1679.88785 | 1142 | 1347 | 989  |
| 42.992 | 1677.36449 | 1175 | 1293 | 989  |
| 43.025 | 1674.62939 | 1200 | 1308 | 1027 |
| 43.058 | 1671.87405 | 1172 | 1361 | 1085 |
| 43.091 | 1669.23147 | 1195 | 1410 | 1047 |
| 43.124 | 1666.78787 | 1177 | 1344 | 1068 |
| 43.157 | 1664.14369 | 1222 | 1391 | 1128 |
| 43.19  | 1661.81952 | 1186 | 1418 | 1103 |
| 43.223 | 1659.05442 | 1190 | 1429 | 1146 |
| 43.256 | 1656.30618 | 1267 | 1486 | 1132 |
| 43.289 | 1653.68226 | 1264 | 1441 | 1108 |
| 43.322 | 1651.02703 | 1307 | 1510 | 1163 |
| 43.355 | 1648.26536 | 1340 | 1508 | 1190 |
| 43.388 | 1645.9286  | 1274 | 1499 | 1189 |
| 43.421 | 1643.44172 | 1348 | 1552 | 1190 |
| 43.454 | 1640.85886 | 1385 | 1644 | 1164 |
| 43.487 | 1638.44883 | 1265 | 1600 | 1285 |
| 43.52  | 1635.95109 | 1384 | 1623 | 1304 |
| 43.553 | 1633.66064 | 1475 | 1655 | 1242 |
| 43.586 | 1631.14766 | 1509 | 1700 | 1278 |
| 43.619 | 1628.36042 | 1531 | 1664 | 1383 |
| 43.652 | 1625.60159 | 1510 | 1767 | 1412 |
| 43.685 | 1622.94121 | 1604 | 1773 | 1385 |
| 43.718 | 1620.14349 | 1601 | 1840 | 1396 |
| 43.751 | 1617.56211 | 1639 | 1908 | 1475 |
| 43.784 | 1614.83216 | 1724 | 1952 | 1470 |
| 43.817 | 1612.16656 | 1780 | 2017 | 1479 |
| 43.85  | 1609.60216 | 1879 | 2077 | 1614 |
| 43.883 | 1606.98119 | 1920 | 2167 | 1635 |
| 43.916 | 1604.47556 | 1984 | 2240 | 1650 |
| 43.949 | 1601.97927 | 2121 | 2328 | 1704 |
| 43.982 | 1599.47614 | 2226 | 2384 | 1756 |
| 44.015 | 1596.88752 | 2341 | 2481 | 1886 |
| 44.048 | 1594.27416 | 2453 | 2622 | 1945 |
| 44.081 | 1591.68319 | 2561 | 2641 | 1895 |
| 44.114 | 1589.07095 | 2666 | 2762 | 1896 |
| 44.147 | 1586.1799  | 2739 | 2887 | 1945 |
| 44.18  | 1583.43833 | 2841 | 2846 | 1991 |
| 44.213 | 1580.76435 | 2861 | 2855 | 1949 |
| 44.246 | 1578.18337 | 2896 | 2785 | 1900 |

|        |            |      |      |      |
|--------|------------|------|------|------|
| 44.279 | 1575.95582 | 3022 | 2780 | 1891 |
| 44.312 | 1573.52478 | 2903 | 2756 | 1914 |
| 44.345 | 1571.01139 | 2716 | 2596 | 1809 |
| 44.378 | 1568.46094 | 2635 | 2440 | 1687 |
| 44.411 | 1565.95445 | 2523 | 2311 | 1633 |
| 44.444 | 1563.49383 | 2294 | 2198 | 1575 |
| 44.477 | 1561.21029 | 2161 | 2143 | 1531 |
| 44.51  | 1558.80157 | 2058 | 2049 | 1470 |
| 44.543 | 1556.32957 | 1949 | 1932 | 1405 |
| 44.576 | 1553.79767 | 1836 | 1786 | 1423 |
| 44.609 | 1551.34515 | 1732 | 1738 | 1351 |
| 44.642 | 1548.72467 | 1689 | 1759 | 1299 |
| 44.675 | 1546.21829 | 1673 | 1640 | 1269 |
| 44.708 | 1544.19653 | 1639 | 1573 | 1230 |
| 44.741 | 1541.94045 | 1562 | 1584 | 1187 |
| 44.774 | 1539.56326 | 1513 | 1555 | 1152 |
| 44.807 | 1537.12378 | 1460 | 1527 | 1137 |
| 44.84  | 1534.8256  | 1420 | 1511 | 1131 |
| 44.873 | 1532.49708 | 1393 | 1465 | 1108 |
| 44.906 | 1530.02448 | 1334 | 1416 | 1070 |
| 44.939 | 1527.83143 | 1298 | 1411 | 1047 |
| 44.972 | 1525.71403 | 1315 | 1378 | 1043 |
| 45.005 | 1523.2678  | 1316 | 1304 | 1057 |
| 45.038 | 1520.857   | 1228 | 1248 | 1033 |
| 45.071 | 1518.46185 | 1175 | 1227 | 998  |
| 45.104 | 1516.23082 | 1164 | 1228 | 988  |
| 45.137 | 1514.16347 | 1144 | 1220 | 998  |
| 45.17  | 1511.74134 | 1126 | 1200 | 985  |
| 45.203 | 1509.29968 | 1090 | 1179 | 939  |
| 45.236 | 1506.94711 | 1074 | 1144 | 963  |
| 45.269 | 1504.44158 | 1050 | 1169 | 977  |
| 45.302 | 1502.09214 | 1064 | 1174 | 930  |
| 45.335 | 1499.88882 | 1045 | 1131 | 893  |
| 45.368 | 1497.63787 | 1039 | 1123 | 884  |
| 45.401 | 1495.15328 | 1035 | 1142 | 865  |
| 45.434 | 1492.46686 | 1014 | 1132 | 899  |
| 45.467 | 1489.77507 | 985  | 1103 | 881  |
| 45.5   | 1487.45438 | 986  | 1092 | 847  |
| 45.533 | 1485.10761 | 986  | 1050 | 878  |
| 45.566 | 1482.88619 | 992  | 1070 | 830  |
| 45.599 | 1480.79265 | 941  | 1032 | 839  |

|        |            |     |      |     |
|--------|------------|-----|------|-----|
| 45.632 | 1478.48349 | 947 | 1066 | 849 |
| 45.665 | 1476.56082 | 937 | 1004 | 836 |
| 45.698 | 1474.55325 | 931 | 1030 | 834 |
| 45.731 | 1472.46633 | 886 | 983  | 837 |
| 45.764 | 1470.30612 | 894 | 1017 | 770 |
| 45.797 | 1468.13862 | 947 | 981  | 851 |
| 45.83  | 1465.72339 | 934 | 1027 | 850 |
| 45.863 | 1463.41646 | 960 | 992  | 779 |
| 45.896 | 1461.39227 | 909 | 943  | 783 |
| 45.929 | 1459.25448 | 878 | 1033 | 797 |
| 45.962 | 1457.26243 | 870 | 910  | 803 |
| 45.995 | 1455.13732 | 936 | 1014 | 745 |
| 46.028 | 1453.3059  | 865 | 906  | 758 |
| 46.061 | 1451.32061 | 878 | 931  | 759 |
| 46.094 | 1449.62003 | 874 | 983  | 778 |
| 46.127 | 1447.85284 | 849 | 963  | 773 |
| 46.16  | 1445.77584 | 830 | 995  | 764 |
| 46.193 | 1444.02834 | 841 | 933  | 791 |
| 46.226 | 1442.35378 | 811 | 922  | 756 |
| 46.259 | 1440.91086 | 885 | 962  | 752 |
| 46.292 | 1439.27343 | 853 | 928  | 815 |
| 46.325 | 1437.52414 | 825 | 904  | 714 |
| 46.358 | 1435.88897 | 835 | 885  | 734 |
| 46.391 | 1434.2037  | 804 | 852  | 779 |
| 46.424 | 1432.36036 | 880 | 921  | 778 |
| 46.457 | 1430.60502 | 800 | 908  | 744 |
| 46.49  | 1429.04602 | 844 | 927  | 746 |
| 46.523 | 1427.53008 | 849 | 913  | 745 |
| 46.556 | 1426.12715 | 797 | 871  | 747 |
| 46.589 | 1424.6208  | 841 | 903  | 750 |
| 46.622 | 1423.13214 | 854 | 936  | 729 |
| 46.655 | 1421.78529 | 843 | 926  | 797 |
| 46.688 | 1420.55545 | 805 | 867  | 763 |
| 46.721 | 1419.17642 | 794 | 885  | 732 |
| 46.754 | 1417.58053 | 799 | 952  | 750 |
| 46.787 | 1416.06265 | 790 | 907  | 738 |
| 46.82  | 1414.83518 | 800 | 897  | 726 |
| 46.853 | 1413.82234 | 792 | 931  | 739 |
| 46.886 | 1412.74384 | 806 | 878  | 702 |
| 46.919 | 1411.41831 | 792 | 859  | 696 |
| 46.952 | 1410.03403 | 792 | 827  | 700 |

|        |            |     |     |     |
|--------|------------|-----|-----|-----|
| 46.985 | 1408.76909 | 782 | 839 | 733 |
| 47.018 | 1407.4026  | 770 | 872 | 742 |
| 47.051 | 1406.24063 | 804 | 923 | 714 |
| 47.084 | 1404.92916 | 802 | 919 | 689 |
| 47.117 | 1403.5997  | 770 | 880 | 716 |
| 47.15  | 1402.28541 | 751 | 895 | 739 |
| 47.183 | 1401.0579  | 749 | 891 | 701 |
| 47.216 | 1399.94556 | 748 | 841 | 670 |
| 47.249 | 1398.71567 | 739 | 826 | 701 |
| 47.282 | 1397.72824 | 753 | 893 | 709 |
| 47.315 | 1396.58217 | 746 | 916 | 684 |
| 47.348 | 1395.39312 | 756 | 875 | 652 |
| 47.381 | 1394.17582 | 752 | 845 | 685 |
| 47.414 | 1393.04775 | 742 | 847 | 718 |
| 47.447 | 1391.85015 | 744 | 855 | 705 |
| 47.48  | 1390.70766 | 740 | 850 | 690 |
| 47.513 | 1389.53086 | 754 | 844 | 691 |
| 47.546 | 1388.28993 | 763 | 821 | 709 |
| 47.579 | 1387.12527 | 722 | 798 | 710 |
| 47.612 | 1385.97596 | 691 | 811 | 695 |
| 47.645 | 1385.17592 | 729 | 813 | 667 |
| 47.678 | 1384.03113 | 724 | 791 | 679 |
| 47.711 | 1382.51215 | 713 | 790 | 712 |
| 47.744 | 1381.10151 | 729 | 798 | 697 |
| 47.777 | 1379.77961 | 713 | 819 | 659 |
| 47.81  | 1378.43607 | 747 | 851 | 675 |
| 47.843 | 1377.0302  | 753 | 855 | 687 |
| 47.876 | 1375.45689 | 706 | 842 | 669 |
| 47.909 | 1373.86349 | 730 | 841 | 663 |
| 47.942 | 1372.32533 | 732 | 807 | 674 |
| 47.975 | 1370.46659 | 693 | 785 | 658 |
| 48.008 | 1368.56768 | 671 | 811 | 651 |
| 48.041 | 1366.73199 | 696 | 832 | 627 |
| 48.074 | 1364.5841  | 729 | 824 | 646 |
| 48.107 | 1362.2171  | 726 | 828 | 633 |
| 48.14  | 1359.77042 | 722 | 829 | 590 |
| 48.173 | 1357.67788 | 679 | 861 | 646 |
| 48.206 | 1355.21009 | 698 | 868 | 640 |
| 48.239 | 1352.85916 | 696 | 842 | 632 |
| 48.272 | 1350.29347 | 666 | 818 | 659 |
| 48.305 | 1347.43796 | 689 | 814 | 649 |



|        |            |     |     |     |
|--------|------------|-----|-----|-----|
| 48.338 | 1344.44094 | 697 | 816 | 634 |
| 48.371 | 1341.71962 | 693 | 792 | 625 |
| 48.404 | 1338.83955 | 721 | 788 | 660 |
| 48.437 | 1336.29103 | 656 | 785 | 684 |
| 48.47  | 1333.58239 | 690 | 825 | 653 |
| 48.503 | 1330.83459 | 672 | 814 | 640 |
| 48.536 | 1328.53488 | 687 | 847 | 673 |
| 48.569 | 1326.02271 | 682 | 845 | 686 |
| 48.602 | 1323.48862 | 674 | 838 | 646 |
| 48.635 | 1321.01561 | 762 | 877 | 636 |
| 48.668 | 1318.76348 | 655 | 838 | 644 |
| 48.701 | 1316.49407 | 672 | 810 | 625 |
| 48.734 | 1314.09377 | 684 | 830 | 633 |
| 48.767 | 1311.911   | 670 | 831 | 654 |
| 48.8   | 1309.581   | 684 | 827 | 602 |
| 48.833 | 1307.53634 | 698 | 827 | 628 |
| 48.866 | 1305.13964 | 634 | 759 | 626 |
| 48.899 | 1302.89626 | 704 | 793 | 651 |
| 48.932 | 1300.33257 | 665 | 785 | 626 |
| 48.965 | 1297.82967 | 670 | 736 | 648 |
| 48.998 | 1295.50158 | 747 | 767 | 642 |
| 49.031 | 1293.14384 | 682 | 810 | 655 |
| 49.064 | 1290.99584 | 667 | 818 | 658 |
| 49.097 | 1289.10769 | 671 | 786 | 655 |
| 49.13  | 1286.9325  | 667 | 786 | 620 |
| 49.163 | 1284.52794 | 674 | 756 | 638 |
| 49.196 | 1282.25031 | 660 | 743 | 649 |
| 49.229 | 1280.1158  | 638 | 776 | 631 |
| 49.262 | 1277.89042 | 649 | 743 | 632 |
| 49.295 | 1275.8184  | 667 | 778 | 640 |
| 49.328 | 1273.5142  | 657 | 753 | 582 |
| 49.361 | 1270.86429 | 640 | 778 | 643 |
| 49.394 | 1268.45041 | 628 | 736 | 690 |
| 49.427 | 1266.25846 | 671 | 770 | 659 |
| 49.46  | 1264.05275 | 665 | 745 | 612 |
| 49.493 | 1261.81597 | 686 | 746 | 634 |
| 49.526 | 1259.74189 | 650 | 771 | 618 |
| 49.559 | 1257.82232 | 643 | 764 | 609 |
| 49.592 | 1255.79487 | 618 | 827 | 604 |
| 49.625 | 1253.73859 | 635 | 810 | 601 |
| 49.658 | 1251.56401 | 659 | 767 | 604 |

|        |            |     |     |     |
|--------|------------|-----|-----|-----|
| 49.691 | 1249.44831 | 663 | 756 | 602 |
| 49.724 | 1247.28649 | 665 | 715 | 622 |
| 49.757 | 1245.16393 | 638 | 735 | 625 |
| 49.79  | 1243.22998 | 639 | 741 | 611 |
| 49.823 | 1241.11979 | 630 | 721 | 613 |
| 49.856 | 1239.09104 | 612 | 722 | 585 |
| 49.889 | 1237.06562 | 632 | 719 | 567 |
| 49.922 | 1235.00005 | 648 | 762 | 604 |
| 49.955 | 1232.98304 | 653 | 767 | 614 |
| 49.988 | 1230.95864 | 660 | 741 | 601 |
| 50.021 | 1228.93075 | 658 | 748 | 587 |
| 50.054 | 1226.84164 | 663 | 741 | 558 |
| 50.087 | 1224.89641 | 650 | 723 | 571 |
| 50.12  | 1222.88873 | 625 | 712 | 607 |
| 50.153 | 1220.92418 | 618 | 712 | 586 |
| 50.186 | 1219.05003 | 622 | 730 | 576 |
| 50.219 | 1217.07044 | 634 | 751 | 600 |
| 50.252 | 1215.27824 | 631 | 747 | 593 |
| 50.285 | 1213.59172 | 618 | 733 | 579 |
| 50.318 | 1211.6995  | 623 | 717 | 582 |
| 50.351 | 1209.73586 | 629 | 731 | 589 |
| 50.384 | 1207.89689 | 626 | 770 | 562 |
| 50.417 | 1205.83518 | 634 | 724 | 574 |
| 50.45  | 1204.13926 | 635 | 691 | 585 |
| 50.483 | 1201.96938 | 626 | 715 | 585 |
| 50.516 | 1199.88547 | 596 | 705 | 558 |
| 50.549 | 1198.07111 | 592 | 683 | 545 |
| 50.582 | 1196.30598 | 599 | 717 | 582 |
| 50.615 | 1194.45998 | 646 | 713 | 615 |
| 50.648 | 1192.47247 | 614 | 706 | 600 |
| 50.681 | 1190.61517 | 623 | 702 | 615 |
| 50.714 | 1188.8021  | 594 | 700 | 605 |
| 50.747 | 1187.25317 | 638 | 734 | 563 |
| 50.78  | 1185.98226 | 615 | 732 | 606 |
| 50.813 | 1184.24441 | 589 | 723 | 579 |
| 50.846 | 1182.36183 | 602 | 693 | 596 |
| 50.879 | 1180.6984  | 626 | 728 | 600 |
| 50.912 | 1178.92015 | 567 | 709 | 577 |
| 50.945 | 1177.15692 | 563 | 723 | 586 |
| 50.978 | 1175.30508 | 572 | 669 | 579 |
| 51.011 | 1173.67595 | 623 | 717 | 516 |

|        |            |     |     |     |
|--------|------------|-----|-----|-----|
| 51.044 | 1172.06371 | 641 | 711 | 508 |
| 51.077 | 1170.42561 | 607 | 761 | 568 |
| 51.11  | 1168.52988 | 632 | 663 | 577 |
| 51.143 | 1166.68936 | 586 | 678 | 574 |
| 51.176 | 1165.11202 | 610 | 746 | 583 |
| 51.209 | 1163.64919 | 617 | 743 | 572 |
| 51.242 | 1161.56093 | 610 | 674 | 555 |
| 51.275 | 1159.58297 | 604 | 647 | 600 |
| 51.308 | 1158.07755 | 604 | 653 | 543 |
| 51.341 | 1156.15776 | 613 | 699 | 541 |
| 51.374 | 1154.32088 | 575 | 736 | 536 |
| 51.407 | 1152.70521 | 557 | 668 | 563 |
| 51.44  | 1150.91146 | 637 | 726 | 565 |
| 51.473 | 1149.10188 | 594 | 690 | 537 |
| 51.506 | 1147.46048 | 598 | 678 | 604 |
| 51.539 | 1145.85483 | 615 | 723 | 550 |
| 51.572 | 1144.31404 | 594 | 680 | 573 |
| 51.605 | 1142.72456 | 602 | 686 | 528 |
| 51.638 | 1140.91779 | 596 | 700 | 553 |
| 51.671 | 1139.18599 | 575 | 689 | 545 |
| 51.704 | 1137.6147  | 590 | 697 | 561 |
| 51.737 | 1135.99954 | 616 | 719 | 558 |
| 51.77  | 1134.43246 | 585 | 739 | 586 |
| 51.803 | 1133.06283 | 596 | 698 | 569 |
| 51.836 | 1131.31149 | 592 | 699 | 548 |
| 51.869 | 1129.58399 | 581 | 724 | 533 |
| 51.902 | 1128.15059 | 608 | 728 | 530 |
| 51.935 | 1126.71508 | 579 | 679 | 554 |
| 51.968 | 1125.12099 | 595 | 675 | 596 |
| 52.001 | 1123.62004 | 604 | 727 | 544 |
| 52.034 | 1122.10518 | 565 | 668 | 550 |
| 52.067 | 1120.4874  | 575 | 671 | 599 |
| 52.1   | 1118.85902 | 589 | 690 | 573 |
| 52.133 | 1117.35904 | 571 | 680 | 545 |
| 52.166 | 1115.92988 | 573 | 674 | 582 |
| 52.199 | 1114.4128  | 578 | 710 | 591 |
| 52.232 | 1112.99483 | 590 | 741 | 561 |
| 52.265 | 1111.5466  | 616 | 754 | 561 |
| 52.298 | 1110.08397 | 603 | 744 | 577 |
| 52.331 | 1108.74037 | 591 | 694 | 575 |
| 52.364 | 1107.31619 | 581 | 681 | 558 |

|        |            |     |     |     |
|--------|------------|-----|-----|-----|
| 52.397 | 1105.74335 | 578 | 713 | 552 |
| 52.43  | 1104.21136 | 565 | 701 | 570 |
| 52.463 | 1102.75477 | 572 | 685 | 552 |
| 52.496 | 1101.27617 | 588 | 697 | 545 |
| 52.529 | 1099.77539 | 609 | 726 | 530 |
| 52.562 | 1098.39277 | 599 | 697 | 546 |
| 52.595 | 1097.043   | 600 | 645 | 571 |
| 52.628 | 1095.71074 | 609 | 651 | 560 |
| 52.661 | 1094.29415 | 610 | 673 | 566 |
| 52.694 | 1092.83637 | 608 | 679 | 583 |
| 52.727 | 1091.43915 | 588 | 689 | 575 |
| 52.76  | 1090.28775 | 586 | 691 | 570 |
| 52.793 | 1089.21306 | 599 | 665 | 575 |
| 52.826 | 1088.02245 | 591 | 642 | 563 |
| 52.859 | 1086.88226 | 588 | 660 | 527 |
| 52.892 | 1085.63957 | 577 | 696 | 503 |
| 52.925 | 1084.32879 | 568 | 713 | 542 |
| 52.958 | 1083.03937 | 602 | 702 | 547 |
| 52.991 | 1081.69158 | 565 | 662 | 511 |
| 53.024 | 1080.41795 | 570 | 650 | 531 |
| 53.057 | 1079.17506 | 578 | 696 | 518 |
| 53.09  | 1078.00944 | 569 | 678 | 513 |
| 53.123 | 1076.67263 | 556 | 640 | 545 |
| 53.156 | 1075.22293 | 532 | 663 | 530 |
| 53.189 | 1073.88925 | 544 | 655 | 515 |
| 53.222 | 1072.88019 | 549 | 613 | 539 |
| 53.255 | 1071.80997 | 553 | 618 | 543 |
| 53.288 | 1070.70929 | 574 | 636 | 523 |
| 53.321 | 1069.52751 | 583 | 645 | 515 |
| 53.354 | 1068.41832 | 558 | 634 | 523 |
| 53.387 | 1067.10488 | 571 | 621 | 545 |
| 53.42  | 1065.81754 | 585 | 647 | 561 |
| 53.453 | 1064.78768 | 597 | 677 | 559 |
| 53.486 | 1063.42041 | 539 | 639 | 558 |
| 53.519 | 1062.34087 | 557 | 631 | 532 |
| 53.552 | 1061.29097 | 548 | 619 | 516 |
| 53.585 | 1060.26786 | 584 | 601 | 503 |
| 53.618 | 1059.11187 | 569 | 628 | 532 |
| 53.651 | 1058.15521 | 528 | 619 | 500 |
| 53.684 | 1057.07566 | 513 | 585 | 516 |
| 53.717 | 1055.90086 | 548 | 629 | 492 |

|        |            |     |     |     |
|--------|------------|-----|-----|-----|
| 53.75  | 1054.72887 | 549 | 623 | 502 |
| 53.783 | 1053.71146 | 584 | 612 | 533 |
| 53.816 | 1052.76536 | 556 | 597 | 523 |
| 53.849 | 1051.59956 | 548 | 651 | 515 |
| 53.882 | 1050.6306  | 561 | 632 | 552 |
| 53.915 | 1049.73295 | 572 | 643 | 521 |
| 53.948 | 1048.73341 | 550 | 579 | 539 |
| 53.981 | 1047.80981 | 550 | 649 | 534 |
| 54.014 | 1046.45016 | 519 | 626 | 491 |
| 54.047 | 1045.08674 | 547 | 648 | 488 |
| 54.08  | 1044.01429 | 580 | 605 | 528 |
| 54.113 | 1042.99055 | 524 | 673 | 537 |
| 54.146 | 1041.89289 | 556 | 666 | 537 |
| 54.179 | 1040.81289 | 534 | 613 | 514 |
| 54.212 | 1039.74859 | 543 | 597 | 540 |
| 54.245 | 1038.68191 | 539 | 636 | 529 |
| 54.278 | 1037.32046 | 559 | 632 | 520 |
| 54.311 | 1036.31306 | 511 | 633 | 544 |
| 54.344 | 1035.37588 | 537 | 615 | 532 |
| 54.377 | 1034.25782 | 557 | 628 | 516 |
| 54.41  | 1032.92456 | 542 | 630 | 470 |
| 54.443 | 1031.61935 | 578 | 612 | 501 |
| 54.476 | 1030.40022 | 531 | 610 | 516 |
| 54.509 | 1029.35825 | 548 | 641 | 511 |
| 54.542 | 1028.1359  | 517 | 621 | 512 |
| 54.575 | 1026.66797 | 543 | 595 | 513 |
| 54.608 | 1025.35503 | 559 | 633 | 503 |
| 54.641 | 1024.16375 | 548 | 599 | 524 |
| 54.674 | 1023.03702 | 535 | 579 | 530 |
| 54.707 | 1021.7932  | 503 | 595 | 528 |
| 54.74  | 1020.48615 | 535 | 592 | 512 |
| 54.773 | 1019.48032 | 539 | 567 | 523 |
| 54.806 | 1018.62769 | 521 | 569 | 523 |
| 54.839 | 1017.80138 | 509 | 605 | 518 |
| 54.872 | 1016.79472 | 489 | 633 | 500 |
| 54.905 | 1015.82809 | 516 | 616 | 503 |
| 54.938 | 1014.89334 | 506 | 608 | 513 |
| 54.971 | 1013.95982 | 514 | 621 | 510 |
| 55.004 | 1012.88697 | 551 | 603 | 506 |
| 55.037 | 1011.73698 | 542 | 609 | 518 |
| 55.07  | 1010.63685 | 530 | 636 | 526 |

|        |            |     |     |     |
|--------|------------|-----|-----|-----|
| 55.103 | 1009.55719 | 508 | 638 | 499 |
| 55.136 | 1008.45721 | 532 | 609 | 501 |
| 55.169 | 1007.46953 | 562 | 597 | 498 |
| 55.202 | 1006.55552 | 556 | 603 | 491 |
| 55.235 | 1005.59878 | 508 | 601 | 495 |
| 55.268 | 1004.35148 | 472 | 601 | 490 |
| 55.301 | 1003.1298  | 488 | 606 | 481 |
| 55.334 | 1001.89941 | 504 | 615 | 505 |
| 55.367 | 1000.60645 | 516 | 579 | 520 |
| 55.4   | 999.42068  | 538 | 563 | 487 |
| 55.433 | 998.24459  | 528 | 592 | 495 |
| 55.466 | 997.26983  | 514 | 604 | 497 |
| 55.499 | 996.32462  | 525 | 610 | 490 |
| 55.532 | 995.1382   | 516 | 608 | 519 |
| 55.565 | 994.00257  | 534 | 627 | 512 |
| 55.598 | 992.81326  | 545 | 594 | 488 |
| 55.631 | 991.72819  | 554 | 605 | 499 |
| 55.664 | 990.42371  | 561 | 632 | 530 |
| 55.697 | 989.38325  | 554 | 610 | 534 |
| 55.73  | 988.42144  | 543 | 598 | 563 |
| 55.763 | 987.42325  | 544 | 606 | 536 |
| 55.796 | 986.47469  | 569 | 625 | 520 |
| 55.829 | 985.45146  | 566 | 624 | 492 |
| 55.862 | 984.18033  | 532 | 587 | 503 |
| 55.895 | 983.20721  | 532 | 569 | 505 |
| 55.928 | 982.24568  | 533 | 622 | 509 |
| 55.961 | 981.38153  | 533 | 612 | 495 |
| 55.994 | 980.31675  | 524 | 598 | 489 |
| 56.027 | 979.11813  | 500 | 593 | 504 |
| 56.06  | 977.97738  | 519 | 564 | 557 |
| 56.093 | 976.92208  | 521 | 605 | 483 |
| 56.126 | 975.65608  | 523 | 606 | 459 |
| 56.159 | 974.67435  | 535 | 572 | 507 |
| 56.192 | 973.45137  | 502 | 588 | 448 |
| 56.225 | 972.16217  | 480 | 603 | 497 |
| 56.258 | 970.72428  | 502 | 586 | 486 |
| 56.291 | 969.45789  | 520 | 604 | 479 |
| 56.324 | 967.8871   | 524 | 600 | 461 |
| 56.357 | 966.02037  | 463 | 551 | 468 |
| 56.39  | 964.36017  | 510 | 568 | 487 |
| 56.423 | 962.54675  | 474 | 537 | 499 |

|        |           |     |     |     |
|--------|-----------|-----|-----|-----|
| 56.456 | 960.83258 | 506 | 642 | 485 |
| 56.489 | 958.90106 | 507 | 569 | 467 |
| 56.522 | 957.19744 | 508 | 580 | 497 |
| 56.555 | 955.61565 | 468 | 552 | 483 |
| 56.588 | 953.73186 | 465 | 594 | 477 |
| 56.621 | 952.0547  | 521 | 568 | 483 |
| 56.654 | 950.53103 | 508 | 594 | 469 |
| 56.687 | 949.2344  | 490 | 613 | 502 |
| 56.72  | 947.96449 | 466 | 638 | 483 |
| 56.753 | 946.69033 | 488 | 589 | 498 |
| 56.786 | 945.31513 | 517 | 551 | 492 |
| 56.819 | 944.15719 | 524 | 566 | 511 |
| 56.852 | 942.97248 | 484 | 544 | 462 |
| 56.885 | 941.69471 | 507 | 553 | 491 |
| 56.918 | 940.52349 | 509 | 559 | 501 |
| 56.951 | 939.4089  | 515 | 585 | 503 |
| 56.984 | 938.36783 | 496 | 580 | 477 |
| 57.017 | 937.25097 | 504 | 581 | 478 |
| 57.05  | 936.23465 | 499 | 549 | 467 |
| 57.083 | 935.30627 | 509 | 526 | 451 |
| 57.116 | 934.39379 | 485 | 566 | 474 |
| 57.149 | 933.42475 | 476 | 554 | 498 |
| 57.182 | 932.48721 | 516 | 564 | 471 |
| 57.215 | 931.58998 | 488 | 568 | 508 |
| 57.248 | 930.56933 | 506 | 569 | 495 |
| 57.281 | 929.49723 | 496 | 600 | 471 |
| 57.314 | 928.44715 | 480 | 564 | 490 |
| 57.347 | 927.5795  | 494 | 541 | 516 |
| 57.38  | 926.7388  | 495 | 552 | 502 |
| 57.413 | 925.76641 | 504 | 590 | 479 |
| 57.446 | 924.79376 | 460 | 561 | 458 |
| 57.479 | 923.95252 | 483 | 552 | 472 |
| 57.512 | 922.97918 | 494 | 538 | 492 |
| 57.545 | 921.84168 | 488 | 517 | 503 |
| 57.578 | 920.84469 | 490 | 517 | 487 |
| 57.611 | 920.0254  | 497 | 542 | 477 |
| 57.644 | 919.14811 | 501 | 563 | 471 |
| 57.677 | 918.34628 | 507 | 575 | 455 |
| 57.71  | 917.55836 | 515 | 591 | 438 |
| 57.743 | 916.81192 | 498 | 566 | 464 |
| 57.776 | 916.05753 | 467 | 524 | 519 |

|        |           |     |     |     |
|--------|-----------|-----|-----|-----|
| 57.809 | 915.20365 | 462 | 554 | 499 |
| 57.842 | 914.15601 | 492 | 572 | 460 |
| 57.875 | 913.10902 | 502 | 556 | 472 |
| 57.908 | 912.28196 | 496 | 554 | 506 |
| 57.941 | 911.59631 | 499 | 522 | 499 |
| 57.974 | 910.71816 | 474 | 527 | 467 |
| 58.007 | 909.74439 | 480 | 559 | 472 |
| 58.04  | 908.87677 | 497 | 545 | 467 |
| 58.073 | 907.93004 | 491 | 551 | 467 |
| 58.106 | 906.82512 | 485 | 557 | 494 |
| 58.139 | 905.92267 | 444 | 537 | 508 |
| 58.172 | 904.98159 | 458 | 519 | 492 |
| 58.205 | 904.1996  | 478 | 526 | 460 |
| 58.238 | 903.45925 | 493 | 538 | 454 |
| 58.271 | 902.67065 | 487 | 543 | 475 |
| 58.304 | 902.11839 | 524 | 548 | 485 |
| 58.337 | 901.37897 | 541 | 582 | 444 |
| 58.37  | 900.60247 | 514 | 570 | 447 |
| 58.403 | 899.53439 | 493 | 544 | 465 |
| 58.436 | 898.65011 | 509 | 545 | 464 |
| 58.469 | 897.72669 | 472 | 513 | 479 |
| 58.502 | 896.77296 | 503 | 527 | 497 |
| 58.535 | 895.89755 | 444 | 554 | 478 |
| 58.568 | 895.21201 | 459 | 546 | 463 |
| 58.601 | 894.54425 | 464 | 531 | 458 |
| 58.634 | 893.87025 | 501 | 533 | 488 |
| 58.667 | 893.18372 | 507 | 581 | 490 |
| 58.7   | 892.52753 | 463 | 569 | 476 |
| 58.733 | 891.72494 | 442 | 513 | 451 |
| 58.766 | 890.80135 | 479 | 555 | 452 |
| 58.799 | 890.02383 | 484 | 534 | 468 |
| 58.832 | 889.03647 | 464 | 566 | 477 |
| 58.865 | 888.08819 | 499 | 527 | 469 |
| 58.898 | 887.06175 | 488 | 571 | 439 |
| 58.931 | 886.28561 | 474 | 521 | 458 |
| 58.964 | 885.67685 | 476 | 540 | 478 |
| 58.997 | 884.8049  | 487 | 529 | 455 |
| 59.03  | 883.97171 | 481 | 525 | 454 |
| 59.063 | 883.2575  | 466 | 532 | 440 |
| 59.096 | 882.63289 | 456 | 522 | 501 |
| 59.129 | 882.0211  | 473 | 557 | 411 |



|        |           |     |     |     |
|--------|-----------|-----|-----|-----|
| 59.162 | 881.42574 | 449 | 560 | 472 |
| 59.195 | 880.75076 | 482 | 549 | 464 |
| 59.228 | 880.11077 | 470 | 537 | 436 |
| 59.261 | 879.33062 | 486 | 500 | 489 |
| 59.294 | 878.4241  | 476 | 539 | 471 |
| 59.327 | 877.64003 | 478 | 515 | 448 |
| 59.36  | 876.64676 | 487 | 507 | 455 |
| 59.393 | 875.84007 | 440 | 563 | 460 |
| 59.426 | 874.90283 | 460 | 523 | 465 |
| 59.459 | 874.06211 | 495 | 573 | 488 |
| 59.492 | 873.26269 | 432 | 550 | 443 |
| 59.525 | 872.37564 | 491 | 518 | 433 |
| 59.558 | 871.58161 | 471 | 495 | 493 |
| 59.591 | 870.83031 | 451 | 516 | 464 |
| 59.624 | 870.06288 | 430 | 544 | 434 |
| 59.657 | 869.20595 | 493 | 528 | 474 |
| 59.69  | 868.47755 | 497 | 519 | 476 |
| 59.723 | 867.75768 | 462 | 541 | 444 |
| 59.756 | 866.77684 | 445 | 534 | 454 |
| 59.789 | 865.92634 | 463 | 512 | 442 |
| 59.822 | 865.05047 | 446 | 538 | 458 |
| 59.855 | 864.3609  | 447 | 509 | 445 |
| 59.888 | 863.52999 | 445 | 531 | 426 |
| 59.921 | 862.66164 | 430 | 511 | 435 |
| 59.954 | 861.8855  | 462 | 509 | 454 |
| 59.987 | 861.2655  | 455 | 521 | 449 |
| 60.02  | 860.72004 | 494 | 495 | 441 |
| 60.053 | 860.14729 | 486 | 493 | 451 |
| 60.086 | 859.58122 | 456 | 499 | 438 |
| 60.119 | 859.03202 | 450 | 526 | 450 |
| 60.152 | 858.39773 | 463 | 507 | 456 |
| 60.185 | 857.61219 | 469 | 514 | 445 |
| 60.218 | 856.91772 | 438 | 509 | 471 |
| 60.251 | 856.39251 | 475 | 527 | 478 |
| 60.284 | 855.90867 | 488 | 547 | 495 |
| 60.317 | 855.28881 | 449 | 520 | 487 |
| 60.35  | 854.55538 | 428 | 511 | 428 |
| 60.383 | 853.8784  | 441 | 499 | 436 |
| 60.416 | 853.09635 | 452 | 476 | 478 |
| 60.449 | 852.43281 | 444 | 502 | 482 |
| 60.482 | 851.81979 | 456 | 513 | 470 |

|        |           |     |     |     |
|--------|-----------|-----|-----|-----|
| 60.515 | 851.25799 | 472 | 504 | 449 |
| 60.548 | 850.7595  | 445 | 521 | 459 |
| 60.581 | 850.15154 | 417 | 527 | 473 |
| 60.614 | 849.43085 | 444 | 535 | 452 |
| 60.647 | 848.82897 | 463 | 545 | 462 |
| 60.68  | 848.2943  | 440 | 527 | 466 |
| 60.713 | 847.65043 | 459 | 499 | 451 |
| 60.746 | 847.03275 | 473 | 496 | 456 |
| 60.779 | 846.35381 | 454 | 516 | 465 |
| 60.812 | 845.76647 | 494 | 523 | 485 |
| 60.845 | 845.162   | 476 | 514 | 479 |
| 60.878 | 844.6259  | 433 | 534 | 445 |
| 60.911 | 844.15936 | 463 | 533 | 445 |
| 60.944 | 843.59649 | 447 | 495 | 444 |
| 60.977 | 843.06908 | 435 | 532 | 443 |
| 61.01  | 842.41295 | 460 | 546 | 446 |
| 61.043 | 841.75157 | 463 | 520 | 462 |
| 61.076 | 841.02851 | 440 | 525 | 460 |
| 61.109 | 840.54443 | 475 | 493 | 463 |
| 61.142 | 839.87066 | 458 | 527 | 458 |
| 61.175 | 839.47038 | 438 | 541 | 457 |
| 61.208 | 838.95778 | 463 | 515 | 461 |
| 61.241 | 838.46055 | 454 | 508 | 449 |
| 61.274 | 837.83166 | 473 | 523 | 447 |
| 61.307 | 836.96464 | 460 | 508 | 446 |
| 61.34  | 836.60944 | 438 | 518 | 444 |
| 61.373 | 836.08649 | 443 | 497 | 452 |
| 61.406 | 835.62275 | 435 | 489 | 431 |
| 61.439 | 835.17274 | 445 | 528 | 475 |
| 61.472 | 834.7477  | 462 | 545 | 474 |
| 61.505 | 834.10262 | 483 | 506 | 472 |
| 61.538 | 833.69411 | 462 | 552 | 442 |
| 61.571 | 833.24814 | 426 | 519 | 475 |
| 61.604 | 832.69751 | 439 | 483 | 504 |
| 61.637 | 831.99697 | 462 | 526 | 450 |
| 61.67  | 831.36983 | 468 | 505 | 430 |
| 61.703 | 830.73891 | 510 | 466 | 447 |
| 61.736 | 830.16612 | 478 | 492 | 468 |
| 61.769 | 829.70849 | 455 | 512 | 477 |
| 61.802 | 829.41633 | 508 | 516 | 427 |
| 61.835 | 829.20107 | 471 | 527 | 466 |

|        |           |     |     |     |
|--------|-----------|-----|-----|-----|
| 61.868 | 828.89066 | 472 | 548 | 467 |
| 61.901 | 828.29662 | 486 | 548 | 486 |
| 61.934 | 827.82488 | 442 | 543 | 436 |
| 61.967 | 827.384   | 441 | 597 | 457 |
| 62     | 826.99546 | 476 | 526 | 449 |
| 62.033 | 826.55391 | 505 | 473 | 447 |
| 62.066 | 825.93597 | 452 | 552 | 470 |
| 62.099 | 825.46904 | 492 | 533 | 449 |
| 62.132 | 824.882   | 481 | 522 | 427 |
| 62.165 | 824.43875 | 469 | 505 | 474 |
| 62.198 | 824.04576 | 478 | 511 | 479 |
| 62.231 | 823.45064 | 467 | 537 | 502 |
| 62.264 | 822.94941 | 473 | 559 | 444 |
| 62.297 | 822.42673 | 436 | 587 | 500 |
| 62.33  | 821.84987 | 471 | 566 | 463 |
| 62.363 | 821.58956 | 496 | 545 | 473 |
| 62.396 | 820.93837 | 472 | 507 | 455 |
| 62.429 | 820.43566 | 473 | 498 | 453 |
| 62.462 | 820.05165 | 478 | 534 | 448 |
| 62.495 | 819.7114  | 489 | 550 | 471 |
| 62.528 | 819.2657  | 518 | 560 | 463 |
| 62.561 | 818.82312 | 489 | 534 | 465 |
| 62.594 | 818.36806 | 478 | 544 | 468 |
| 62.627 | 817.90472 | 521 | 552 | 451 |
| 62.66  | 817.23534 | 498 | 565 | 474 |
| 62.693 | 816.67735 | 476 | 566 | 501 |
| 62.726 | 816.16629 | 508 | 544 | 495 |
| 62.759 | 815.64954 | 513 | 562 | 493 |
| 62.792 | 815.26307 | 497 | 550 | 492 |
| 62.825 | 814.96646 | 495 | 577 | 488 |
| 62.858 | 814.51956 | 515 | 540 | 495 |
| 62.891 | 814.0687  | 505 | 543 | 481 |
| 62.924 | 813.6081  | 507 | 547 | 467 |
| 62.957 | 813.17302 | 506 | 545 | 491 |
| 62.99  | 812.71927 | 510 | 576 | 494 |
| 63.023 | 812.1303  | 520 | 607 | 511 |
| 63.056 | 811.78695 | 520 | 600 | 524 |
| 63.089 | 811.36342 | 528 | 588 | 504 |
| 63.122 | 810.86421 | 520 | 575 | 489 |
| 63.155 | 810.48394 | 497 | 572 | 487 |
| 63.188 | 810.09263 | 508 | 612 | 492 |

|        |           |      |      |      |
|--------|-----------|------|------|------|
| 63.221 | 809.56607 | 535  | 641  | 507  |
| 63.254 | 809.04233 | 548  | 644  | 517  |
| 63.287 | 808.79713 | 557  | 642  | 532  |
| 63.32  | 808.48779 | 560  | 649  | 547  |
| 63.353 | 808.19051 | 544  | 642  | 545  |
| 63.386 | 807.73057 | 539  | 634  | 563  |
| 63.419 | 807.27046 | 598  | 655  | 557  |
| 63.452 | 806.84476 | 595  | 677  | 548  |
| 63.485 | 806.42366 | 581  | 683  | 541  |
| 63.518 | 806.13518 | 593  | 670  | 578  |
| 63.551 | 805.99978 | 621  | 699  | 579  |
| 63.584 | 805.68799 | 623  | 746  | 608  |
| 63.617 | 805.56417 | 623  | 748  | 629  |
| 63.65  | 805.26256 | 651  | 745  | 629  |
| 63.683 | 804.84784 | 651  | 744  | 609  |
| 63.716 | 804.41344 | 658  | 757  | 636  |
| 63.749 | 803.74206 | 682  | 811  | 672  |
| 63.782 | 803.22639 | 682  | 864  | 697  |
| 63.815 | 802.81065 | 708  | 855  | 710  |
| 63.848 | 802.40248 | 718  | 886  | 703  |
| 63.881 | 801.91874 | 750  | 936  | 733  |
| 63.914 | 801.5075  | 851  | 946  | 778  |
| 63.947 | 801.16064 | 867  | 973  | 805  |
| 63.98  | 800.9081  | 876  | 1017 | 796  |
| 64.013 | 800.6074  | 916  | 1026 | 818  |
| 64.046 | 800.32168 | 964  | 1124 | 876  |
| 64.079 | 800.05746 | 970  | 1219 | 949  |
| 64.112 | 799.49326 | 1079 | 1225 | 911  |
| 64.145 | 798.97065 | 1142 | 1299 | 994  |
| 64.178 | 798.64965 | 1241 | 1337 | 1021 |
| 64.211 | 798.35969 | 1322 | 1365 | 1021 |
| 64.244 | 797.80167 | 1385 | 1468 | 1142 |
| 64.277 | 797.2963  | 1503 | 1499 | 1139 |
| 64.31  | 796.80666 | 1563 | 1571 | 1179 |
| 64.343 | 796.12759 | 1700 | 1622 | 1164 |
| 64.376 | 795.50045 | 1654 | 1642 | 1253 |
| 64.409 | 795.01086 | 1628 | 1571 | 1159 |
| 64.442 | 794.44689 | 1652 | 1628 | 1147 |
| 64.475 | 794.0153  | 1645 | 1537 | 1136 |
| 64.508 | 793.54319 | 1625 | 1533 | 1070 |
| 64.541 | 792.82324 | 1473 | 1451 | 1056 |

|        |           |      |      |      |
|--------|-----------|------|------|------|
| 64.574 | 792.29062 | 1426 | 1409 | 1060 |
| 64.607 | 791.88715 | 1368 | 1371 | 957  |
| 64.64  | 791.33208 | 1324 | 1284 | 930  |
| 64.673 | 790.61334 | 1208 | 1177 | 865  |
| 64.706 | 789.94529 | 1173 | 1150 | 869  |
| 64.739 | 789.4615  | 1067 | 1071 | 778  |
| 64.772 | 788.83133 | 1055 | 1074 | 788  |
| 64.805 | 788.15855 | 978  | 947  | 780  |
| 64.838 | 787.6097  | 952  | 1002 | 744  |
| 64.871 | 786.96763 | 925  | 962  | 716  |
| 64.904 | 786.28085 | 896  | 879  | 683  |
| 64.937 | 785.47043 | 792  | 857  | 680  |
| 64.97  | 784.67113 | 744  | 835  | 681  |
| 65.003 | 783.98397 | 760  | 791  | 652  |
| 65.036 | 783.27659 | 782  | 791  | 613  |
| 65.069 | 782.4793  | 761  | 776  | 620  |
| 65.102 | 781.69393 | 663  | 746  | 619  |
| 65.135 | 781.1132  | 617  | 775  | 604  |
| 65.168 | 780.45229 | 624  | 800  | 590  |
| 65.201 | 779.77738 | 610  | 717  | 585  |
| 65.234 | 779.30738 | 626  | 685  | 589  |
| 65.267 | 778.71669 | 630  | 683  | 576  |
| 65.3   | 778.13739 | 596  | 668  | 574  |
| 65.333 | 777.61603 | 586  | 657  | 539  |
| 65.366 | 777.35972 | 602  | 662  | 530  |
| 65.399 | 776.81131 | 598  | 626  | 548  |
| 65.432 | 776.24217 | 584  | 625  | 525  |
| 65.465 | 775.73001 | 558  | 621  | 531  |
| 65.498 | 775.07142 | 543  | 631  | 556  |
| 65.531 | 774.56445 | 565  | 641  | 528  |
| 65.564 | 773.99818 | 553  | 603  | 497  |
| 65.597 | 773.39737 | 528  | 570  | 487  |
| 65.63  | 772.97777 | 533  | 573  | 493  |
| 65.663 | 772.43383 | 524  | 576  | 506  |
| 65.696 | 771.86525 | 523  | 579  | 489  |
| 65.729 | 771.30691 | 532  | 577  | 503  |
| 65.762 | 770.86226 | 518  | 562  | 485  |
| 65.795 | 770.27596 | 503  | 544  | 462  |
| 65.828 | 769.87368 | 486  | 546  | 492  |
| 65.861 | 769.2714  | 487  | 558  | 474  |
| 65.894 | 768.78781 | 491  | 551  | 452  |

|        |           |     |     |     |
|--------|-----------|-----|-----|-----|
| 65.927 | 768.13836 | 470 | 534 | 449 |
| 65.96  | 767.58269 | 498 | 507 | 465 |
| 65.993 | 766.96927 | 529 | 502 | 471 |
| 66.026 | 766.46292 | 495 | 549 | 459 |
| 66.059 | 765.92287 | 467 | 575 | 461 |
| 66.092 | 765.1956  | 460 | 527 | 444 |
| 66.125 | 764.61489 | 452 | 520 | 462 |
| 66.158 | 763.97887 | 439 | 511 | 465 |
| 66.191 | 763.42676 | 431 | 502 | 462 |
| 66.224 | 762.87989 | 458 | 517 | 463 |
| 66.257 | 762.27204 | 462 | 532 | 436 |
| 66.29  | 761.72018 | 455 | 526 | 466 |
| 66.323 | 761.11008 | 458 | 498 | 452 |
| 66.356 | 760.60867 | 465 | 509 | 449 |
| 66.389 | 760.01468 | 455 | 531 | 471 |
| 66.422 | 759.43522 | 469 | 527 | 449 |
| 66.455 | 758.84451 | 450 | 532 | 480 |
| 66.488 | 758.31326 | 449 | 518 | 440 |
| 66.521 | 757.71224 | 449 | 522 | 423 |
| 66.554 | 757.05231 | 476 | 471 | 441 |
| 66.587 | 756.63887 | 418 | 482 | 436 |
| 66.62  | 756.33767 | 455 | 458 | 412 |
| 66.653 | 755.73497 | 438 | 495 | 429 |
| 66.686 | 755.1533  | 423 | 491 | 450 |
| 66.719 | 754.62985 | 423 | 532 | 435 |
| 66.752 | 754.10558 | 445 | 548 | 425 |
| 66.785 | 753.58818 | 448 | 476 | 423 |
| 66.818 | 753.00261 | 467 | 491 | 441 |
| 66.851 | 752.56664 | 450 | 508 | 422 |
| 66.884 | 752.1166  | 422 | 511 | 442 |
| 66.917 | 751.80231 | 456 | 499 | 399 |
| 66.95  | 751.31074 | 422 | 478 | 428 |
| 66.983 | 750.90287 | 443 | 508 | 431 |
| 67.016 | 750.65889 | 394 | 478 | 424 |
| 67.049 | 750.30581 | 434 | 490 | 444 |
| 67.082 | 749.78769 | 461 | 486 | 374 |
| 67.115 | 749.34811 | 436 | 487 | 405 |
| 67.148 | 749.04165 | 441 | 492 | 443 |
| 67.181 | 748.65188 | 408 | 493 | 395 |
| 67.214 | 748.00871 | 418 | 470 | 435 |
| 67.247 | 747.432   | 435 | 455 | 443 |

|        |           |     |     |     |
|--------|-----------|-----|-----|-----|
| 67.28  | 747.03306 | 410 | 497 | 413 |
| 67.313 | 746.58839 | 459 | 479 | 414 |
| 67.346 | 746.16152 | 440 | 482 | 420 |
| 67.379 | 745.40605 | 445 | 489 | 394 |
| 67.412 | 744.63344 | 383 | 515 | 405 |
| 67.445 | 743.82008 | 450 | 458 | 416 |
| 67.478 | 742.97402 | 405 | 479 | 410 |
| 67.511 | 742.34409 | 438 | 471 | 442 |
| 67.544 | 741.74694 | 462 | 500 | 435 |
| 67.577 | 740.94951 | 420 | 509 | 423 |
| 67.61  | 740.32572 | 432 | 483 | 421 |
| 67.643 | 739.65476 | 431 | 465 | 425 |
| 67.676 | 738.85608 | 397 | 478 | 414 |
| 67.709 | 737.79202 | 393 | 518 | 437 |
| 67.742 | 736.70638 | 394 | 491 | 403 |
| 67.775 | 735.78734 | 410 | 467 | 404 |
| 67.808 | 734.84258 | 418 | 468 | 399 |
| 67.841 | 734.01717 | 433 | 474 | 399 |
| 67.874 | 733.22557 | 411 | 473 | 386 |
| 67.907 | 732.30786 | 438 | 461 | 408 |
| 67.94  | 731.53673 | 457 | 453 | 394 |
| 67.973 | 730.65717 | 398 | 486 | 369 |
| 68.006 | 729.87967 | 381 | 475 | 362 |
| 68.039 | 728.97658 | 386 | 441 | 408 |
| 68.072 | 728.14184 | 384 | 447 | 426 |
| 68.105 | 727.39784 | 380 | 466 | 401 |
| 68.138 | 726.69171 | 386 | 459 | 401 |
| 68.171 | 725.99882 | 423 | 451 | 402 |
| 68.204 | 725.26611 | 412 | 460 | 392 |
| 68.237 | 724.54809 | 415 | 490 | 389 |
| 68.27  | 723.74202 | 424 | 478 | 396 |
| 68.303 | 722.81276 | 412 | 446 | 415 |
| 68.336 | 721.94199 | 390 | 457 | 408 |
| 68.369 | 721.28098 | 384 | 475 | 389 |
| 68.402 | 720.63117 | 399 | 458 | 397 |
| 68.435 | 719.77664 | 414 | 438 | 406 |
| 68.468 | 718.85023 | 433 | 464 | 390 |
| 68.501 | 718.11651 | 422 | 469 | 369 |
| 68.534 | 717.09578 | 412 | 454 | 382 |
| 68.567 | 716.15598 | 410 | 473 | 402 |
| 68.6   | 715.337   | 409 | 464 | 386 |

|        |           |     |     |     |
|--------|-----------|-----|-----|-----|
| 68.633 | 714.52763 | 394 | 462 | 372 |
| 68.666 | 713.67887 | 387 | 485 | 390 |
| 68.699 | 712.8044  | 404 | 486 | 407 |
| 68.732 | 711.98544 | 415 | 461 | 403 |
| 68.765 | 711.22931 | 410 | 466 | 387 |
| 68.798 | 710.42396 | 403 | 488 | 399 |
| 68.831 | 709.63733 | 399 | 489 | 401 |
| 68.864 | 708.99597 | 417 | 470 | 411 |
| 68.897 | 708.08902 | 433 | 468 | 384 |
| 68.93  | 707.16828 | 426 | 452 | 409 |
| 68.963 | 706.45317 | 381 | 436 | 411 |
| 68.996 | 705.7378  | 375 | 472 | 389 |
| 69.029 | 704.98566 | 404 | 450 | 392 |
| 69.062 | 704.0623  | 399 | 436 | 394 |
| 69.095 | 703.33319 | 427 | 464 | 409 |
| 69.128 | 702.4298  | 462 | 431 | 403 |
| 69.161 | 701.70134 | 419 | 433 | 390 |
| 69.194 | 701.17672 | 400 | 470 | 394 |
| 69.227 | 700.56971 | 379 | 444 | 375 |
| 69.26  | 699.84714 | 383 | 444 | 333 |
| 69.293 | 699.02728 | 414 | 476 | 388 |
| 69.326 | 698.41886 | 396 | 439 | 381 |
| 69.359 | 697.64746 | 406 | 397 | 392 |
| 69.392 | 696.84296 | 418 | 443 | 392 |
| 69.425 | 696.17736 | 413 | 464 | 367 |
| 69.458 | 695.41414 | 394 | 446 | 395 |
| 69.491 | 694.64246 | 401 | 477 | 414 |
| 69.524 | 694.00129 | 415 | 459 | 393 |
| 69.557 | 693.42518 | 437 | 415 | 384 |
| 69.59  | 692.92367 | 425 | 470 | 404 |
| 69.623 | 692.31807 | 398 | 441 | 405 |
| 69.656 | 691.81239 | 414 | 438 | 388 |
| 69.689 | 691.045   | 404 | 501 | 361 |
| 69.722 | 690.50252 | 368 | 477 | 418 |
| 69.755 | 690.03947 | 381 | 419 | 396 |
| 69.788 | 689.51763 | 387 | 415 | 392 |
| 69.821 | 688.86272 | 387 | 503 | 358 |
| 69.854 | 688.39602 | 415 | 441 | 358 |
| 69.887 | 688.16666 | 406 | 434 | 392 |
| 69.92  | 687.48855 | 351 | 448 | 372 |
| 69.953 | 686.91566 | 406 | 463 | 349 |



|        |           |     |     |     |
|--------|-----------|-----|-----|-----|
| 69.986 | 686.40851 | 450 | 443 | 413 |
| 70.019 | 685.8484  | 419 | 415 | 420 |
| 70.052 | 685.45815 | 380 | 435 | 388 |
| 70.085 | 690.59235 | 401 | 436 | 366 |
| 70.118 | 690.16099 | 368 | 463 | 375 |
| 70.151 | 689.73499 | 355 | 473 | 406 |
| 70.184 | 689.31438 | 411 | 491 | 382 |
| 70.217 | 688.89918 | 377 | 465 | 383 |
| 70.25  | 688.4894  | 404 | 446 | 413 |
| 70.283 | 688.08505 | 385 | 434 | 369 |
| 70.316 | 687.68615 | 386 | 415 | 395 |
| 70.349 | 687.29272 | 371 | 425 | 399 |
| 70.382 | 686.90477 | 378 | 451 | 364 |
| 70.415 | 686.52232 | 398 | 443 | 373 |
| 70.448 | 686.14536 | 403 | 438 | 361 |
| 70.481 | 685.77393 | 403 | 465 | 380 |
| 70.514 | 685.40803 | 384 | 473 | 403 |
| 70.547 | 685.04767 | 401 | 470 | 399 |
| 70.58  | 684.69286 | 417 | 476 | 410 |
| 70.613 | 684.34361 | 399 | 418 | 370 |
| 70.646 | 683.99993 | 404 | 435 | 353 |
| 70.679 | 683.66183 | 397 | 455 | 386 |
| 70.712 | 683.32932 | 386 | 458 | 392 |
| 70.745 | 683.0024  | 384 | 447 | 387 |
| 70.778 | 682.68109 | 380 | 440 | 388 |
| 70.811 | 682.36538 | 391 | 446 | 398 |
| 70.844 | 682.05528 | 377 | 441 | 384 |
| 70.877 | 681.7508  | 382 | 458 | 371 |
| 70.91  | 681.45194 | 396 | 465 | 396 |
| 70.943 | 681.15871 | 402 | 448 | 373 |
| 70.976 | 680.87111 | 398 | 425 | 366 |
| 71.009 | 680.58913 | 371 | 430 | 394 |
| 71.042 | 680.31279 | 370 | 441 | 385 |
| 71.075 | 680.04208 | 363 | 431 | 366 |
| 71.108 | 679.77701 | 369 | 458 | 373 |
| 71.141 | 679.51756 | 388 | 449 | 403 |
| 71.174 | 679.26375 | 377 | 435 | 397 |
| 71.207 | 679.01557 | 385 | 461 | 391 |
| 71.24  | 678.77302 | 378 | 448 | 382 |
| 71.273 | 678.5361  | 382 | 454 | 384 |
| 71.306 | 678.30479 | 401 | 428 | 376 |

|        |           |     |     |     |
|--------|-----------|-----|-----|-----|
| 71.339 | 678.07911 | 397 | 459 | 382 |
| 71.372 | 677.85904 | 408 | 471 | 404 |
| 71.405 | 677.64457 | 416 | 457 | 399 |
| 71.438 | 677.43571 | 401 | 469 | 411 |
| 71.471 | 677.23245 | 366 | 473 | 390 |
| 71.504 | 677.03477 | 371 | 470 | 398 |
| 71.537 | 676.84266 | 353 | 454 | 374 |
| 71.57  | 676.65613 | 348 | 455 | 376 |
| 71.603 | 676.47517 | 362 | 465 | 382 |
| 71.636 | 676.29975 | 393 | 444 | 389 |
| 71.669 | 676.12987 | 401 | 435 | 388 |
| 71.702 | 675.96552 | 385 | 419 | 380 |
| 71.735 | 675.80669 | 402 | 430 | 433 |
| 71.768 | 675.65336 | 381 | 443 | 402 |
| 71.801 | 675.50552 | 365 | 456 | 400 |
| 71.834 | 675.36315 | 391 | 437 | 378 |
| 71.867 | 675.22625 | 391 | 438 | 367 |
| 71.9   | 675.09479 | 404 | 424 | 362 |
| 71.933 | 674.96876 | 397 | 449 | 363 |
| 71.966 | 674.84815 | 416 | 440 | 371 |
| 71.999 | 674.73292 | 413 | 466 | 366 |
| 72.032 | 674.62308 | 353 | 445 | 357 |
| 72.065 | 674.51859 | 400 | 455 | 364 |
| 72.098 | 674.41944 | 363 | 439 | 376 |
| 72.131 | 674.3256  | 360 | 475 | 404 |
| 72.164 | 674.23706 | 387 | 443 | 400 |
| 72.197 | 674.1538  | 414 | 454 | 416 |
| 72.23  | 674.07578 | 384 | 475 | 317 |
| 72.263 | 674.00299 | 418 | 450 | 404 |
| 72.296 | 673.93541 | 399 | 465 | 368 |
| 72.329 | 673.87301 | 418 | 459 | 353 |
| 72.362 | 673.81575 | 387 | 486 | 401 |
| 72.395 | 673.76363 | 382 | 447 | 373 |
| 72.428 | 673.71661 | 393 | 430 | 392 |
| 72.461 | 673.67466 | 443 | 472 | 379 |
| 72.494 | 673.63775 | 414 | 452 | 373 |
| 72.527 | 673.60586 | 372 | 440 | 395 |
| 72.56  | 673.57896 | 371 | 464 | 363 |
| 72.593 | 673.55701 | 395 | 449 | 403 |
| 72.626 | 673.53999 | 346 | 420 | 384 |
| 72.659 | 673.52786 | 373 | 442 | 401 |

|        |           |     |     |     |
|--------|-----------|-----|-----|-----|
| 72.692 | 673.52058 | 412 | 454 | 396 |
| 72.725 | 673.51814 | 411 | 451 | 379 |
| 72.758 | 673.52048 | 383 | 468 | 373 |
| 72.791 | 673.52759 | 353 | 455 | 394 |
| 72.824 | 673.53941 | 375 | 448 | 405 |
| 72.857 | 673.55592 | 384 | 453 | 391 |
| 72.89  | 673.57707 | 389 | 454 | 363 |
| 72.923 | 673.60284 | 388 | 452 | 354 |
| 72.956 | 673.63318 | 361 | 433 | 369 |
| 72.989 | 673.66805 | 346 | 441 | 387 |
| 73.022 | 673.70741 | 396 | 468 | 408 |
| 73.055 | 673.75122 | 419 | 472 | 357 |
| 73.088 | 673.79944 | 424 | 447 | 360 |
| 73.121 | 673.85202 | 388 | 442 | 398 |
| 73.154 | 673.90893 | 380 | 452 | 380 |
| 73.187 | 673.97012 | 383 | 446 | 360 |
| 73.22  | 674.03554 | 389 | 450 | 362 |
| 73.253 | 674.10516 | 403 | 448 | 365 |
| 73.286 | 674.17891 | 390 | 440 | 374 |
| 73.319 | 674.25676 | 379 | 466 | 394 |
| 73.352 | 674.33866 | 379 | 447 | 381 |
| 73.385 | 674.42456 | 364 | 451 | 404 |
| 73.418 | 674.5144  | 370 | 469 | 395 |
| 73.451 | 674.60815 | 399 | 452 | 378 |
| 73.484 | 674.70575 | 394 | 443 | 372 |
| 73.517 | 674.80714 | 397 | 468 | 361 |
| 73.55  | 674.91228 | 407 | 474 | 382 |
| 73.583 | 675.02111 | 427 | 458 | 392 |
| 73.616 | 675.13357 | 439 | 440 | 375 |
| 73.649 | 675.24962 | 417 | 446 | 375 |
| 73.682 | 675.36919 | 415 | 455 | 390 |
| 73.715 | 675.49224 | 400 | 451 | 393 |
| 73.748 | 675.61869 | 399 | 457 | 409 |
| 73.781 | 675.7485  | 416 | 451 | 410 |
| 73.814 | 675.88161 | 398 | 463 | 367 |
| 73.847 | 676.01795 | 399 | 440 | 371 |
| 73.88  | 676.15747 | 384 | 444 | 398 |
| 73.913 | 676.3001  | 383 | 453 | 365 |
| 73.946 | 676.44579 | 384 | 467 | 368 |
| 73.979 | 676.59446 | 403 | 469 | 379 |
| 74.012 | 676.74606 | 415 | 484 | 378 |

|        |           |     |     |     |
|--------|-----------|-----|-----|-----|
| 74.045 | 676.90052 | 413 | 497 | 391 |
| 74.078 | 677.05777 | 400 | 477 | 403 |
| 74.111 | 677.21775 | 396 | 451 | 403 |
| 74.144 | 677.3804  | 400 | 476 | 372 |
| 74.177 | 677.54564 | 407 | 471 | 385 |
| 74.21  | 677.7134  | 424 | 454 | 391 |
| 74.243 | 677.88363 | 422 | 477 | 408 |
| 74.276 | 678.05623 | 432 | 458 | 433 |
| 74.309 | 678.23116 | 449 | 467 | 399 |
| 74.342 | 678.40832 | 430 | 499 | 413 |
| 74.375 | 678.58765 | 404 | 462 | 436 |
| 74.408 | 678.76908 | 408 | 484 | 397 |
| 74.441 | 678.95254 | 450 | 513 | 392 |
| 74.474 | 679.13793 | 448 | 460 | 432 |
| 74.507 | 679.3252  | 415 | 482 | 439 |
| 74.54  | 679.51426 | 423 | 466 | 416 |
| 74.573 | 679.70504 | 425 | 479 | 417 |
| 74.606 | 679.89745 | 429 | 452 | 400 |
| 74.639 | 680.09142 | 434 | 471 | 368 |
| 74.672 | 680.28686 | 469 | 480 | 400 |
| 74.705 | 680.4837  | 440 | 446 | 434 |
| 74.738 | 680.68185 | 468 | 489 | 396 |
| 74.771 | 680.88123 | 419 | 478 | 399 |
| 74.804 | 681.08176 | 470 | 460 | 420 |
| 74.837 | 681.28335 | 446 | 449 | 397 |
| 74.87  | 681.48591 | 409 | 485 | 425 |
| 74.903 | 681.68937 | 396 | 478 | 449 |
| 74.936 | 681.89362 | 406 | 447 | 386 |
| 74.969 | 682.09859 | 454 | 483 | 368 |
| 75.002 | 682.30418 | 372 | 489 | 406 |
| 75.035 | 682.5103  | 402 | 495 | 445 |
| 75.068 | 682.71687 | 417 | 466 | 439 |
| 75.101 | 682.92379 | 424 | 490 | 439 |
| 75.134 | 683.13097 | 438 | 467 | 397 |
| 75.167 | 683.33832 | 420 | 478 | 398 |
| 75.2   | 683.54573 | 447 | 504 | 429 |
| 75.233 | 683.75312 | 451 | 521 | 426 |
| 75.266 | 683.96039 | 417 | 497 | 402 |
| 75.299 | 684.16745 | 402 | 527 | 436 |
| 75.332 | 684.37419 | 427 | 512 | 448 |
| 75.365 | 684.58051 | 448 | 445 | 407 |

|        |           |     |     |     |
|--------|-----------|-----|-----|-----|
| 75.398 | 684.78632 | 419 | 482 | 415 |
| 75.431 | 684.99151 | 450 | 535 | 417 |
| 75.464 | 685.19599 | 475 | 523 | 394 |
| 75.497 | 685.39965 | 430 | 539 | 430 |
| 75.53  | 685.60239 | 430 | 495 | 416 |
| 75.563 | 685.8041  | 456 | 506 | 442 |
| 75.596 | 686.00468 | 483 | 512 | 475 |
| 75.629 | 686.20402 | 483 | 504 | 462 |
| 75.662 | 686.40202 | 459 | 498 | 457 |
| 75.695 | 686.59857 | 446 | 484 | 435 |
| 75.728 | 686.79355 | 478 | 528 | 444 |
| 75.761 | 686.98686 | 485 | 535 | 431 |
| 75.794 | 687.17839 | 479 | 550 | 449 |
| 75.827 | 687.36803 | 487 | 553 | 453 |
| 75.86  | 687.55566 | 479 | 528 | 467 |
| 75.893 | 687.74117 | 451 | 529 | 480 |
| 75.926 | 687.92445 | 472 | 566 | 485 |
| 75.959 | 688.10538 | 491 | 551 | 477 |
| 75.992 | 688.28385 | 488 | 540 | 486 |
| 76.025 | 688.45973 | 492 | 589 | 486 |
| 76.058 | 688.63291 | 535 | 598 | 483 |
| 76.091 | 688.80327 | 541 | 603 | 497 |
| 76.124 | 688.97069 | 531 | 612 | 526 |
| 76.157 | 689.13505 | 525 | 617 | 518 |
| 76.19  | 689.29623 | 541 | 623 | 506 |
| 76.223 | 689.45411 | 553 | 604 | 522 |
| 76.256 | 689.60855 | 530 | 595 | 519 |
| 76.289 | 689.75944 | 533 | 621 | 531 |
| 76.322 | 689.90665 | 558 | 639 | 556 |
| 76.355 | 690.05006 | 580 | 642 | 559 |
| 76.388 | 690.18953 | 544 | 680 | 546 |
| 76.421 | 690.32494 | 547 | 702 | 545 |
| 76.454 | 690.45616 | 597 | 700 | 572 |
| 76.487 | 690.58305 | 638 | 692 | 609 |
| 76.52  | 690.70549 | 692 | 716 | 610 |
| 76.553 | 690.82335 | 650 | 760 | 586 |
| 76.586 | 690.93649 | 656 | 769 | 594 |
| 76.619 | 691.04477 | 690 | 765 | 610 |
| 76.652 | 691.14806 | 732 | 831 | 638 |
| 76.685 | 691.24623 | 753 | 847 | 660 |
| 76.718 | 691.33913 | 747 | 864 | 675 |

|        |           |      |      |      |
|--------|-----------|------|------|------|
| 76.751 | 691.42664 | 753  | 878  | 687  |
| 76.784 | 691.5086  | 749  | 903  | 753  |
| 76.817 | 691.58489 | 833  | 1008 | 719  |
| 76.85  | 691.65535 | 851  | 1003 | 778  |
| 76.883 | 691.71985 | 843  | 1022 | 825  |
| 76.916 | 691.77824 | 902  | 1036 | 821  |
| 76.949 | 691.83038 | 957  | 1055 | 830  |
| 76.982 | 691.87612 | 1022 | 1136 | 849  |
| 77.015 | 691.91533 | 1070 | 1184 | 887  |
| 77.048 | 691.94784 | 1157 | 1261 | 945  |
| 77.081 | 691.97351 | 1169 | 1303 | 1024 |
| 77.114 | 691.9922  | 1233 | 1352 | 1042 |
| 77.147 | 692.00375 | 1301 | 1423 | 1049 |
| 77.18  | 692.00802 | 1327 | 1438 | 1112 |
| 77.213 | 692.00484 | 1459 | 1523 | 1081 |
| 77.246 | 691.99407 | 1588 | 1559 | 1127 |
| 77.279 | 691.97555 | 1647 | 1591 | 1084 |
| 77.312 | 691.94913 | 1645 | 1577 | 1215 |
| 77.345 | 691.91465 | 1666 | 1577 | 1123 |
| 77.378 | 691.87195 | 1642 | 1529 | 1100 |
| 77.411 | 691.82088 | 1616 | 1493 | 1114 |
| 77.444 | 691.76128 | 1527 | 1568 | 1086 |
| 77.477 | 691.69298 | 1488 | 1529 | 1032 |
| 77.51  | 691.61583 | 1482 | 1455 | 983  |
| 77.543 | 691.52966 | 1337 | 1293 | 966  |
| 77.576 | 691.43431 | 1319 | 1263 | 919  |
| 77.609 | 691.32961 | 1274 | 1242 | 901  |
| 77.642 | 691.21541 | 1268 | 1213 | 897  |
| 77.675 | 691.09152 | 1149 | 1118 | 843  |
| 77.708 | 690.95779 | 1026 | 1060 | 841  |
| 77.741 | 690.81405 | 1045 | 1031 | 812  |
| 77.774 | 690.66013 | 1006 | 1041 | 762  |
| 77.807 | 690.49585 | 951  | 996  | 755  |
| 77.84  | 690.32105 | 923  | 902  | 776  |
| 77.873 | 690.13555 | 840  | 929  | 741  |
| 77.906 | 689.93918 | 793  | 871  | 653  |
| 77.939 | 689.73176 | 789  | 840  | 636  |
| 77.972 | 689.51312 | 757  | 836  | 653  |
| 78.005 | 689.28308 | 741  | 758  | 651  |
| 78.038 | 689.04147 | 696  | 731  | 623  |
| 78.071 | 688.7881  | 692  | 785  | 615  |

|        |           |     |     |     |
|--------|-----------|-----|-----|-----|
| 78.104 | 688.52279 | 689 | 709 | 604 |
| 78.137 | 688.24537 | 683 | 681 | 602 |
| 78.17  | 687.95565 | 690 | 727 | 586 |
| 78.203 | 687.65344 | 681 | 687 | 578 |
| 78.236 | 687.33857 | 636 | 687 | 541 |
| 78.269 | 687.01085 | 623 | 660 | 522 |
| 78.302 | 686.67009 | 622 | 643 | 520 |
| 78.335 | 686.3161  | 615 | 669 | 515 |
| 78.368 | 685.9487  | 580 | 686 | 523 |
| 78.401 | 685.56769 | 551 | 688 | 537 |
| 78.434 | 685.17289 | 554 | 646 | 501 |
| 78.467 | 684.7641  | 558 | 624 | 517 |
| 78.5   | 684.34113 | 537 | 613 | 557 |
| 78.533 | 683.90379 | 538 | 604 | 539 |
| 78.566 | 683.45188 | 556 | 586 | 507 |
| 78.599 | 682.9852  | 556 | 579 | 515 |
| 78.632 | 682.50356 | 535 | 579 | 502 |
| 78.665 | 682.00676 | 534 | 574 | 484 |
| 78.698 | 681.4946  | 538 | 560 | 482 |
| 78.731 | 680.96688 | 548 | 567 | 496 |
| 78.764 | 680.4234  | 542 | 593 | 508 |
| 78.797 | 679.86395 | 527 | 555 | 482 |
| 78.83  | 679.28833 | 520 | 502 | 470 |
| 78.863 | 678.69634 | 488 | 504 | 466 |
| 78.896 | 678.08777 | 477 | 537 | 453 |
| 78.929 | 677.46241 | 500 | 557 | 468 |
| 78.962 | 676.82005 | 516 | 544 | 483 |
| 78.995 | 676.16049 | 496 | 524 | 477 |
| 79.028 | 675.48352 | 469 | 500 | 453 |
| 79.061 | 674.78892 | 476 | 502 | 465 |
| 79.094 | 674.07647 | 488 | 531 | 471 |
| 79.127 | 673.34598 | 508 | 526 | 438 |
| 79.16  | 672.59721 | 482 | 521 | 432 |
| 79.193 | 671.82996 | 469 | 520 | 440 |
| 79.226 | 671.04401 | 485 | 519 | 448 |
| 79.259 | 670.23914 | 499 | 510 | 446 |
| 79.292 | 669.41512 | 464 | 488 | 444 |
| 79.325 | 668.57175 | 464 | 511 | 426 |
| 79.358 | 667.70879 | 476 | 503 | 424 |
| 79.391 | 666.82603 | 471 | 505 | 473 |
| 79.424 | 665.92324 | 495 | 549 | 448 |

|        |           |     |     |     |
|--------|-----------|-----|-----|-----|
| 79.457 | 665.0002  | 486 | 525 | 442 |
| 79.49  | 664.05667 | 464 | 502 | 417 |
| 79.523 | 663.09243 | 450 | 534 | 431 |
| 79.556 | 662.10726 | 465 | 492 | 447 |
| 79.589 | 661.10092 | 472 | 474 | 432 |
| 79.622 | 660.07319 | 466 | 499 | 436 |
| 79.655 | 659.02382 | 495 | 481 | 407 |
| 79.688 | 657.95259 | 465 | 517 | 429 |
| 79.721 | 656.85926 | 459 | 516 | 421 |
| 79.754 | 655.7436  | 471 | 490 | 458 |
| 79.787 | 654.60537 | 458 | 498 | 455 |
| 79.82  | 653.44434 | 426 | 490 | 425 |
| 79.853 | 652.26025 | 410 | 499 | 388 |
| 79.886 | 651.05288 | 447 | 476 | 420 |
| 79.919 | 649.82198 | 467 | 489 | 433 |
| 79.952 | 648.56731 | 431 | 462 | 426 |



**Fig 4 data:**

| 2%               |          | 3%               |          | 4%               |          |
|------------------|----------|------------------|----------|------------------|----------|
|                  | size(nm) |                  | size(nm) |                  | size(nm) |
| <b>Mean</b>      | 4.617391 | <b>Mean</b>      | 2.926402 | <b>Mean</b>      | 2.494203 |
| <b>Std. Dev.</b> | 1.962319 | <b>Std. Dev.</b> | 1.079439 | <b>Std. Dev.</b> | 1.613043 |
|                  | 4.888406 |                  | 2.247664 |                  | 1.168116 |
|                  | 4.465217 |                  | 4.233645 |                  | 1.744928 |
|                  | 8.111594 |                  | 3.292056 |                  | 2.049275 |
|                  | 2.613043 |                  | 1.523364 |                  | 1.763768 |
|                  | 5.828986 |                  | 2.231308 |                  | 0.915942 |
|                  | 4.104348 |                  | 1.077103 |                  | 1.792754 |
|                  | 6.068116 |                  | 1.558411 |                  | 2.049275 |
|                  | 6.366667 |                  | 6.32243  |                  | 0.927536 |
|                  | 7.269565 |                  | 5.129673 |                  | 1.62029  |
|                  | 7.22029  |                  | 3.658879 |                  | 1.131884 |
|                  | 9.071014 |                  | 1.518692 |                  | 1.478261 |
|                  | 8.57971  |                  | 2.920561 |                  | 0.927536 |
|                  | 6.165217 |                  | 1.174065 |                  | 1.54058  |
|                  | 2.463768 |                  | 1.901869 |                  | 1.54058  |
|                  | 4.582609 |                  | 3.213785 |                  | 1.769565 |
|                  | 7.592754 |                  | 1.755841 |                  | 1.449275 |
|                  | 3.333333 |                  | 1.684579 |                  | 2.018841 |
|                  | 4.928986 |                  | 1.203271 |                  | 1.750725 |
|                  | 4.747826 |                  | 2        |                  | 1.336232 |
|                  | 4.202899 |                  | 2.303738 |                  | 1.295652 |
|                  | 1.971014 |                  | 2.955607 |                  | 1.62029  |
|                  | 3.191304 |                  | 2.106308 |                  | 1.63913  |
|                  | 6.724638 |                  | 1.004673 |                  | 2.255072 |
|                  | 7.598551 |                  | 2.03972  |                  | 2.173913 |
|                  | 6.611594 |                  | 2.920561 |                  | 1.54058  |
|                  | 3.015942 |                  | 1.985981 |                  | 2.173913 |
|                  | 4.798551 |                  | 2.132009 |                  | 1.652174 |
|                  | 4.304348 |                  | 2.994159 |                  | 2.492754 |
|                  | 4.86087  |                  | 0.261682 |                  | 1.744928 |
|                  | 4.817391 |                  | 3.71028  |                  | 1.304348 |
|                  | 1.168116 |                  | 2.03972  |                  | 1.237681 |
|                  | 3.505797 |                  | 2.464953 |                  | 1.375362 |
|                  | 2.468116 |                  | 2.776869 |                  | 1.744928 |
|                  | 5.124638 |                  | 2.828271 |                  | 1.336232 |
|                  | 3.178261 |                  | 2.016355 |                  | 1.024638 |
|                  | 6.384058 |                  | 2.247664 |                  | 1.56087  |

|  |          |  |          |  |          |
|--|----------|--|----------|--|----------|
|  | 5.771014 |  | 5.728972 |  | 1.478261 |
|  | 1.336232 |  | 1.943925 |  | 1.73913  |
|  | 1.195652 |  | 4.130841 |  | 1.815942 |
|  | 6.088406 |  | 3.925234 |  | 3.588406 |
|  | 0.927536 |  | 3.712617 |  | 1.54058  |
|  | 1.230435 |  | 2.043224 |  | 1.295652 |
|  | 0.647826 |  | 2.984813 |  | 1.131884 |
|  | 0.844928 |  | 3.953271 |  | 0.844928 |
|  | 1.195652 |  | 3.405374 |  | 1.449275 |
|  | 3.894203 |  | 2.497664 |  | 1.104348 |
|  | 6.489855 |  | 4.01986  |  | 1.024638 |
|  | 6.231884 |  | 3.658879 |  | 1.366667 |
|  | 5.507246 |  | 1.406542 |  | 1.750725 |
|  | 5.942029 |  | 3.767523 |  | 2.155072 |
|  | 4.582609 |  | 3.459112 |  | 1.844928 |
|  | 3.081159 |  | 1.901869 |  | 1.652174 |
|  | 5.73913  |  | 1.672897 |  | 1.237681 |
|  | 6.191304 |  | 1.518692 |  | 1.492754 |
|  | 3.75942  |  | 4.463785 |  | 1.237681 |
|  | 4.4      |  | 4.390187 |  | 5.056522 |
|  | 5.975362 |  | 2.348131 |  | 2.291304 |
|  | 6.191304 |  | 3.03271  |  | 1.884058 |
|  | 3.101449 |  | 3.419393 |  | 1.971014 |
|  | 3.256522 |  | 3.28972  |  | 6.885507 |
|  | 6.252174 |  | 2.219626 |  | 1.652174 |
|  | 5.124638 |  | 4.264019 |  | 1.492754 |
|  | 6.681159 |  | 5.998832 |  | 1.456522 |
|  | 2.563768 |  | 3.396028 |  | 1.246377 |
|  | 8.376812 |  | 4.336449 |  | 1.769565 |
|  | 5.14058  |  | 2.464953 |  | 1.689855 |
|  | 6.686957 |  | 2.75     |  | 7.043478 |
|  | 0.724638 |  | 4.941589 |  | 4.826087 |
|  | 3.828986 |  | 4.175234 |  | 3.081159 |
|  | 5.73913  |  | 1.635514 |  | 1.492754 |
|  | 7.072464 |  | 2.348131 |  | 2.988406 |
|  | 1.055072 |  | 1.406542 |  | 4.262319 |
|  | 0.972464 |  | 3.522196 |  | 4.86087  |
|  | 1.375362 |  | 1.779206 |  | 2.788406 |
|  | 3.657971 |  | 2.338785 |  | 5.307246 |
|  | 2.988406 |  | 3.668224 |  | 1.594203 |
|  | 4.407246 |  | 2.825935 |  | 0.927536 |

|  |          |  |          |  |          |
|--|----------|--|----------|--|----------|
|  | 7.471014 |  | 4.328271 |  | 1.336232 |
|  | 2.663768 |  | 2.885514 |  | 4.817391 |
|  | 5.644928 |  | 2.223131 |  | 5.637681 |
|  | 5.975362 |  | 2.070093 |  | 2.898551 |
|  | 1.246377 |  | 1.651869 |  | 5.885507 |
|  | 7.47971  |  | 4.233645 |  | 2.089855 |
|  | 5.469565 |  | 4.621495 |  | 1.856522 |
|  | 4.213043 |  | 3.057243 |  | 6.471014 |
|  | 6.17971  |  | 2.561916 |  | 5.030435 |
|  | 5.252174 |  | 2.803738 |  | 4.986957 |
|  | 6.353623 |  | 1.869159 |  | 6.691304 |
|  | 1.750725 |  | 1.901869 |  | 2.411594 |
|  | 1.044928 |  | 3.767523 |  | 3.384058 |
|  | 1.131884 |  | 2.526869 |  | 1.695652 |
|  | 1.336232 |  | 1.73715  |  | 1.336232 |
|  | 1.246377 |  | 2.301402 |  | 1.689855 |
|  | 4.144928 |  | 2.978972 |  | 3.75942  |
|  | 4.550725 |  | 2.147196 |  | 2.268116 |
|  | 7.971014 |  | 4.810748 |  | 3.304348 |
|  | 5.771014 |  | 3.03972  |  | 8.426087 |
|  | 5.991304 |  | 3.03972  |  | 1.949275 |
|  | 3.97971  |  | 4.725467 |  | 1.15942  |
|  | 6.005797 |  | 4.397196 |  | 5.030435 |
|  | 5.8      |  | 2.483645 |  | 2.318841 |
|  | 5.975362 |  | 3.207944 |  | 6.142029 |
|  | 3.771014 |  | 6.649533 |  | 1.336232 |
|  | 1.601449 |  | 3.973131 |  | 1.652174 |
|  | 5.275362 |  | 2.69743  |  | 2.263768 |
|  | 2.463768 |  | 3.084112 |  | 5.753623 |
|  | 1.237681 |  | 2.625    |  | 2.263768 |
|  | 1.230435 |  | 1.813084 |  | 1.513043 |
|  | 7.791304 |  | 2.464953 |  | 1.304348 |
|  | 6.095652 |  | 4.698598 |  | 1.246377 |
|  | 3.128986 |  | 6.823598 |  | 1.769565 |
|  | 5.849275 |  | 2.079439 |  | 5.005797 |
|  | 5.718841 |  | 2.734813 |  | 3.502899 |
|  | 1.884058 |  | 5.056075 |  | 5.16087  |
|  | 6.223188 |  | 5.024533 |  | 5.869565 |
|  | 5.030435 |  | 5.879673 |  | 4.150725 |
|  | 4.605797 |  | 4.01986  |  | 3.942029 |
|  | 6.25942  |  | 3.213785 |  | 5.447826 |

|  |          |  |          |  |          |
|--|----------|--|----------|--|----------|
|  | 3.634783 |  | 1.73715  |  | 3.436232 |
|  | 5.65942  |  | 2.806075 |  | 1.434783 |
|  | 5.753623 |  | 3.449766 |  | 1.949275 |
|  | 3.285507 |  | 2.172897 |  | 1.744928 |
|  | 2.613043 |  | 3.857477 |  | 1.237681 |
|  | 6.971014 |  | 3.732477 |  | 3.902899 |
|  | 7.294203 |  | 2.172897 |  | 2.973913 |
|  | 3.489855 |  | 1.88785  |  | 5.455072 |
|  | 5.14058  |  | 2.823598 |  | 1.884058 |
|  | 2.049275 |  | 4.143692 |  | 2.468116 |
|  | 4.369565 |  | 3.247664 |  | 1.944928 |
|  | 6.436232 |  | 4.087617 |  | 6.756522 |
|  | 6.152174 |  | 3.156542 |  | 2.530435 |
|  | 2.898551 |  | 2.892523 |  | 3.285507 |
|  | 5.828986 |  | 1.957944 |  | 3.986957 |
|  | 3.986957 |  | 2.686916 |  | 1.295652 |
|  | 0.881159 |  | 2.336449 |  | 1.856522 |
|  | 4.104348 |  | 3.98715  |  | 1.313043 |
|  | 4.06087  |  | 1.496495 |  | 1.456522 |
|  | 5.321739 |  | 3.292056 |  | 2.075362 |
|  | 5.975362 |  | 2.978972 |  | 1.54058  |
|  | 4.927536 |  | 2.892523 |  | 1.449275 |
|  | 1.449275 |  | 2.689252 |  | 1.54058  |
|  | 7.911594 |  | 3.247664 |  | 1.750725 |
|  | 4.73913  |  | 3.084112 |  | 1.336232 |
|  | 2.217391 |  | 4.633178 |  | 1.195652 |
|  | 7.328986 |  | 3.761682 |  | 2.049275 |
|  | 6.871014 |  | 2.561916 |  | 1.295652 |
|  | 1.427536 |  | 3.084112 |  | 1.427536 |
|  | 0.82029  |  | 2.147196 |  | 1.594203 |
|  | 1.844928 |  | 2.564252 |  | 3.77971  |
|  | 2.857971 |  | 2.14486  |  | 1.844928 |
|  | 3.623188 |  | 3.154206 |  | 1.949275 |
|  | 5.669565 |  | 1.567757 |  | 5.185507 |
|  | 4.547826 |  | 4.175234 |  |          |
|  | 3.762319 |  | 3.904206 |  |          |
|  | 4.791304 |  | 2.823598 |  |          |
|  | 6.027536 |  | 2.336449 |  |          |
|  | 3.478261 |  | 1.901869 |  |          |
|  | 1.54058  |  | 2.247664 |  |          |
|  | 6.027536 |  | 2.75     |  |          |

|  |          |  |          |  |  |
|--|----------|--|----------|--|--|
|  | 6.836232 |  | 3.046729 |  |  |
|  | 5.508696 |  | 3.297897 |  |  |
|  | 1.427536 |  | 3.363318 |  |  |
|  | 1.168116 |  | 3.531542 |  |  |
|  | 3.395652 |  | 3.17757  |  |  |
|  | 3.77971  |  | 5.016355 |  |  |
|  | 5.024638 |  | 3.651869 |  |  |
|  | 7.185507 |  | 5.573598 |  |  |
|  | 3.201449 |  | 5.705607 |  |  |
|  | 4.928986 |  | 2.561916 |  |  |
|  | 5.828986 |  | 2.561916 |  |  |
|  | 7.407246 |  | 1.915888 |  |  |
|  | 5.842029 |  | 3.63785  |  |  |
|  | 7.74058  |  | 4.561916 |  |  |
|  | 6.272464 |  | 2.365654 |  |  |
|  | 5.455072 |  | 1.78271  |  |  |
|  | 0.781159 |  | 5.550234 |  |  |
|  | 2.268116 |  | 2.313084 |  |  |
|  | 5.024638 |  | 3.17757  |  |  |
|  | 4.150725 |  | 3.207944 |  |  |
|  | 4.8      |  | 3.003505 |  |  |
|  | 3.695652 |  | 3.634346 |  |  |
|  | 2.723188 |  | 4.841121 |  |  |
|  | 5.081159 |  | 2.920561 |  |  |
|  | 4.386957 |  | 1.684579 |  |  |
|  | 5.769565 |  | 2.204439 |  |  |
|  | 5.669565 |  | 2.727804 |  |  |
|  | 5.226087 |  | 2.689252 |  |  |
|  | 7.702899 |  | 2.195093 |  |  |
|  | 3.57971  |  | 2.408879 |  |  |
|  | 7.114493 |  | 4.212617 |  |  |
|  | 1.54058  |  | 2.477804 |  |  |
|  | 7.22029  |  | 2.066589 |  |  |
|  | 5.127536 |  | 3.452103 |  |  |
|  | 7.798551 |  | 3.964953 |  |  |
|  | 1.62029  |  | 2.561916 |  |  |
|  | 5.314493 |  | 3.156542 |  |  |
|  | 5.469565 |  | 1.426402 |  |  |
|  | 8.505797 |  | 2.350467 |  |  |
|  | 1.246377 |  | 2.268692 |  |  |
|  | 1.313043 |  | 2.593458 |  |  |

|  |          |  |          |  |  |
|--|----------|--|----------|--|--|
|  | 0.927536 |  | 1.241822 |  |  |
|  | 1.168116 |  | 1.869159 |  |  |
|  | 1.594203 |  | 2.57243  |  |  |
|  | 4.872464 |  | 2.864486 |  |  |
|  | 6.681159 |  | 3.057243 |  |  |
|  | 5.627536 |  | 3.566589 |  |  |
|  | 5.82029  |  | 1.523364 |  |  |
|  | 2.973913 |  | 4.561916 |  |  |
|  | 3.75942  |  | 2.219626 |  |  |
|  | 2.530435 |  | 4.050234 |  |  |
|  | 3.537681 |  | 2.089953 |  |  |
|  | 3.42029  |  | 1.264019 |  |  |
|  | 6.610145 |  | 2.204439 |  |  |
|  | 4.927536 |  | 1.943925 |  |  |
|  | 5.753623 |  | 2.268692 |  |  |
|  | 3.046377 |  | 3.156542 |  |  |
|  | 2.613043 |  | 2.231308 |  |  |
|  | 3.955072 |  | 2.974299 |  |  |
|  | 3.74058  |  | 4.115654 |  |  |
|  | 5.124638 |  | 2.948598 |  |  |
|  | 5.030435 |  | 2.885514 |  |  |
|  | 3.165217 |  | 3.134346 |  |  |
|  | 8.669565 |  | 2.873832 |  |  |
|  | 7.324638 |  | 2.564252 |  |  |
|  | 5.426087 |  | 2.561916 |  |  |
|  | 5.314493 |  | 2.669393 |  |  |
|  | 8.017391 |  | 1.989486 |  |  |
|  | 2.45942  |  | 1.755841 |  |  |
|  | 7.101449 |  | 2.757009 |  |  |
|  | 4.12029  |  | 2.009346 |  |  |
|  | 4.182609 |  | 3.761682 |  |  |
|  | 5.63913  |  | 3.405374 |  |  |
|  | 4.714493 |  | 2.350467 |  |  |
|  | 4.308696 |  | 1.989486 |  |  |
|  | 1.54058  |  | 3.968458 |  |  |
|  | 6.197101 |  | 3.321262 |  |  |
|  | 5.771014 |  | 1.901869 |  |  |
|  | 6.968116 |  | 4.714953 |  |  |
|  | 6.191304 |  | 4.561916 |  |  |
|  | 8.898551 |  | 1.883178 |  |  |
|  | 7.885507 |  | 2.625    |  |  |

|  |          |  |          |  |  |
|--|----------|--|----------|--|--|
|  | 1.478261 |  | 2.663551 |  |  |
|  | 3.311594 |  | 3.066589 |  |  |
|  | 6        |  | 3.093458 |  |  |
|  | 4.624638 |  | 3.560748 |  |  |
|  | 5.518841 |  | 1.635514 |  |  |
|  | 6.376812 |  | 2.61215  |  |  |
|  | 5.913043 |  | 3.473131 |  |  |
|  | 4.53913  |  | 3.435748 |  |  |
|  | 4.718841 |  | 2.268692 |  |  |
|  | 5.555072 |  | 2.991822 |  |  |
|  | 5.457971 |  | 2.397196 |  |  |
|  | 2.35942  |  | 4.299065 |  |  |
|  | 3.792754 |  | 1.817757 |  |  |
|  | 4.630435 |  | 2.901869 |  |  |
|  | 6.946377 |  | 2.508178 |  |  |
|  | 5.627536 |  | 2.244159 |  |  |
|  | 4.826087 |  | 1.883178 |  |  |
|  | 6.927536 |  | 4.148364 |  |  |
|  | 6.813043 |  | 2.561916 |  |  |
|  | 1.652174 |  | 3.046729 |  |  |
|  | 3.711594 |  | 4.385514 |  |  |
|  | 3.336232 |  | 3.188084 |  |  |
|  | 5.968116 |  | 1.846963 |  |  |
|  | 3.942029 |  | 3.066589 |  |  |
|  | 7.542029 |  | 1.915888 |  |  |
|  | 1.889855 |  | 4.080607 |  |  |
|  | 4.785507 |  | 1.883178 |  |  |
|  | 4.785507 |  | 1.933411 |  |  |
|  | 4.465217 |  | 1.366822 |  |  |
|  | 2.784058 |  | 2.76986  |  |  |
|  | 3.97971  |  | 2.36215  |  |  |
|  | 6.805797 |  | 3.904206 |  |  |
|  | 5.681159 |  | 3.63785  |  |  |
|  | 6.476812 |  | 3.814252 |  |  |
|  | 3.346377 |  | 3.245327 |  |  |
|  | 7.391304 |  | 1.660047 |  |  |
|  | 1.449275 |  | 1.869159 |  |  |
|  | 3.395652 |  | 3.628505 |  |  |
|  | 4.12029  |  | 2.301402 |  |  |
|  | 5.252174 |  | 4.234813 |  |  |
|  | 4.86087  |  | 2.477804 |  |  |

|  |          |  |          |  |  |
|--|----------|--|----------|--|--|
|  | 5.162319 |  | 1.264019 |  |  |
|  | 5.769565 |  | 1.401869 |  |  |
|  | 4.547826 |  | 1.463785 |  |  |
|  | 7.37971  |  | 2.593458 |  |  |
|  | 4.64058  |  | 2.106308 |  |  |
|  | 3.304348 |  | 2.497664 |  |  |
|  | 5.862319 |  | 1.989486 |  |  |
|  | 4.888406 |  |          |  |  |
|  | 4.182609 |  |          |  |  |
|  | 7.652174 |  |          |  |  |
|  | 5.785507 |  |          |  |  |
|  | 3.955072 |  |          |  |  |
|  | 7.107246 |  |          |  |  |
|  | 4.613043 |  |          |  |  |
|  | 5.957971 |  |          |  |  |
|  | 4.718841 |  |          |  |  |
|  | 3.588406 |  |          |  |  |
|  | 4.308696 |  |          |  |  |
|  | 5.455072 |  |          |  |  |
|  | 4.8      |  |          |  |  |
|  | 4.843478 |  |          |  |  |
|  | 8.17971  |  |          |  |  |
|  | 4.202899 |  |          |  |  |
|  | 5.362319 |  |          |  |  |
|  | 6.763768 |  |          |  |  |
|  | 3.711594 |  |          |  |  |
|  | 4.057971 |  |          |  |  |
|  | 2.757971 |  |          |  |  |
|  | 4.824638 |  |          |  |  |
|  | 2.013043 |  |          |  |  |
|  | 3.942029 |  |          |  |  |
|  | 4.465217 |  |          |  |  |
|  | 4.308696 |  |          |  |  |
|  | 2.695652 |  |          |  |  |
|  | 7.981159 |  |          |  |  |
|  | 9.891304 |  |          |  |  |
|  | 6.152174 |  |          |  |  |
|  | 5.17971  |  |          |  |  |
|  | 6.202899 |  |          |  |  |
|  | 6.927536 |  |          |  |  |
|  | 7.102899 |  |          |  |  |



|  |          |  |  |  |  |
|--|----------|--|--|--|--|
|  | 5.234783 |  |  |  |  |
|  | 3.565217 |  |  |  |  |
|  | 5.127536 |  |  |  |  |
|  | 5.5      |  |  |  |  |
|  | 3.957971 |  |  |  |  |
|  | 5.652174 |  |  |  |  |
|  | 4.8      |  |  |  |  |
|  | 5.071014 |  |  |  |  |
|  | 5.275362 |  |  |  |  |
|  | 6.637681 |  |  |  |  |
|  | 5.227536 |  |  |  |  |
|  | 5.314493 |  |  |  |  |
|  | 5.65942  |  |  |  |  |
|  | 8.908696 |  |  |  |  |
|  | 4.747826 |  |  |  |  |
|  | 2.66087  |  |  |  |  |
|  | 6.292754 |  |  |  |  |
|  | 3.9      |  |  |  |  |
|  | 4.843478 |  |  |  |  |
|  | 5.346377 |  |  |  |  |
|  | 4.091304 |  |  |  |  |
|  | 5.431884 |  |  |  |  |
|  | 4.85942  |  |  |  |  |
|  | 2.67971  |  |  |  |  |
|  | 5.447826 |  |  |  |  |
|  | 6.04058  |  |  |  |  |
|  | 4.018841 |  |  |  |  |
|  | 3.850725 |  |  |  |  |
|  | 1.449275 |  |  |  |  |
|  | 1.336232 |  |  |  |  |
|  | 1.246377 |  |  |  |  |
|  | 1.949275 |  |  |  |  |
|  | 1.56087  |  |  |  |  |
|  | 3.191304 |  |  |  |  |
|  | 2.798551 |  |  |  |  |
|  | 2.45942  |  |  |  |  |
|  | 5.508696 |  |  |  |  |
|  | 5.446377 |  |  |  |  |
|  | 6.649275 |  |  |  |  |
|  | 4.465217 |  |  |  |  |
|  | 1.492754 |  |  |  |  |

|  |          |  |  |  |  |
|--|----------|--|--|--|--|
|  | 1.601449 |  |  |  |  |
|  | 3.346377 |  |  |  |  |
|  | 1.295652 |  |  |  |  |
|  | 1.168116 |  |  |  |  |
|  | 4.17971  |  |  |  |  |
|  | 6.872464 |  |  |  |  |
|  | 4.550725 |  |  |  |  |
|  | 5.913043 |  |  |  |  |
|  | 5.717391 |  |  |  |  |
|  | 5.549275 |  |  |  |  |
|  | 2.898551 |  |  |  |  |
|  | 0.915942 |  |  |  |  |
|  | 5.508696 |  |  |  |  |
|  | 8.726087 |  |  |  |  |
|  | 5.828986 |  |  |  |  |
|  | 5.127536 |  |  |  |  |
|  | 6.471014 |  |  |  |  |
|  | 2.723188 |  |  |  |  |
|  | 4.927536 |  |  |  |  |
|  | 2.35942  |  |  |  |  |
|  | 2.476812 |  |  |  |  |
|  | 8.081159 |  |  |  |  |
|  | 2.336232 |  |  |  |  |
|  | 3.436232 |  |  |  |  |
|  | 3.489855 |  |  |  |  |
|  | 3.804348 |  |  |  |  |
|  | 6.271014 |  |  |  |  |
|  | 5.771014 |  |  |  |  |

**Fig 5 data:**

| <b>wavelength</b> | <b>absorbance</b> | <b>absorbance</b> | <b>absorbance</b> |
|-------------------|-------------------|-------------------|-------------------|
| <b>(nm)</b>       | <b>(a.u)</b>      | <b>(a.u)</b>      | <b>(a.u)</b>      |
|                   | 2%                | 3%                | 4%                |
| 355               | 0.15079           | 0.18944           | 0.27487           |
| 356               | 0.15342           | 0.19112           | 0.27766           |
| 357               | 0.15612           | 0.19264           | 0.28025           |
| 358               | 0.15865           | 0.19384           | 0.28264           |
| 359               | 0.16137           | 0.1948            | 0.28487           |
| 360               | 0.1639            | 0.19576           | 0.28695           |
| 361               | 0.16626           | 0.19696           | 0.2889            |
| 362               | 0.16883           | 0.19824           | 0.29073           |
| 363               | 0.17131           | 0.19952           | 0.29247           |
| 364               | 0.17399           | 0.20072           | 0.29412           |
| 365               | 0.1763            | 0.20216           | 0.2957            |
| 366               | 0.17852           | 0.20392           | 0.29723           |
| 367               | 0.18066           | 0.20576           | 0.29871           |
| 368               | 0.18334           | 0.20768           | 0.30015           |
| 369               | 0.18656           | 0.2096            | 0.30157           |
| 370               | 0.18989           | 0.21184           | 0.30297           |
| 371               | 0.19256           | 0.21408           | 0.30437           |
| 372               | 0.19509           | 0.21632           | 0.30576           |
| 373               | 0.19783           | 0.2188            | 0.30716           |
| 374               | 0.20092           | 0.2216            | 0.30858           |
| 375               | 0.20416           | 0.22472           | 0.31001           |
| 376               | 0.20682           | 0.228             | 0.31147           |
| 377               | 0.20974           | 0.23144           | 0.31295           |
| 378               | 0.21239           | 0.23472           | 0.31446           |
| 379               | 0.21563           | 0.23816           | 0.316             |
| 380               | 0.21853           | 0.2416            | 0.31757           |
| 381               | 0.22164           | 0.24504           | 0.31918           |
| 382               | 0.22475           | 0.24816           | 0.32083           |
| 383               | 0.22807           | 0.25168           | 0.32251           |
| 384               | 0.23147           | 0.2552            | 0.32422           |
| 385               | 0.23505           | 0.25896           | 0.32597           |
| 386               | 0.2389            | 0.26288           | 0.32776           |
| 387               | 0.2427            | 0.2668            | 0.32957           |
| 388               | 0.24654           | 0.27048           | 0.33141           |
| 389               | 0.25028           | 0.27384           | 0.33328           |
| 390               | 0.25404           | 0.27696           | 0.33517           |
| 391               | 0.2578            | 0.28008           | 0.33707           |

|     |         |         |         |
|-----|---------|---------|---------|
| 392 | 0.26181 | 0.28352 | 0.339   |
| 393 | 0.26585 | 0.28688 | 0.34093 |
| 394 | 0.26981 | 0.29016 | 0.34288 |
| 395 | 0.27363 | 0.29352 | 0.34482 |
| 396 | 0.27752 | 0.29712 | 0.34676 |
| 397 | 0.28123 | 0.30064 | 0.34869 |
| 398 | 0.28503 | 0.30384 | 0.35061 |
| 399 | 0.28851 | 0.30688 | 0.35252 |
| 400 | 0.29212 | 0.30992 | 0.35439 |
| 401 | 0.2954  | 0.31296 | 0.35624 |
| 402 | 0.2989  | 0.31592 | 0.35805 |
| 403 | 0.30227 | 0.31904 | 0.35982 |
| 404 | 0.30551 | 0.322   | 0.36154 |
| 405 | 0.30875 | 0.32472 | 0.36321 |
| 406 | 0.31199 | 0.32744 | 0.36438 |
| 407 | 0.31517 | 0.32992 | 0.3658  |
| 408 | 0.31808 | 0.33232 | 0.36725 |
| 409 | 0.32098 | 0.33464 | 0.3687  |
| 410 | 0.32378 | 0.33712 | 0.37    |
| 411 | 0.32664 | 0.33976 | 0.37112 |
| 412 | 0.32916 | 0.34216 | 0.37237 |
| 413 | 0.3316  | 0.34472 | 0.37337 |
| 414 | 0.334   | 0.34696 | 0.37401 |
| 415 | 0.33627 | 0.34904 | 0.37453 |
| 416 | 0.3386  | 0.35112 | 0.37495 |
| 417 | 0.34078 | 0.35328 | 0.37527 |
| 418 | 0.34294 | 0.35544 | 0.37576 |
| 419 | 0.34493 | 0.35768 | 0.37622 |
| 420 | 0.34683 | 0.35928 | 0.37662 |
| 421 | 0.34852 | 0.36072 | 0.37663 |
| 422 | 0.35003 | 0.36176 | 0.37651 |
| 423 | 0.35132 | 0.3628  | 0.37606 |
| 424 | 0.35251 | 0.36408 | 0.3758  |
| 425 | 0.35364 | 0.36528 | 0.3755  |
| 426 | 0.35487 | 0.36648 | 0.37531 |
| 427 | 0.35618 | 0.36752 | 0.37485 |
| 428 | 0.35711 | 0.36848 | 0.37432 |
| 429 | 0.35802 | 0.3688  | 0.37368 |
| 430 | 0.35891 | 0.36888 | 0.37269 |
| 431 | 0.35979 | 0.36856 | 0.37159 |
| 432 | 0.36055 | 0.36832 | 0.3702  |

|     |         |         |         |
|-----|---------|---------|---------|
| 433 | 0.3612  | 0.36784 | 0.36889 |
| 434 | 0.36171 | 0.36744 | 0.36762 |
| 435 | 0.36206 | 0.36672 | 0.36582 |
| 436 | 0.36232 | 0.36608 | 0.36387 |
| 437 | 0.36247 | 0.36544 | 0.36161 |
| 438 | 0.36253 | 0.36456 | 0.35942 |
| 439 | 0.36236 | 0.36344 | 0.35678 |
| 440 | 0.36208 | 0.36232 | 0.35412 |
| 441 | 0.36182 | 0.36104 | 0.35107 |
| 442 | 0.3615  | 0.35992 | 0.34801 |
| 443 | 0.361   | 0.3584  | 0.34493 |
| 444 | 0.36024 | 0.35656 | 0.34185 |
| 445 | 0.35947 | 0.35472 | 0.33859 |
| 446 | 0.35888 | 0.35296 | 0.33539 |
| 447 | 0.35839 | 0.3512  | 0.33203 |
| 448 | 0.35778 | 0.34936 | 0.32868 |
| 449 | 0.35713 | 0.34768 | 0.32549 |
| 450 | 0.35627 | 0.34576 | 0.32228 |
| 451 | 0.35523 | 0.34368 | 0.31889 |
| 452 | 0.35398 | 0.3416  | 0.31555 |
| 453 | 0.35251 | 0.3396  | 0.31189 |
| 454 | 0.351   | 0.33768 | 0.30862 |
| 455 | 0.34947 | 0.33584 | 0.30499 |
| 456 | 0.34787 | 0.33336 | 0.30161 |
| 457 | 0.34616 | 0.33032 | 0.29794 |
| 458 | 0.34424 | 0.32704 | 0.29457 |
| 459 | 0.3423  | 0.32408 | 0.2911  |
| 460 | 0.34009 | 0.32128 | 0.28752 |
| 461 | 0.33795 | 0.31848 | 0.2842  |
| 462 | 0.33569 | 0.31576 | 0.28095 |
| 463 | 0.33344 | 0.31296 | 0.27776 |
| 464 | 0.33102 | 0.31032 | 0.27464 |
| 465 | 0.32856 | 0.30752 | 0.27123 |
| 466 | 0.32603 | 0.30512 | 0.2679  |
| 467 | 0.32363 | 0.30232 | 0.26422 |
| 468 | 0.32113 | 0.29984 | 0.26107 |
| 469 | 0.31851 | 0.2972  | 0.25799 |
| 470 | 0.31575 | 0.29472 | 0.25507 |
| 471 | 0.31283 | 0.292   | 0.25199 |
| 472 | 0.31    | 0.28944 | 0.24912 |
| 473 | 0.30707 | 0.2872  | 0.24602 |

|     |         |         |         |
|-----|---------|---------|---------|
| 474 | 0.30408 | 0.28528 | 0.243   |
| 475 | 0.30093 | 0.28368 | 0.2404  |
| 476 | 0.29778 | 0.28192 | 0.23827 |
| 477 | 0.2946  | 0.28016 | 0.23645 |
| 478 | 0.29134 | 0.27824 | 0.23415 |
| 479 | 0.28795 | 0.27664 | 0.23145 |
| 480 | 0.28454 | 0.2748  | 0.22888 |
| 481 | 0.28119 | 0.27272 | 0.22629 |
| 482 | 0.27791 | 0.27096 | 0.22378 |
| 483 | 0.27456 | 0.26984 | 0.22137 |
| 484 | 0.27117 | 0.26872 | 0.2194  |
| 485 | 0.26775 | 0.26768 | 0.21724 |
| 486 | 0.26434 | 0.26624 | 0.21485 |
| 487 | 0.26093 | 0.26448 | 0.21264 |
| 488 | 0.25754 | 0.26248 | 0.21085 |
| 489 | 0.25419 | 0.26048 | 0.20914 |
| 490 | 0.25084 | 0.25896 | 0.20712 |
| 491 | 0.24747 | 0.25752 | 0.20551 |
| 492 | 0.24417 | 0.2564  | 0.20392 |
| 493 | 0.24086 | 0.25488 | 0.20256 |
| 494 | 0.23756 | 0.2532  | 0.20124 |
| 495 | 0.23438 | 0.25184 | 0.19978 |
| 496 | 0.23112 | 0.2504  | 0.19855 |
| 497 | 0.2279  | 0.24856 | 0.19714 |
| 498 | 0.22468 | 0.24648 | 0.19629 |
| 499 | 0.22146 | 0.24456 | 0.19486 |
| 500 | 0.21833 | 0.24272 | 0.19314 |
| 501 | 0.21522 | 0.24088 | 0.19116 |
| 502 | 0.21228 | 0.23896 | 0.18935 |
| 503 | 0.20946 | 0.23696 | 0.18772 |
| 504 | 0.20663 | 0.23448 | 0.18608 |
| 505 | 0.20375 | 0.23192 | 0.18476 |
| 506 | 0.20092 | 0.22936 | 0.18359 |
| 507 | 0.19818 | 0.2268  | 0.18259 |
| 508 | 0.1955  | 0.22456 | 0.18137 |
| 509 | 0.19282 | 0.2224  | 0.18007 |
| 510 | 0.1901  | 0.2204  | 0.17851 |
| 511 | 0.18744 | 0.21824 | 0.17708 |
| 512 | 0.18477 | 0.21584 | 0.17575 |
| 513 | 0.18226 | 0.21328 | 0.17423 |
| 514 | 0.17976 | 0.21064 | 0.17283 |

|     |         |         |         |
|-----|---------|---------|---------|
| 515 | 0.17736 | 0.20824 | 0.17142 |
| 516 | 0.17505 | 0.20632 | 0.16994 |
| 517 | 0.17276 | 0.20432 | 0.16846 |
| 518 | 0.17038 | 0.20248 | 0.16719 |
| 519 | 0.16803 | 0.20056 | 0.16555 |
| 520 | 0.16574 | 0.1984  | 0.16419 |
| 521 | 0.16353 | 0.19648 | 0.16253 |
| 522 | 0.16135 | 0.19456 | 0.16135 |
| 523 | 0.15921 | 0.19304 | 0.16016 |
| 524 | 0.15708 | 0.1916  | 0.15939 |
| 525 | 0.15496 | 0.19008 | 0.15846 |
| 526 | 0.15297 | 0.18848 | 0.15769 |
| 527 | 0.15103 | 0.18664 | 0.1565  |
| 528 | 0.14906 | 0.18496 | 0.15547 |
| 529 | 0.1472  | 0.18344 | 0.15445 |
| 530 | 0.14535 | 0.18224 | 0.15321 |
| 531 | 0.14351 | 0.18088 | 0.15196 |
| 532 | 0.14165 | 0.17992 | 0.15073 |
| 533 | 0.13977 | 0.17872 | 0.14974 |
| 534 | 0.13789 | 0.17768 | 0.14875 |
| 535 | 0.13608 | 0.17648 | 0.14734 |
| 536 | 0.13431 | 0.17544 | 0.14591 |
| 537 | 0.13258 | 0.17448 | 0.14465 |
| 538 | 0.13085 | 0.17336 | 0.14354 |
| 539 | 0.1291  | 0.17208 | 0.1422  |
| 540 | 0.12744 | 0.17112 | 0.14086 |
| 541 | 0.12578 | 0.17016 | 0.13978 |
| 542 | 0.12416 | 0.1692  | 0.1391  |
| 543 | 0.12258 | 0.16768 | 0.13844 |
| 544 | 0.12107 | 0.16664 | 0.13763 |
| 545 | 0.11949 | 0.1656  | 0.13671 |
| 546 | 0.11794 | 0.16456 | 0.13592 |
| 547 | 0.11634 | 0.16352 | 0.1353  |
| 548 | 0.11474 | 0.16232 | 0.13484 |
| 549 | 0.11316 | 0.16128 | 0.13467 |
| 550 | 0.11152 | 0.16024 | 0.13451 |
| 551 | 0.1099  | 0.15896 | 0.13447 |
| 552 | 0.10828 | 0.15784 | 0.1347  |
| 553 | 0.10668 | 0.15672 | 0.13449 |
| 554 | 0.10513 | 0.1556  | 0.13448 |
| 555 | 0.10357 | 0.15416 | 0.13408 |

|     |         |         |         |
|-----|---------|---------|---------|
| 556 | 0.10202 | 0.15272 | 0.13402 |
| 557 | 0.10042 | 0.15152 | 0.1339  |
| 558 | 0.09876 | 0.15024 | 0.13411 |
| 559 | 0.09703 | 0.14896 | 0.13411 |
| 560 | 0.09526 | 0.14784 | 0.13406 |
| 561 | 0.09351 | 0.14664 | 0.13416 |
| 562 | 0.09186 | 0.1456  | 0.13387 |
| 563 | 0.09031 | 0.14408 | 0.13341 |
| 564 | 0.08867 | 0.14256 | 0.13296 |
| 565 | 0.08703 | 0.14104 | 0.13267 |
| 566 | 0.08534 | 0.13976 | 0.13269 |
| 567 | 0.08366 | 0.13824 | 0.13247 |
| 568 | 0.08199 | 0.13664 | 0.13239 |
| 569 | 0.0804  | 0.13448 | 0.13201 |
| 570 | 0.0788  | 0.13224 | 0.13202 |
| 571 | 0.07713 | 0.13    | 0.13172 |
| 572 | 0.07556 | 0.12808 | 0.13176 |
| 573 | 0.07389 | 0.12648 | 0.13177 |
| 574 | 0.07225 | 0.12496 | 0.1316  |
| 575 | 0.07057 | 0.12312 | 0.13146 |
| 576 | 0.06901 | 0.12104 | 0.13081 |
| 577 | 0.06739 | 0.11904 | 0.13039 |
| 578 | 0.06577 | 0.1172  | 0.1296  |
| 579 | 0.06422 | 0.11536 | 0.12918 |
| 580 | 0.06288 | 0.1136  | 0.12856 |
| 581 | 0.06156 | 0.11184 | 0.12812 |
| 582 | 0.06022 | 0.11024 | 0.12767 |
| 583 | 0.05875 | 0.10864 | 0.1278  |
| 584 | 0.05737 | 0.10712 | 0.12759 |
| 585 | 0.05603 | 0.10592 | 0.12741 |
| 586 | 0.05478 | 0.10448 | 0.12652 |
| 587 | 0.05346 | 0.10296 | 0.1261  |
| 588 | 0.0521  | 0.10144 | 0.12577 |
| 589 | 0.0508  | 0.1     | 0.12582 |
| 590 | 0.04957 | 0.09912 | 0.12568 |
| 591 | 0.04836 | 0.09792 | 0.1259  |
| 592 | 0.04724 | 0.09672 | 0.12559 |
| 593 | 0.04616 | 0.09536 | 0.12564 |
| 594 | 0.04497 | 0.0944  | 0.12513 |
| 595 | 0.04383 | 0.0936  | 0.125   |
| 596 | 0.04257 | 0.09256 | 0.12486 |



|     |         |         |         |
|-----|---------|---------|---------|
| 597 | 0.04154 | 0.09136 | 0.12504 |
| 598 | 0.0405  | 0.09056 | 0.12477 |
| 599 | 0.03944 | 0.08952 | 0.12427 |
| 600 | 0.03838 | 0.08832 | 0.12373 |
| 601 | 0.03735 | 0.08736 | 0.12319 |
| 602 | 0.03629 | 0.08632 | 0.12289 |
| 603 | 0.03521 | 0.08528 | 0.12288 |
| 604 | 0.03415 | 0.08416 | 0.1231  |
| 605 | 0.03318 | 0.08328 | 0.12335 |
| 606 | 0.03227 | 0.08216 | 0.12342 |
| 607 | 0.03138 | 0.08136 | 0.12347 |
| 608 | 0.0305  | 0.0804  | 0.1235  |
| 609 | 0.02966 | 0.07944 | 0.1235  |
| 610 | 0.02886 | 0.07792 | 0.12365 |
| 611 | 0.02802 | 0.07656 | 0.12362 |
| 612 | 0.02719 | 0.07528 | 0.12368 |
| 613 | 0.0264  | 0.07384 | 0.12362 |
| 614 | 0.02557 | 0.07272 | 0.12354 |
| 615 | 0.02478 | 0.07176 | 0.12303 |
| 616 | 0.02406 | 0.0708  | 0.12264 |
| 617 | 0.02339 | 0.06984 | 0.1221  |
| 618 | 0.02264 | 0.06888 | 0.12188 |
| 619 | 0.0219  | 0.06768 | 0.12174 |
| 620 | 0.0211  | 0.0664  | 0.12186 |
| 621 | 0.02039 | 0.06504 | 0.1218  |
| 622 | 0.01979 | 0.0636  | 0.12173 |
| 623 | 0.01927 | 0.06232 | 0.12146 |
| 624 | 0.01868 | 0.06088 | 0.12137 |
| 625 | 0.01801 | 0.05976 | 0.12141 |
| 626 | 0.01724 | 0.0588  | 0.12146 |
| 627 | 0.01639 | 0.05776 | 0.1208  |
| 628 | 0.01562 | 0.05712 | 0.11988 |
| 629 | 0.01493 | 0.0564  | 0.11879 |
| 630 | 0.01421 | 0.056   | 0.11788 |
| 631 | 0.01337 | 0.0552  | 0.11694 |
| 632 | 0.01253 | 0.05464 | 0.11663 |
| 633 | 0.01177 | 0.0536  | 0.11616 |
| 634 | 0.01128 | 0.0528  | 0.11555 |
| 635 | 0.01074 | 0.05216 | 0.11459 |
| 636 | 0.01015 | 0.05144 | 0.11364 |
| 637 | 0.00944 | 0.05096 | 0.11294 |

|     |          |         |         |
|-----|----------|---------|---------|
| 638 | 0.00873  | 0.05024 | 0.11157 |
| 639 | 0.0081   | 0.0496  | 0.11014 |
| 640 | 0.00747  | 0.04888 | 0.10832 |
| 641 | 0.00683  | 0.04856 | 0.10679 |
| 642 | 0.00622  | 0.04784 | 0.10488 |
| 643 | 0.00559  | 0.04688 | 0.10313 |
| 644 | 0.00497  | 0.04608 | 0.10162 |
| 645 | 0.00428  | 0.04584 | 0.10081 |
| 646 | 0.00372  | 0.0456  | 0.09982 |
| 647 | 0.00309  | 0.04508 | 0.09943 |
| 648 | 0.00255  | 0.04446 | 0.09892 |
| 649 | 0.00195  | 0.04397 | 0.09885 |
| 650 | 0.00143  | 0.044   | 0.09828 |
| 651 | 9.22E-04 | 0.04379 | 0.09776 |
| 652 | 5.29E-04 | 0.04398 | 0.09654 |
| 653 | 1.20E-04 | 0.04408 | 0.0952  |
| 654 | 5.25E-04 | 0.0441  | 0.09415 |
| 655 | 0.00108  | 0.04419 | 0.0936  |
| 656 | 0.00172  | 0.04437 | 0.09312 |
| 657 | 0.00225  | 0.04507 | 0.09271 |
| 658 | 0.00279  | 0.0456  | 0.09247 |
| 659 | 0.0033   | 0.04574 | 0.092   |
| 660 | 0.00372  | 0.04648 | 0.09166 |
| 661 | 0.00419  | 0.04736 | 0.09141 |
| 662 | 0.00451  | 0.04768 | 0.09072 |
| 663 | 0.0049   | 0.048   | 0.08991 |
| 664 | 0.00527  | 0.0484  | 0.08929 |
| 665 | 0.00572  | 0.04864 | 0.08905 |
| 666 | 0.00616  | 0.04912 | 0.08895 |
| 667 | 0.00659  | 0.04944 | 0.08838 |
| 668 | 0.00698  | 0.0496  | 0.08797 |
| 669 | 0.00737  | 0.05    | 0.08786 |
| 670 | 0.00773  | 0.0504  | 0.08746 |
| 671 | 0.00816  | 0.05144 | 0.08674 |
| 672 | 0.00832  | 0.05344 | 0.08626 |
| 673 | 0.00838  | 0.05568 | 0.08615 |
| 674 | 0.00812  | 0.05736 | 0.08592 |
| 675 | 0.00804  | 0.05872 | 0.08528 |
| 676 | 0.00799  | 0.06    | 0.08435 |
| 677 | 0.00832  | 0.06096 | 0.08524 |
| 678 | 0.00879  | 0.06128 | 0.08589 |

|     |         |         |         |
|-----|---------|---------|---------|
| 679 | 0.00916 | 0.06208 | 0.08663 |
| 680 | 0.00948 | 0.06264 | 0.08561 |
| 681 | 0.00961 | 0.06288 | 0.08424 |
| 682 | 0.01013 | 0.06256 | 0.0828  |
| 683 | 0.01093 | 0.06224 | 0.08231 |
| 684 | 0.01166 | 0.06208 | 0.08263 |
| 685 | 0.0124  | 0.06216 | 0.08304 |
| 686 | 0.01294 | 0.06168 | 0.08236 |
| 687 | 0.01354 | 0.0608  | 0.08271 |
| 688 | 0.014   | 0.06008 | 0.08217 |
| 689 | 0.01439 | 0.0596  | 0.08256 |
| 690 | 0.01482 | 0.05904 | 0.08176 |
| 691 | 0.0151  | 0.05864 | 0.08146 |
| 692 | 0.01518 | 0.05808 | 0.08021 |
| 693 | 0.01534 | 0.0576  | 0.0791  |
| 694 | 0.01555 | 0.0572  | 0.07811 |
| 695 | 0.01575 | 0.05672 | 0.07759 |
| 696 | 0.01575 | 0.05608 | 0.07682 |
| 697 | 0.01566 | 0.05552 | 0.07648 |
| 698 | 0.01575 | 0.05552 | 0.07586 |
| 699 | 0.01583 | 0.0556  | 0.07646 |
| 700 | 0.01572 | 0.05552 | 0.07621 |
| 701 | 0.01542 | 0.0552  | 0.07663 |
| 702 | 0.01514 | 0.05448 | 0.07609 |
| 703 | 0.01495 | 0.05352 | 0.07614 |
| 704 | 0.01488 | 0.05328 | 0.07502 |
| 705 | 0.01462 | 0.05232 | 0.07389 |
| 706 | 0.01441 | 0.05136 | 0.07141 |
| 707 | 0.01395 | 0.05208 | 0.0694  |
| 708 | 0.01341 | 0.05128 | 0.06745 |
| 709 | 0.01268 | 0.05008 | 0.06703 |
| 710 | 0.0119  | 0.04928 | 0.06611 |
| 711 | 0.01119 | 0.04872 | 0.06458 |
| 712 | 0.01063 | 0.04792 | 0.06327 |
| 713 | 0.00998 | 0.04736 | 0.06237 |
| 714 | 0.00916 | 0.04792 | 0.06146 |
| 715 | 0.00827 | 0.04768 | 0.05998 |
| 716 | 0.00726 | 0.04736 | 0.0592  |
| 717 | 0.00667 | 0.04768 | 0.05914 |
| 718 | 0.00622 | 0.04736 | 0.05918 |
| 719 | 0.00581 | 0.0468  | 0.0592  |

|     |          |         |         |
|-----|----------|---------|---------|
| 720 | 0.00531  | 0.04648 | 0.05768 |
| 721 | 0.00456  | 0.0464  | 0.05692 |
| 722 | 0.00404  | 0.04656 | 0.05555 |
| 723 | 0.00348  | 0.04688 | 0.05471 |
| 724 | 0.00337  | 0.04752 | 0.053   |
| 725 | 0.0032   | 0.0488  | 0.0515  |
| 726 | 0.00294  | 0.0492  | 0.04992 |
| 727 | 0.0022   | 0.04976 | 0.04767 |
| 728 | 0.00138  | 0.05104 | 0.04528 |
| 729 | 6.13E-04 | 0.05248 | 0.04335 |
| 730 | 1.24E-05 | 0.05432 | 0.04295 |
| 731 | 6.42E-04 | 0.05488 | 0.04329 |
| 732 | 0.00151  | 0.05584 | 0.04383 |
| 733 | 0.00218  | 0.05688 | 0.04359 |
| 734 | 0.00274  | 0.05864 | 0.04357 |
| 735 | 0.00279  | 0.05976 | 0.04384 |
| 736 | 0.00281  | 0.06032 | 0.04394 |
| 737 | 0.00266  | 0.06064 | 0.04366 |
| 738 | 0.00264  | 0.0612  | 0.04283 |
| 739 | 0.00276  | 0.06176 | 0.04187 |
| 740 | 0.00287  | 0.06208 | 0.04037 |
| 741 | 0.00296  | 0.06248 | 0.03886 |
| 742 | 0.00276  | 0.06248 | 0.03748 |
| 743 | 0.00257  | 0.0632  | 0.03657 |
| 744 | 0.00222  | 0.0636  | 0.03597 |
| 745 | 0.00206  | 0.06512 | 0.03509 |
| 746 | 0.0018   | 0.06552 | 0.03484 |
| 747 | 0.00147  | 0.06584 | 0.03455 |
| 748 | 9.99E-04 | 0.06552 | 0.03421 |
| 749 | 6.55E-04 | 0.06616 | 0.0333  |
| 750 | 4.62E-04 | 0.06688 | 0.03239 |
| 751 | 2.95E-04 | 0.06704 | 0.03195 |
| 752 | 8.64E-05 | 0.0668  | 0.03091 |
| 753 | 4.87E-04 | 0.06648 | 0.03066 |
| 754 | 0.00107  | 0.06616 | 0.03032 |
| 755 | 0.00166  | 0.06584 | 0.03065 |
| 756 | 0.00225  | 0.06552 | 0.03011 |
| 757 | 0.00285  | 0.06512 | 0.02958 |
| 758 | 0.00343  | 0.0648  | 0.02908 |
| 759 | 0.004    | 0.06448 | 0.0286  |
| 760 | 0.00456  | 0.06416 | 0.02816 |

|     |         |         |         |
|-----|---------|---------|---------|
| 761 | 0.00508 | 0.06392 | 0.02774 |
| 762 | 0.00559 | 0.0636  | 0.02736 |
| 763 | 0.00609 | 0.06344 | 0.02702 |
| 764 | 0.00654 | 0.06328 | 0.02671 |
| 765 | 0.00698 | 0.06312 | 0.02645 |
| 766 | 0.00737 | 0.06312 | 0.02623 |
| 767 | 0.00773 | 0.06312 | 0.02605 |
| 768 | 0.00804 | 0.06312 | 0.02592 |
| 769 | 0.00834 | 0.06328 | 0.02584 |
| 770 | 0.00858 | 0.06352 | 0.02581 |
| 771 | 0.00877 | 0.06376 | 0.02583 |
| 772 | 0.00894 | 0.06408 | 0.0259  |
| 773 | 0.00907 | 0.06448 | 0.02602 |
| 774 | 0.00916 | 0.06496 | 0.02619 |
| 775 | 0.00922 | 0.06552 | 0.02642 |
| 776 | 0.00924 | 0.06608 | 0.0267  |
| 777 | 0.00924 | 0.06672 | 0.02702 |
| 778 | 0.00922 | 0.06744 | 0.0274  |
| 779 | 0.00918 | 0.06824 | 0.02783 |
| 780 | 0.00912 | 0.06904 | 0.0283  |
| 781 | 0.00905 | 0.06984 | 0.02882 |
| 782 | 0.00899 | 0.07072 | 0.02938 |
| 783 | 0.00892 | 0.07152 | 0.02997 |
| 784 | 0.00888 | 0.0724  | 0.03061 |
| 785 | 0.00886 | 0.0732  | 0.03127 |
| 786 | 0.00888 | 0.074   | 0.03195 |
| 787 | 0.00894 | 0.0748  | 0.03266 |
| 788 | 0.00907 | 0.07544 | 0.03338 |
| 789 | 0.00927 | 0.076   | 0.03411 |
| 790 | 0.00955 | 0.07648 | 0.03484 |
| 791 | 0.00996 | 0.0768  | 0.03557 |
| 792 | 0.01045 | 0.07696 | 0.03627 |
| 793 | 0.0111  | 0.07696 | 0.03696 |
| 794 | 0.01192 | 0.07664 | 0.03761 |
| 795 | 0.0129  | 0.07616 | 0.03822 |
| 796 | 0.01408 | 0.07528 | 0.03877 |
| 797 | 0.01547 | 0.07416 | 0.03926 |
| 798 | 0.01713 | 0.07264 | 0.03967 |
| 799 | 0.01903 | 0.07072 | 0.03998 |
| 800 | 0.02123 | 0.0684  | 0.04019 |
| 801 | 0.02376 | 0.06552 | 0.04028 |

**Fig 6 data:**

| <i>hν</i> | $(ahν)^2$            | $(ahν)^2$            | $(ahν)^2$            |
|-----------|----------------------|----------------------|----------------------|
| eV        | (eV/cm) <sup>2</sup> | (eV/cm) <sup>2</sup> | (eV/cm) <sup>2</sup> |
|           | 2%                   | 3%                   | 4%                   |
| 5.64722   | 4851.35009           | 4950.72427           | 4123.55953           |
| 5.63441   | 4831.42739           | 4928.82449           | 4109.61265           |
| 5.62167   | 4811.29151           | 4906.75433           | 4095.43248           |
| 5.60898   | 4790.94026           | 4884.51396           | 4081.01017           |
| 5.59634   | 4770.37176           | 4862.10377           | 4066.33727           |
| 5.58377   | 4749.58447           | 4839.52444           | 4051.40584           |
| 5.57125   | 4728.57719           | 4816.77686           | 4036.2084            |
| 5.55878   | 4707.34904           | 4793.86217           | 4020.73804           |
| 5.54638   | 4685.8995            | 4770.78174           | 4004.98836           |
| 5.53402   | 4664.22838           | 4747.53721           | 3988.95357           |
| 5.52172   | 4642.33586           | 4724.1304            | 3972.62844           |
| 5.50948   | 4620.22245           | 4700.5634            | 3956.00838           |
| 5.49729   | 4597.88902           | 4676.83849           | 3939.08943           |
| 5.48516   | 4575.3368            | 4652.9582            | 3921.86827           |
| 5.47308   | 4552.56736           | 4628.92527           | 3904.34225           |
| 5.46105   | 4529.58262           | 4604.74262           | 3886.50938           |
| 5.44907   | 4506.38487           | 4580.41342           | 3868.36838           |
| 5.43715   | 4482.97674           | 4555.94103           | 3849.91866           |
| 5.42528   | 4459.36118           | 4531.32898           | 3831.16031           |
| 5.41346   | 4435.54153           | 4506.58103           | 3812.09414           |
| 5.40169   | 4411.52144           | 4481.70112           | 3792.72168           |
| 5.38997   | 4387.3049            | 4456.69335           | 3773.04513           |
| 5.3783    | 4362.89622           | 4431.56202           | 3753.06743           |
| 5.36669   | 4338.30006           | 4406.31159           | 3732.79221           |
| 5.35512   | 4313.52139           | 4380.94671           | 3712.22378           |
| 5.3436    | 4288.56547           | 4355.47216           | 3691.36715           |

|         |            |            |            |
|---------|------------|------------|------------|
| 5.33214 | 4263.4379  | 4329.8929  | 3670.228   |
| 5.32072 | 4238.14454 | 4304.21403 | 3648.81266 |
| 5.30935 | 4212.69156 | 4278.44081 | 3627.12813 |
| 5.29803 | 4187.08541 | 4252.57862 | 3605.18203 |
| 5.28676 | 4161.3328  | 4226.63298 | 3582.98257 |
| 5.27553 | 4135.4407  | 4200.60956 | 3560.53859 |
| 5.26436 | 4109.41634 | 4174.51412 | 3537.85945 |
| 5.25323 | 4083.26718 | 4148.35258 | 3514.9551  |
| 5.24214 | 4057.0009  | 4122.13092 | 3491.83599 |
| 5.23111 | 4030.62539 | 4095.85527 | 3468.51304 |
| 5.22012 | 4004.14878 | 4069.53185 | 3444.99768 |
| 5.20917 | 3977.57934 | 4043.16696 | 3421.30172 |
| 5.19828 | 3950.92555 | 4016.767   | 3397.43741 |
| 5.18742 | 3924.19605 | 3990.33846 | 3373.41735 |
| 5.17662 | 3897.39961 | 3963.88789 | 3349.25448 |
| 5.16585 | 3870.54515 | 3937.42192 | 3324.96204 |
| 5.15514 | 3843.64172 | 3910.94724 | 3300.55355 |
| 5.14446 | 3816.69847 | 3884.47061 | 3276.04273 |
| 5.13383 | 3789.72463 | 3857.99884 | 3251.44353 |
| 5.12325 | 3762.72953 | 3831.53876 | 3226.77003 |
| 5.11271 | 3735.72256 | 3805.09727 | 3202.03644 |
| 5.10221 | 3708.71315 | 3778.68128 | 3177.25707 |
| 5.09175 | 3681.71077 | 3752.29775 | 3152.44624 |
| 5.08134 | 3654.7249  | 3725.95363 | 3127.61831 |
| 5.07097 | 3627.76504 | 3699.65589 | 3102.7876  |
| 5.06064 | 3600.84068 | 3673.41152 | 3077.96838 |
| 5.05036 | 3573.96126 | 3647.22748 | 3053.1748  |
| 5.04011 | 3547.13621 | 3621.11075 | 3028.42089 |
| 5.02991 | 3520.37489 | 3595.06826 | 3003.72051 |
| 5.01975 | 3493.6866  | 3569.10694 | 2979.0873  |

|         |            |            |            |
|---------|------------|------------|------------|
| 5.00963 | 3467.08053 | 3543.23367 | 2954.53468 |
| 4.99955 | 3440.56581 | 3517.45529 | 2930.0758  |
| 4.98951 | 3414.15143 | 3491.7786  | 2905.72351 |
| 4.97951 | 3387.84628 | 3466.21033 | 2881.49033 |
| 4.96955 | 3361.65908 | 3440.75716 | 2857.38842 |
| 4.95963 | 3335.59843 | 3415.42567 | 2833.42957 |
| 4.94975 | 3309.67275 | 3390.22239 | 2809.62515 |
| 4.93991 | 3283.89029 | 3365.15373 | 2785.98611 |
| 4.93011 | 3258.2591  | 3340.22602 | 2762.52293 |
| 4.92035 | 3232.78704 | 3315.44547 | 2739.24563 |
| 4.91062 | 3207.48177 | 3290.81818 | 2716.16373 |
| 4.90094 | 3182.35071 | 3266.35012 | 2693.28625 |
| 4.89129 | 3157.40105 | 3242.04712 | 2670.62168 |
| 4.88168 | 3132.63975 | 3217.91489 | 2648.17797 |
| 4.87211 | 3108.07351 | 3193.95897 | 2625.96253 |
| 4.86258 | 3083.70879 | 3170.18474 | 2603.98221 |
| 4.85308 | 3059.55176 | 3146.59743 | 2582.24331 |
| 4.84362 | 3035.60832 | 3123.20207 | 2560.75153 |
| 4.83419 | 3011.88411 | 3100.00352 | 2539.51203 |
| 4.82481 | 2988.38445 | 3077.00644 | 2518.52937 |
| 4.81546 | 2965.11439 | 3054.21531 | 2497.80756 |
| 4.80614 | 2942.07868 | 3031.63439 | 2477.35003 |
| 4.79687 | 2919.28176 | 3009.26771 | 2457.15963 |
| 4.78762 | 2896.72777 | 2987.1191  | 2437.23867 |
| 4.77842 | 2874.42052 | 2965.19215 | 2417.58889 |
| 4.76924 | 2852.36354 | 2943.49023 | 2398.21151 |
| 4.76011 | 2830.56002 | 2922.01646 | 2379.10718 |
| 4.75101 | 2809.01285 | 2900.77369 | 2360.27608 |
| 4.74194 | 2787.72458 | 2879.76457 | 2341.71783 |
| 4.73291 | 2766.69747 | 2858.99145 | 2323.4316  |



|         |            |            |            |
|---------|------------|------------|------------|
| 4.72391 | 2745.93344 | 2838.45643 | 2305.41607 |
| 4.71495 | 2725.43411 | 2818.16136 | 2287.66947 |
| 4.70602 | 2705.20078 | 2798.1078  | 2270.18958 |
| 4.69712 | 2685.23443 | 2778.29705 | 2252.97379 |
| 4.68826 | 2665.53575 | 2758.73013 | 2236.01907 |
| 4.67943 | 2646.10511 | 2739.4078  | 2219.32203 |
| 4.67063 | 2626.94257 | 2720.33052 | 2202.87893 |
| 4.66187 | 2608.0479  | 2701.49849 | 2186.68571 |
| 4.65314 | 2589.4206  | 2682.91162 | 2170.738   |
| 4.64444 | 2571.05984 | 2664.56956 | 2155.03114 |
| 4.63578 | 2552.96455 | 2646.47166 | 2139.56025 |
| 4.62714 | 2535.13335 | 2628.61702 | 2124.32021 |
| 4.61854 | 2517.56462 | 2611.00445 | 2109.30568 |
| 4.60997 | 2500.25646 | 2593.6325  | 2094.51117 |
| 4.60144 | 2483.20673 | 2576.49945 | 2079.93104 |
| 4.59293 | 2466.41303 | 2559.60333 | 2065.55951 |
| 4.58446 | 2449.87276 | 2542.94191 | 2051.39071 |
| 4.57601 | 2433.58305 | 2526.5127  | 2037.4187  |
| 4.5676  | 2417.54083 | 2510.31298 | 2023.63748 |
| 4.55922 | 2401.74283 | 2494.33979 | 2010.04103 |
| 4.55087 | 2386.18558 | 2478.58995 | 1996.62332 |
| 4.54255 | 2370.86541 | 2463.06004 | 1983.37836 |
| 4.53426 | 2355.77848 | 2447.74646 | 1970.30019 |
| 4.526   | 2340.92079 | 2432.64537 | 1957.3829  |
| 4.51777 | 2326.28818 | 2417.75276 | 1944.62068 |
| 4.50958 | 2311.87633 | 2403.06446 | 1932.00783 |
| 4.50141 | 2297.68081 | 2388.57609 | 1919.53875 |
| 4.49327 | 2283.69705 | 2374.28313 | 1907.208   |
| 4.48516 | 2269.92037 | 2360.18093 | 1895.01026 |
| 4.47707 | 2256.34601 | 2346.26467 | 1882.94042 |

|         |            |            |            |
|---------|------------|------------|------------|
| 4.46902 | 2242.9691  | 2332.52945 | 1870.99353 |
| 4.461   | 2229.78469 | 2318.97024 | 1859.16483 |
| 4.453   | 2216.78779 | 2305.58192 | 1847.44979 |
| 4.44504 | 2203.97332 | 2292.35928 | 1835.84408 |
| 4.4371  | 2191.33617 | 2279.29705 | 1824.34359 |
| 4.42919 | 2178.87122 | 2266.38993 | 1812.94445 |
| 4.42131 | 2166.5733  | 2253.63256 | 1801.64304 |
| 4.41346 | 2154.43725 | 2241.01954 | 1790.43597 |
| 4.40563 | 2142.45788 | 2228.54551 | 1779.32009 |
| 4.39783 | 2130.63004 | 2216.20506 | 1768.29253 |
| 4.39006 | 2118.94859 | 2203.99285 | 1757.35064 |
| 4.38232 | 2107.40842 | 2191.90354 | 1746.49204 |
| 4.37461 | 2096.00446 | 2179.93186 | 1735.71458 |
| 4.36692 | 2084.73169 | 2168.07258 | 1725.01638 |
| 4.35926 | 2073.58515 | 2156.32057 | 1714.3958  |
| 4.35162 | 2062.55995 | 2144.67078 | 1703.85142 |
| 4.34401 | 2051.65128 | 2133.11826 | 1693.38207 |
| 4.33643 | 2040.8544  | 2121.65817 | 1682.98681 |
| 4.32888 | 2030.16467 | 2110.28583 | 1672.66492 |
| 4.32135 | 2019.57756 | 2098.99666 | 1662.41588 |
| 4.31385 | 2009.08863 | 2087.78626 | 1652.23938 |
| 4.30637 | 1998.69357 | 2076.65037 | 1642.1353  |
| 4.29892 | 1988.38818 | 2065.58493 | 1632.10371 |
| 4.2915  | 1978.16838 | 2054.58605 | 1622.14485 |
| 4.2841  | 1968.03023 | 2043.65001 | 1612.25912 |
| 4.27672 | 1957.96993 | 2032.77333 | 1602.44705 |
| 4.26937 | 1947.98381 | 2021.95271 | 1592.70934 |
| 4.26205 | 1938.06836 | 2011.18507 | 1583.04678 |
| 4.25475 | 1928.2202  | 2000.46756 | 1573.4603  |
| 4.24748 | 1918.43612 | 1989.79755 | 1563.9509  |

|         |            |            |            |
|---------|------------|------------|------------|
| 4.24023 | 1908.71305 | 1979.17264 | 1554.51968 |
| 4.23301 | 1899.04807 | 1968.59067 | 1545.16781 |
| 4.22581 | 1889.43845 | 1958.0497  | 1535.89651 |
| 4.21864 | 1879.88159 | 1947.54805 | 1526.70704 |
| 4.21148 | 1870.37507 | 1937.08428 | 1517.60072 |
| 4.20436 | 1860.91662 | 1926.65718 | 1508.57884 |
| 4.19726 | 1851.50414 | 1916.26579 | 1499.64275 |
| 4.19018 | 1842.13568 | 1905.90937 | 1490.79375 |
| 4.18312 | 1832.80946 | 1895.58745 | 1482.03314 |
| 4.17609 | 1823.52386 | 1885.29977 | 1473.36218 |
| 4.16909 | 1814.27743 | 1875.04631 | 1464.78211 |
| 4.1621  | 1805.06885 | 1864.82726 | 1456.2941  |
| 4.15514 | 1795.89696 | 1854.64306 | 1447.89926 |
| 4.14821 | 1786.76078 | 1844.49433 | 1439.59864 |
| 4.14129 | 1777.65945 | 1834.38193 | 1431.3932  |
| 4.1344  | 1768.59226 | 1824.30689 | 1423.28381 |
| 4.12754 | 1759.55864 | 1814.27045 | 1415.27125 |
| 4.12069 | 1750.55818 | 1804.27402 | 1407.3562  |
| 4.11387 | 1741.59058 | 1794.3192  | 1399.53924 |
| 4.10707 | 1732.65566 | 1784.40773 | 1391.82081 |
| 4.10029 | 1723.75341 | 1774.54152 | 1384.20127 |
| 4.09354 | 1714.88389 | 1764.72261 | 1376.68083 |
| 4.0868  | 1706.0473  | 1754.95316 | 1369.25957 |
| 4.08009 | 1697.24394 | 1745.23546 | 1361.93748 |
| 4.0734  | 1688.47422 | 1735.57191 | 1354.71439 |
| 4.06674 | 1679.73864 | 1725.96498 | 1347.59    |
| 4.06009 | 1671.0378  | 1716.41723 | 1340.5639  |
| 4.05347 | 1662.37239 | 1706.93129 | 1333.63554 |
| 4.04687 | 1653.74315 | 1697.50983 | 1326.80424 |
| 4.04029 | 1645.15093 | 1688.15556 | 1320.06919 |

|         |            |            |            |
|---------|------------|------------|------------|
| 4.03373 | 1636.59662 | 1678.87122 | 1313.42948 |
| 4.02719 | 1628.08119 | 1669.65955 | 1306.88405 |
| 4.02067 | 1619.60565 | 1660.5233  | 1300.43175 |
| 4.01418 | 1611.17107 | 1651.46519 | 1294.07129 |
| 4.0077  | 1602.77855 | 1642.48792 | 1287.80128 |
| 4.00125 | 1594.42923 | 1633.59415 | 1281.62025 |
| 3.99482 | 1586.12428 | 1624.78647 | 1275.52661 |
| 3.9884  | 1577.8649  | 1616.06741 | 1269.51869 |
| 3.98201 | 1569.65228 | 1607.43942 | 1263.59471 |
| 3.97564 | 1561.48764 | 1598.90485 | 1257.75285 |
| 3.96929 | 1553.37222 | 1590.46597 | 1251.99119 |
| 3.96296 | 1545.30722 | 1582.1249  | 1246.30776 |
| 3.95665 | 1537.29386 | 1573.88367 | 1240.70053 |
| 3.95036 | 1529.33334 | 1565.74414 | 1235.16741 |
| 3.94409 | 1521.42684 | 1557.70806 | 1229.70628 |
| 3.93784 | 1513.57551 | 1549.77701 | 1224.31497 |
| 3.93161 | 1505.78049 | 1541.95242 | 1218.99131 |
| 3.9254  | 1498.04286 | 1534.23552 | 1213.73309 |
| 3.91921 | 1490.36369 | 1526.62742 | 1208.53808 |
| 3.91303 | 1482.74398 | 1519.129   | 1203.40406 |
| 3.90688 | 1475.1847  | 1511.74099 | 1198.32882 |
| 3.90075 | 1467.68677 | 1504.46392 | 1193.31013 |
| 3.89463 | 1460.25105 | 1497.29811 | 1188.34581 |
| 3.88854 | 1452.87833 | 1490.24372 | 1183.43368 |
| 3.88246 | 1445.56936 | 1483.30068 | 1178.57159 |
| 3.87641 | 1438.32481 | 1476.46874 | 1173.75743 |
| 3.87037 | 1431.14529 | 1469.74745 | 1168.98913 |
| 3.86435 | 1424.03134 | 1463.13617 | 1164.26467 |
| 3.85835 | 1416.98343 | 1456.63404 | 1159.58208 |
| 3.85237 | 1410.00195 | 1450.24002 | 1154.93943 |

|         |            |            |            |
|---------|------------|------------|------------|
| 3.8464  | 1403.08723 | 1443.95289 | 1150.33486 |
| 3.84046 | 1396.2395  | 1437.77123 | 1145.76659 |
| 3.83453 | 1389.45894 | 1431.69344 | 1141.23288 |
| 3.82862 | 1382.74562 | 1425.71773 | 1136.73206 |
| 3.82273 | 1376.09957 | 1419.84215 | 1132.26256 |
| 3.81686 | 1369.52071 | 1414.0646  | 1127.82286 |
| 3.81101 | 1363.00889 | 1408.38278 | 1123.41152 |
| 3.80517 | 1356.5639  | 1402.79428 | 1119.02718 |
| 3.79935 | 1350.18542 | 1397.29653 | 1114.66855 |
| 3.79355 | 1343.87308 | 1391.88681 | 1110.33443 |
| 3.78777 | 1337.62642 | 1386.5623  | 1106.02369 |
| 3.782   | 1331.44492 | 1381.32005 | 1101.73527 |
| 3.77626 | 1325.32798 | 1376.15701 | 1097.46821 |
| 3.77053 | 1319.27491 | 1371.07004 | 1093.2216  |
| 3.76481 | 1313.28498 | 1366.05591 | 1088.99461 |
| 3.75912 | 1307.35738 | 1361.11131 | 1084.78651 |
| 3.75344 | 1301.49125 | 1356.23287 | 1080.59659 |
| 3.74778 | 1295.68564 | 1351.41719 | 1076.42424 |
| 3.74213 | 1289.93956 | 1346.6608  | 1072.26891 |
| 3.73651 | 1284.25198 | 1341.96022 | 1068.13012 |
| 3.7309  | 1278.62177 | 1337.31195 | 1064.00742 |
| 3.7253  | 1273.0478  | 1332.7125  | 1059.90045 |
| 3.71972 | 1267.52886 | 1328.15835 | 1055.80887 |
| 3.71416 | 1262.06372 | 1323.64605 | 1051.73241 |
| 3.70862 | 1256.6511  | 1319.17213 | 1047.67083 |
| 3.70309 | 1251.28967 | 1314.73318 | 1043.62395 |
| 3.69758 | 1245.9781  | 1310.32587 | 1039.5916  |
| 3.69209 | 1240.71501 | 1305.94689 | 1035.57366 |
| 3.68661 | 1235.49899 | 1301.59301 | 1031.57004 |
| 3.68115 | 1230.32863 | 1297.26112 | 1027.58067 |

|         |            |            |            |
|---------|------------|------------|------------|
| 3.6757  | 1225.20248 | 1292.94815 | 1023.60548 |
| 3.67027 | 1220.1191  | 1288.65117 | 1019.64446 |
| 3.66486 | 1215.07703 | 1284.36733 | 1015.69758 |
| 3.65946 | 1210.07479 | 1280.09393 | 1011.76483 |
| 3.65408 | 1205.11093 | 1275.82836 | 1007.84621 |
| 3.64872 | 1200.18398 | 1271.56818 | 1003.94171 |
| 3.64337 | 1195.29248 | 1267.31105 | 1000.05134 |
| 3.63803 | 1190.43498 | 1263.05481 | 996.17509  |
| 3.63271 | 1185.61005 | 1258.79741 | 992.31295  |
| 3.62741 | 1180.81627 | 1254.537   | 988.46491  |
| 3.62212 | 1176.05225 | 1250.27185 | 984.63093  |
| 3.61685 | 1171.31661 | 1246.00041 | 980.81098  |
| 3.61159 | 1166.60799 | 1241.7213  | 977.005    |
| 3.60635 | 1161.9251  | 1237.43328 | 973.21291  |
| 3.60112 | 1157.26664 | 1233.13531 | 969.43464  |
| 3.59591 | 1152.63137 | 1228.82649 | 965.67008  |
| 3.59072 | 1148.01808 | 1224.5061  | 961.9191   |
| 3.58554 | 1143.4256  | 1220.17359 | 958.18156  |
| 3.58037 | 1138.85281 | 1215.82858 | 954.4573   |
| 3.57522 | 1134.29864 | 1211.47084 | 950.74613  |
| 3.57008 | 1129.76205 | 1207.10031 | 947.04786  |
| 3.56496 | 1125.24206 | 1202.71708 | 943.36226  |
| 3.55985 | 1120.73776 | 1198.3214  | 939.6891   |
| 3.55476 | 1116.24826 | 1193.91368 | 936.02813  |
| 3.54968 | 1111.77274 | 1189.49447 | 932.37907  |
| 3.54462 | 1107.31045 | 1185.06444 | 928.74165  |
| 3.53957 | 1102.86068 | 1180.62442 | 925.11556  |
| 3.53453 | 1098.42278 | 1176.17535 | 921.50051  |
| 3.52951 | 1093.99615 | 1171.71831 | 917.89618  |
| 3.52451 | 1089.58028 | 1167.25448 | 914.30225  |

|         |            |            |           |
|---------|------------|------------|-----------|
| 3.51951 | 1085.17469 | 1162.78514 | 910.71839 |
| 3.51453 | 1080.77897 | 1158.31169 | 907.14428 |
| 3.50957 | 1076.39277 | 1153.8356  | 903.57959 |
| 3.50462 | 1072.01578 | 1149.35843 | 900.02401 |
| 3.49968 | 1067.64779 | 1144.88182 | 896.4772  |
| 3.49476 | 1063.28862 | 1140.40746 | 892.93887 |
| 3.48985 | 1058.93814 | 1135.93712 | 889.40871 |
| 3.48496 | 1054.59629 | 1131.4726  | 885.88644 |
| 3.48008 | 1050.26307 | 1127.01574 | 882.37179 |
| 3.47521 | 1045.93853 | 1122.56841 | 878.8645  |
| 3.47036 | 1041.62277 | 1118.1325  | 875.36436 |
| 3.46552 | 1037.31593 | 1113.70991 | 871.87114 |
| 3.46069 | 1033.01823 | 1109.30256 | 868.38467 |
| 3.45588 | 1028.72992 | 1104.91233 | 864.9048  |
| 3.45108 | 1024.45128 | 1100.54113 | 861.43139 |
| 3.44629 | 1020.18266 | 1096.1908  | 857.96435 |
| 3.44152 | 1015.92445 | 1091.86319 | 854.50363 |
| 3.43676 | 1011.67707 | 1087.56008 | 851.04919 |
| 3.43201 | 1007.44097 | 1083.28322 | 847.60105 |
| 3.42728 | 1003.21666 | 1079.03431 | 844.15926 |
| 3.42256 | 999.00466  | 1074.81497 | 840.72389 |
| 3.41785 | 994.80554  | 1070.62678 | 837.29507 |
| 3.41315 | 990.61987  | 1066.47122 | 833.87296 |
| 3.40847 | 986.44829  | 1062.3497  | 830.45777 |
| 3.4038  | 982.29141  | 1058.26357 | 827.04975 |
| 3.39915 | 978.1499   | 1054.21405 | 823.64916 |
| 3.3945  | 974.02443  | 1050.2023  | 820.25634 |
| 3.38987 | 969.91568  | 1046.22936 | 816.87164 |
| 3.38525 | 965.82437  | 1042.29618 | 813.49547 |
| 3.38065 | 961.75119  | 1038.40361 | 810.12826 |

|         |           |            |           |
|---------|-----------|------------|-----------|
| 3.37605 | 957.69686 | 1034.55239 | 806.77048 |
| 3.37147 | 953.66211 | 1030.74314 | 803.42264 |
| 3.36691 | 949.64766 | 1026.97639 | 800.08527 |
| 3.36235 | 945.65422 | 1023.25255 | 796.75895 |
| 3.35781 | 941.68252 | 1019.57191 | 793.44428 |
| 3.35327 | 937.73326 | 1015.93467 | 790.14189 |
| 3.34875 | 933.80715 | 1012.34091 | 786.85241 |
| 3.34425 | 929.90488 | 1008.79058 | 783.57654 |
| 3.33975 | 926.02713 | 1005.28356 | 780.31496 |
| 3.33527 | 922.17455 | 1001.81959 | 777.06837 |
| 3.3308  | 918.34781 | 998.39833  | 773.83751 |
| 3.32634 | 914.54752 | 995.01932  | 770.62311 |
| 3.32189 | 910.77429 | 991.68203  | 767.4259  |
| 3.31746 | 907.0287  | 988.38579  | 764.24665 |
| 3.31303 | 903.3113  | 985.12989  | 761.08609 |
| 3.30862 | 899.62263 | 981.9135   | 757.94498 |
| 3.30422 | 895.96318 | 978.73572  | 754.82405 |
| 3.29984 | 892.33344 | 975.59557  | 751.72406 |
| 3.29546 | 888.73383 | 972.49201  | 748.64571 |
| 3.29109 | 885.16477 | 969.42391  | 745.58973 |
| 3.28674 | 881.62664 | 966.3901   | 742.55681 |
| 3.2824  | 878.11977 | 963.38935  | 739.54762 |
| 3.27807 | 874.64447 | 960.42037  | 736.56282 |
| 3.27375 | 871.20101 | 957.48184  | 733.60303 |
| 3.26944 | 867.78963 | 954.5724   | 730.66886 |
| 3.26515 | 864.41052 | 951.69066  | 727.76087 |
| 3.26086 | 861.06385 | 948.8352   | 724.8796  |
| 3.25659 | 857.74973 | 946.00457  | 722.02555 |
| 3.25232 | 854.46826 | 943.19734  | 719.19918 |
| 3.24807 | 851.21949 | 940.41205  | 716.40091 |



|         |           |           |           |
|---------|-----------|-----------|-----------|
| 3.24383 | 848.00341 | 937.64724 | 713.63113 |
| 3.2396  | 844.82001 | 934.90147 | 710.89018 |
| 3.23539 | 841.66923 | 932.17329 | 708.17836 |
| 3.23118 | 838.55097 | 929.46129 | 705.49591 |
| 3.22698 | 835.46509 | 926.76407 | 702.84303 |
| 3.2228  | 832.41142 | 924.08027 | 700.21989 |
| 3.21862 | 829.38977 | 921.40855 | 697.6266  |
| 3.21446 | 826.39988 | 918.74761 | 695.06321 |
| 3.21031 | 823.44151 | 916.09621 | 692.52974 |
| 3.20616 | 820.51434 | 913.45314 | 690.02616 |
| 3.20203 | 817.61804 | 910.81725 | 687.55237 |
| 3.19791 | 814.75225 | 908.18744 | 685.10827 |
| 3.1938  | 811.91659 | 905.56267 | 682.69365 |
| 3.1897  | 809.11065 | 902.94199 | 680.30832 |
| 3.18561 | 806.33397 | 900.32446 | 677.95198 |
| 3.18153 | 803.58611 | 897.70927 | 675.62435 |
| 3.17746 | 800.86657 | 895.09562 | 673.32506 |
| 3.1734  | 798.17484 | 892.48284 | 671.05372 |
| 3.16936 | 795.51041 | 889.8703  | 668.80991 |
| 3.16532 | 792.87272 | 887.25744 | 666.59314 |
| 3.16129 | 790.26123 | 884.6438  | 664.40291 |
| 3.15728 | 787.67534 | 882.02898 | 662.2387  |
| 3.15327 | 785.11448 | 879.41265 | 660.09993 |
| 3.14927 | 782.57805 | 876.79458 | 657.98601 |
| 3.14529 | 780.06544 | 874.1746  | 655.89631 |
| 3.14131 | 777.57603 | 871.55262 | 653.83019 |
| 3.13734 | 775.10921 | 868.92861 | 651.78698 |
| 3.13339 | 772.66433 | 866.30262 | 649.76601 |
| 3.12944 | 770.24078 | 863.67479 | 647.76656 |
| 3.1255  | 767.83792 | 861.04529 | 645.78794 |

|         |           |           |           |
|---------|-----------|-----------|-----------|
| 3.12158 | 765.45512 | 858.41439 | 643.82941 |
| 3.11766 | 763.09174 | 855.7824  | 641.89024 |
| 3.11375 | 760.74716 | 853.1497  | 639.9697  |
| 3.10986 | 758.42075 | 850.51674 | 638.06705 |
| 3.10597 | 756.1119  | 847.88399 | 636.18155 |
| 3.10209 | 753.81998 | 845.252   | 634.31247 |
| 3.09822 | 751.54441 | 842.62136 | 632.45907 |
| 3.09437 | 749.28459 | 839.99269 | 630.62064 |
| 3.09052 | 747.03992 | 837.36666 | 628.79645 |
| 3.08668 | 744.80985 | 834.74397 | 626.98581 |
| 3.08285 | 742.5938  | 832.12536 | 625.18802 |
| 3.07903 | 740.39124 | 829.51158 | 623.40242 |
| 3.07522 | 738.20163 | 826.90342 | 621.62835 |
| 3.07142 | 736.02446 | 824.30167 | 619.86517 |
| 3.06762 | 733.85923 | 821.70715 | 618.11226 |
| 3.06384 | 731.70545 | 819.12067 | 616.36904 |
| 3.06007 | 729.56267 | 816.54305 | 614.63493 |
| 3.05631 | 727.43043 | 813.97513 | 612.90939 |
| 3.05255 | 725.3083  | 811.41772 | 611.19189 |
| 3.04881 | 723.19587 | 808.87163 | 609.48195 |
| 3.04507 | 721.09276 | 806.33767 | 607.77909 |
| 3.04134 | 718.99859 | 803.81661 | 606.08288 |
| 3.03762 | 716.91301 | 801.30923 | 604.39291 |
| 3.03391 | 714.83569 | 798.81625 | 602.70879 |
| 3.03021 | 712.76632 | 796.33839 | 601.03016 |
| 3.02652 | 710.7046  | 793.87634 | 599.3567  |
| 3.02284 | 708.65027 | 791.43074 | 597.68811 |
| 3.01917 | 706.60306 | 789.0022  | 596.02411 |
| 3.0155  | 704.56275 | 786.5913  | 594.36447 |
| 3.01185 | 702.52911 | 784.19856 | 592.70896 |

|         |           |           |           |
|---------|-----------|-----------|-----------|
| 3.0082  | 700.50196 | 781.82448 | 591.05739 |
| 3.00457 | 698.48112 | 779.46949 | 589.4096  |
| 3.00094 | 696.46642 | 777.13398 | 587.76543 |
| 2.99732 | 694.45773 | 774.81831 | 586.12478 |
| 2.99371 | 692.45491 | 772.52275 | 584.48754 |
| 2.9901  | 690.45786 | 770.24755 | 582.85363 |
| 2.98651 | 688.46649 | 767.9929  | 581.223   |
| 2.98292 | 686.48071 | 765.75894 | 579.59561 |
| 2.97935 | 684.50046 | 763.54573 | 577.97144 |
| 2.97578 | 682.5257  | 761.35331 | 576.35047 |
| 2.97222 | 680.55638 | 759.18166 | 574.73273 |
| 2.96867 | 678.59247 | 757.03069 | 573.11823 |
| 2.96513 | 676.63397 | 754.90026 | 571.50701 |
| 2.96159 | 674.68087 | 752.79021 | 569.8991  |
| 2.95807 | 672.73317 | 750.70028 | 568.29457 |
| 2.95455 | 670.79089 | 748.63021 | 566.69347 |
| 2.95104 | 668.85406 | 746.57966 | 565.09587 |
| 2.94754 | 666.9227  | 744.54825 | 563.50184 |
| 2.94405 | 664.99685 | 742.53556 | 561.91146 |
| 2.94056 | 663.07655 | 740.54113 | 560.32479 |
| 2.93709 | 661.16186 | 738.56447 | 558.74194 |
| 2.93362 | 659.25281 | 736.60503 | 557.16296 |
| 2.93016 | 657.34947 | 734.66223 | 555.58794 |
| 2.92671 | 655.4519  | 732.73549 | 554.01695 |
| 2.92327 | 653.56015 | 730.82415 | 552.45007 |
| 2.91983 | 651.67429 | 728.92757 | 550.88737 |
| 2.9164  | 649.79437 | 727.04507 | 549.32891 |
| 2.91298 | 647.92046 | 725.17593 | 547.77475 |
| 2.90957 | 646.05261 | 723.31945 | 546.22495 |
| 2.90617 | 644.19089 | 721.47489 | 544.67955 |

|         |           |           |           |
|---------|-----------|-----------|-----------|
| 2.90278 | 642.33536 | 719.6415  | 543.13859 |
| 2.89939 | 640.48605 | 717.81854 | 541.60212 |
| 2.89601 | 638.64304 | 716.00527 | 540.07015 |
| 2.89264 | 636.80635 | 714.20091 | 538.54271 |
| 2.88927 | 634.97605 | 712.40472 | 537.01982 |
| 2.88592 | 633.15216 | 710.61596 | 535.50147 |
| 2.88257 | 631.33473 | 708.83389 | 533.98766 |
| 2.87923 | 629.52377 | 707.05778 | 532.4784  |
| 2.8759  | 627.71933 | 705.28692 | 530.97366 |
| 2.87257 | 625.92141 | 703.52062 | 529.47342 |
| 2.86926 | 624.13003 | 701.75822 | 527.97766 |
| 2.86595 | 622.3452  | 699.99905 | 526.48634 |
| 2.86265 | 620.56693 | 698.24249 | 524.99942 |
| 2.85935 | 618.7952  | 696.48796 | 523.51687 |
| 2.85606 | 617.03001 | 694.73488 | 522.03864 |
| 2.85279 | 615.27135 | 692.98272 | 520.56468 |
| 2.84951 | 613.5192  | 691.23098 | 519.09494 |
| 2.84625 | 611.77353 | 689.4792  | 517.62937 |
| 2.84299 | 610.03431 | 687.72694 | 516.16791 |
| 2.83974 | 608.30151 | 685.97383 | 514.71051 |
| 2.8365  | 606.57507 | 684.21952 | 513.25711 |
| 2.83327 | 604.85497 | 682.4637  | 511.80767 |
| 2.83004 | 603.14115 | 680.7061  | 510.36213 |
| 2.82682 | 601.43355 | 678.94651 | 508.92045 |
| 2.82361 | 599.73212 | 677.18475 | 507.48259 |
| 2.8204  | 598.03679 | 675.42068 | 506.04849 |
| 2.81721 | 596.34751 | 673.65421 | 504.61814 |
| 2.81402 | 594.6642  | 671.88529 | 503.19149 |
| 2.81083 | 592.9868  | 670.11392 | 501.76853 |
| 2.80766 | 591.31523 | 668.34014 | 500.34924 |

|         |           |           |           |
|---------|-----------|-----------|-----------|
| 2.80449 | 589.64942 | 666.56403 | 498.93361 |
| 2.80133 | 587.98931 | 664.7857  | 497.52163 |
| 2.79817 | 586.33481 | 663.00533 | 496.11332 |
| 2.79502 | 584.68585 | 661.2231  | 494.70868 |
| 2.79188 | 583.04237 | 659.43927 | 493.30775 |
| 2.78875 | 581.40428 | 657.6541  | 491.91055 |
| 2.78562 | 579.77151 | 655.8679  | 490.51712 |
| 2.7825  | 578.144   | 654.08102 | 489.12752 |
| 2.77939 | 576.52169 | 652.29383 | 487.7418  |
| 2.77629 | 574.90449 | 650.50673 | 486.36003 |
| 2.77319 | 573.29237 | 648.72015 | 484.98228 |
| 2.7701  | 571.68524 | 646.93456 | 483.60866 |
| 2.76701 | 570.08308 | 645.15041 | 482.23924 |
| 2.76393 | 568.48581 | 643.36822 | 480.87413 |
| 2.76086 | 566.8934  | 641.58849 | 479.51345 |
| 2.7578  | 565.30582 | 639.81176 | 478.15731 |
| 2.75474 | 563.72301 | 638.03857 | 476.80584 |
| 2.75169 | 562.14496 | 636.26947 | 475.45917 |
| 2.74865 | 560.57165 | 634.50502 | 474.11744 |
| 2.74561 | 559.00304 | 632.74579 | 472.78079 |
| 2.74258 | 557.43914 | 630.99234 | 471.44938 |
| 2.73955 | 555.87994 | 629.24525 | 470.12335 |
| 2.73654 | 554.32544 | 627.50506 | 468.80286 |
| 2.73353 | 552.77565 | 625.77235 | 467.48808 |
| 2.73052 | 551.23058 | 624.04767 | 466.17916 |
| 2.72753 | 549.69025 | 622.33154 | 464.87626 |
| 2.72454 | 548.1547  | 620.62451 | 463.57955 |
| 2.72155 | 546.62396 | 618.92708 | 462.28919 |
| 2.71857 | 545.09807 | 617.23974 | 461.00534 |
| 2.7156  | 543.57709 | 615.56297 | 459.72815 |

|         |           |           |           |
|---------|-----------|-----------|-----------|
| 2.71264 | 542.06105 | 613.89722 | 458.45778 |
| 2.70968 | 540.55004 | 612.24292 | 457.19439 |
| 2.70673 | 539.0441  | 610.60047 | 455.93812 |
| 2.70378 | 537.54333 | 608.97025 | 454.68911 |
| 2.70084 | 536.04779 | 607.3526  | 453.44749 |
| 2.69791 | 534.55758 | 605.74784 | 452.2134  |
| 2.69498 | 533.07277 | 604.15626 | 450.98696 |
| 2.69207 | 531.59347 | 602.5781  | 449.76826 |
| 2.68915 | 530.11977 | 601.01357 | 448.55743 |
| 2.68624 | 528.65178 | 599.46288 | 447.35456 |
| 2.68334 | 527.1896  | 597.92615 | 446.15972 |
| 2.68045 | 525.73335 | 596.4035  | 444.97299 |
| 2.67756 | 524.28312 | 594.895   | 443.79443 |
| 2.67468 | 522.83905 | 593.40068 | 442.62411 |
| 2.6718  | 521.40123 | 591.92055 | 441.46204 |
| 2.66893 | 519.9698  | 590.45456 | 440.30827 |
| 2.66607 | 518.54487 | 589.00265 | 439.16281 |
| 2.66321 | 517.12655 | 587.56469 | 438.02566 |
| 2.66036 | 515.71497 | 586.14054 | 436.89682 |
| 2.65751 | 514.31025 | 584.73001 | 435.77625 |
| 2.65468 | 512.91248 | 583.33288 | 434.66394 |
| 2.65184 | 511.5218  | 581.9489  | 433.55984 |
| 2.64902 | 510.13832 | 580.57778 | 432.46388 |
| 2.64619 | 508.76213 | 579.21921 | 431.376   |
| 2.64338 | 507.39335 | 577.87284 | 430.29611 |
| 2.64057 | 506.03207 | 576.53828 | 429.22413 |
| 2.63777 | 504.6784  | 575.21514 | 428.15996 |
| 2.63497 | 503.33242 | 573.90298 | 427.10347 |
| 2.63218 | 501.99422 | 572.60134 | 426.05454 |
| 2.62939 | 500.66388 | 571.30976 | 425.01305 |

|         |           |           |           |
|---------|-----------|-----------|-----------|
| 2.62661 | 499.34147 | 570.02774 | 423.97884 |
| 2.62384 | 498.02705 | 568.75475 | 422.95176 |
| 2.62107 | 496.72069 | 567.49028 | 421.93166 |
| 2.61831 | 495.42244 | 566.23376 | 420.91837 |
| 2.61555 | 494.13234 | 564.98465 | 419.91171 |
| 2.6128  | 492.85043 | 563.74238 | 418.91151 |
| 2.61006 | 491.57672 | 562.50638 | 417.91758 |
| 2.60732 | 490.31124 | 561.27606 | 416.92972 |
| 2.60459 | 489.054   | 560.05084 | 415.94774 |
| 2.60186 | 487.80499 | 558.83014 | 414.97145 |
| 2.59914 | 486.5642  | 557.61339 | 414.00064 |
| 2.59642 | 485.33161 | 556.39999 | 413.0351  |
| 2.59371 | 484.10719 | 555.18939 | 412.07464 |
| 2.59101 | 482.89089 | 553.98102 | 411.11905 |
| 2.58831 | 481.68267 | 552.77432 | 410.16812 |
| 2.58562 | 480.48247 | 551.56876 | 409.22165 |
| 2.58293 | 479.2902  | 550.36381 | 408.27942 |
| 2.58025 | 478.10579 | 549.15897 | 407.34125 |
| 2.57757 | 476.92915 | 547.95374 | 406.40692 |
| 2.5749  | 475.76017 | 546.74765 | 405.47624 |
| 2.57223 | 474.59875 | 545.54026 | 404.54901 |
| 2.56957 | 473.44477 | 544.33115 | 403.62504 |
| 2.56692 | 472.29808 | 543.11991 | 402.70416 |
| 2.56427 | 471.15856 | 541.90617 | 401.78616 |
| 2.56162 | 470.02606 | 540.68959 | 400.87088 |
| 2.55899 | 468.90041 | 539.46986 | 399.95815 |
| 2.55635 | 467.78147 | 538.24668 | 399.04779 |
| 2.55373 | 466.66905 | 537.01979 | 398.13965 |
| 2.5511  | 465.56297 | 535.78899 | 397.23357 |
| 2.54849 | 464.46306 | 534.55408 | 396.3294  |

|         |           |           |           |
|---------|-----------|-----------|-----------|
| 2.54588 | 463.36912 | 533.31489 | 395.427   |
| 2.54327 | 462.28096 | 532.0713  | 394.52625 |
| 2.54067 | 461.19836 | 530.82323 | 393.627   |
| 2.53808 | 460.12114 | 529.57061 | 392.72913 |
| 2.53549 | 459.04906 | 528.31341 | 391.83254 |
| 2.5329  | 457.98193 | 527.05166 | 390.93711 |
| 2.53032 | 456.91952 | 525.78537 | 390.04275 |
| 2.52775 | 455.86162 | 524.51464 | 389.14935 |
| 2.52518 | 454.808   | 523.23957 | 388.25683 |
| 2.52262 | 453.75844 | 521.96028 | 387.36511 |
| 2.52006 | 452.71273 | 520.67696 | 386.47412 |
| 2.5175  | 451.67064 | 519.38979 | 385.58378 |
| 2.51496 | 450.63194 | 518.09899 | 384.69403 |
| 2.51241 | 449.59643 | 516.80483 | 383.80482 |
| 2.50987 | 448.56388 | 515.50757 | 382.9161  |
| 2.50734 | 447.53409 | 514.20753 | 382.02782 |
| 2.50481 | 446.50683 | 512.90501 | 381.13994 |
| 2.50229 | 445.48192 | 511.60037 | 380.25243 |
| 2.49977 | 444.45914 | 510.29398 | 379.36526 |
| 2.49726 | 443.4383  | 508.98621 | 378.4784  |
| 2.49476 | 442.41922 | 507.67748 | 377.59185 |
| 2.49225 | 441.4017  | 506.36818 | 376.70557 |
| 2.48976 | 440.38558 | 505.05875 | 375.81957 |
| 2.48726 | 439.37069 | 503.74963 | 374.93383 |
| 2.48478 | 438.35688 | 502.44126 | 374.04836 |
| 2.48229 | 437.34398 | 501.1341  | 373.16316 |
| 2.47982 | 436.33186 | 499.82859 | 372.27823 |
| 2.47734 | 435.32039 | 498.52522 | 371.39359 |
| 2.47488 | 434.30944 | 497.22443 | 370.50924 |
| 2.47241 | 433.29892 | 495.92668 | 369.6252  |



|         |           |           |           |
|---------|-----------|-----------|-----------|
| 2.46996 | 432.28871 | 494.63244 | 368.7415  |
| 2.4675  | 431.27873 | 493.34216 | 367.85816 |
| 2.46506 | 430.2689  | 492.05628 | 366.9752  |
| 2.46261 | 429.25916 | 490.77524 | 366.09266 |
| 2.46017 | 428.24945 | 489.49948 | 365.21057 |
| 2.45774 | 427.23973 | 488.22939 | 364.32897 |
| 2.45531 | 426.22997 | 486.96539 | 363.4479  |
| 2.45289 | 425.22016 | 485.70787 | 362.56739 |
| 2.45047 | 424.21029 | 484.45719 | 361.68751 |
| 2.44806 | 423.20036 | 483.21371 | 360.80829 |
| 2.44565 | 422.19041 | 481.97775 | 359.9298  |
| 2.44324 | 421.18045 | 480.74964 | 359.05208 |
| 2.44084 | 420.17053 | 479.52967 | 358.17521 |
| 2.43845 | 419.16071 | 478.3181  | 357.29925 |
| 2.43605 | 418.15106 | 477.11518 | 356.42426 |
| 2.43367 | 417.14166 | 475.92113 | 355.55032 |
| 2.43129 | 416.13259 | 474.73615 | 354.6775  |
| 2.42891 | 415.12395 | 473.56041 | 353.80588 |
| 2.42654 | 414.11587 | 472.39406 | 352.93555 |
| 2.42417 | 413.10846 | 471.23722 | 352.0666  |
| 2.42181 | 412.10186 | 470.08998 | 351.19911 |
| 2.41945 | 411.0962  | 468.95242 | 350.33318 |
| 2.4171  | 410.09164 | 467.82457 | 349.4689  |
| 2.41475 | 409.08834 | 466.70646 | 348.6064  |
| 2.4124  | 408.08647 | 465.59808 | 347.74576 |
| 2.41006 | 407.08619 | 464.49939 | 346.8871  |
| 2.40773 | 406.0877  | 463.41034 | 346.03054 |
| 2.4054  | 405.09118 | 462.33085 | 345.17619 |
| 2.40307 | 404.09682 | 461.26081 | 344.32417 |
| 2.40075 | 403.10482 | 460.2001  | 343.47461 |

|         |           |           |           |
|---------|-----------|-----------|-----------|
| 2.39843 | 402.11539 | 459.14858 | 342.62764 |
| 2.39612 | 401.12874 | 458.10607 | 341.78338 |
| 2.39381 | 400.14507 | 457.07239 | 340.94197 |
| 2.39151 | 399.16459 | 456.04735 | 340.10355 |
| 2.38921 | 398.18753 | 455.03072 | 339.26825 |
| 2.38691 | 397.21409 | 454.02226 | 338.43621 |
| 2.38462 | 396.2445  | 453.02173 | 337.60757 |
| 2.38234 | 395.27896 | 452.02887 | 336.78247 |
| 2.38005 | 394.3177  | 451.0434  | 335.96105 |
| 2.37778 | 393.36092 | 450.06506 | 335.14346 |
| 2.3755  | 392.40884 | 449.09354 | 334.32984 |
| 2.37323 | 391.46166 | 448.12856 | 333.52032 |
| 2.37097 | 390.51958 | 447.16982 | 332.71505 |
| 2.36871 | 389.58281 | 446.21701 | 331.91416 |
| 2.36645 | 388.65153 | 445.26984 | 331.11779 |
| 2.3642  | 387.72594 | 444.32799 | 330.32607 |
| 2.36195 | 386.80621 | 443.39117 | 329.53913 |
| 2.35971 | 385.89252 | 442.45908 | 328.75709 |
| 2.35747 | 384.98504 | 441.53143 | 327.98007 |
| 2.35524 | 384.08392 | 440.60792 | 327.20819 |
| 2.35301 | 383.18932 | 439.68827 | 326.44156 |
| 2.35078 | 382.30137 | 438.77222 | 325.68028 |
| 2.34856 | 381.42021 | 437.8595  | 324.92445 |
| 2.34634 | 380.54596 | 436.94985 | 324.17415 |
| 2.34413 | 379.67872 | 436.04305 | 323.42947 |
| 2.34192 | 378.81859 | 435.13885 | 322.69049 |
| 2.33971 | 377.96568 | 434.23705 | 321.95725 |
| 2.33751 | 377.12004 | 433.33745 | 321.22983 |
| 2.33532 | 376.28175 | 432.43987 | 320.50827 |
| 2.33312 | 375.45086 | 431.54414 | 319.7926  |

|         |           |           |           |
|---------|-----------|-----------|-----------|
| 2.33093 | 374.62741 | 430.6501  | 319.08285 |
| 2.32875 | 373.81143 | 429.75763 | 318.37904 |
| 2.32657 | 373.00293 | 428.86661 | 317.68117 |
| 2.32439 | 372.20191 | 427.97695 | 316.98923 |
| 2.32222 | 371.40838 | 427.08855 | 316.3032  |
| 2.32005 | 370.6223  | 426.20137 | 315.62307 |
| 2.31789 | 369.84363 | 425.31535 | 314.94878 |
| 2.31573 | 369.07234 | 424.43046 | 314.28029 |
| 2.31357 | 368.30836 | 423.54671 | 313.61753 |
| 2.31142 | 367.55163 | 422.66409 | 312.96043 |
| 2.30927 | 366.80204 | 421.78262 | 312.30891 |
| 2.30713 | 366.05952 | 420.90236 | 311.66286 |
| 2.30499 | 365.32394 | 420.02334 | 311.02218 |
| 2.30285 | 364.5952  | 419.14565 | 310.38676 |
| 2.30072 | 363.87316 | 418.26936 | 309.75646 |
| 2.29859 | 363.15767 | 417.39457 | 309.13115 |
| 2.29647 | 362.4486  | 416.52138 | 308.51069 |
| 2.29435 | 361.74577 | 415.64992 | 307.8949  |
| 2.29223 | 361.04902 | 414.78031 | 307.28365 |
| 2.29012 | 360.35816 | 413.91269 | 306.67674 |
| 2.28801 | 359.67301 | 413.0472  | 306.07401 |
| 2.2859  | 358.99337 | 412.184   | 305.47526 |
| 2.2838  | 358.31904 | 411.32324 | 304.88031 |
| 2.2817  | 357.64981 | 410.46507 | 304.28896 |
| 2.27961 | 356.98546 | 409.60966 | 303.70102 |
| 2.27752 | 356.32577 | 408.75718 | 303.11627 |
| 2.27544 | 355.67051 | 407.90778 | 302.53451 |
| 2.27335 | 355.01945 | 407.06163 | 301.95554 |
| 2.27128 | 354.37237 | 406.21889 | 301.37914 |
| 2.2692  | 353.72901 | 405.37971 | 300.80511 |

|         |           |           |           |
|---------|-----------|-----------|-----------|
| 2.26713 | 353.08914 | 404.54425 | 300.23323 |
| 2.26506 | 352.45252 | 403.71265 | 299.66331 |
| 2.263   | 351.8189  | 402.88505 | 299.09513 |
| 2.26094 | 351.18805 | 402.06157 | 298.52849 |
| 2.25889 | 350.55972 | 401.24234 | 297.9632  |
| 2.25684 | 349.93367 | 400.42748 | 297.39906 |
| 2.25479 | 349.30966 | 399.61707 | 296.83589 |
| 2.25274 | 348.68745 | 398.81121 | 296.27351 |
| 2.2507  | 348.06681 | 398.00997 | 295.71173 |
| 2.24867 | 347.44752 | 397.21342 | 295.15041 |
| 2.24663 | 346.82934 | 396.42161 | 294.58937 |
| 2.2446  | 346.21205 | 395.63456 | 294.02847 |
| 2.24258 | 345.59545 | 394.8523  | 293.46757 |
| 2.24056 | 344.97932 | 394.07484 | 292.90655 |
| 2.23854 | 344.36346 | 393.30216 | 292.34528 |
| 2.23652 | 343.74768 | 392.53424 | 291.78366 |
| 2.23451 | 343.13179 | 391.77105 | 291.22159 |
| 2.2325  | 342.51562 | 391.01252 | 290.65899 |
| 2.2305  | 341.89899 | 390.2586  | 290.09578 |
| 2.2285  | 341.28175 | 389.50919 | 289.53191 |
| 2.2265  | 340.66375 | 388.7642  | 288.96733 |
| 2.22451 | 340.04484 | 388.02352 | 288.402   |
| 2.22252 | 339.42491 | 387.28702 | 287.8359  |
| 2.22053 | 338.80383 | 386.55457 | 287.26902 |
| 2.21855 | 338.18149 | 385.82603 | 286.70135 |
| 2.21657 | 337.5578  | 385.10123 | 286.13292 |
| 2.2146  | 336.93269 | 384.38    | 285.56374 |
| 2.21262 | 336.30606 | 383.66218 | 284.99386 |
| 2.21065 | 335.67787 | 382.94757 | 284.42331 |
| 2.20869 | 335.04807 | 382.23599 | 283.85216 |

|         |           |           |           |
|---------|-----------|-----------|-----------|
| 2.20673 | 334.41662 | 381.52723 | 283.28046 |
| 2.20477 | 333.7835  | 380.82111 | 282.70831 |
| 2.20282 | 333.1487  | 380.1174  | 282.13578 |
| 2.20086 | 332.51221 | 379.41591 | 281.56296 |
| 2.19892 | 331.87406 | 378.71644 | 280.98996 |
| 2.19697 | 331.23427 | 378.01876 | 280.41689 |
| 2.19503 | 330.59287 | 377.32268 | 279.84385 |
| 2.19309 | 329.94991 | 376.628   | 279.27097 |
| 2.19116 | 329.30546 | 375.93452 | 278.69838 |
| 2.18923 | 328.65959 | 375.24205 | 278.12619 |
| 2.1873  | 328.01237 | 374.55039 | 277.55455 |
| 2.18538 | 327.36391 | 373.85939 | 276.98358 |
| 2.18346 | 326.7143  | 373.16886 | 276.41341 |
| 2.18154 | 326.06366 | 372.47864 | 275.84419 |
| 2.17963 | 325.41211 | 371.78861 | 275.27605 |
| 2.17772 | 324.75979 | 371.0986  | 274.70913 |
| 2.17581 | 324.10683 | 370.40852 | 274.14354 |
| 2.17391 | 323.45339 | 369.71825 | 273.57944 |
| 2.17201 | 322.79962 | 369.02769 | 273.01693 |
| 2.17011 | 322.14568 | 368.33678 | 272.45615 |
| 2.16822 | 321.49175 | 367.64545 | 271.89721 |
| 2.16633 | 320.83801 | 366.95365 | 271.34022 |
| 2.16444 | 320.18463 | 366.26137 | 270.7853  |
| 2.16256 | 319.5318  | 365.56858 | 270.23253 |
| 2.16067 | 318.87972 | 364.87531 | 269.68203 |
| 2.1588  | 318.22857 | 364.18157 | 269.13387 |
| 2.15692 | 317.57856 | 363.48741 | 268.58813 |
| 2.15505 | 316.92989 | 362.79289 | 268.04489 |
| 2.15319 | 316.28276 | 362.09809 | 267.5042  |
| 2.15132 | 315.63737 | 361.4031  | 266.96612 |

|         |           |           |           |
|---------|-----------|-----------|-----------|
| 2.14946 | 314.99392 | 360.70804 | 266.43071 |
| 2.1476  | 314.35262 | 360.01304 | 265.89798 |
| 2.14575 | 313.71367 | 359.31823 | 265.36799 |
| 2.1439  | 313.07728 | 358.62379 | 264.84074 |
| 2.14205 | 312.44363 | 357.92989 | 264.31624 |
| 2.1402  | 311.81292 | 357.2367  | 263.79451 |
| 2.13836 | 311.18535 | 356.54444 | 263.27553 |
| 2.13652 | 310.56111 | 355.8533  | 262.75929 |
| 2.13469 | 309.94037 | 355.16352 | 262.24578 |
| 2.13286 | 309.32332 | 354.47532 | 261.73497 |
| 2.13103 | 308.71012 | 353.78894 | 261.22681 |
| 2.1292  | 308.10094 | 353.10462 | 260.72128 |
| 2.12738 | 307.49595 | 352.42261 | 260.21833 |
| 2.12556 | 306.89528 | 351.74316 | 259.7179  |
| 2.12374 | 306.29908 | 351.06653 | 259.21994 |
| 2.12193 | 305.70749 | 350.39297 | 258.72438 |
| 2.12012 | 305.12062 | 349.72273 | 258.23118 |
| 2.11831 | 304.53861 | 349.05606 | 257.74025 |
| 2.1165  | 303.96154 | 348.39321 | 257.25153 |
| 2.1147  | 303.38952 | 347.73443 | 256.76495 |
| 2.1129  | 302.82263 | 347.07994 | 256.28044 |
| 2.11111 | 302.26094 | 346.42998 | 255.79793 |
| 2.10932 | 301.70451 | 345.78475 | 255.31735 |
| 2.10753 | 301.15341 | 345.14447 | 254.83862 |
| 2.10574 | 300.60766 | 344.50933 | 254.36169 |
| 2.10396 | 300.06729 | 343.87949 | 253.88648 |
| 2.10218 | 299.53232 | 343.25514 | 253.41294 |
| 2.1004  | 299.00276 | 342.63641 | 252.941   |
| 2.09863 | 298.47859 | 342.02343 | 252.47061 |
| 2.09686 | 297.95979 | 341.41632 | 252.00172 |

|         |           |           |           |
|---------|-----------|-----------|-----------|
| 2.09509 | 297.44633 | 340.81517 | 251.53428 |
| 2.09332 | 296.93816 | 340.22004 | 251.06826 |
| 2.09156 | 296.43523 | 339.631   | 250.60362 |
| 2.0898  | 295.93747 | 339.04806 | 250.14033 |
| 2.08805 | 295.44479 | 338.47124 | 249.67838 |
| 2.08629 | 294.9571  | 337.90052 | 249.21774 |
| 2.08454 | 294.4743  | 337.33586 | 248.7584  |
| 2.0828  | 293.99627 | 336.77721 | 248.30036 |
| 2.08105 | 293.52289 | 336.22448 | 247.84364 |
| 2.07931 | 293.05401 | 335.67757 | 247.38823 |
| 2.07757 | 292.58949 | 335.13634 | 246.93415 |
| 2.07584 | 292.12917 | 334.60065 | 246.48143 |
| 2.0741  | 291.67288 | 334.07033 | 246.0301  |
| 2.07237 | 291.22044 | 333.54518 | 245.58019 |
| 2.07065 | 290.77168 | 333.02499 | 245.13173 |
| 2.06892 | 290.32638 | 332.50953 | 244.68478 |
| 2.0672  | 289.88436 | 331.99855 | 244.23938 |
| 2.06548 | 289.44541 | 331.49177 | 243.79558 |
| 2.06377 | 289.0093  | 330.98892 | 243.35344 |
| 2.06205 | 288.57582 | 330.48969 | 242.91302 |
| 2.06035 | 288.14473 | 329.99376 | 242.47437 |
| 2.05864 | 287.71582 | 329.50081 | 242.03756 |
| 2.05693 | 287.28883 | 329.01051 | 241.60265 |
| 2.05523 | 286.86353 | 328.52249 | 241.16969 |
| 2.05353 | 286.43968 | 328.03642 | 240.73875 |
| 2.05184 | 286.01703 | 327.55191 | 240.30989 |
| 2.05015 | 285.59533 | 327.06861 | 239.88315 |
| 2.04846 | 285.17434 | 326.58615 | 239.45859 |
| 2.04677 | 284.75381 | 326.10415 | 239.03627 |
| 2.04508 | 284.33348 | 325.62224 | 238.61621 |

|         |           |           |           |
|---------|-----------|-----------|-----------|
| 2.0434  | 283.91312 | 325.14005 | 238.19846 |
| 2.04172 | 283.49248 | 324.65722 | 237.78304 |
| 2.04005 | 283.07131 | 324.17339 | 237.36998 |
| 2.03837 | 282.64938 | 323.68821 | 236.9593  |
| 2.0367  | 282.22645 | 323.20133 | 236.55099 |
| 2.03503 | 281.80229 | 322.71242 | 236.14506 |
| 2.03337 | 281.37668 | 322.22117 | 235.74149 |
| 2.03171 | 280.9494  | 321.72726 | 235.34025 |
| 2.03005 | 280.52022 | 321.23041 | 234.94133 |
| 2.02839 | 280.08896 | 320.73034 | 234.54466 |
| 2.02673 | 279.65541 | 320.2268  | 234.1502  |
| 2.02508 | 279.21938 | 319.71956 | 233.75788 |
| 2.02343 | 278.78069 | 319.20839 | 233.36762 |
| 2.02179 | 278.33917 | 318.69311 | 232.97933 |
| 2.02014 | 277.89466 | 318.17354 | 232.5929  |
| 2.0185  | 277.44701 | 317.64954 | 232.20823 |
| 2.01686 | 276.99608 | 317.12098 | 231.82519 |
| 2.01523 | 276.54175 | 316.58777 | 231.44365 |
| 2.01359 | 276.08389 | 316.04983 | 231.06345 |
| 2.01196 | 275.62242 | 315.50712 | 230.68445 |
| 2.01034 | 275.15723 | 314.9596  | 230.30648 |
| 2.00871 | 274.68824 | 314.40729 | 229.92936 |
| 2.00709 | 274.21541 | 313.85022 | 229.55292 |
| 2.00547 | 273.73867 | 313.28843 | 229.17695 |
| 2.00385 | 273.25798 | 312.722   | 228.80128 |
| 2.00224 | 272.77334 | 312.15105 | 228.42569 |
| 2.00062 | 272.28473 | 311.5757  | 228.04998 |
| 1.99902 | 271.79215 | 310.99609 | 227.67394 |
| 1.99741 | 271.29564 | 310.41241 | 227.29735 |
| 1.9958  | 270.79521 | 309.82484 | 226.92001 |



|         |           |           |           |
|---------|-----------|-----------|-----------|
| 1.9942  | 270.29093 | 309.23361 | 226.5417  |
| 1.9926  | 269.78285 | 308.63895 | 226.1622  |
| 1.99101 | 269.27107 | 308.04111 | 225.78132 |
| 1.98941 | 268.75566 | 307.44036 | 225.39883 |
| 1.98782 | 268.23674 | 306.83699 | 225.01455 |
| 1.98623 | 267.71442 | 306.23129 | 224.62828 |
| 1.98465 | 267.18885 | 305.62357 | 224.23982 |
| 1.98306 | 266.66017 | 305.01416 | 223.849   |
| 1.98148 | 266.12853 | 304.40339 | 223.45566 |
| 1.9799  | 265.59412 | 303.79159 | 223.05963 |
| 1.97832 | 265.05712 | 303.1791  | 222.66078 |
| 1.97675 | 264.51773 | 302.56628 | 222.25897 |
| 1.97518 | 263.97615 | 301.95346 | 221.8541  |
| 1.97361 | 263.43261 | 301.341   | 221.44605 |
| 1.97204 | 262.88733 | 300.72924 | 221.03474 |
| 1.97048 | 262.34055 | 300.11853 | 220.62013 |
| 1.96892 | 261.79253 | 299.50919 | 220.20215 |
| 1.96736 | 261.24352 | 298.90156 | 219.78079 |
| 1.9658  | 260.69379 | 298.29596 | 219.35603 |
| 1.96425 | 260.14361 | 297.69271 | 218.9279  |
| 1.9627  | 259.59325 | 297.09208 | 218.49642 |
| 1.96115 | 259.043   | 296.49439 | 218.06166 |
| 1.9596  | 258.49316 | 295.89988 | 217.6237  |
| 1.95806 | 257.94401 | 295.30882 | 217.18263 |
| 1.95652 | 257.39585 | 294.72145 | 216.73858 |
| 1.95498 | 256.84898 | 294.13797 | 216.29169 |
| 1.95344 | 256.3037  | 293.5586  | 215.84212 |
| 1.95191 | 255.76032 | 292.98351 | 215.39007 |
| 1.95037 | 255.21913 | 292.41286 | 214.93573 |
| 1.94884 | 254.68044 | 291.84679 | 214.47933 |

|         |           |           |           |
|---------|-----------|-----------|-----------|
| 1.94732 | 254.14454 | 291.2854  | 214.02111 |
| 1.94579 | 253.61174 | 290.7288  | 213.56134 |
| 1.94427 | 253.08232 | 290.17705 | 213.10029 |
| 1.94275 | 252.55658 | 289.63019 | 212.63825 |
| 1.94123 | 252.03479 | 289.08826 | 212.17554 |
| 1.93972 | 251.51724 | 288.55126 | 211.71247 |
| 1.9382  | 251.00419 | 288.01916 | 211.24936 |
| 1.93669 | 250.49591 | 287.49193 | 210.78658 |
| 1.93518 | 249.99266 | 286.96949 | 210.32445 |
| 1.93368 | 249.49467 | 286.45176 | 209.86334 |
| 1.93217 | 249.00218 | 285.93865 | 209.40361 |
| 1.93067 | 248.51542 | 285.43003 | 208.94562 |
| 1.92917 | 248.03459 | 284.92576 | 208.48973 |
| 1.92768 | 247.55991 | 284.42567 | 208.0363  |
| 1.92618 | 247.09154 | 283.92961 | 207.5857  |
| 1.92469 | 246.62966 | 283.43737 | 207.13827 |
| 1.9232  | 246.17444 | 282.94877 | 206.69437 |
| 1.92171 | 245.72602 | 282.4636  | 206.25433 |
| 1.92023 | 245.28451 | 281.98162 | 205.81847 |
| 1.91875 | 244.85004 | 281.50262 | 205.38711 |
| 1.91727 | 244.42269 | 281.02635 | 204.96055 |
| 1.91579 | 244.00255 | 280.55258 | 204.53907 |
| 1.91431 | 243.58967 | 280.08107 | 204.12293 |
| 1.91284 | 243.18409 | 279.61156 | 203.71238 |
| 1.91137 | 242.78584 | 279.14382 | 203.30764 |
| 1.9099  | 242.39493 | 278.6776  | 202.90889 |
| 1.90843 | 242.01133 | 278.21265 | 202.51633 |
| 1.90697 | 241.63502 | 277.74876 | 202.13008 |
| 1.9055  | 241.26595 | 277.28568 | 201.75029 |
| 1.90404 | 240.90404 | 276.82319 | 201.37702 |

|         |           |           |           |
|---------|-----------|-----------|-----------|
| 1.90259 | 240.54921 | 276.3611  | 201.01035 |
| 1.90113 | 240.20134 | 275.89919 | 200.65031 |
| 1.89968 | 239.86031 | 275.43729 | 200.29691 |
| 1.89822 | 239.52598 | 274.97521 | 199.9501  |
| 1.89678 | 239.19818 | 274.5128  | 199.60984 |
| 1.89533 | 238.87672 | 274.04992 | 199.27604 |
| 1.89388 | 238.56141 | 273.58644 | 198.94856 |
| 1.89244 | 238.25203 | 273.12225 | 198.62727 |
| 1.891   | 237.94834 | 272.65727 | 198.31197 |
| 1.88956 | 237.65009 | 272.19142 | 198.00246 |
| 1.88813 | 237.35702 | 271.72465 | 197.6985  |
| 1.88669 | 237.06884 | 271.25693 | 197.39981 |
| 1.88526 | 236.78526 | 270.78825 | 197.10611 |
| 1.88383 | 236.50595 | 270.31861 | 196.81707 |
| 1.88241 | 236.23061 | 269.84805 | 196.53236 |
| 1.88098 | 235.95888 | 269.37662 | 196.2516  |
| 1.87956 | 235.69042 | 268.90437 | 195.97441 |
| 1.87814 | 235.42488 | 268.4314  | 195.7004  |
| 1.87672 | 235.16187 | 267.9578  | 195.42913 |
| 1.8753  | 234.90103 | 267.48371 | 195.16018 |
| 1.87389 | 234.64196 | 267.00925 | 194.8931  |
| 1.87248 | 234.38428 | 266.53458 | 194.62744 |
| 1.87107 | 234.12757 | 266.05987 | 194.36274 |
| 1.86966 | 233.87145 | 265.5853  | 194.09853 |
| 1.86825 | 233.6155  | 265.11106 | 193.83435 |
| 1.86685 | 233.35931 | 264.63735 | 193.56974 |
| 1.86545 | 233.10247 | 264.16438 | 193.30423 |
| 1.86405 | 232.84458 | 263.69238 | 193.03737 |
| 1.86265 | 232.58521 | 263.22157 | 192.76872 |
| 1.86126 | 232.32397 | 262.75216 | 192.49784 |

|         |           |           |           |
|---------|-----------|-----------|-----------|
| 1.85986 | 232.06045 | 262.2844  | 192.22433 |
| 1.85847 | 231.79426 | 261.81852 | 191.94777 |
| 1.85708 | 231.525   | 261.35474 | 191.66779 |
| 1.8557  | 231.25228 | 260.89329 | 191.38403 |
| 1.85431 | 230.97574 | 260.43439 | 191.09616 |
| 1.85293 | 230.69501 | 259.97825 | 190.80388 |
| 1.85155 | 230.40972 | 259.52507 | 190.50691 |
| 1.85017 | 230.11955 | 259.07506 | 190.20501 |
| 1.84879 | 229.82416 | 258.62839 | 189.89796 |
| 1.84742 | 229.52324 | 258.18523 | 189.58559 |
| 1.84604 | 229.21648 | 257.74573 | 189.26777 |
| 1.84467 | 228.90362 | 257.31003 | 188.94439 |
| 1.84331 | 228.58439 | 256.87826 | 188.61539 |
| 1.84194 | 228.25853 | 256.45049 | 188.28075 |
| 1.84057 | 227.92584 | 256.02682 | 187.94049 |
| 1.83921 | 227.5861  | 255.6073  | 187.59467 |
| 1.83785 | 227.23914 | 255.19195 | 187.24339 |
| 1.83649 | 226.88479 | 254.7808  | 186.88679 |
| 1.83514 | 226.52293 | 254.37383 | 186.52507 |
| 1.83378 | 226.15343 | 253.97099 | 186.15844 |
| 1.83243 | 225.77623 | 253.57223 | 185.78718 |
| 1.83108 | 225.39124 | 253.17745 | 185.41158 |
| 1.82973 | 224.99845 | 252.78654 | 185.03201 |
| 1.82839 | 224.59784 | 252.39936 | 184.64883 |
| 1.82704 | 224.18943 | 252.01574 | 184.26247 |
| 1.8257  | 223.77326 | 251.63551 | 183.87338 |
| 1.82436 | 223.34942 | 251.25844 | 183.48204 |
| 1.82302 | 222.91799 | 250.88431 | 183.08897 |
| 1.82168 | 222.47911 | 250.51285 | 182.69471 |
| 1.82035 | 222.03293 | 250.1438  | 182.29982 |

|         |           |           |           |
|---------|-----------|-----------|-----------|
| 1.81902 | 221.57963 | 249.77685 | 181.90488 |
| 1.81769 | 221.11943 | 249.4117  | 181.51052 |
| 1.81636 | 220.65256 | 249.04801 | 181.11734 |
| 1.81503 | 220.17928 | 248.68544 | 180.72598 |
| 1.81371 | 219.69988 | 248.32363 | 180.3371  |
| 1.81238 | 219.21468 | 247.96223 | 179.95133 |
| 1.81106 | 218.72401 | 247.60084 | 179.56933 |
| 1.80974 | 218.22824 | 247.2391  | 179.19177 |
| 1.80843 | 217.72776 | 246.87661 | 178.81927 |
| 1.80711 | 217.22297 | 246.51299 | 178.4525  |
| 1.8058  | 216.71431 | 246.14785 | 178.09207 |
| 1.80449 | 216.20223 | 245.78081 | 177.7386  |
| 1.80318 | 215.68719 | 245.41149 | 177.39268 |
| 1.80187 | 215.16969 | 245.03951 | 177.0549  |
| 1.80056 | 214.65024 | 244.66453 | 176.72581 |
| 1.79926 | 214.12935 | 244.2862  | 176.40592 |
| 1.79796 | 213.60756 | 243.90417 | 176.09572 |
| 1.79666 | 213.08541 | 243.51815 | 175.79567 |
| 1.79536 | 212.56348 | 243.12784 | 175.5062  |
| 1.79406 | 212.04232 | 242.73296 | 175.22768 |
| 1.79277 | 211.52252 | 242.33328 | 174.96044 |
| 1.79148 | 211.00465 | 241.92856 | 174.70479 |
| 1.79018 | 210.48931 | 241.51864 | 174.46097 |
| 1.7889  | 209.97708 | 241.10333 | 174.22917 |
| 1.78761 | 209.46855 | 240.68253 | 174.00955 |
| 1.78632 | 208.96432 | 240.25612 | 173.80221 |
| 1.78504 | 208.46497 | 239.82406 | 173.6072  |
| 1.78376 | 207.97107 | 239.38633 | 173.42451 |
| 1.78248 | 207.48322 | 238.94293 | 173.25408 |
| 1.7812  | 207.00196 | 238.49393 | 173.09581 |

|         |           |           |           |
|---------|-----------|-----------|-----------|
| 1.77993 | 206.52786 | 238.03941 | 172.94953 |
| 1.77865 | 206.06146 | 237.5795  | 172.81504 |
| 1.77738 | 205.60328 | 237.11438 | 172.69205 |
| 1.77611 | 205.15384 | 236.64425 | 172.58027 |
| 1.77484 | 204.71363 | 236.16937 | 172.47933 |
| 1.77357 | 204.28312 | 235.69003 | 172.38881 |
| 1.77231 | 203.86276 | 235.20653 | 172.30827 |
| 1.77104 | 203.45297 | 234.71925 | 172.23721 |
| 1.76978 | 203.05416 | 234.22859 | 172.17508 |
| 1.76852 | 202.66669 | 233.73497 | 172.12132 |
| 1.76727 | 202.29091 | 233.23886 | 172.07532 |
| 1.76601 | 201.92714 | 232.74074 | 172.03644 |
| 1.76476 | 201.57564 | 232.24115 | 172.004   |
| 1.7635  | 201.23666 | 231.74062 | 171.97733 |
| 1.76225 | 200.91042 | 231.23973 | 171.95571 |
| 1.761   | 200.59708 | 230.73908 | 171.93841 |
| 1.75976 | 200.29679 | 230.23926 | 171.9247  |
| 1.75851 | 200.00964 | 229.7409  | 171.91383 |
| 1.75727 | 199.73568 | 229.24464 | 171.90504 |
| 1.75603 | 199.47493 | 228.75112 | 171.89759 |
| 1.75479 | 199.22737 | 228.26099 | 171.89073 |
| 1.75355 | 198.99293 | 227.7749  | 171.88373 |
| 1.75231 | 198.77149 | 227.2935  | 171.87587 |
| 1.75108 | 198.5629  | 226.81743 | 171.86643 |
| 1.74984 | 198.36696 | 226.34732 | 171.85475 |
| 1.74861 | 198.18344 | 225.8838  | 171.84016 |
| 1.74738 | 198.01204 | 225.42746 | 171.82204 |
| 1.74615 | 197.85244 | 224.97888 | 171.7998  |
| 1.74493 | 197.70427 | 224.53863 | 171.77288 |
| 1.7437  | 197.5671  | 224.10722 | 171.74077 |

|         |           |           |           |
|---------|-----------|-----------|-----------|
| 1.74248 | 197.44048 | 223.68517 | 171.703   |
| 1.74126 | 197.32391 | 223.27293 | 171.65915 |
| 1.74004 | 197.21686 | 222.87091 | 171.60885 |
| 1.73882 | 197.11873 | 222.47952 | 171.55178 |
| 1.73761 | 197.02891 | 222.09908 | 171.48767 |
| 1.73639 | 196.94674 | 221.72989 | 171.41631 |
| 1.73518 | 196.87153 | 221.37217 | 171.33755 |
| 1.73397 | 196.80254 | 221.02613 | 171.2513  |
| 1.73276 | 196.73903 | 220.6919  | 171.15752 |
| 1.73155 | 196.68018 | 220.36955 | 171.05624 |
| 1.73035 | 196.62519 | 220.05909 | 170.94754 |
| 1.72914 | 196.5732  | 219.76049 | 170.83157 |
| 1.72794 | 196.52334 | 219.47365 | 170.70853 |
| 1.72674 | 196.47471 | 219.1984  | 170.57868 |
| 1.72554 | 196.4264  | 218.93451 | 170.44233 |
| 1.72434 | 196.37746 | 218.68169 | 170.29986 |
| 1.72315 | 196.32696 | 218.4396  | 170.15168 |
| 1.72195 | 196.27392 | 218.20782 | 169.99825 |
| 1.72076 | 196.21738 | 217.98588 | 169.8401  |
| 1.71957 | 196.15636 | 217.77324 | 169.67778 |
| 1.71838 | 196.08988 | 217.56931 | 169.51187 |
| 1.71719 | 196.01696 | 217.37345 | 169.34301 |
| 1.71601 | 195.93663 | 217.18494 | 169.17186 |
| 1.71482 | 195.8479  | 217.00305 | 168.99909 |
| 1.71364 | 195.74983 | 216.82696 | 168.8254  |
| 1.71246 | 195.64145 | 216.65583 | 168.65152 |
| 1.71128 | 195.52185 | 216.48876 | 168.47817 |
| 1.7101  | 195.39011 | 216.32482 | 168.30607 |
| 1.70892 | 195.24533 | 216.16306 | 168.13597 |
| 1.70775 | 195.08666 | 216.00247 | 167.96857 |

|         |           |           |           |
|---------|-----------|-----------|-----------|
| 1.70658 | 194.91327 | 215.84204 | 167.80459 |
| 1.70541 | 194.72435 | 215.68072 | 167.64472 |
| 1.70424 | 194.51915 | 215.51745 | 167.48962 |
| 1.70307 | 194.29694 | 215.35117 | 167.33993 |
| 1.7019  | 194.05704 | 215.1808  | 167.19625 |
| 1.70074 | 193.79882 | 215.00527 | 167.05914 |
| 1.69957 | 193.5217  | 214.82351 | 166.9291  |
| 1.69841 | 193.22516 | 214.63445 | 166.80659 |
| 1.69725 | 192.9087  | 214.43707 | 166.69203 |
| 1.69609 | 192.57193 | 214.23033 | 166.58573 |
| 1.69494 | 192.21449 | 214.01324 | 166.48799 |
| 1.69378 | 191.83607 | 213.78486 | 166.399   |
| 1.69263 | 191.43648 | 213.54426 | 166.31888 |
| 1.69147 | 191.01553 | 213.29057 | 166.24769 |
| 1.69032 | 190.57317 | 213.02297 | 166.1854  |
| 1.68917 | 190.10936 | 212.74069 | 166.13188 |
| 1.68803 | 189.62417 | 212.44303 | 166.08695 |
| 1.68688 | 189.11775 | 212.12935 | 166.05032 |
| 1.68574 | 188.59032 | 211.79909 | 166.0216  |
| 1.68459 | 188.04215 | 211.45176 | 166.00034 |
| 1.68345 | 187.47365 | 211.08694 | 165.98598 |
| 1.68231 | 186.88525 | 210.7043  | 165.97789 |
| 1.68117 | 186.2775  | 210.30362 | 165.97533 |
| 1.68004 | 185.65103 | 209.88473 | 165.97749 |
| 1.6789  | 185.00652 | 209.44759 | 165.98348 |
| 1.67777 | 184.34478 | 208.99224 | 165.99232 |
| 1.67664 | 183.66665 | 208.51882 | 166.00296 |
| 1.67551 | 182.9731  | 208.02756 | 166.01428 |
| 1.67438 | 182.26513 | 207.51882 | 166.02508 |
| 1.67325 | 181.54387 | 206.99303 | 166.03412 |



|         |           |           |           |
|---------|-----------|-----------|-----------|
| 1.67212 | 180.81049 | 206.45074 | 166.04008 |
| 1.671   | 180.06624 | 205.89259 | 166.0416  |
| 1.66988 | 179.31247 | 205.31935 | 166.03728 |
| 1.66875 | 178.55056 | 204.73185 | 166.02568 |
| 1.66763 | 177.782   | 204.13105 | 166.00533 |
| 1.66652 | 177.00832 | 203.51799 | 165.97474 |
| 1.6654  | 176.23113 | 202.8938  | 165.93242 |
| 1.66428 | 175.45207 | 202.25973 | 165.87685 |
| 1.66317 | 174.67287 | 201.61707 | 165.80654 |
| 1.66206 | 173.8953  | 200.96724 | 165.72001 |
| 1.66095 | 173.12118 | 200.3117  | 165.61581 |
| 1.65984 | 172.35236 | 199.652   | 165.49251 |
| 1.65873 | 171.59075 | 198.98976 | 165.34874 |
| 1.65762 | 170.83828 | 198.32665 | 165.18317 |
| 1.65652 | 170.09692 | 197.6644  | 164.99455 |
| 1.65541 | 169.36866 | 197.00479 | 164.78171 |
| 1.65431 | 168.65551 | 196.34964 | 164.54354 |
| 1.65321 | 167.95948 | 195.70078 | 164.27904 |
| 1.65211 | 167.28261 | 195.06011 | 163.98732 |
| 1.65101 | 166.62694 | 194.42949 | 163.6676  |
| 1.64992 | 165.99448 | 193.81084 | 163.3192  |
| 1.64882 | 165.38726 | 193.20604 | 162.9416  |
| 1.64773 | 164.80726 | 192.61698 | 162.53441 |
| 1.64664 | 164.25648 | 192.04552 | 162.09738 |
| 1.64555 | 163.73684 | 191.4935  | 161.63041 |
| 1.64446 | 163.25026 | 190.96271 | 161.13357 |
| 1.64337 | 162.7986  | 190.45489 | 160.6071  |
| 1.64228 | 162.38367 | 189.97175 | 160.05139 |
| 1.6412  | 162.00723 | 189.51488 | 159.46703 |
| 1.64012 | 161.67095 | 189.08585 | 158.85475 |

|         |           |           |           |
|---------|-----------|-----------|-----------|
| 1.63903 | 161.37646 | 188.68611 | 158.21551 |
| 1.63795 | 161.12529 | 188.317   | 157.55041 |
| 1.63687 | 160.91889 | 187.9798  | 156.86076 |
| 1.6358  | 160.75862 | 187.67563 | 156.14803 |
| 1.63472 | 160.64573 | 187.4055  | 155.41391 |
| 1.63365 | 160.58137 | 187.17031 | 154.66022 |
| 1.63257 | 160.56658 | 186.97078 | 153.88899 |
| 1.6315  | 160.60226 | 186.80751 | 153.10242 |
| 1.63043 | 160.68922 | 186.68093 | 152.30287 |
| 1.62936 | 160.82809 | 186.59131 | 151.49286 |
| 1.62829 | 161.0194  | 186.53874 | 150.67508 |
| 1.62723 | 161.26352 | 186.52315 | 149.85234 |
| 1.62616 | 161.56065 | 186.54426 | 149.02762 |
| 1.6251  | 161.91087 | 186.60163 | 148.204   |
| 1.62404 | 162.31406 | 186.69461 | 147.38468 |
| 1.62298 | 162.76997 | 186.82234 | 146.57298 |
| 1.62192 | 163.27814 | 186.98378 | 145.77229 |
| 1.62086 | 163.83796 | 187.17766 | 144.98609 |
| 1.6198  | 164.44862 | 187.40253 | 144.21791 |
| 1.61875 | 165.10915 | 187.65671 | 143.47134 |
| 1.61769 | 165.81837 | 187.9383  | 142.74999 |
| 1.61664 | 166.57491 | 188.24521 | 142.05748 |
| 1.61559 | 167.37722 | 188.57512 | 141.39744 |
| 1.61454 | 168.22353 | 188.9255  | 140.77345 |
| 1.61349 | 169.11189 | 189.29362 | 140.18907 |
| 1.61244 | 170.04014 | 189.67652 | 139.6478  |
| 1.6114  | 171.00592 | 190.07104 | 139.15304 |
| 1.61035 | 172.00667 | 190.47384 | 138.70811 |
| 1.60931 | 173.03962 | 190.88133 | 138.31618 |
| 1.60827 | 174.1018  | 191.28977 | 137.98031 |

|         |           |           |           |
|---------|-----------|-----------|-----------|
| 1.60723 | 175.19003 | 191.6952  | 137.70338 |
| 1.60619 | 176.30095 | 192.0935  | 137.4881  |
| 1.60515 | 177.43098 | 192.48034 | 137.33695 |
| 1.60412 | 178.57633 | 192.85124 | 137.25222 |
| 1.60308 | 179.73304 | 193.20155 | 137.23595 |
| 1.60205 | 180.89695 | 193.52645 | 137.28991 |
| 1.60102 | 182.06368 | 193.82098 | 137.41558 |
| 1.59998 | 183.22871 | 194.08005 | 137.61418 |
| 1.59896 | 184.38731 | 194.29842 | 137.88658 |
| 1.59793 | 185.53456 | 194.47073 | 138.23333 |
| 1.5969  | 186.66539 | 194.59152 | 138.65463 |
| 1.59587 | 187.77456 | 194.65522 | 139.15032 |
| 1.59485 | 188.85666 | 194.65617 | 139.71986 |
| 1.59383 | 189.90613 | 194.58863 | 140.36233 |
| 1.59281 | 190.91725 | 194.44679 | 141.07639 |
| 1.59178 | 191.88418 | 194.22478 | 141.86031 |
| 1.59077 | 192.80093 | 193.91671 | 142.71192 |
| 1.58975 | 193.66139 | 193.51661 | 143.62864 |
| 1.58873 | 194.45934 | 193.01852 | 144.60744 |
| 1.58772 | 195.18844 | 192.41646 | 145.64485 |
| 1.5867  | 195.84226 | 191.70446 | 146.73697 |
| 1.58569 | 196.41428 | 190.87656 | 147.87945 |
| 1.58468 | 196.89791 | 189.92682 | 149.06749 |
| 1.58367 | 197.28647 | 188.84934 | 150.29585 |
| 1.58266 | 197.57325 | 187.63827 | 151.55886 |
| 1.58165 | 197.75146 | 186.28783 | 152.85038 |
| 1.58065 | 197.81431 | 184.7923  | 154.16389 |
| 1.57964 | 197.75497 | 183.14605 | 155.49242 |
| 1.57864 | 197.56659 | 181.34354 | 156.82859 |
| 1.57764 | 197.24232 | 179.37935 | 158.16463 |

|         |           |           |           |
|---------|-----------|-----------|-----------|
| 1.57663 | 196.77533 | 177.24816 | 159.49237 |
| 1.57563 | 196.15882 | 174.94479 | 160.8033  |
| 1.57464 | 195.386   | 172.4642  | 162.08852 |
| 1.57364 | 194.45016 | 169.80147 | 163.33881 |
| 1.57264 | 193.34462 | 166.95187 | 164.54465 |
| 1.57165 | 192.0628  | 163.91082 | 165.69619 |
| 1.57065 | 190.59818 | 160.6739  | 166.78335 |
| 1.56966 | 188.94435 | 157.2369  | 167.79576 |
| 1.56867 | 187.09502 | 153.59577 | 168.72286 |
| 1.56768 | 185.04401 | 149.74668 | 169.55387 |
| 1.56669 | 182.78528 | 145.68598 | 170.27786 |
| 1.56571 | 180.31293 | 141.41026 | 170.88375 |
| 1.56472 | 177.62123 | 136.91629 | 171.36036 |
| 1.56374 | 174.70461 | 132.20108 | 171.69642 |
| 1.56275 | 171.5577  | 127.26187 | 171.88062 |
| 1.56177 | 168.17531 | 122.09611 | 171.90163 |
| 1.56079 | 164.55245 | 116.7015  | 171.74815 |
| 1.55981 | 160.68438 | 111.07597 | 171.4089  |
| 1.55883 | 156.56654 | 105.2177  | 170.87272 |
| 1.55785 | 152.19465 | 99.12508  | 170.12855 |
| 1.55688 | 147.56466 | 92.79679  | 169.16548 |
| 1.5559  | 142.67278 | 86.23172  | 167.9728  |
